# Supplementary material for: Positive regulators of T cell functions as predictors of prognosis and microenvironment characteristics of low-grade gliomas
Source: Front Immunol. 2023 Jan 16;13:1089792. doi: 10.3389/fimmu.2022.1089792 (PMC9885161; doi:10.3389/fimmu.2022.1089792)
Supplement: Supplementary file 4 [file Table_4.xlsx]

## Sheet: KEGG
Supplementary Table 4
Enrichment analysis results of Subtype 2 vs Subtype 1
ID	Description	GeneRatio	BgRatio	pvalue	p.adjust	qvalue	geneID	Count
hsa04024	cAMP signaling pathway	220/7724	221/8190	2.92541e-05	0.00974162	0.00720575	10451/196883/779/5293/5727/805/6548/64411/4886/84152/268/2903/1395/5880/778/7432/5021/7434/815/5733/489/2906/5295/482/64399/134/6755/817/4852/476/5732/6262/5350/56670/627/1261/6237/1258/2696/5500/9475/2735/5879/7410/23439/153/5595/2033/5894/492/5906/9568/2893/154/3725/5604/491/91860/483/170589/64764/2550/775/8503/4790/3362/27198/2488/5567/2902/814/11069/2770/10488/116443/54714/387/117/116/22800/4…	220
hsa04080	Neuroactive ligand-receptor interaction	356/7724	362/8190	9.36949e-05	0.0156002	0.0115393	2897/4887/1134/55584/5724/4886/624/2903/718/2357/1395/7432/5021/1903/7434/6863/84634/185/5733/3001/6869/2358/5734/6865/727/2831/1137/10203/2906/5023/887/100996758/5618/66004/5031/2564/3274/10316/3361/5646/10161/2898/187/134/2917/27334/2900/6755/4852/3060/1135/8484/1268/5732/5746/7433/4923/80763/136/1325/22953/5025/2913/130576/7442/2554/3269/2696/797/10886/151/10022/7068/3827/2847/5029/6866/3357/1…	356
hsa04015	Rap1 signaling pathway	208/7724	210/8190	0.000378402	0.0420027	0.0310688	5154/10451/196883/3683/5899/83593/5293/7408/1969/805/3690/64411/4233/6714/8631/2903/60/2357/5155/5880/7422/10636/83660/54518/3937/1943/1399/5590/27006/2321/7424/57121/6494/3689/284/5295/25780/5582/5603/1946/3684/51466/3397/2277/1268/2261/22808/136/9732/6237/2263/5879/7410/3791/1902/2252/10235/5595/2255/5894/1436/5906/57568/5604/91860/375189/9002/5579/56288/1942/8503/3688/2264/3265/2902/9965/11069…	208
hsa04722	Neurotrophin signaling pathway	119/7724	119/8190	0.000890754	0.0430999	0.0318804	6272/5293/805/6464/356/57498/6195/25/815/1399/6197/3656/2932/27330/11108/4794/5295/5580/5603/397/25970/817/627/8767/51135/10818/5879/5595/6196/5894/5906/398/3725/9261/5604/91860/8503/4790/25759/11213/3265/5609/9252/814/4908/387/3654/596/10000/208/5291/818/4909/5336/7189/2885/4803/10603/7157/7531/9500/673/5663/396/4214/1432/5602/4792/5594/4215/2889/468/810/5170/5781/4893/5605/4915/3551/5335/399694…	119
hsa04218	Cellular senescence	155/7724	156/8190	0.00104088	0.0430999	0.0318804	3552/83593/5293/805/5054/472/23411/3107/3133/677/5295/7042/5603/823/1875/7048/5481/10912/5533/1026/22808/4776/4773/8878/2308/10758/6237/5500/10111/3486/7416/8900/7248/3576/291/5595/5894/4609/9134/896/9261/4087/5604/91860/85417/1021/8503/4790/5883/3709/3265/3805/678/10114/293/22800/147746/3710/10000/824/208/5530/5291/5608/5934/11200/5532/1978/5933/204851/4193/91750/7157/4088/5728/55957/1432/1111/1…	155
hsa04934	Cushing syndrome	154/7724	155/8190	0.00109842	0.0430999	0.0318804	51384/196883/7471/779/1857/2535/8323/196/1395/778/23746/815/185/8312/54554/6932/2932/57552/8322/11211/5087/1583/817/83439/1856/1026/8326/11091/7855/7474/5595/6934/54361/5906/1027/9134/8913/7477/5604/64764/775/1021/3709/5567/9070/8912/2770/10488/3164/7479/3710/6770/2778/818/1031/1499/7482/5331/2767/9049/7481/112/2771/6667/7475/90993/51655/4221/673/3283/9586/8911/324/5151/5594/7483/8622/8313/50940/…	154
hsa05132	Salmonella infection	245/7724	249/8190	0.00112742	0.0430999	0.0318804	6990/841/79792/5293/84516/27128/197259/57381/79443/113146/653857/9265/60/6188/83547/2318/10627/103910/837/51807/51429/11035/29109/840/5420/10096/6932/84790/7132/7277/7184/4615/5603/8737/114609/10376/6281/83439/89953/114548/8655/7100/8767/836/3071/29895/51135/6237/55207/388/9475/838/399/3576/5879/8743/25828/7097/7099/5595/4671/23643/6934/5894/4609/26263/10382/3725/3800/5604/65082/382/375189/10540/…	245
hsa04261	Adrenergic signaling in cardiomyocytes	149/7724	150/8190	0.00143657	0.0430999	0.0318804	196883/779/5522/805/7170/6548/6547/778/59283/815/185/489/482/28227/5603/6324/817/476/5516/6262/5350/786/7171/4625/5500/146850/23439/153/5595/492/782/6543/154/6332/491/91860/483/7134/64764/775/148/23533/781/5567/4635/3753/9252/11069/2770/10488/6330/596/480/2778/10000/208/7139/818/55844/5331/7168/5520/55012/783/785/5525/112/7137/5529/2771/10411/90993/93589/59285/9586/1432/5502/5594/488/6546/108/70/…	149
hsa04360	Axon guidance	180/7724	182/8190	0.00155228	0.0430999	0.0318804	5293/5727/1969/5998/2242/64101/4233/6714/6586/8482/5880/10627/103910/9901/25/1943/815/7224/8633/5590/54961/137970/22854/56924/2932/6091/5295/9353/1948/2043/219699/1946/817/9723/1947/10371/5533/6405/29984/2041/2047/7220/2042/4776/4773/7223/1073/6237/7852/9475/10507/5879/4690/7474/54434/5595/151449/5894/8829/54361/6585/59277/1808/23654/7222/56288/1942/8503/223117/23380/3688/1630/3611/3265/2770/5062…	180
hsa04066	HIF-1 signaling pathway	109/7724	109/8190	0.00161383	0.0430999	0.0318804	7076/5293/5054/4846/1977/3162/4055/7422/7018/815/387712/2321/284/5295/5582/5162/6774/92483/4843/5209/817/2872/1026/3458/7037/2023/7099/6199/5595/3460/2033/1027/2064/5604/3098/5579/3570/8503/4790/6513/2027/8453/285/5163/596/1950/10000/208/5291/818/5213/112398/80201/5336/253314/2056/1906/3091/112399/230/1978/3948/9978/5594/229/5161/5232/9470/5605/5335/7010/5160/6923/3630/54583/405/2475/2026/5970/69…	109
hsa04020	Calcium signaling pathway	236/7724	240/8190	0.00168604	0.0430999	0.0318804	5154/196883/779/805/4233/5724/4846/624/2903/4638/5153/9630/6547/5155/10105/80271/778/6263/5021/7422/815/185/5733/6869/5137/27006/6865/489/2321/7424/2185/55283/2906/5023/887/5582/80228/3274/5255/3361/4843/817/5533/2277/6262/5350/2769/4923/2261/3707/136/22953/5025/3269/7852/2263/7416/2668/3357/291/3791/1131/2252/153/53373/845/2255/492/844/8913/5260/6543/154/2064/6261/491/91860/5579/7134/57620/775/3…	236
hsa05224	Breast cancer	146/7724	147/8190	0.0016867	0.0430999	0.0318804	51384/7471/1857/5293/2535/8323/10023/6464/8312/27006/3714/6932/2932/23401/8322/5295/26508/11211/182/10912/83439/1856/1026/1643/8326/7855/7474/6199/2252/5595/6934/2255/5894/54361/4609/3725/7477/2064/5604/23462/54567/1021/8503/25759/8202/3265/9965/10683/7479/4854/4041/1950/10000/208/4040/8817/5291/1499/7482/2885/7481/7157/6667/7475/2247/5241/2248/3815/673/5728/2249/8600/324/26291/5594/7483/8313/864…	146
hsa04010	MAPK signaling pathway	288/7724	294/8190	0.00173956	0.0430999	0.0318804	3552/5154/5924/779/1969/2069/5971/4233/8986/5321/5871/51776/356/2318/5155/5880/11221/1847/6195/778/84867/7422/59283/1943/1399/3315/1845/6197/27006/2321/7424/1844/7132/27330/284/409/25780/5582/7042/4615/3310/8681/5603/1946/7048/10912/11184/5533/2277/2872/9064/2261/22808/786/627/836/374/3481/51135/5778/6237/2263/5879/3791/2252/10235/5595/6196/2255/5894/1436/5906/4609/994/100137049/782/1852/8913/934…	288
hsa04014	Ras signaling pathway	232/7724	236/8190	0.00201283	0.0430999	0.0318804	5154/5924/5322/5320/5899/83593/5293/1969/805/4233/6464/2114/5321/2903/356/54979/5155/5880/64926/2788/8437/7422/25/1943/391013/9610/27006/2321/7424/56924/8398/26279/284/94235/5295/25780/5582/2785/2793/8681/1946/51764/2277/2791/7535/2261/27/22808/627/11145/5966/3481/6237/2263/253959/5879/3791/2252/10235/5595/2255/5894/1436/5906/100137049/100271927/23179/11186/2782/5604/91860/382/5579/8399/115727/19…	232
hsa04550	Signaling pathways regulating pluripotency of stem cells	142/7724	143/8190	0.00208789	0.0430999	0.0318804	51384/7471/7703/1857/93/5293/2535/8323/3718/7994/8312/84108/6932/3198/2932/8322/5013/5295/4090/3717/5603/11211/6774/4211/3397/6929/2103/1856/2261/90/2263/8326/657/7855/3572/7474/3624/3231/3211/5595/8820/5894/54361/4609/1852/84759/7477/4087/5604/463/5460/6657/648/4089/10637/9314/56916/8503/5978/2264/3265/6926/3626/7479/3670/10000/208/3400/5291/130399/1499/3625/7482/55183/79923/2885/7481/7475/4088/…	142
hsa04625	C-type lectin receptor signaling pathway	104/7724	104/8190	0.00217162	0.0430999	0.0318804	841/5293/1263/9641/805/5971/3659/6714/1960/1540/868/4046/64581/6850/602/5295/5580/6772/5603/5533/114548/22808/4776/4773/6237/2207/5595/5894/6773/26253/3593/3725/9261/91860/8503/4790/3709/51561/3265/8915/387/64170/23365/22800/3710/10000/6361/208/5530/5291/30835/10332/5336/10379/8517/5532/93978/4193/1432/338339/5602/53342/4792/5594/5535/4775/810/5781/4893/3558/3551/5600/1147/3845/3592/51806/5970/90…	104
hsa04140	Autophagy - animal	140/7724	141/8190	0.00232232	0.0430999	0.0318804	440738/84557/5293/55062/83452/285973/10325/3476/81671/3920/3916/643246/58476/9140/84938/5295/5580/8673/3146/11337/11345/51100/64422/5516/1514/1508/22808/10533/8878/6237/1509/1965/7248/55255/8897/6199/5595/5894/64121/5604/58528/8503/55054/598/5567/3265/10645/5563/29110/9342/29982/64223/596/22800/5289/23604/10000/8471/208/5291/6885/140775/54541/84335/64798/53349/7189/3091/7405/203228/23192/26100/86…	140
hsa04510	Focal adhesion	198/7724	201/8190	0.00268077	0.0430999	0.0318804	5154/10451/1292/1277/5293/6696/7408/29780/3690/4233/8395/6714/6464/3913/3696/1101/4638/60/256076/3908/10319/2318/5155/5880/10627/103910/7450/3672/7422/1284/83660/858/1399/87/3675/7060/2321/7424/7791/56924/2932/3678/1311/3679/5295/5582/1278/2335/3912/3695/3655/3381/2277/1293/3685/3910/7143/8516/29895/5500/9475/5879/3915/7410/3791/1287/5595/5894/5906/896/3914/3725/2064/8394/5604/5579/54776/857/8503…	198
hsa04933	AGE-RAGE signaling pathway in diabetic complications	100/7724	100/8190	0.00275338	0.0430999	0.0318804	3552/1281/2152/1277/5293/5054/4846/6777/7056/7422/1284/185/5590/3383/7424/5295/7042/5580/6772/6347/3717/5603/6774/1278/2335/7048/2277/836/2308/3576/5879/4313/1287/5595/5292/1027/3725/4087/5579/4089/8503/4790/3265/177/596/5333/27035/10000/208/5291/5336/5331/1906/4088/84812/1432/1285/5602/5594/1019/5581/4893/5335/5600/1729/3845/113026/5332/7040/5970/7046/1288/7423/23236/595/207/7412/5290/51196/6300…	100
hsa04310	Wnt signaling pathway	168/7724	170/8190	0.00280501	0.0430999	0.0318804	59352/51384/5176/8840/7471/4007/1857/6424/2535/8061/164284/8323/22943/6477/10023/6425/2487/79816/5880/1454/4919/815/85407/8312/27123/57216/6932/2932/23401/8322/5582/11211/817/340419/5533/83439/1856/4776/4773/8549/8326/9475/7855/7090/5879/7474/23002/5467/84870/6934/2033/54361/4609/4316/896/3725/7477/1459/1460/5579/51701/8607/4089/1488/7091/5567/79718/57680/387/7479/4041/6907/6259/4040/5530/90665/6…	168
hsa04750	Inflammatory mediator regulation of TRP channels	98/7724	98/8190	0.00310019	0.0430999	0.0318804	79054/196883/5293/805/6714/5321/624/51393/5583/815/8989/5734/8398/5295/5582/5580/8681/5603/817/5732/162514/7442/3269/1573/5500/9311/3827/5029/3357/100137049/91860/5579/3556/8503/3709/5567/3710/2778/5291/818/5608/5336/5331/239/4803/112/1432/5602/108/5581/810/5568/114/5335/3358/5600/113/255189/51806/5332/5588/111/4914/123745/59341/2776/109/163688/23236/40/51802/115/5290/6300/5499/2150/8605/5501/557…	98
hsa04925	Aldosterone synthesis and secretion	98/7724	98/8190	0.00310019	0.0430999	0.0318804	196883/779/805/778/815/185/5582/482/1583/817/476/23439/492/8913/1585/491/91860/5579/483/64764/775/3709/5567/747/8912/814/10488/3164/480/3710/6770/2778/51305/3991/818/5331/8536/2767/112/90993/3283/9586/466/8911/23683/108/5581/468/810/5568/4158/5138/114/4881/478/3284/113/51806/5332/5587/111/3949/2776/4878/109/25865/163688/221955/1589/23236/493/776/84699/1386/115/477/5578/107/4929/57118/808/148327/3…	98
hsa05231	Choline metabolism in cancer	98/7724	98/8190	0.00310019	0.0430999	0.0318804	5154/5293/56994/8395/5321/7454/5155/5880/126969/5295/5582/8681/8525/8612/8611/7248/8526/5879/6199/5595/6580/5894/100137049/3725/8394/5604/5579/8503/3265/60482/1950/10000/208/5291/1606/57153/3091/2885/10434/1978/1119/1608/6667/1120/204962/8936/23446/5602/6584/5594/9468/10810/56261/5170/4893/5605/5335/6582/3845/255189/6581/2475/1607/80736/123745/9162/1956/5130/207/56034/23396/5156/1609/5290/5900/23…	98
hsa04022	cGMP-PKG signaling pathway	165/7724	167/8190	0.00324764	0.0430999	0.0318804	196883/779/7408/805/4846/624/4638/4205/6547/10105/778/185/489/4880/482/134/5533/476/5350/4209/4776/4773/4625/1258/5500/9475/151/7416/3827/146850/152/291/23439/157855/153/5595/5894/10242/492/5592/4207/6543/154/5604/491/91860/483/64764/775/91807/5593/148/3709/23533/2770/10488/293/387/480/3710/10000/8471/140/208/5530/5331/340156/4985/27094/8654/5532/2767/5139/112/85366/2771/8660/90993/2977/9586/7225…	165
hsa04151	PI3K-Akt signaling pathway	345/7724	354/8190	0.00324812	0.0430999	0.0318804	5154/3566/1292/3560/1277/5293/6696/1969/2069/930/5522/3690/842/4233/9180/4846/3913/3696/7529/1101/1441/256076/3908/356/10319/3718/5155/2997/3561/1977/7450/118788/3672/5106/2788/7422/1284/3575/1943/7533/3675/7060/27006/2321/7424/57121/6850/2932/3678/1975/284/1311/94235/5618/3679/7184/5295/2785/23239/2793/28227/3717/10161/1946/1278/51764/2335/3912/7534/3695/3655/3381/5516/2277/2791/2261/57818/1293/…	345
hsa04270	Vascular smooth muscle contraction	133/7724	134/8190	0.00336516	0.0430999	0.0318804	5322/196883/4627/5320/779/805/5321/4638/778/5583/10268/185/391013/8398/10203/26279/5582/4880/5580/8681/136/5500/9475/797/157855/5595/5894/10242/551/100137049/5592/9826/796/5604/91860/5579/8399/54776/9138/775/91807/148/3709/72/5567/94274/387/64600/133/23365/3710/2778/5331/340156/27094/1906/2767/30814/112/85366/673/2977/79784/1909/4882/5594/553/108/5581/810/5568/114/369/5605/4881/140465/2982/10266/…	133
hsa04142	Lysosome	131/7724	132/8190	0.00373965	0.0461223	0.0341161	6272/130340/1075/6556/967/2519/8763/4758/3920/3074/3423/3916/51172/10577/27074/1522/135112/1521/1200/23457/2517/1514/1176/3482/1508/285362/2581/1509/20/533/427/1520/9516/23659/8692/3425/8905/8906/23335/26985/7805/8218/58511/57192/26503/51606/2760/23545/1213/55353/9741/6609/2629/5538/1513/1515/8546/5660/162/535/11154/1174/10053/8943/9374/6448/4126/411/4125/4669/1212/968/1497/256471/84572/164/1203/…	131
hsa05131	Shigellosis	242/7724	247/8190	0.00402824	0.0478829	0.0354184	440738/92610/84557/5293/55062/27128/115004/23157/6714/472/10325/653857/9265/60/718/10627/103910/837/6352/83660/1399/643246/87/10096/831/7132/2932/3678/9140/5295/7316/4615/5580/5603/823/8737/3059/5481/114548/55752/7100/8290/8767/8353/8878/2308/29895/81858/9475/7416/3576/5879/440093/7099/6199/5595/4671/4735/6233/64121/3725/3098/382/375189/58528/8503/55054/4790/3688/3709/100132074/598/3611/375/989/9…	242
hsa04912	GnRH signaling pathway	93/7724	93/8190	0.00416998	0.0478829	0.0354184	196883/779/805/6714/5321/778/815/2185/5580/8681/5603/817/4323/4313/5595/5894/100137049/3725/5604/91860/5579/775/2798/3709/2488/5567/3265/5609/4216/3710/2778/818/5608/5331/3972/2002/2767/2885/112/4214/1432/2796/5602/5594/4215/108/468/810/5568/114/4893/5605/5600/113/10746/3845/255189/51806/5332/111/2797/123745/2776/109/163688/23236/1956/776/115/5598/6300/998/8605/5578/6654/107/5337/808/6416/5599/37…	93
hsa05410	Hypertrophic cardiomyopathy	90/7724	90/8190	0.0049813	0.0550005	0.0406832	779/7170/3690/1674/3696/60/3908/6547/778/3672/59283/3675/489/3678/3679/7042/51422/3695/3655/6262/786/3685/7171/8516/4625/53632/782/6543/7134/775/7273/3688/781/5563/3680/1756/5565/7139/1636/7168/783/1906/785/1605/6445/7137/93589/59285/488/284217/6546/2010/3694/6443/6444/70/5571/5562/7040/7169/10369/71/4000/3676/776/8515/3674/4633/4607/3673/4624/5564/784/3691/487/3569/10368/59284/55799/9254/22801/7…	90
hsa04110	Cell cycle	125/7724	126/8190	0.00512563	0.0550005	0.0406832	29882/472/7529/25/7533/5885/10744/2932/51343/7042/5347/1875/7534/10912/5000/8379/1026/1032/8243/8900/2033/4609/1027/7532/994/9134/7272/896/3066/2810/25847/4087/85417/4089/1021/10735/10274/10926/23595/25906/9088/8555/1031/7709/8556/5934/4175/8317/10459/11200/29945/5933/8697/4193/3065/4172/7157/4088/7531/4174/1111/990/1874/9978/1022/701/890/9133/8318/545/1030/1019/51434/51529/4171/1869/902/4998/970…	125
hsa05235	PD-L1 expression and PD-1 checkpoint pathway in cancer	89/7724	89/8190	0.00528533	0.0550005	0.0406832	916/5293/915/5777/917/10538/116071/5133/4794/5295/4615/6772/920/3717/5603/6774/114609/5533/7535/4773/3458/7097/7099/6199/5595/3460/5894/3725/1459/5604/1460/55509/8503/4790/10125/3265/1950/10000/208/5530/5291/5608/238/8517/7189/5532/3091/5728/1432/3716/4792/5594/4215/54106/5535/4775/5781/4893/5605/27436/3551/5335/5600/1147/3845/2475/5588/5970/27040/283106/1956/207/148022/353376/3459/5290/2353/5534…	89
hsa04540	Gap junction	88/7724	88/8190	0.00560788	0.0557387	0.0412292	5154/196883/6714/5155/51807/84790/7277/5582/57369/10376/2697/3357/1902/153/5595/5894/5592/10382/5604/5579/5593/84617/3709/5567/203068/3265/2770/3710/1950/2778/5331/347733/2767/2885/112/2771/2977/1453/7082/7278/5594/108/5568/114/4893/5605/2982/3358/113/10746/3845/5607/5332/2773/983/111/1813/113457/2911/2776/109/112714/347688/23236/1956/56034/2983/115/5156/5598/7846/5578/6654/107/10383/2915/3356/37…	88
hsa04611	Platelet activation	123/7724	124/8190	0.00569104	0.0557387	0.0412292	196883/1281/1277/5293/7408/3690/4846/6714/5321/4638/60/83706/10627/103910/7450/83660/54518/5742/3937/5590/6850/5023/5295/8673/8681/5603/1278/695/4067/5500/9475/146850/2207/10235/5595/2243/2814/5906/100137049/5592/9002/9138/8503/91807/3688/5593/3709/23533/10125/5567/2770/387/23365/3710/7094/2778/10000/208/5291/5336/2147/5331/340156/64805/2909/2244/112/85366/2771/2977/1432/2812/6915/2149/5594/108/5…	123
hsa04921	Oxytocin signaling pathway	152/7724	154/8190	0.00608473	0.0568178	0.0420274	196883/779/1938/805/4846/6714/7226/5321/4638/60/778/6263/5021/59283/815/1827/5582/51422/8681/817/5533/6262/1026/786/4776/4773/5500/9475/146850/53632/5595/3761/5894/100137049/782/3725/6261/5604/91860/5579/54776/775/91807/3709/23533/781/5567/3265/10645/5563/814/2770/387/3710/5565/2778/5530/818/5331/8536/340156/2775/2002/783/5532/785/112/85366/2771/93589/59285/2977/4882/5594/108/5535/4775/29904/810/…	152
hsa04911	Insulin secretion	86/7724	86/8190	0.00631308	0.0568178	0.0420274	196883/779/778/815/3783/2645/5582/482/817/476/6262/3781/6833/23439/157855/1131/54795/10242/6616/3780/5579/483/64764/775/5567/6513/11069/10488/117/116/480/3710/2778/818/5331/3767/27094/2767/112/6514/90993/139760/2641/9586/9699/2695/108/468/5568/114/478/113/3651/3630/5332/3782/111/6844/2776/109/23236/776/84699/1386/115/477/27345/2864/6804/3779/2740/5578/486/107/3778/5864/886/148327/481/5330/816/138…	86
hsa05210	Colorectal cancer	86/7724	86/8190	0.00631308	0.0568178	0.0420274	5899/5293/2069/842/5880/8312/6932/2932/5295/7042/7048/10912/83439/1026/4292/1643/836/374/5879/6199/5595/6934/5894/4609/5366/3725/4087/5604/4089/8503/1630/3265/27113/10018/54205/387/596/1950/10000/208/5291/1499/2885/7157/4088/673/324/5602/5594/5898/8313/4436/4437/369/4893/5605/3845/51426/2475/7039/7040/332/7046/1956/595/207/2956/5290/5900/2353/581/51176/578/1647/6198/6654/5599/10297/4616/7043/5296…	86
hsa04919	Thyroid hormone signaling pathway	120/7724	121/8190	0.00665531	0.0583215	0.0431397	5293/6548/3690/842/6714/60/23389/1827/489/9862/2932/5295/5582/482/6772/9882/9440/1733/476/5350/3685/1734/2308/6567/4625/9968/1735/90390/7068/23439/5595/2033/5894/54361/4609/9969/3066/2648/5604/6257/5579/483/8503/5567/8202/6513/3265/7067/4854/5333/480/10000/208/5291/5213/1499/53919/5336/5331/3091/4193/3065/9611/7157/84812/89869/5594/488/8648/5170/5568/4893/5605/116931/117247/478/29079/5335/3845/48…	120
hsa04071	Sphingolipid signaling pathway	118/7724	119/8190	0.00738508	0.0630573	0.0466426	5293/5522/4846/624/5880/637/8560/1903/5590/8439/7132/5295/5582/28227/5603/134/5516/10715/1509/9475/56624/427/3827/130367/5879/2207/5595/5894/259230/5604/5579/8503/4790/3265/2770/387/6609/596/10000/140/208/5291/56848/55844/5331/5520/8877/4985/79603/55012/5525/6610/5529/2771/7157/340485/5728/1432/2206/5602/5594/253782/125981/5581/5170/2205/4893/5605/4217/5518/5600/3845/5523/123099/5332/2773/10672/5…	118
hsa05205	Proteoglycans in cancer	201/7724	205/8190	0.007638	0.0635863	0.047034	51384/10451/4478/7471/8826/5329/1277/5293/2535/5727/8323/287/6548/3690/4233/6714/6385/967/60/356/2318/4318/5777/2719/7422/815/858/4060/5328/7023/3678/1975/8322/5295/5582/7042/5603/11211/6774/1278/2335/3059/817/6383/1514/117581/1026/22808/3685/836/3481/6237/5500/8326/10818/9475/7855/5879/4313/7474/7410/7097/3791/7099/6199/5595/5894/54361/4609/3593/7477/4087/2064/7430/5604/5579/54776/857/9138/8503/…	201
hsa04072	Phospholipase D signaling pathway	146/7724	148/8190	0.00809624	0.0657573	0.0486398	5154/196883/5899/5293/27128/8395/6464/5321/9265/5155/55326/185/2185/57121/6850/5295/8681/10161/8525/2917/8612/8611/22808/2913/6237/7248/3576/8526/146850/1902/2207/5595/3579/5894/551/100137049/10555/8394/5604/382/8503/25759/23533/375/3265/11069/387/22800/1950/2778/10000/208/5291/56848/1606/5336/2147/5331/8877/9267/2885/112/1608/10411/3815/2206/56895/2149/5594/5898/553/108/4254/5781/114/2205/4893/5…	146
hsa04120	Ubiquitin mediated proteolysis	140/7724	142/8190	0.0107419	0.0808362	0.0597935	29882/7318/23759/134111/6477/9820/55294/8651/868/23221/51343/9021/7316/64750/90293/7327/26232/54926/1161/118424/1643/51366/26259/9063/378884/8452/6233/8925/25847/9246/65264/9040/57448/8453/51465/7337/5071/7323/7329/25906/10277/79444/7325/10055/331/26272/5371/4734/7189/329/29945/55120/7311/8697/7326/7321/10054/4193/1642/11065/22954/8065/4214/64326/55585/55236/10477/7317/9978/867/51434/51529/84447/…	140
hsa05412	Arrhythmogenic right ventricular cardiomyopathy	77/7724	77/8190	0.0107541	0.0808362	0.0597935	779/1829/1495/3690/1674/3696/60/3908/6547/778/3672/59283/3675/489/6932/3678/3679/3695/3655/83439/6262/786/3685/8516/2697/6934/29119/782/6543/775/3688/781/3680/1756/1499/5318/783/785/1605/6445/1000/93589/59285/1496/488/284217/6546/2010/3694/6443/6444/10369/71/4000/3676/776/8515/3674/89/1832/3673/51176/784/3691/487/10368/59284/55799/9254/22801/27092/88/3728/1824/3693/27091/6442	77
hsa05166	Human T-cell leukemia virus 1 infection	217/7724	222/8190	0.0109653	0.0808362	0.0597935	196883/3683/3560/916/29882/5293/8061/3127/3122/5971/3600/2114/3118/472/958/7538/915/3718/6777/3561/4055/917/83660/3107/3133/6688/3119/3383/3115/7132/10744/3689/2224/5295/10524/7042/3108/920/387332/6908/7048/6929/9519/5533/64784/8379/1026/4776/4773/3117/3123/7416/8900/567/291/5595/3559/2033/3112/5902/8829/4609/9134/4316/896/811/706/2648/3725/25847/4087/5604/4089/64764/8503/4790/598/5567/6513/3265/…	217
hsa04971	Gastric acid secretion	76/7724	76/8190	0.0114093	0.0808362	0.0597935	196883/805/760/6548/4638/60/815/887/5582/482/3274/817/476/3758/3773/23439/1131/7430/91860/5579/483/91807/3709/5567/2770/480/3710/2778/818/5331/496/340156/389015/54207/112/85366/2771/6752/6522/3766/9992/108/810/5568/114/478/113/51806/5332/2773/3776/2520/111/2776/109/163688/23236/115111/71/115/3759/477/5578/107/808/495/3708/481/3784/5330/816/3772/1080/6750/801/5566	76
hsa05133	Pertussis	76/7724	76/8190	0.0114093	0.0808362	0.0597935	3552/716/710/715/805/3659/718/712/840/727/3678/3689/4615/5603/3684/4843/114609/114548/836/51135/1073/725/3576/713/7099/5595/23643/3593/3725/717/91860/4790/3688/51561/722/2770/387/729238/3654/7189/2771/6374/1432/5602/5594/653509/810/5600/3592/51806/2773/5970/163688/148022/353376/721/3661/3394/2353/6300/29108/3569/1072/808/5599/7124/929/10392/3553/834/6372/5601/720/714/3586/801	76
hsa05212	Pancreatic cancer	76/7724	76/8190	0.0114093	0.0808362	0.0597935	5899/5293/842/5880/7422/5295/7042/6772/6774/7048/10912/1026/1643/5879/6199/5595/5894/4087/2064/5604/4089/1021/8503/4790/598/10928/1950/10000/208/5291/8517/7157/4088/5888/673/5602/3716/5594/5898/675/1019/369/1869/9459/3551/1147/3845/51426/2475/7039/7040/5970/7046/1956/595/207/5290/5900/581/578/998/1647/1870/6198/5337/1029/5599/4616/7043/5296/5881/1871/5338/5601/572/5925	76
hsa05214	Glioma	75/7724	75/8190	0.0121044	0.0834708	0.0617423	5154/5293/805/6464/5155/815/5295/5582/817/10912/1026/1643/5595/5894/5604/91860/5579/1021/8503/25759/3265/814/1950/10000/208/5291/818/5336/8536/2885/4193/7157/673/5728/5594/1019/810/369/4893/1869/5605/5335/399694/3845/51426/51806/2475/7039/53358/163688/1956/595/207/5156/5290/581/578/1647/1870/5578/6654/57118/808/1029/4616/5296/6655/816/1871/3480/3479/57172/801/5159/5925	75
hsa04371	Apelin signaling pathway	137/7724	139/8190	0.0123592	0.0834708	0.0617423	440738/5327/196883/84557/6696/805/5054/6548/4846/4638/4205/7019/6547/6263/9759/2788/185/643246/94235/2785/2793/51422/187/51764/4843/182/6262/2791/4209/22808/6237/146850/53632/6199/5346/5595/100506013/5894/4207/6543/4087/6261/2782/5604/91860/4089/2787/91807/3709/23533/5567/4635/3265/5563/814/2770/4854/22800/5289/3710/5565/10000/208/3991/56848/10014/5331/8877/340156/1490/112/85366/2771/10681/2790/4…	137
hsa05202	Transcriptional misregulation in cancer	189/7724	193/8190	0.0125331	0.0834708	0.0617423	51384/5154/5327/51513/3560/1051/7490/4233/64332/861/860/472/4005/958/904/4318/8842/597/5077/6688/55589/5328/2321/2530/7704/7468/4613/4314/4300/5087/3684/5090/6935/2313/4211/8013/3695/7048/6929/10912/79058/1026/8290/2115/5966/1643/8353/2308/8464/942/3486/8091/7185/8900/3576/4094/4291/440093/2130/5081/1436/4609/1027/51274/3066/7030/1848/6257/9915/1050/1669/648/4790/8861/598/26471/6692/7850/7403/711…	189
hsa04210	Apoptosis	134/7724	136/8190	0.0142087	0.0925585	0.0684644	843/841/5293/842/1075/472/60/356/637/51807/597/840/84790/7132/1522/7277/1521/5295/5551/823/27429/8737/10376/10912/1514/1508/836/8739/1509/7185/1965/1520/8743/5595/5894/5366/3725/5604/5783/8503/4790/3709/598/3265/27113/10018/54205/1513/1515/596/3710/10000/824/208/5291/331/5414/8517/329/8795/4803/2021/317/7157/8772/5602/142/4792/7278/5594/9451/2081/468/5170/6709/4893/1512/5605/3551/3562/4217/1147/3…	134
hsa05218	Melanoma	72/7724	72/8190	0.0144536	0.0925585	0.0684644	5154/5293/4233/5155/27006/5295/10912/1026/1643/2252/5595/2255/5894/5604/1021/8503/3265/9965/1950/10000/208/8817/5291/4193/7157/2247/2248/673/5728/2249/26291/5594/1019/369/4893/1869/5605/2251/2250/3845/51426/8074/2260/1956/595/207/56034/2253/5156/5290/999/581/26281/578/1647/1870/8823/1029/4286/4616/2246/3082/5296/1871/3480/2254/3479/572/8822/80310/5159/5925	72
hsa04520	Adherens junction	71/7724	71/8190	0.0153337	0.0963418	0.0712628	8826/1495/4233/6714/60/7454/5777/5880/87/6932/7048/83439/117178/4008/5879/5770/5595/6934/2033/5819/29119/2064/1459/1460/51701/4089/56288/10458/387/5795/6885/1499/5792/4088/9855/8936/7082/1496/5594/5797/2241/10810/7525/81607/8976/6591/1500/10580/7046/3643/7414/25945/2260/283106/1956/5818/5787/71/999/51176/4301/998/2534/1457/1387/10163/5881/3480/81/52/6615	71
hsa04660	T cell receptor signaling pathway	103/7724	104/8190	0.0159816	0.098553	0.0728984	10451/916/5293/925/926/3702/9402/915/5777/868/959/917/1493/5133/3937/56924/2932/4794/5295/84433/920/5603/5533/7535/4773/3458/4690/7410/5595/5894/3725/5604/1326/8503/4790/10125/3265/5609/8915/5062/387/10000/208/5530/5291/6885/8517/5532/1739/2885/57144/1432/5063/5602/4792/5594/1019/5535/4775/106821730/5170/1437/4893/3558/5605/3551/927/5335/5600/1147/3845/3567/5588/5970/9020/27040/207/3565/5290/2353…	103
hsa04924	Renin secretion	69/7724	69/8190	0.0172575	0.104486	0.0772873	779/805/5153/778/358/185/5137/5734/134/5533/5732/1508/153/1179/154/91860/775/5593/3709/5567/2770/117/116/3710/2778/5530/1636/5136/5331/5532/1906/22802/5139/112/2771/2977/1909/5972/5535/810/5568/4881/2982/51806/5332/2773/9635/111/2776/4878/163688/5140/1908/23236/776/2983/5534/3759/155/3778/808/3708/5330/84876/1385/183/801/1907/5566	69
hsa05142	Chagas disease	101/7724	102/8190	0.0176926	0.105208	0.0778208	841/916/5293/5522/5054/624/915/718/9630/356/712/917/6352/7132/5295/7042/4615/6347/5603/4843/7048/5516/2769/3458/51135/3827/3576/7097/713/7099/5595/3460/811/3593/3725/4087/8503/4790/10333/2770/3654/2778/10000/208/5291/1636/55844/5331/5520/2775/8517/7189/2767/2771/8772/2774/1432/5602/4792/5594/6348/54106/3558/3551/5518/5600/1147/3592/3456/5332/2773/414062/7040/5970/7046/2776/5515/5519/23236/207/148…	101
hsa04916	Melanogenesis	100/7724	101/8190	0.0186134	0.108742	0.0804347	51384/196883/7471/1857/2535/8323/805/7306/815/6932/2932/8322/5582/11211/817/83439/1856/8326/7855/7474/5595/6934/2033/5894/54361/4157/7477/5604/91860/5579/64764/5567/3265/2770/10488/7479/2778/818/1499/7482/5331/2775/1906/7481/112/2771/7475/90993/3815/5594/7483/1855/108/434/4254/810/81029/5568/114/4893/5605/1910/113/3845/51806/5332/2773/111/89780/2776/109/163688/23236/1638/7976/7478/84699/115/80326…	100
hsa05221	Acute myeloid leukemia	67/7724	67/8190	0.0194221	0.109046	0.0806601	5293/861/6777/597/6688/11040/6932/7704/5295/6774/3684/83439/8900/6199/5595/5467/6934/5894/1436/5292/4609/5604/1848/1050/8503/4790/3265/10000/208/5291/5914/5371/8517/2322/2885/1978/3815/673/5594/890/1437/369/4893/8864/5605/3551/3562/1147/3845/2475/5970/595/207/862/5290/4353/51176/1053/6198/6654/6776/2209/5296/929/6655/3728/572	67
hsa04926	Relaxin signaling pathway	127/7724	129/8190	0.0196095	0.109046	0.0806601	196883/1281/1277/5293/4846/6714/6464/4318/2788/7422/1284/5590/7424/409/94235/5295/2785/2793/5603/1278/51764/4843/7048/2277/2769/2791/10022/4313/1287/5595/5894/3725/4087/2782/5604/64764/2787/8503/4790/25759/4322/5567/3265/5609/2770/10488/2778/10000/208/5291/51289/5331/6019/2775/1906/2885/112/2771/4312/10681/2790/90993/2792/9586/1432/1285/5602/4792/5594/59345/108/468/5568/114/4893/5605/1910/117579/…	127
hsa04150	mTOR signaling pathway	153/7724	156/8190	0.019648	0.109046	0.0806601	51384/7471/1857/5293/2535/8323/64900/10325/8131/6195/1977/79726/6197/7132/84219/2932/27330/1975/8322/5295/5582/529/253260/11211/1856/55615/220441/6249/8326/7855/7248/7474/6199/9681/5595/6196/5894/54361/10542/64121/7477/81617/5604/525/5579/92335/58528/8503/51606/3265/5563/96459/387/7479/64223/4041/10000/208/4040/6520/5291/51719/54541/55437/7482/51382/253314/84335/64798/2885/523/79109/1978/9675/748…	153
hsa00564	Glycerophospholipid metabolism	98/7724	99/8190	0.0205964	0.11157	0.0825272	5322/5320/151056/162466/56994/1040/64900/10908/5321/84803/54979/55326/23646/150763/54675/2819/391013/8398/26279/8681/55224/11313/8525/8612/8611/11145/3931/8526/23659/100137049/43/10555/64850/1103/8399/196051/79143/122618/10390/85465/64600/2820/154141/1606/10434/30814/1119/1608/23761/10423/55500/1120/23175/56895/81490/375775/9468/79888/56261/10162/84647/255189/254531/1607/81579/23171/253558/123745…	98
hsa04810	Regulation of actin cytoskeleton	223/7724	229/8190	0.0211556	0.11157	0.0825272	5154/10451/4478/4627/3683/8826/5293/6548/3690/8395/6714/7114/3696/624/653857/4638/60/5155/5880/10627/103910/3672/729/2934/1399/87/3675/54961/27006/727/10096/57121/3681/56924/3678/3689/3679/5295/3684/2335/3645/3695/3655/2261/22808/3685/3071/8516/29895/3687/1073/6237/5500/7852/2263/9475/3827/5879/7410/54434/1902/1131/2252/5595/2255/5894/1730/8394/7430/5604/375189/54776/9138/8503/91807/3688/10458/22…	223
hsa05203	Viral carcinogenesis	199/7724	204/8190	0.0217884	0.11157	0.0825272	841/5293/6714/1234/7529/718/3718/6777/1960/4055/8345/9759/3107/2934/3133/7533/87/8347/121504/6850/5295/6672/3249/387332/6774/3665/1233/7534/6908/9519/8379/1026/4067/5966/836/7185/51564/3572/8900/10013/1232/440689/5879/7874/5595/2968/2033/5902/1027/7532/9134/5366/896/3066/8339/2648/3725/9261/27044/8359/64764/1021/8503/4790/5567/85236/3265/10488/5315/7337/387/8970/5610/2961/8342/2965/5291/8360/1001…	199
hsa04927	Cortisol synthesis and secretion	65/7724	65/8190	0.0218576	0.11157	0.0825272	196883/779/778/185/57552/5087/1583/8913/64764/775/3709/5567/8912/10488/3164/3710/6770/2778/5331/2767/112/6667/90993/3283/9586/8911/5151/8622/108/468/5568/1584/4158/114/3284/113/5332/190/3776/111/3949/56246/2776/109/1589/2516/23236/776/84699/1386/115/3739/1586/107/148327/3708/5443/5330/84876/1388/1385/3777/183/949/5566	65
hsa03015	mRNA surveillance pathway	96/7724	97/8190	0.0227832	0.11157	0.0825272	11051/5522/5411/140886/22794/8106/51585/23283/2107/80336/4116/26019/28227/10921/1477/5516/5500/79869/80335/23049/29894/7919/22985/81608/65110/53918/64895/645974/10767/23293/10482/392517/4686/55844/5520/8732/9775/55012/56001/10898/5525/8761/5529/10189/100529063/728343/642843/84305/10250/10978/55308/5518/55916/29107/5523/5528/23381/4440/53981/56000/124540/10284/22916/5515/5519/2733/26528/65109/5521…	96
hsa04070	Phosphatidylinositol signaling system	96/7724	97/8190	0.0227832	0.11157	0.0825272	5293/1040/805/8395/3613/80271/3635/8776/5295/5582/55300/8525/22876/3707/5297/3612/8526/8897/8821/3631/8394/91860/5579/8503/3709/3628/5333/5289/3710/5291/1606/4534/9108/5336/55529/5331/1608/10423/8898/84812/5728/89869/3633/3636/5286/810/54928/5298/5335/9107/55613/51806/113026/5332/1607/90809/64419/51447/3705/200576/5287/9162/163688/9677/23236/9110/5288/55361/4952/23396/1609/5290/51196/8760/64768/2…	96
hsa04666	Fc gamma R-mediated phagocytosis	96/7724	97/8190	0.0227832	0.11157	0.0825272	10451/5293/7408/2213/8395/5321/653857/7454/5880/3635/2934/1399/10096/6850/8398/5295/5582/5580/8681/2215/8612/8611/4067/1073/2214/4082/5879/7410/6199/5595/5894/100137049/8394/5604/273/382/5579/8503/3055/10000/208/5291/56848/5336/8877/8853/8936/55616/5594/57180/50807/3636/10810/5581/5335/1398/255189/1793/10552/27040/123745/81873/207/10097/23396/85477/5290/998/10095/1785/7409/8605/10092/3984/5578/61…	96
hsa05215	Prostate cancer	96/7724	97/8190	0.0227832	0.11157	0.0825272	5154/5327/5293/842/5155/4318/5328/6932/2932/7184/5295/4314/6935/3645/83439/1026/2308/2263/5595/6934/2033/5894/1027/9134/2064/5604/64764/3320/8503/4790/3265/6692/7850/10488/7113/596/1950/10000/208/5291/1499/4824/8517/2885/4193/7157/90993/673/5728/9586/367/354/4792/5594/468/5170/369/4893/1869/2950/5605/3551/1147/3845/3630/2475/7039/5970/1017/3326/2260/1956/595/207/56034/84699/5156/5290/6716/51176/1…	96
hsa05414	Dilated cardiomyopathy	95/7724	96/8190	0.0239591	0.115629	0.085529	196883/779/7170/3690/1674/3696/60/3908/6547/778/3672/59283/3675/489/3678/3679/7042/3695/3655/6262/5350/786/3685/7171/8516/4625/153/782/6543/7134/775/7273/3688/781/5567/3680/1756/2778/7139/7168/783/785/1605/6445/112/7137/93589/59285/488/284217/6546/2010/3694/108/6443/6444/70/5568/114/113/7040/111/7169/109/10369/71/4000/3676/776/8515/3674/4633/4607/115/3673/4624/784/3691/487/10368/59284/55799/9254/…	95
hsa04213	Longevity regulating pathway - multiple species	62/7724	62/8190	0.0260938	0.12354	0.0913808	196883/5293/3170/23411/6648/5295/3310/51422/847/2308/53632/6199/3066/8503/5567/3265/5563/81570/3303/5565/10000/8471/208/5291/84335/112/3065/8660/108/5568/114/4893/3305/5571/113/3845/9474/3630/2475/5562/111/3667/3643/109/207/115/5290/5564/1410/3304/57521/6647/2309/1979/6198/107/3312/5296/3306/3480/3479/5566	62
hsa05226	Gastric cancer	146/7724	149/8190	0.0263403	0.12354	0.0913808	51384/7471/1857/5293/2535/8323/1495/10023/4233/6464/8312/27006/6932/2932/23401/8322/5295/7042/11211/7048/10912/83439/1856/1026/4292/1643/2263/8326/7855/7474/6199/2252/5595/6934/2255/5894/54361/4609/1027/9134/29119/7477/4087/2064/5604/6257/4089/8503/25759/3265/9965/7479/596/4041/1950/10000/208/4040/8817/5291/1499/7482/2885/7481/7157/7475/4088/2247/2248/673/2249/324/1496/26291/5594/7483/8313/1452/1…	146
hsa05130	Pathogenic Escherichia coli infection	192/7724	197/8190	0.0282097	0.13047	0.0965069	644150/4627/841/27128/137075/842/6714/653857/9265/60/6188/356/5777/837/51807/9871/25/840/4542/10096/57121/84790/7132/64005/4641/7277/9076/9071/4615/55971/10972/5603/9368/8737/4645/3059/114609/10376/7009/114548/7100/836/24146/3071/4643/51135/9475/3576/5879/4690/8743/7099/1902/5595/4671/10802/4430/10382/3725/9826/7430/382/9138/4790/3688/10458/84617/203068/375/4640/5062/54205/387/3654/23365/6885/464…	192
hsa04970	Salivary secretion	91/7724	92/8190	0.0292761	0.130805	0.096755	362/196883/805/6548/5554/6263/3783/55503/5582/482/4069/476/820/23439/1131/153/492/5592/154/491/91860/5579/483/5593/148/3709/280/5567/3347/1755/480/3710/2778/6558/653247/5331/4589/276/112/6779/6522/2977/108/810/5568/278/1472/3346/114/277/952/279/478/2982/1469/113/1470/727897/51806/5332/54831/5542/111/1473/6844/2776/109/163688/23236/5555/493/2983/115/146/477/147/4842/5578/486/107/155/3778/808/683/3…	91
hsa05222	Small cell lung cancer	91/7724	92/8190	0.0292761	0.130805	0.096755	5293/842/3913/3908/10319/1284/3675/5295/2335/4843/3912/3655/10912/1026/3685/3910/1643/836/7185/3915/1287/4609/1027/9134/3914/6257/1021/8503/4790/3688/598/54205/3918/596/10000/22798/79444/208/5291/7709/331/8517/7189/329/3909/1164/317/7157/2272/7187/5728/1285/4792/284217/1030/1019/4149/1163/1869/3551/9618/3911/1147/51426/5970/1017/1288/6256/7188/595/207/5747/3674/7186/3673/5290/581/578/1647/5743/18…	91
hsa04935	Growth hormone synthesis, secretion and action	118/7724	120/8190	0.0294607	0.130805	0.096755	196883/779/5293/8835/6464/8651/6777/778/5449/1399/2932/9021/5295/5582/6772/3717/5603/6774/6755/3486/5595/2033/5894/5604/5579/64764/775/8503/25759/3709/5567/3265/112609/2770/10488/3710/2778/10000/8471/208/2690/5291/5608/5336/5331/2767/2693/2885/112/2771/6752/8660/90993/4214/9586/1432/5602/5594/2692/6751/108/468/2688/5568/1442/2689/114/4893/1443/5605/5335/399694/1398/5600/113/3845/5332/2475/2773/11…	118
hsa05165	Human papillomavirus infection	320/7724	331/8190	0.031025	0.134709	0.0996424	51384/7471/1292/841/1857/1277/5293/2535/6696/8323/5522/9641/3659/9794/3690/3913/3696/10134/472/1101/256076/3993/3908/356/10319/7450/3672/4600/7422/1284/8638/3107/3133/3675/8312/7060/5590/5734/6932/7132/2932/3678/55502/1311/8322/3679/5295/26508/6772/529/28227/9368/11211/387332/1278/2335/3912/3695/6908/9519/3655/3381/182/83439/5516/1856/1293/1026/3685/3910/836/2308/7143/8516/8992/8326/533/7855/8900…	320
hsa04370	VEGF signaling pathway	59/7724	59/8190	0.0311489	0.134709	0.0996424	5293/842/4846/6714/5321/5880/9047/7422/3315/5295/5582/8681/5603/5533/4773/5879/3791/5595/5894/100137049/9261/5604/5579/8503/25759/3265/10000/208/5530/5291/56848/5336/8877/5532/1432/5594/5535/4893/5605/5335/5600/3845/255189/5829/123745/207/5747/5290/5534/6300/998/5743/8605/5578/7867/5296/5881/283748/572	59
hsa05213	Endometrial cancer	58/7724	58/8190	0.0330424	0.141065	0.104344	5293/1495/842/8312/6932/2932/5295/10912/83439/1026/4292/1643/5595/6934/5894/4609/29119/2064/5604/8503/3611/3265/1950/10000/208/5291/1499/2002/2885/7157/673/5728/324/1496/5594/8313/5170/369/4893/5605/3845/51426/1956/595/207/5290/999/581/51176/578/1647/2309/6654/10297/4616/5296/6655/572	58
hsa05017	Spinocerebellar ataxia	140/7724	143/8190	0.0337187	0.141492	0.10466	5293/55062/5687/56652/2903/10105/5701/489/115209/5704/2906/9861/5295/5582/10524/387332/6908/9519/10528/3748/4287/23369/7416/7494/291/5706/5709/4654/6261/5579/7222/5690/8503/3709/773/2902/9698/116443/54205/293/29982/5688/5692/5289/3710/5715/10000/5684/208/6712/5291/5331/10213/1600/4976/5719/11047/2904/26100/6667/83447/3752/25814/5602/5693/441925/5717/11317/488/23152/5702/2081/5691/30849/5685/92552…	140
hsa04211	Longevity regulating pathway	88/7724	89/8190	0.033992	0.141492	0.10466	10919/196883/5293/23411/1977/9365/6648/5295/51422/847/2308/7248/53632/6199/64764/8503/4790/27244/5567/3265/10645/5563/814/10488/5565/10000/8471/208/5291/253314/84335/79602/1978/112/8660/7157/90993/9586/108/468/5568/114/4893/9470/5571/8408/113/3845/9474/3630/2475/5562/60673/111/5970/3667/3643/109/83667/9776/207/84699/1386/10891/115/5290/5564/581/57521/79813/2309/6009/6198/107/148327/9821/5468/5296…	88
hsa05417	Lipid and atherosclerosis	209/7724	215/8190	0.0344842	0.141768	0.104864	10451/841/5293/9641/805/842/5451/4846/6714/958/356/4318/637/2920/959/6352/6648/815/840/3383/3308/7132/2932/4688/7184/5295/4615/4314/3310/6347/3717/5603/6774/3665/1535/114609/817/5533/114548/338/4067/4773/2919/836/51135/1573/1549/9475/1965/3576/6403/5879/8743/7410/7097/7494/7099/5595/23643/5906/3444/3593/3725/91860/6257/3446/9138/3320/8503/4790/598/10333/3265/5609/29110/3303/54205/3329/387/5452/46…	209
hsa01212	Fatty acid metabolism	57/7724	57/8190	0.0350507	0.14234	0.105287	33/10449/54898/64834/2180/27349/31/3030/2181/1376/1962/23205/54995/9524/9200/51102/51703/81616/1375/109703458/79966/5538/51495/36/7923/9374/3032/3033/2182/6319/23305/9415/60481/79071/38/1892/3295/3992/126129/6785/37/6342/51144/83401/197322/39/34/84869/2194/1374/401494/35/51/30/8310/79993/201562	57
hsa04512	ECM-receptor interaction	87/7724	88/8190	0.0357202	0.143311	0.106005	1292/255743/1277/6696/3690/6385/3913/3696/1101/256076/3908/10319/7450/3672/1284/9899/3675/7060/3678/1311/3679/1278/2335/3912/3695/3655/3381/1293/3685/3910/7143/8516/1758/3915/1287/2814/3914/7448/3688/1280/3680/3918/1291/22798/1605/948/3909/3161/2812/1285/9900/284217/3694/1834/51206/3911/80144/1297/63923/2815/375790/1288/1299/158326/5649/2811/1298/7059/22987/7148/3676/8515/961/3674/3673/3691/1286/…	87
hsa01200	Carbon metabolism	113/7724	115/8190	0.0367958	0.145661	0.107744	4199/2806/4190/2539/387712/2645/2203/5162/5634/8801/6391/847/7167/8802/84076/2023/4967/5313/54363/51179/283871/5096/3098/22934/8789/2731/6390/2027/6392/5315/441531/5213/1738/80201/3417/2746/6470/84693/230/2098/1737/5631/48/5224/84532/5091/6389/5226/29968/229/26227/1743/4200/5161/5232/3420/414328/7086/137362/221823/10873/5160/1373/6120/84706/6888/25796/50/2026/26275/729020/4329/38/9563/2747/1892/5…	113
hsa04340	Hedgehog signaling pathway	56/7724	56/8190	0.0371808	0.145661	0.107744	132884/5727/1454/23432/2932/409/64399/64750/1954/1456/2735/374654/57467/8452/339745/23288/50846/2736/5567/596/4036/102800317/8643/1453/1452/84455/157/5568/8405/84976/730094/6469/23291/2619/57758/8945/408/3549/595/57154/8454/53944/91653/51684/11127/156/55733/122011/2737/1455/50937/2121/23295/894/6608/5566	56
hsa04670	Leukocyte transendothelial migration	112/7724	114/8190	0.0384554	0.148903	0.110142	10451/4478/3683/5175/83593/5293/7408/137075/1495/3702/60/4318/5880/10627/103910/87/1003/3383/2185/6494/4688/3689/9076/5295/5582/9071/5603/3684/1535/24146/29895/7852/9475/399/5879/4313/7410/7294/5906/29119/7430/5579/83700/8503/3688/11069/2770/387/4689/58498/5291/1499/6387/5336/49861/644672/2909/2771/10411/1366/1365/1432/53842/394/1496/93408/9074/149461/58494/4636/5781/100132463/9075/26285/9073/533…	112
hsa04915	Estrogen signaling pathway	135/7724	138/8190	0.0412898	0.152656	0.112918	196883/5293/2289/805/4846/6714/6464/4318/7184/25984/5295/5580/3310/1509/4313/5595/5894/4988/9568/2852/3725/5604/3875/91860/7031/64764/2550/3320/8503/25759/3709/5567/8202/3265/2770/10488/3303/596/3710/2778/10000/208/5291/3881/3857/3872/5914/5331/2775/2885/3859/3883/112/8689/9166/2771/6667/90993/5241/3860/9586/5594/8648/3866/108/468/810/5568/342574/2288/147183/8687/114/3880/353288/4893/3858/8688/38…	135
hsa01232	Nucleotide metabolism	84/7724	85/8190	0.0414254	0.152656	0.112918	1890/1635/122481/122622/205/129607/2987/51816/26289/2766/7378/3251/5167/4907/51251/1854/84284/144811/4831/159/50484/4830/953/8623/100/102157402/978/955/56474/204/203/83549/1633/377841/271/284958/132/51292/654364/100526794/4832/5169/221264/353/51020/1503/3704/84618/29922/79077/56953/7498/8833/6241/115024/51727/30833/1716/6240/7084/270/22978/124583/151531/1841/7083/4833/3614/50808/10201/272/158/961…	84
hsa04012	ErbB signaling pathway	84/7724	85/8190	0.0414254	0.152656	0.112918	5293/2069/6714/6464/6777/868/25/815/1399/56924/2932/5295/5582/817/1026/27/374/4690/6199/5595/5894/4609/1027/3725/2064/5604/5579/8503/25759/3265/2065/5609/5062/685/1950/3084/10000/208/5291/818/5336/10718/2002/2885/57144/1978/673/5063/5602/867/5594/2066/106821730/369/4893/5605/5335/399694/1398/3845/2475/7039/53358/1956/207/5747/5290/2549/145957/5578/6198/6654/6776/8440/6416/5599/1839/5296/6655/816/…	84
hsa03460	Fanconi anemia pathway	54/7724	54/8190	0.0418363	0.152656	0.112918	79728/2189/5980/11201/4292/84126/5429/6119/197342/80010/378708/6118/80233/2177/2176/2072/55120/2187/5888/116028/9894/353497/29935/2175/545/55215/675/79008/83990/29089/51426/2067/5889/7398/548593/146956/201254/100526739/80198/3280/22909/91442/672/6117/8940/57697/5395/84464/2188/2178/641/57599/51455/7156	54
hsa04668	TNF signaling pathway	110/7724	112/8190	0.0419876	0.152656	0.112918	3627/843/841/1051/5293/197259/3659/3600/8986/4318/2920/6352/11035/840/3383/7424/7132/602/7133/9021/5295/4314/8809/6347/5603/8737/182/7128/2277/6364/2919/836/7185/4323/5595/3725/5604/1326/64764/8503/4790/5609/9252/4049/10059/10488/1435/10000/208/5291/6885/5608/8517/329/1906/64127/6376/90993/8772/6374/7187/9586/1432/5602/4792/5594/257397/468/1437/3551/9530/4217/192111/5600/1147/3456/153090/5970/902…	110
hsa04630	JAK-STAT signaling pathway	158/7724	162/8190	0.0421753	0.152656	0.112918	5154/3566/6778/1489/3560/5293/8835/3600/3595/9180/1441/8651/3718/5155/5777/6777/3561/3575/1154/9021/5618/5295/58985/3587/6772/53832/3717/316/6774/3598/1026/3458/4352/29949/1270/9063/3572/1438/3588/3460/3578/3559/2033/5894/5292/4609/6773/3444/896/7066/6775/3568/3574/3593/3446/3570/3581/8503/598/51561/3594/3265/85480/53833/596/3452/1950/10000/208/2690/3953/5291/338376/9466/50616/10379/2056/122809/2…	158
hsa05135	Yersinia infection	134/7724	137/8190	0.042981	0.1539	0.113838	10451/644150/8935/5293/925/926/8395/6714/653857/60/7454/5880/6195/3937/1399/6197/10096/2185/2932/27330/3678/5295/4615/920/6347/5603/2335/114548/7535/4773/51135/64283/9475/3576/5879/7410/7099/5595/6196/3725/4210/8394/5604/382/9138/8503/4790/3688/10458/5609/29110/8874/387/3654/23365/10000/208/5291/6885/5608/7456/2533/147179/8517/7189/63916/1432/5602/4792/5594/57180/5586/9815/4775/3558/5605/3551/927…	134
hsa04060	Cytokine-cytokine receptor interaction	285/7724	295/8190	0.0465234	0.163581	0.120999	3552/3627/3566/8740/1489/3560/9518/51330/4283/6373/93/10803/56477/8764/3600/3595/9180/246778/1234/9547/268/1441/958/8793/8794/356/23765/3561/8741/2920/4055/959/729230/6352/3575/23495/7132/7133/1230/5618/2661/7042/650/10663/2829/58985/4982/3587/920/8809/970/53832/6347/6846/23529/1233/5196/3598/1236/7048/9173/6364/4050/84818/90/3458/4352/2919/8808/29949/1270/7293/7852/657/3572/1438/1232/3576/3588/8…	285
hsa04144	Endocytosis	243/7724	251/8190	0.0467084	0.163581	0.120999	644150/3560/27128/64411/8395/64145/6714/1234/653857/9265/23550/3561/5867/868/3107/3133/858/7251/51019/5590/10096/30844/163/29082/30846/729092/409/84440/6455/253725/3310/64750/830/9146/832/57403/51100/7048/3482/2261/387680/84364/116983/119016/7852/1173/2263/7037/2352/26119/254122/60682/829/3579/440073/55738/414189/9829/3559/22905/8218/79643/91782/4087/3800/8394/273/382/56288/857/1175/3798/116987/1…	243
hsa04217	Necroptosis	155/7724	159/8190	0.0471584	0.163581	0.120999	3552/6778/841/197259/94239/5321/356/3718/6777/637/1540/11035/815/7132/29082/6772/8681/5836/3717/55766/823/6774/8737/3146/817/5481/7128/114548/9825/3458/8878/81858/246/7416/8743/291/7099/3460/6773/3444/100137049/6775/317772/79643/91782/3446/3320/8337/10059/293/6609/5610/596/3452/824/8334/818/5478/331/83740/90865/10379/2746/128866/329/8795/2495/27183/8772/51652/3454/51510/8969/83447/57132/5602/3716…	155
hsa04913	Ovarian steroidogenesis	51/7724	51/8190	0.0499321	0.168116	0.124353	122970/196883/5321/1545/10965/8681/1583/1573/641371/240/100137049/2488/5567/6770/2778/1543/3972/112/3292/3283/9210/108/3294/51478/5568/114/8644/3284/113/654/3630/255189/111/3949/123745/3643/109/1588/2492/115/5743/1586/8605/107/3973/3480/283748/3479/949/1081/5566	51
hsa03013	Nucleocytoplasmic transport	106/7724	108/8190	0.0499804	0.168116	0.124353	23534/5411/22794/6613/6612/10073/4116/26019/3841/10921/9818/5903/9631/57510/3837/55746/7919/22985/65110/10762/23039/23511/11097/23214/79711/10482/392517/7329/79902/23165/4686/402569/59343/25909/4928/8021/57187/3838/51068/9775/56001/7514/57122/51808/79023/11260/10189/100101267/5905/6396/84321/728343/1434/84305/51194/53371/10250/23636/91181/9688/10526/55308/55916/29107/23225/8480/55161/81929/8563/9…	106
hsa04931	Insulin resistance	106/7724	108/8190	0.0499804	0.168116	0.124353	5293/4846/5509/376497/2997/6195/5106/32/6197/5590/7132/2932/27330/9021/5295/5580/51422/5836/6774/8473/9882/57818/2308/5500/5507/2673/53632/5770/11000/6199/6196/1375/51085/5579/64764/8503/4790/11001/6513/5563/10488/200186/5565/10000/208/5291/10062/57761/948/6514/8660/5792/90993/90673/5465/5728/9586/10998/5602/4792/5834/6517/2998/5581/5170/5781/9945/5506/3551/5571/3630/2475/5562/5588/5970/3667/3643…	106

## Sheet: GO
Supplementary Table 4
Enrichment analysis results of Subtype 2 vs Subtype 1
ONTOLOGY	ID	Description	GeneRatio	BgRatio	pvalue	p.adjust	qvalue	geneID	Count
BP	GO:0010817	regulation of hormone levels	492/16611	496/18800	8.06434e-22	5.13698e-18	3.42437e-18	8228/259307/151056/93/3077/6696/174/30812/54884/64377/5947/9607/640/2822/1889/7276/140606/27122/7226/10269/56729/10404/55636/406/3170/1545/127/7447/91355/6777/7432/8111/4826/5106/6352/80024/185/2304/6869/55503/6865/9249/388581/2645/339761/59342/1522/338557/8398/220/8322/56603/2661/216/650/415116/4825/8673/8630/3717/3249/1946/81555/134/1803/1733/4843/1583/6755/5007/340665/476/1514/1268/23428/57818…	492
BP	GO:0048568	embryonic organ development	444/16611	449/18800	2.6006e-18	8.28292e-15	5.52149e-15	3213/51384/5154/5919/10413/115908/129880/7471/79728/3214/7703/841/3215/1051/2535/5727/1969/8323/3199/2202/7262/55584/5308/7026/1889/84678/860/2487/55636/10253/3217/5155/3212/3227/23242/4188/7422/1305/677/2304/7003/286204/7005/57216/57453/3198/220/64220/2623/9021/2296/5013/8463/7042/3142/348093/55084/55773/29072/80184/8320/3249/5311/9368/5087/187/3203/1954/5090/6935/55081/7048/6262/639/1856/3491/2…	444
BP	GO:0007409	axonogenesis	424/16611	430/18800	2.27031e-16	4.82064e-13	3.21349e-13	59352/4983/214/29882/6696/5727/7408/1969/3199/4781/8577/5015/6477/6683/1889/3913/7101/60/389549/6586/81565/4099/8482/140578/3908/4884/51393/9211/23242/5880/4744/1627/23129/1400/7504/7422/1826/51265/25/4684/1943/7224/10211/8633/57408/137970/170302/22854/57453/2932/6900/494470/6091/682/51199/9353/4825/10678/55201/139065/1948/2043/219699/1946/11313/1954/10716/2335/11344/6049/9856/6324/133418/53942/9…	424
BP	GO:0050808	synapse organization	413/16611	419/18800	7.82792e-16	1.2466e-12	8.30996e-13	4983/10288/84885/643866/7162/29882/51225/54209/64101/22943/5552/11346/83992/2213/1134/3913/60/9231/718/257194/4884/6547/4744/1627/23129/23284/5021/712/23181/1826/1981/25/23316/27286/124925/79953/1399/8496/87/55209/3675/831/22854/4076/6900/55906/78999/63827/3587/139065/84062/1948/2043/1946/3684/22859/4593/7534/53942/9723/11079/6405/4131/22871/27067/23237/347902/2047/627/4776/9419/5802/84623/55619/…	413
BP	GO:0001701	in utero embryonic development	382/16611	387/18800	3.18283e-15	3.97359e-12	2.64884e-12	10413/4627/79728/7703/1281/841/9113/84525/1051/5727/9508/8061/30812/7262/7026/4846/10443/56949/285855/55636/81565/5155/57498/1627/4848/4188/23764/7422/9871/729/677/154197/8312/55172/3714/727/85451/5704/788/83605/2530/26469/2623/284/9021/2296/650/343263/57493/29072/8320/10161/5311/55224/7048/2627/4695/80312/54663/639/7014/3491/4245/338/2294/84871/90/10653/7075/26259/3481/4643/1376/7004/2263/8846/6…	382
BP	GO:0044089	positive regulation of cellular component biogenesis	483/16611	494/18800	3.74278e-15	3.97359e-12	2.64884e-12	4478/7471/115362/3958/5899/23075/7162/84722/55062/7408/1969/2242/57535/11346/4233/6714/6385/472/8477/8631/9231/6188/81565/23242/5880/4733/55612/637/4848/5021/1191/51429/7422/1981/25/23316/29109/57472/27286/79953/7251/10211/6869/1003/10096/23379/64581/2185/143098/6850/2932/146206/9788/9076/5345/9908/5295/51199/79998/4615/55971/23433/80063/10142/4314/253725/139065/9873/253260/9146/9662/1946/7453/50…	483
BP	GO:0023061	signal release	442/16611	451/18800	9.53377e-15	8.67573e-12	5.78335e-12	3552/93/3077/6696/9607/640/2822/140606/55784/7226/5321/56729/55636/406/26258/3170/7447/91355/7432/5021/8111/4826/5106/6352/8564/80024/815/185/8676/6869/91683/55503/6865/388581/2645/6850/1137/338557/8398/2932/5023/10859/8322/2661/5582/415116/4825/8673/84062/3717/1946/3737/6857/134/4843/6755/5007/3060/9536/23621/9498/1268/63908/22871/57818/695/56670/4067/2281/136/3458/25874/9463/51167/5025/6833/312…	442
BP	GO:0031331	positive regulation of cellular catabolic process	440/16611	449/18800	1.18013e-14	9.39676e-12	6.26399e-12	10346/4478/5899/221662/54209/1263/55062/57535/2822/29763/23034/56478/79443/1075/57817/195827/57690/10134/472/3184/10206/55294/7538/26086/8131/6613/11236/1454/23411/3162/4848/9567/51257/8570/1191/51429/79589/2819/149628/160418/85363/677/57472/5701/154197/6737/8312/11040/58476/2185/2926/10492/6832/5704/9604/117854/54542/8975/2932/51343/10140/127544/22894/7133/26058/10524/5347/149041/5580/10475/1022…	440
BP	GO:0010498	proteasomal protein catabolic process	484/16611	496/18800	1.6882e-14	1.13783e-11	7.58494e-12	4983/115290/57805/3077/54209/1263/23429/25937/55741/162517/127733/11011/5687/57542/6477/3429/10134/10206/55294/23607/406/64285/6613/84417/11236/1454/23411/55527/1191/10956/55757/6048/819/160418/5701/7466/8312/27074/5704/9604/26046/8975/2932/51343/127544/143941/25852/26270/409/9861/7184/5582/10524/5347/6599/9325/92369/64750/10475/10221/8473/79139/4092/493829/4189/57095/56893/7327/11337/11345/7353/…	484
BP	GO:0061564	axon development	468/16611	479/18800	1.78624e-14	1.13783e-11	7.58494e-12	59352/4983/214/29882/6696/5727/7408/1969/1495/3199/4781/8577/5015/6477/6683/1889/3913/7101/60/389549/6586/81565/4099/8482/140578/3908/4884/51393/9211/23242/5880/4744/1627/23129/1400/7504/7422/1826/51265/25/4684/10100/1943/7224/10211/8633/57408/137970/170302/22854/57453/2932/6900/494470/83999/2896/6091/682/51199/9353/4825/10678/55201/139065/3717/1948/2043/219699/1946/11313/1954/10716/2335/11344/29…	468
BP	GO:0090066	regulation of anatomical structure size	475/16611	487/18800	4.24141e-14	2.45616e-11	1.63731e-11	10451/4478/51520/2730/23075/9113/29882/2643/11151/6696/10723/7408/23645/5910/54942/1889/4846/7114/2039/624/93663/83547/81565/7454/4099/8482/51393/822/1627/7504/5021/3672/358/51429/7422/1826/3575/51265/25/6648/2934/7224/185/3783/6869/84561/65267/54961/2185/59342/8398/2932/6900/5023/146206/1311/2702/5345/2296/55971/9353/3274/4825/5580/253725/1621/9873/91663/253260/830/9368/832/1946/361/57403/1954/7…	475
BP	GO:0016570	histone modification	481/16611	494/18800	1.05708e-13	5.1797e-11	3.45285e-11	51111/4837/10919/5253/7703/54799/29943/57325/25862/84525/79858/94104/23429/158880/80314/26122/5931/284058/79697/55693/8986/6877/84678/23030/10933/472/5896/10269/60/27097/23411/84289/55167/4302/9759/54904/7994/7422/51200/54790/55904/6688/122953/55209/7469/54554/84108/9733/9862/55352/8520/2139/57459/11108/23067/56970/51720/51043/3054/6944/63976/7468/10524/51780/4300/5580/29072/26038/3717/57634/8473…	481
BP	GO:1901361	organic cyclic compound catabolic process	481/16611	494/18800	1.05708e-13	5.1797e-11	3.45285e-11	6999/259307/3669/26002/4939/1890/60489/3081/2184/221662/51302/6696/9641/23034/56478/23185/57690/472/115572/3184/6556/1806/7538/22794/7432/3162/4848/162989/200316/9567/23098/1775/10949/8570/259/6039/1774/8564/8241/54790/677/57472/154197/7533/2053/27443/2926/10492/1776/57060/6832/65080/22882/54542/2107/10140/51538/22894/7133/51816/26058/11164/200315/6036/4615/80153/4116/149041/5580/26019/8630/1621/…	481
BP	GO:0010038	response to metal ion	346/16611	351/18800	1.84606e-13	8.2772e-11	5.51768e-11	3552/5176/4499/445/84557/841/5359/8826/3077/1728/805/2822/57103/241/842/57817/2039/366/7226/3184/4205/4884/4318/10105/2354/4547/3162/8904/6263/6279/4489/2539/358/8437/7018/6648/3485/4496/553115/26149/91683/55503/2185/29957/2203/4493/3736/3208/25932/9076/682/144402/140576/4982/5311/10058/1800/6857/817/847/23621/311/5516/6262/9633/84329/22871/3707/56670/7220/4776/1261/836/5025/6833/2696/246/7037/19…	346
BP	GO:0051052	regulation of DNA metabolic process	460/16611	472/18800	1.94911e-13	8.2772e-11	5.51768e-11	51111/5570/10919/6282/83666/6778/81931/54799/3178/3005/7490/2069/158880/54617/115004/80314/26122/57103/55693/6714/10933/472/54891/3184/10269/958/60/11177/6188/54537/1545/7454/23126/10575/57695/5155/23411/84289/8741/64210/3575/6688/3001/7486/2185/2139/51720/25792/6944/5514/8658/409/146059/5582/7468/10524/80169/5983/4880/5580/7644/29072/57634/3146/23529/56893/25849/23347/3060/9767/64094/1161/79915/…	460
BP	GO:0061458	reproductive system development	426/16611	436/18800	2.75955e-13	1.09864e-10	7.32369e-11	3552/5154/5176/150921/7130/841/1051/6696/5727/7490/174/8061/2069/30812/1495/51665/7262/9985/7026/4846/101927581/6714/3696/9820/472/268/56729/718/6586/55636/1545/9510/5155/5777/6777/23411/4188/63951/23598/7422/677/1399/5324/2189/11144/64220/2623/9021/8322/409/5618/2296/2661/682/7042/9353/5806/7022/29072/8320/5311/400629/55224/2627/317719/10371/5926/666/8728/639/3491/9825/1508/10653/10046/836/8751/…	426
BP	GO:0019439	aromatic compound catabolic process	454/16611	466/18800	3.57387e-13	1.31399e-10	8.75924e-11	6999/259307/3669/26002/4939/1890/60489/3081/2184/221662/9641/23034/56478/23185/57690/472/115572/3184/6556/1806/7538/22794/7432/3162/4848/162989/200316/9567/23098/1775/10949/8570/259/6039/1774/8564/8241/54790/677/57472/154197/2053/27443/2926/10492/1776/57060/6832/65080/22882/54542/2107/10140/51538/22894/7133/51816/26058/5445/11164/200315/6036/4615/80153/4116/149041/5580/26019/1621/79048/7378/23644…	454
BP	GO:0048608	reproductive structure development	423/16611	433/18800	3.76455e-13	1.31399e-10	8.75924e-11	3552/5154/5176/150921/7130/841/1051/6696/5727/7490/174/8061/2069/30812/1495/51665/7262/9985/7026/4846/101927581/6714/3696/9820/472/268/56729/718/6586/55636/1545/9510/5155/5777/6777/23411/4188/63951/23598/7422/677/1399/5324/2189/11144/64220/2623/9021/8322/409/5618/2296/2661/682/7042/9353/5806/7022/29072/8320/5311/400629/55224/2627/317719/10371/5926/666/8728/639/3491/9825/1508/10653/10046/836/8751/…	423
BP	GO:0044270	cellular nitrogen compound catabolic process	438/16611	449/18800	3.91929e-13	1.31399e-10	8.75924e-11	6999/259307/3669/4939/1890/60489/33/221662/9641/23034/56478/23185/57690/472/115572/3184/6556/1806/7538/22794/7432/3162/4848/162989/200316/9567/23098/1775/10949/8570/259/6039/1774/8564/8241/54790/677/57472/154197/27443/2926/10492/1776/57060/6832/65080/22882/54542/2107/10140/51538/22894/7133/51816/4357/26058/11164/200315/6036/4615/80153/4116/149041/5580/26019/79048/7378/23644/55149/196513/10921/113…	438
BP	GO:0009991	response to extracellular stimulus	466/16611	479/18800	4.73446e-13	1.47396e-10	9.82558e-11	10631/3552/440738/3627/10919/51520/445/84557/79792/5899/2730/9518/3178/1277/3077/6696/1728/55062/8061/2242/56477/57535/9607/3600/55630/6714/57817/10325/7538/8131/3170/1545/23411/3162/9365/2539/5106/32/79726/4330/1981/6648/3485/3920/83939/389493/643246/2621/2180/7486/115209/432/84219/6494/6900/114789/56603/81788/5582/4982/6772/51422/154743/7378/8473/11337/11345/6935/51100/1535/7048/4852/847/3060/3…	466
BP	GO:0031667	response to nutrient levels	435/16611	446/18800	5.32199e-13	1.47396e-10	9.82558e-11	10631/3552/440738/3627/10919/51520/445/84557/5899/2730/9518/3178/1277/3077/6696/1728/55062/2242/56477/57535/9607/3600/55630/6714/57817/10325/7538/8131/3170/1545/23411/3162/9365/2539/5106/32/79726/4330/1981/6648/3485/3920/83939/389493/643246/2621/2180/7486/115209/84219/6900/114789/56603/81788/5582/4982/6772/51422/154743/7378/8473/11337/11345/6935/51100/1535/7048/4852/847/3060/3291/1268/4131/80763/…	435
BP	GO:0045785	positive regulation of cell adhesion	435/16611	446/18800	5.32199e-13	1.47396e-10	9.82558e-11	259307/3552/1295/10630/10451/3566/10288/255743/8740/6288/916/5329/22915/79679/3956/921/11151/923/84466/3127/941/3122/26191/56477/6504/55423/2013/972/8764/3600/5724/84034/10076/6714/6385/64332/861/2039/3118/472/5896/8631/9265/6188/6239/3170/8651/3718/5155/5777/6777/11221/64926/55612/285613/1960/10326/959/729230/2523/6352/7422/3575/54518/25/140885/3133/3485/1399/10211/3675/5590/3119/23308/5420/3115…	435
BP	GO:1903829	positive regulation of protein localization	435/16611	446/18800	5.32199e-13	1.47396e-10	9.82558e-11	3552/6769/4478/10413/7130/83666/3958/5175/340146/54209/1263/1969/25937/55741/640/2822/9585/6714/10134/7226/23086/54471/55294/51128/23607/10575/7447/5880/89781/11235/8111/4826/5106/84662/5583/149628/79608/56947/10268/7251/3783/3675/65267/5590/2621/23379/7424/388581/2645/8398/2932/163/4641/9747/3689/3208/5295/7042/5347/4825/5580/27237/10972/80184/3717/27429/9662/3684/7984/51100/79778/3059/5007/5481…	435
BP	GO:0042176	regulation of protein catabolic process	387/16611	395/18800	5.8374e-13	1.54934e-10	1.03281e-10	4983/7076/4478/7471/9113/57805/3077/54209/1263/23429/11011/2822/29763/1075/57817/84074/10134/2903/140458/55294/83547/64285/6613/2719/11236/1454/7432/868/51257/1191/51429/79589/819/149628/160418/5701/85407/8312/27074/2185/5704/9604/8975/2932/51343/127544/143941/7133/5582/5347/6599/64750/10221/2043/9146/8473/4092/23450/57095/56893/11337/11345/4843/152503/7128/5887/80279/4946/4287/10533/84871/3458/2…	387
BP	GO:0051047	positive regulation of secretion	297/16611	300/18800	6.27585e-13	1.59909e-10	1.06597e-10	3552/3566/3077/6696/54209/9607/640/2822/9545/5873/5724/6385/7226/5321/23086/23607/56729/2268/7447/7432/5021/8111/6279/4826/5106/358/8564/7251/3783/3916/6869/6865/7424/388581/2645/6850/338557/8398/3689/2623/7042/650/376267/4825/8673/10972/84062/3717/9146/3684/6857/134/1535/5007/5481/22925/9536/9498/1268/22871/4923/136/3458/25874/5025/2181/7442/3123/2696/6717/65018/6659/5029/2668/7097/3624/7494/233…	297
BP	GO:0030900	forebrain development	369/16611	376/18800	6.84148e-13	1.67616e-10	1.11735e-10	23440/4983/7471/10395/63950/1281/4781/22943/5015/5308/7026/6714/84678/56949/7101/389549/55636/26258/81565/8482/57282/5021/170825/2523/358/5449/1943/79809/1399/79648/2618/84376/170302/2932/6900/3736/220/6091/5013/26468/51199/63827/650/9353/6658/482/29072/26038/8320/10579/3361/79048/27429/3684/55695/3251/10716/6935/3912/4852/10371/10215/4192/80055/25911/84623/836/7143/6506/23224/139411/23657/89839/…	369
BP	GO:0046700	heterocycle catabolic process	432/16611	443/18800	7.22271e-13	1.70402e-10	1.13592e-10	6999/259307/3669/4939/1890/60489/221662/9641/23034/56478/23185/57690/472/115572/3184/6556/1806/7538/22794/7432/3162/4848/162989/200316/9567/23098/1775/10949/8570/259/6039/1774/8564/8241/54790/677/57472/154197/27443/2926/10492/1776/57060/6832/65080/22882/54542/2107/10140/51538/22894/7133/51816/26058/11164/200315/6036/4615/80153/4116/149041/5580/26019/79048/7378/23644/55149/196513/10921/11340/1800/…	432
BP	GO:0008544	epidermis development	349/16611	355/18800	9.45889e-13	2.1519e-10	1.43448e-10	3552/51384/5154/10413/2171/9113/9333/6424/6431/5727/1969/2069/8323/22943/3488/5308/23086/10269/7538/7454/11166/55612/1775/5351/23764/4664/54206/1474/5583/677/7251/2304/1475/3714/55283/2125/9119/25932/56603/2296/27152/7042/9368/23596/135228/4665/1294/2627/182/374454/5493/4926/5948/3848/79955/836/2319/3123/8549/3204/81858/7421/2263/3887/9475/2355/613/64072/427/25818/2735/3850/7474/3624/340654/3889/…	349
BP	GO:1903532	positive regulation of secretion by cell	272/16611	274/18800	1.01075e-12	2.22015e-10	1.47998e-10	3552/3566/3077/6696/54209/9607/640/2822/9545/5873/5724/6385/7226/5321/23086/23607/56729/2268/7447/7432/5021/8111/4826/5106/8564/7251/3783/3916/6869/6865/7424/388581/2645/6850/338557/8398/3689/2623/7042/650/376267/4825/8673/10972/84062/3717/9146/3684/6857/5007/5481/9536/9498/1268/22871/4923/136/3458/25874/5025/3123/2696/6717/65018/6659/2668/7097/3624/23332/668/7099/81285/5950/54795/201294/2243/546…	272
BP	GO:0048880	sensory system development	381/16611	389/18800	1.10246e-12	2.34088e-10	1.56046e-10	362/51384/5176/1295/93/170692/7490/1969/30812/2202/10586/57381/348980/5308/84678/3913/7101/57010/718/55636/10253/1545/1421/356/10319/1290/91355/1411/5158/712/646960/7287/7422/1826/8842/1289/1296/64093/286204/2321/6096/10252/22882/51343/220/64220/114789/161742/3208/25932/8322/6247/2296/5316/5961/7042/10218/80184/84062/5087/6774/3684/5090/130557/6597/6935/4211/1641/7048/182/10371/58158/27067/639/57…	381
BP	GO:0051222	positive regulation of protein transport	290/16611	293/18800	1.41194e-12	2.9013e-10	1.93404e-10	3552/340146/54209/1263/55741/640/2822/9585/6714/10134/7226/23086/54471/55294/51128/23607/7447/5880/89781/11235/8111/4826/5106/56947/7251/3783/5590/2621/23379/7424/388581/2645/8398/2932/4641/9747/3689/3208/5295/7042/4825/5580/10972/80184/3717/27429/3684/7984/51100/79778/3059/5007/5481/285966/4946/51614/118424/3458/25874/51366/2181/3123/10399/2696/6717/65018/6659/7855/7097/55696/7099/81285/5950/986…	290
BP	GO:2001020	regulation of response to DNA damage stimulus	245/16611	246/18800	1.62995e-12	3.24461e-10	2.1629e-10	51111/83666/57805/54799/158880/115004/80314/26122/972/57103/842/55693/10933/472/10269/60/6188/51776/54537/7454/23126/23411/637/64210/1191/8444/25/149628/2139/51720/161742/6944/5514/9774/5582/7468/10524/54780/5580/29072/57634/3146/51616/56893/23347/22925/1161/79915/7014/1032/51366/55719/11143/6659/8091/5429/196528/9513/25946/23049/1859/56950/2255/4609/56897/149840/5366/23028/7919/150275/4137/15163…	245
BP	GO:0043010	camera-type eye development	325/16611	330/18800	1.91918e-12	3.63532e-10	2.42335e-10	362/51384/5176/1295/93/7490/1969/30812/2202/10586/57381/348980/5308/84678/3913/7101/57010/55636/10253/1545/1421/10319/91355/1411/5158/646960/7287/7422/1826/8842/1296/286204/2321/6096/10252/22882/51343/220/64220/114789/161742/3208/25932/8322/6247/2296/5316/5961/7042/10218/80184/84062/130557/6597/6935/4211/1641/7048/182/58158/57835/84465/2047/11145/8412/155051/23657/1735/57045/11023/10818/50939/706…	325
BP	GO:0006753	nucleoside phosphate metabolic process	480/16611	495/18800	1.99705e-12	3.63532e-10	2.42335e-10	6999/122970/4837/196883/83666/1890/1635/55711/4199/51268/122481/54898/54209/122622/205/1969/5165/51166/57103/10861/4846/7114/195827/129607/2987/1806/168537/3000/1723/84875/64834/55526/9567/23098/9759/23181/32/8564/2819/136332/387712/79717/80221/2618/27109/2180/2645/2203/26289/3208/11164/26027/10965/84433/23433/2766/4880/5162/641372/5634/51422/134526/7378/6774/8473/3251/31/5167/8801/4843/4907/3735…	480
BP	GO:0009914	hormone transport	287/16611	290/18800	1.99743e-12	3.63532e-10	2.42335e-10	93/3077/6696/9607/640/2822/7276/140606/7226/56729/55636/406/3170/7447/91355/7432/8111/4826/5106/6352/80024/185/6869/55503/6865/388581/2645/338557/8398/8322/2661/415116/4825/8673/3717/1946/134/4843/6755/5007/1268/23428/57818/695/4067/2281/3458/25874/9463/51167/6833/3123/6567/2696/6717/54097/6659/2697/3624/668/5950/54795/240/2243/5467/3172/6934/5894/4986/51714/6616/57555/23409/90007/2852/9024/28667…	287
BP	GO:0150063	visual system development	375/16611	383/18800	2.07772e-12	3.67642e-10	2.45074e-10	362/51384/5176/1295/93/170692/7490/1969/30812/2202/10586/57381/348980/5308/84678/3913/7101/57010/718/55636/10253/1545/1421/356/10319/1290/91355/1411/5158/712/646960/7287/7422/1826/8842/1289/1296/64093/286204/2321/6096/10252/22882/51343/220/64220/114789/161742/3208/25932/8322/6247/2296/5316/5961/7042/10218/80184/84062/5087/6774/3684/5090/130557/6597/6935/4211/1641/7048/182/58158/27067/639/57835/56…	375
BP	GO:0060562	epithelial tube morphogenesis	323/16611	328/18800	2.39587e-12	4.12479e-10	2.74963e-10	3627/10413/115908/129880/7471/10395/255743/1857/5293/2535/5727/7490/7408/1969/30812/8323/4233/9585/57619/6714/6385/84678/9231/10253/3217/2719/91355/23242/23129/7422/25/5420/57216/10252/1522/83605/9788/25932/8463/7798/7042/650/9353/64399/29072/80184/1948/5311/2043/5087/187/6046/79812/1954/55081/7048/3237/9723/340419/6262/4192/1856/2294/4776/90/10653/836/7075/8543/374/3687/8549/7421/9968/7852/388/2…	323
BP	GO:0001654	eye development	371/16611	379/18800	3.16629e-12	5.30771e-10	3.53818e-10	362/51384/5176/1295/93/170692/7490/1969/30812/2202/10586/57381/348980/5308/84678/3913/7101/57010/55636/10253/1545/1421/356/10319/1290/91355/1411/5158/646960/7287/7422/1826/8842/1289/1296/64093/286204/2321/6096/10252/22882/51343/220/64220/114789/161742/3208/25932/8322/6247/2296/5316/5961/7042/10218/80184/84062/5087/6774/5090/130557/6597/6935/4211/1641/7048/182/58158/27067/639/57835/56917/84465/204…	371
BP	GO:0009117	nucleotide metabolic process	472/16611	487/18800	4.30548e-12	6.85647e-10	4.5706e-10	6999/122970/4837/196883/83666/1890/1635/55711/4199/51268/122481/54898/54209/122622/205/1969/5165/51166/57103/10861/4846/7114/195827/129607/2987/1806/168537/3000/1723/84875/64834/55526/9567/23098/9759/23181/32/8564/2819/136332/387712/79717/80221/2618/27109/2180/2645/2203/26289/3208/11164/26027/10965/84433/23433/2766/4880/5162/641372/5634/51422/134526/7378/6774/8473/3251/31/5167/8801/4843/4907/3735…	472
BP	GO:0010638	positive regulation of organelle organization	472/16611	487/18800	4.30548e-12	6.85647e-10	4.5706e-10	3552/5570/5322/4478/5899/23075/5329/84722/3178/54209/55062/7408/2069/2242/57535/11346/4233/6683/79443/6714/6385/84709/472/8477/54471/3184/6188/7454/10575/5155/4318/10105/4733/637/4848/51429/25/79594/2934/29109/57472/56947/6869/5885/2185/79768/8398/2932/146206/9788/2896/5514/8658/5345/9908/51199/79998/55971/80063/10142/253725/9873/253260/27429/9662/51466/7984/6857/51100/389/1236/3397/55604/3059/50…	472
BP	GO:0046879	hormone secretion	278/16611	281/18800	5.64239e-12	8.76635e-10	5.84375e-10	93/3077/6696/9607/640/2822/140606/7226/56729/55636/406/3170/7447/91355/7432/8111/4826/5106/6352/80024/185/6869/55503/6865/388581/2645/338557/8398/8322/2661/415116/4825/8673/3717/1946/134/4843/6755/5007/1268/57818/695/4067/2281/3458/25874/9463/51167/6833/3123/6567/2696/6717/54097/6659/2697/3624/668/5950/54795/240/2243/5467/3172/6934/5894/4986/51714/6616/57555/23409/90007/2852/9024/286676/4087/7425…	278
BP	GO:0097485	neuron projection guidance	234/16611	235/18800	6.19659e-12	9.3789e-10	6.25208e-10	59352/4983/214/5727/7408/1969/3199/4781/8577/5015/6477/1889/3913/389549/6586/8482/3908/9211/5880/23129/1400/7422/1826/4684/1943/8633/57408/137970/170302/57453/6900/494470/6091/682/9353/10678/1948/2043/219699/1946/11313/1954/10716/6324/133418/53942/9723/1947/10371/10570/6405/2041/2047/627/2042/2115/7143/23114/11023/8997/10507/399/2676/2668/5879/7474/151449/8829/1436/54538/6585/1808/9637/23654/3800…	234
BP	GO:0006260	DNA replication	277/16611	280/18800	6.33113e-12	9.3789e-10	6.25208e-10	10919/6282/84268/2069/4781/54617/5931/56652/54891/5937/10269/11177/27343/57695/84289/22944/7486/25792/146059/8208/80169/5983/11198/5980/5422/3060/9767/5000/5428/79915/7014/4784/11201/92675/8412/1325/1854/9188/92667/11143/79892/2735/91607/5429/5981/54921/6119/50484/56897/9134/79913/3980/5763/79960/7528/9416/197342/54465/2736/8607/80010/6749/378708/389643/23063/92797/10926/6418/6118/5426/5930/25439…	277
BP	GO:0007411	axon guidance	233/16611	234/18800	6.99547e-12	1.01275e-09	6.75113e-10	59352/4983/214/5727/7408/1969/3199/4781/8577/5015/6477/1889/3913/389549/6586/8482/3908/9211/5880/23129/1400/7422/1826/4684/1943/8633/57408/137970/170302/57453/6900/494470/6091/682/9353/10678/1948/2043/219699/1946/11313/1954/10716/6324/133418/53942/9723/1947/10371/6405/2041/2047/627/2042/2115/7143/23114/11023/8997/10507/399/2676/2668/5879/7474/151449/8829/1436/54538/6585/1808/9637/23654/3800/2064/…	233
BP	GO:0003002	regionalization	347/16611	354/18800	7.21584e-12	1.02144e-09	6.80906e-10	4223/3213/7471/79728/63950/3214/7703/221833/93/3215/5727/7490/3199/7093/22943/5015/5308/7026/84678/2114/472/389549/718/3170/3217/2719/91355/3212/3227/23242/4188/170825/8553/712/11022/79809/1399/286204/8312/10252/2926/23432/57453/3226/55502/56603/6091/2296/5013/27152/7704/26508/650/64399/4300/8320/5087/3684/3203/1954/5090/3224/10716/55081/3237/340665/10371/6405/1856/80055/2294/128344/23237/25911/9…	347
BP	GO:0048511	rhythmic process	293/16611	297/18800	8.99118e-12	1.24508e-09	8.29986e-10	5176/7130/80045/445/57805/174/2069/9607/5971/4846/6714/7226/268/3184/196/55294/5730/56729/6586/406/26258/1545/9510/6777/1454/23411/1960/4547/90134/5021/5158/8553/5936/6096/83759/2932/8322/409/2661/5582/7042/112464/23239/9353/5806/92369/4841/23596/8473/3737/134/4843/3397/6478/4192/22871/10533/836/10743/10399/5500/2673/9475/5764/4313/4783/3624/10514/7874/153/50865/1859/3172/3062/59338/79365/2033/49…	293
BP	GO:0043588	skin development	292/16611	296/18800	1.00614e-11	1.36365e-09	9.09023e-10	3552/51384/5154/10413/1281/9113/81031/1277/6431/1969/2069/8323/22943/4233/3488/23086/10269/7538/11166/1290/55612/64834/1775/54206/5583/1289/677/7251/2304/50509/1475/3675/2125/9119/25932/1311/9076/56603/2296/27152/7042/23596/135228/1278/10058/2627/51599/3655/182/374454/5493/4926/4050/3848/836/8549/10758/3204/81858/7421/2263/3887/9475/2355/613/427/25818/3850/7474/3624/340654/3889/6939/2252/4831/270…	292
BP	GO:0042445	hormone metabolic process	229/16611	230/18800	1.13596e-11	1.50752e-09	1.00493e-09	8228/259307/151056/3077/6696/174/54884/64377/5947/1889/7276/140606/27122/10269/10404/1545/127/6777/2304/9249/339761/59342/1522/220/56603/216/650/8630/3249/81555/1803/1733/1583/340665/476/1514/1508/1734/195814/6567/2230/9718/1735/51301/90527/83539/6528/5950/5122/6934/59338/1592/54361/10196/51635/64924/706/7367/5125/653/1585/8854/3416/79154/4790/130/1562/2488/54905/53630/5978/10858/8912/2028/6715/3…	229
BP	GO:0022411	cellular component disassembly	446/16611	460/18800	1.36074e-11	1.76897e-09	1.17921e-09	440738/10630/80183/84557/132671/23075/64147/54209/1263/55062/256764/22943/57103/10023/6683/79443/25876/2039/157922/2191/55294/10269/285973/718/81565/4318/822/162989/712/8444/79594/2934/81671/3920/7251/10211/643246/1845/4320/11096/27443/23399/55337/1776/2107/2932/9140/146206/29082/4778/5295/5347/6455/6599/11198/4314/253725/8673/55201/830/3249/2043/27429/832/3684/56893/11337/11345/1803/6597/11344/5…	446
BP	GO:1904951	positive regulation of establishment of protein localization	304/16611	309/18800	1.95048e-11	2.48491e-09	1.65647e-09	3552/340146/54209/1263/55741/640/2822/9585/6714/10134/7226/23086/54471/55294/51128/23607/10575/7447/5880/89781/11235/8111/4826/5106/56947/7251/3783/5590/2621/23379/7424/388581/2645/8398/2932/4641/9747/3689/3208/5295/7042/4825/5580/10972/80184/3717/27429/9662/3684/7984/51100/79778/3059/5007/5481/285966/4946/51614/118424/3458/25874/51366/2181/3123/10399/2696/6717/65018/6659/7855/7097/55696/908/7099…	304
BP	GO:0009314	response to radiation	425/16611	438/18800	2.64659e-11	3.30565e-09	2.20358e-09	3552/3627/7076/10413/1281/57805/1263/1936/54617/1040/11011/57103/842/55693/114769/79073/57817/84152/472/5896/285331/10206/2903/346007/10269/57010/5153/51776/3000/4318/57282/778/23411/79823/5158/8553/7056/23746/358/7287/10636/6648/150678/840/2189/5936/7486/83759/3198/602/143941/51720/22890/6247/5295/5961/10524/2793/4314/5580/1621/5603/23596/361/1233/1535/3735/5481/4852/847/23621/2780/90313/1196/57…	425
BP	GO:0034655	nucleobase-containing compound catabolic process	394/16611	405/18800	3.28563e-11	4.0249e-09	2.68304e-09	3669/4939/1890/60489/221662/9641/23034/56478/23185/57690/472/115572/3184/6556/1806/7538/22794/7432/4848/162989/200316/9567/23098/1775/10949/8570/6039/1774/8241/677/57472/154197/27443/2926/10492/1776/57060/6832/65080/22882/54542/2107/10140/51538/22894/7133/51816/26058/11164/200315/6036/4615/80153/4116/149041/5580/26019/79048/7378/23644/55149/196513/10921/11340/3251/5167/54890/146857/4907/114609/25…	394
BP	GO:0034329	cell junction assembly	408/16611	420/18800	3.45289e-11	4.14998e-09	2.76642e-09	4983/84885/10395/7162/1004/5175/51225/1969/137075/1495/64101/22943/7205/287/6548/6714/6385/2039/421/60/9231/257194/4884/23129/23284/5021/7422/1826/83660/1981/25/5583/23316/81671/27286/79953/1399/10211/1845/87/55209/1003/2185/143098/125111/928/3678/4641/2702/9076/78999/9071/139065/57493/1948/1946/187/4092/143162/2335/389/4593/79778/53942/51599/3655/6281/29984/4131/22871/27067/23136/9948/347902/204…	408
BP	GO:0051656	establishment of organelle localization	393/16611	404/18800	3.62798e-11	4.27967e-09	2.85288e-09	4627/3566/129880/84722/5293/55062/2242/640/6683/5873/79443/6385/84709/472/79816/51128/5871/5730/2268/10253/26258/81565/3993/4935/63971/5880/4744/3162/11235/29109/79083/553115/7251/3916/4542/79648/29058/5590/4033/10096/84376/10252/6850/64005/4641/29082/2623/284021/79998/5347/8673/55201/30817/55773/10972/84062/9368/9146/23299/3598/8013/4645/7534/3965/8301/11314/4926/4131/1176/22871/8379/54908/695/2…	393
BP	GO:0048285	organelle fission	476/16611	493/18800	3.83898e-11	4.44623e-09	2.96391e-09	3552/10040/150280/10919/83987/84722/2069/54617/55810/9985/6683/23023/9585/9820/472/54471/164045/81565/2827/23126/79598/5155/4733/79594/858/11022/56947/5885/10096/11144/10744/51343/84944/29082/8658/56603/79998/5347/79884/221711/400629/10734/11077/2059/4926/160140/8379/54908/4292/51203/245711/1325/126353/11044/3481/23383/49856/55719/10783/225689/10111/23603/9587/65018/1761/8243/8900/3837/26013/5512…	476
BP	GO:0051054	positive regulation of DNA metabolic process	260/16611	263/18800	4.45442e-11	5.0669e-09	3.37765e-09	51111/5570/83666/6778/54799/3178/7490/2069/54617/80314/26122/57103/55693/6714/10933/472/3184/958/60/11177/6188/54537/1545/7454/23126/10575/5155/23411/8741/64210/7486/2185/2139/51720/25792/6944/5514/8658/409/5582/7468/10524/80169/5983/5580/57634/3146/23529/25849/23347/64094/79915/7014/4292/8412/55719/51010/225689/10111/11143/7037/3181/2735/4931/908/196528/7874/54921/5595/2255/306/4609/149840/4204/…	260
BP	GO:0033674	positive regulation of kinase activity	460/16611	476/18800	4.87075e-11	5.44328e-09	3.62855e-09	1116/4057/10040/5154/10451/5899/388121/8826/1857/93/84722/54209/1969/2069/930/805/2013/9607/22943/972/57103/3690/4233/6714/6385/55890/55294/6556/5871/958/2268/54757/6188/10253/8651/376497/904/5155/23411/4919/148932/11235/959/1191/51429/6352/7422/25/11035/3937/2358/8312/5590/2621/2321/2180/7424/2185/6850/353514/284/8322/6091/5618/7042/650/100133941/5580/51422/920/253260/3717/5311/2043/11211/4665/1…	460
BP	GO:0000280	nuclear division	432/16611	446/18800	5.1815e-11	5.61277e-09	3.74154e-09	3552/10040/150280/10919/83987/84722/2069/54617/55810/9985/6683/9585/9820/472/164045/81565/2827/23126/79598/5155/4733/858/11022/5885/10096/11144/10744/51343/84944/29082/8658/56603/79998/5347/79884/221711/400629/10734/11077/2059/4926/8379/54908/4292/51203/245711/1325/126353/11044/3481/23383/49856/55719/10783/225689/10111/9587/1761/8243/8900/3837/26013/55125/26993/150365/152185/122402/7474/3835/5574…	432
BP	GO:0048732	gland development	418/16611	431/18800	5.19864e-11	5.61277e-09	3.74154e-09	23440/3213/5154/5176/4478/4939/7471/5253/445/6778/9113/29842/1051/5727/7490/1969/8835/4781/4233/3488/5308/6714/57817/27122/472/5896/2487/3184/55294/10269/6239/1545/91355/6777/23242/6195/23129/3162/5021/5106/7422/5449/25/6648/11035/9480/1399/2304/5324/220/887/64220/51043/22890/9076/4357/6091/5618/2296/7042/80169/650/6658/2267/3142/26019/3717/3249/5311/9368/823/5087/7048/2627/51599/7128/10371/4192/…	418
BP	GO:0001655	urogenital system development	344/16611	352/18800	5.29692e-11	5.62356e-09	3.74873e-09	5154/5176/10413/7471/255743/445/8826/5175/93/5727/7490/30812/25937/842/6385/3913/268/10269/947/9231/26258/9510/3217/5155/4318/2719/3227/23129/56913/26108/7422/84662/8842/7466/185/1399/5324/3675/5420/57216/10252/163/11174/9788/64220/284/56603/4357/5618/2296/7704/26508/7042/4090/650/100133941/9353/6772/80184/84062/1948/5311/2043/5087/4092/3070/54798/3237/847/2650/182/639/384/2294/84623/90/8516/4643…	344
BP	GO:0043161	proteasome-mediated ubiquitin-dependent protein catabolic process	402/16611	414/18800	6.1997e-11	6.47411e-09	4.31572e-09	115290/57805/3077/1263/23429/25937/55741/162517/127733/11011/57542/6477/3429/10134/10206/55294/23607/406/6613/84417/1454/23411/55527/1191/10956/6048/819/5701/7466/8312/5704/9604/26046/2932/51343/127544/143941/25852/26270/409/9861/7184/10524/5347/6599/9325/92369/64750/10475/10221/8473/79139/4092/493829/4189/56893/7327/11337/7353/26232/55101/6478/5516/10973/5887/1161/26268/4287/91544/54994/126433/4…	402
BP	GO:1903362	regulation of cellular protein catabolic process	255/16611	258/18800	7.88632e-11	8.10256e-09	5.40126e-09	4983/4478/7471/9113/57805/3077/54209/1263/23429/11011/1075/57817/84074/10134/55294/64285/6613/11236/1454/51257/1191/79589/819/149628/160418/5701/8312/27074/2185/5704/9604/8975/2932/51343/127544/143941/5582/5347/6599/10221/2043/8473/4092/57095/56893/11337/11345/7128/5887/80279/4287/84871/26259/5721/6872/10399/20/255488/65018/440730/51035/55743/5720/150684/153769/7874/91445/5706/161582/120892/26263…	255
BP	GO:0048562	embryonic organ morphogenesis	289/16611	294/18800	1.00644e-10	1.01604e-08	6.77304e-09	3213/51384/10413/115908/129880/7471/3214/7703/3215/2535/1969/8323/3199/2202/55584/84678/860/2487/55636/10253/3217/3212/3227/4188/2304/286204/57216/57453/3198/220/64220/5013/8463/3142/348093/55084/29072/80184/3249/5311/9368/187/3203/1954/6935/55081/7048/6262/1856/2294/90/79955/8516/3204/9968/2263/10818/613/64072/7855/51676/4323/2735/1301/497189/9742/2697/7474/121227/27173/3200/668/5950/3211/1482/5…	289
BP	GO:0055074	calcium ion homeostasis	452/16611	468/18800	1.02082e-10	1.01604e-08	6.77304e-09	79054/3627/80045/779/23075/6288/4283/6373/11151/930/55013/29887/10803/56477/805/5910/287/56704/55584/1234/10134/8477/7226/624/2903/958/54757/55636/2357/2827/356/51393/3718/6547/79041/5777/778/10523/7504/9365/6263/5021/1903/729230/6352/6863/80024/25/1043/858/79608/10268/7224/7466/185/3074/5733/6869/2358/1003/55503/8989/5734/489/2185/55283/338557/8398/1604/2906/5023/887/2623/1230/7184/2830/5031/846…	452
BP	GO:0072503	cellular divalent inorganic cation homeostasis	476/16611	494/18800	1.27626e-10	1.25073e-08	8.33753e-09	79054/3627/4499/80045/779/23075/6288/4283/6373/11151/930/55013/10803/56477/805/5910/287/56704/55584/55630/1234/10134/8477/7226/624/2903/6556/958/25800/55636/2357/2827/356/51393/3718/6547/79041/5777/778/10523/7504/6263/5021/1903/6279/4489/729230/6352/6863/80024/25/1043/858/79608/4496/10268/7224/7466/185/3074/5733/6869/2358/1003/55503/8989/5734/489/2185/55283/221074/338557/8398/1604/4493/2906/5023/…	476
BP	GO:0050863	regulation of T cell activation	334/16611	342/18800	1.48498e-10	1.4182e-08	9.45388e-09	259307/3552/84524/3566/10288/3958/8740/27240/916/79679/3956/3077/1051/921/11151/914/923/3127/941/3122/115004/26191/6504/55423/3659/972/8764/3600/2213/246778/6714/6385/64332/861/3118/5896/84695/9231/6188/54900/8651/3718/5777/6777/5074/5880/10875/11221/64926/1960/10326/868/959/729230/6352/3575/1493/25/140885/11035/3133/3485/1845/5590/3119/23308/3115/6932/864/6850/54542/9308/1604/26279/10859/10385/1…	334
BP	GO:0006913	nucleocytoplasmic transport	302/16611	308/18800	1.51393e-10	1.4182e-08	9.45388e-09	54830/84268/23534/3178/10023/56478/3429/10553/55612/868/4600/8106/10636/29969/60468/84271/5784/8312/2621/5936/6850/602/2932/10073/284/5514/5295/6672/5580/26019/29072/3717/3841/6774/54890/3059/9818/1026/6428/3458/51366/5903/4869/8878/10758/9631/57510/3181/3837/7248/26993/9221/6059/55696/84324/23049/51496/55746/6934/84934/8692/137735/161424/811/120892/7919/55421/2810/26263/65110/55374/10762/92335/3…	302
BP	GO:0051169	nuclear transport	302/16611	308/18800	1.51393e-10	1.4182e-08	9.45388e-09	54830/84268/23534/3178/10023/56478/3429/10553/55612/868/4600/8106/10636/29969/60468/84271/5784/8312/2621/5936/6850/602/2932/10073/284/5514/5295/6672/5580/26019/29072/3717/3841/6774/54890/3059/9818/1026/6428/3458/51366/5903/4869/8878/10758/9631/57510/3181/3837/7248/26993/9221/6059/55696/84324/23049/51496/55746/6934/84934/8692/137735/161424/811/120892/7919/55421/2810/26263/65110/55374/10762/92335/3…	302
BP	GO:0007389	pattern specification process	447/16611	463/18800	1.61691e-10	1.49272e-08	9.95062e-09	4223/3213/92749/25790/129880/7471/79728/63950/3214/7703/221833/93/3215/5727/7490/3199/7093/22943/5015/5308/7026/57619/84678/2114/472/389549/718/3170/3217/2719/91355/3212/3227/23242/4188/170825/8553/712/11022/79809/1399/8701/286204/8312/55172/57216/164781/10252/2926/220136/23432/53820/57453/3226/55502/56603/6091/2296/5013/27152/7704/26508/4090/650/64399/4300/8320/5311/5087/187/3684/3203/1954/5090/…	447
BP	GO:0071214	cellular response to abiotic stimulus	316/16611	323/18800	1.8958e-10	1.70088e-08	1.13383e-08	362/7076/10413/9033/8740/841/1277/1936/54617/11011/5971/3659/2822/6548/842/55693/114769/5724/79073/57817/51311/472/624/10269/958/4638/51776/3000/4099/4318/23411/79823/8111/4055/23746/358/54206/150678/677/51284/65267/5734/7486/7132/6494/3208/22890/6247/5295/4615/4314/5580/5603/5311/23596/1535/3645/5481/84329/57646/1026/7100/4776/1643/4869/836/10715/7442/9780/6872/5269/83959/388/838/8091/1965/5429/…	316
BP	GO:0104004	cellular response to environmental stimulus	316/16611	323/18800	1.8958e-10	1.70088e-08	1.13383e-08	362/7076/10413/9033/8740/841/1277/1936/54617/11011/5971/3659/2822/6548/842/55693/114769/5724/79073/57817/51311/472/624/10269/958/4638/51776/3000/4099/4318/23411/79823/8111/4055/23746/358/54206/150678/677/51284/65267/5734/7486/7132/6494/3208/22890/6247/5295/4615/4314/5580/5603/5311/23596/1535/3645/5481/84329/57646/1026/7100/4776/1643/4869/836/10715/7442/9780/6872/5269/83959/388/838/8091/1965/5429/…	316
BP	GO:0022604	regulation of cell morphogenesis	299/16611	305/18800	2.08335e-10	1.84318e-08	1.22869e-08	10630/4478/4627/10395/1857/29882/254065/11151/2242/29780/55843/57381/55785/57619/6714/2039/9820/81848/752/157922/7940/93663/10269/445815/2268/6239/2633/152273/5880/1627/23129/103910/8437/7422/51265/25/79594/23316/23221/3074/1399/7694/2192/55660/2185/22854/4076/6900/3689/8322/3679/57175/23433/253725/6347/91663/3249/2043/9368/832/1946/6857/2335/389/5034/55604/152503/9723/6281/2059/29984/4192/27067/…	299
BP	GO:0015833	peptide transport	246/16611	249/18800	2.19811e-10	1.91808e-08	1.27861e-08	93/3077/9607/972/640/2822/760/51296/7226/55636/406/3170/7447/91355/7432/8111/6279/4826/5106/6352/80024/6865/388581/2645/338557/8398/415116/4825/3717/9368/1946/6564/134/4843/23457/6755/5007/1268/57818/2281/3458/25874/9463/51167/6833/7442/3123/6567/23657/729025/2696/6717/54097/6659/6890/2697/5950/54795/240/2243/5467/3172/6934/5894/51714/6616/57555/23409/6891/90007/2852/9024/286676/4087/7425/26154/1…	246
BP	GO:0001659	temperature homeostasis	177/16611	177/18800	2.73135e-10	2.35118e-08	1.56732e-08	3552/79054/3566/2171/6778/33/93/1051/64641/50486/3600/7226/9658/406/2827/376497/51393/51316/5021/729230/7422/4857/5733/25979/11096/2180/6850/115209/3226/338557/51043/5618/63976/26027/216/1621/8809/3717/6774/8473/134/3397/3060/9536/10912/1268/5746/4923/58488/3910/3662/1734/8878/2308/7442/1376/7852/7090/2697/7099/7840/153/43/23028/4898/7030/1240/154/857/51087/55856/2876/116/55818/7067/5565/2778/395…	177
BP	GO:0006874	cellular calcium ion homeostasis	440/16611	456/18800	3.06793e-10	2.58259e-08	1.72159e-08	79054/3627/80045/779/23075/6288/4283/6373/11151/930/55013/10803/56477/805/5910/287/56704/55584/1234/10134/8477/7226/624/2903/958/55636/2357/2827/356/51393/3718/6547/79041/5777/778/10523/7504/6263/5021/1903/729230/6352/6863/80024/25/1043/858/79608/10268/7224/7466/185/3074/5733/6869/2358/1003/55503/8989/5734/489/2185/55283/338557/8398/1604/2906/5023/887/2623/1230/7184/2830/5031/84636/2785/100133941…	440
BP	GO:0032535	regulation of cellular component size	342/16611	351/18800	3.08127e-10	2.58259e-08	1.72159e-08	10451/4478/51520/23075/9113/29882/11151/6696/10723/7408/23645/54942/7114/2039/93663/83547/81565/7454/4099/8482/51393/822/1627/7504/358/51429/7422/1826/3575/51265/25/2934/7224/3783/84561/65267/54961/2185/2932/6900/146206/55971/9353/4825/5580/253725/9873/91663/253260/830/9368/832/1946/361/57403/1954/79822/51466/2335/11344/1236/6049/9856/55604/3059/9723/8301/10371/6405/2059/9026/4131/343578/79890/99…	342
BP	GO:0007517	muscle organ development	326/16611	334/18800	3.36974e-10	2.7877e-08	1.85831e-08	51111/4223/3627/150921/63950/445/1281/1489/221662/2535/7490/94104/30812/84466/7093/10791/56704/1134/1674/7026/55553/100128927/4638/4205/55636/406/140578/3908/23411/1960/7504/8763/23060/23764/26287/4015/858/245806/1827/5077/10211/59269/2218/55352/163126/64220/56603/2296/3679/26508/53834/7042/650/3142/57493/8320/4092/493829/64208/57190/2275/1106/9328/150572/6262/607/6938/4209/1293/78994/2047/2115/9…	326
BP	GO:0009612	response to mechanical stimulus	200/16611	201/18800	3.77032e-10	3.07909e-08	2.05256e-08	1116/3627/9033/8740/841/1277/5727/8061/3659/6548/55584/6714/51311/958/56729/4099/2354/4055/358/2934/3485/6869/51284/8989/5734/2185/7132/3736/64220/4615/6772/3249/5311/1535/9856/7048/23621/6262/5493/4131/4192/54532/7100/2115/79955/9780/7852/9311/8932/838/5764/4323/1301/497189/4313/7099/9994/5595/5894/3725/3727/7508/51761/23349/4790/7273/83862/58/6513/26090/85358/54407/8915/387/8195/285/1756/50964/…	200
BP	GO:0003018	vascular process in circulatory system	259/16611	263/18800	3.99331e-10	3.20715e-08	2.13793e-08	2171/2730/81031/8714/2643/145741/5910/1889/4846/6714/624/376497/5021/3672/7422/25/6648/185/6869/1003/6865/489/59342/8398/5023/284/1311/2702/5345/2296/9153/9353/482/3274/1621/9368/6541/134/387700/8884/9498/6508/23428/83483/136/388125/6833/6506/84889/9590/3269/6567/9732/20/9475/151/7037/613/3827/5029/10979/4313/6533/3357/152/6528/1131/54795/153/2243/5467/6580/2828/10242/143282/551/6540/5592/2837/65…	259
BP	GO:0051223	regulation of protein transport	476/16611	495/18800	4.02782e-10	3.20715e-08	2.13793e-08	3552/6288/340146/54209/1263/55741/9607/640/2822/10023/9585/6714/3429/2039/10134/7226/23086/54471/55294/91543/51128/23607/406/64285/3170/81565/7447/3993/91355/5880/285381/89781/55612/11235/8111/4826/5106/6352/10956/80024/29969/56947/7251/3783/5784/5590/2621/23379/7424/388581/2645/8398/2932/4641/9747/3689/284/3208/5295/64215/7042/6672/415116/4825/5580/10972/80184/3717/27429/1946/3684/7327/7984/5110…	476
BP	GO:0032386	regulation of intracellular transport	324/16611	332/18800	4.13274e-10	3.25007e-08	2.16654e-08	4478/340146/1263/55741/10023/9585/6714/3429/2039/10134/54471/55294/51128/81565/11236/5880/4744/89781/55612/11235/4600/10956/29969/56947/79809/3916/5784/2621/5936/23379/2932/4641/9747/3689/30846/284/3208/5295/6672/5580/29072/80184/3717/27429/81555/50632/3684/7327/51100/22876/79778/3059/285966/5350/4926/4131/9818/4946/160140/80055/51614/118424/3458/51366/404636/225689/20/65018/9001/7855/26993/9221/…	324
BP	GO:0140694	non-membrane-bounded organelle assembly	368/16611	379/18800	4.21848e-10	3.27704e-08	2.18451e-08	1465/4478/26112/64147/6234/54617/1040/56478/7072/6714/9898/4205/6188/23126/2318/79598/4733/4848/1656/2934/57472/83939/440270/1069/4839/29082/8658/9908/26054/80153/5347/149041/79884/9662/7984/118611/79441/4926/282809/55239/23369/9948/4292/54801/6147/4869/55052/126353/56342/49856/10432/1073/10529/10783/225689/27229/85378/9924/51112/1965/10844/5239/51676/8243/3837/55125/152185/7140/10324/23332/3796/…	368
BP	GO:0019693	ribose phosphate metabolic process	382/16611	394/18800	4.27526e-10	3.28114e-08	2.18724e-08	6999/122970/196883/55711/51268/54898/54209/122622/205/1969/5165/51166/57103/10861/7114/195827/2987/1806/168537/3000/1723/64834/55526/9567/9759/23181/2539/32/2819/136332/387712/79717/80221/2618/27109/2180/2645/2203/26289/11164/26027/10965/84433/23433/4880/5162/641372/5634/51422/5836/134526/7378/6774/8473/3251/31/5167/8801/4907/55312/284486/7167/1807/3458/25874/2181/8382/65018/9061/641371/10380/202…	382
BP	GO:0051604	protein maturation	307/16611	314/18800	4.83629e-10	3.66752e-08	2.44481e-08	5327/4627/841/2152/5727/9508/715/7093/5054/5552/81689/842/114769/1889/6714/861/2903/10269/60560/9391/11236/837/64210/4826/55851/871/51279/2934/840/1362/7466/4285/3240/5328/831/115209/1522/6900/83475/1311/5345/27247/79094/5646/3249/27429/81555/8473/1803/54997/60559/3818/64115/6281/23621/1514/8728/119587/57002/2281/8767/836/60496/80018/9718/147372/10730/6659/8530/4323/2590/2023/1520/51726/51126/224…	307
BP	GO:0016311	dephosphorylation	408/16611	422/18800	4.95002e-10	3.7096e-08	2.47286e-08	10288/10395/79442/255743/3958/23075/8826/162466/54935/26191/5522/23645/805/2822/57103/132160/761/64900/10076/6714/3613/5509/84152/55291/7529/26051/3476/5777/11221/1847/84867/3672/3635/8776/11035/1827/2053/1845/5784/1003/23399/54961/1844/2203/84919/2139/2932/9562/57552/26469/27124/7184/79948/7042/23239/650/5580/28227/3717/150290/11072/134/8073/22876/221294/4907/5209/11314/55313/5533/476/5516/51251…	408
BP	GO:0070661	leukocyte proliferation	322/16611	330/18800	5.06695e-10	3.74928e-08	2.49931e-08	259307/3552/10451/4478/10288/3958/8740/684/916/79679/1051/11151/54209/923/930/941/26191/6504/3659/972/640/8764/3600/2213/246778/6385/202309/472/4332/7940/196/6556/958/9231/6188/22806/3718/128506/5777/6777/5074/5880/64926/868/959/3635/729230/1191/6352/3575/1493/25/11035/3133/3485/4064/6869/23308/3115/23495/6850/54542/1604/26279/10859/10385/10457/7133/51043/84433/4615/100133941/149041/5580/970/3717…	322
BP	GO:0098742	cell-cell adhesion via plasma-membrane adhesion molecules	274/16611	279/18800	5.12067e-10	3.74928e-08	2.49931e-08	3683/214/1829/1004/5175/923/137075/64101/56114/421/4099/23284/8763/7216/10205/1826/286204/1003/1951/3383/137970/22854/53827/57453/6900/3678/3689/284021/9076/6091/78999/682/53834/9071/7042/650/91663/1946/3684/22859/54798/7048/133418/5680/56105/22871/347902/5802/84623/90/56126/24146/56138/56971/56127/64072/6403/65217/5819/54538/56100/26167/23654/1008/27328/56106/84962/56109/634/29930/56133/56129/93…	274
BP	GO:1903131	mononuclear cell differentiation	418/16611	433/18800	6.79974e-10	4.92208e-08	3.28112e-08	259307/3552/84524/4627/3566/7471/10288/6778/916/3956/1051/5293/5450/54209/914/2242/930/941/3122/26191/10803/6504/925/5971/3659/972/640/974/3600/2213/114836/246778/64332/861/3696/55365/860/3702/472/5896/7226/84695/91543/915/5153/55636/22806/10320/6482/8651/3718/5777/6777/3140/10875/11221/1960/8111/4055/9759/959/917/3635/729230/23598/10538/7422/3575/1493/25/116071/11035/677/6688/5590/2621/5734/3714…	418
BP	GO:0010975	regulation of neuron projection development	416/16611	431/18800	8.16533e-10	5.84417e-08	3.89579e-08	5176/29882/51225/6696/2242/22943/81618/9820/7101/257194/81565/4099/8482/140578/51393/57498/23242/1627/23129/1400/4919/7504/114788/23098/7422/1826/51265/25/23316/124925/7224/7533/80258/1399/3675/129807/2185/221074/11178/22854/4076/2932/6900/83999/2896/6091/27124/51199/9353/482/54664/85442/84062/1948/2043/1946/1954/10716/2335/11344/6049/22876/3397/9856/6324/9723/3655/10371/6383/6405/1268/6280/4131/…	416
BP	GO:0060284	regulation of cell development	480/16611	500/18800	8.57532e-10	6.06942e-08	4.04595e-08	23440/4057/3213/3552/5176/10413/5624/63950/29882/6696/54209/30812/1495/2039/9820/81848/2487/55294/7101/389549/55636/406/6239/81565/2633/4099/8482/140578/51393/11221/1627/23129/1903/170825/8111/8553/7422/1826/10636/51265/25/5583/23316/7224/7533/1399/5324/1003/2192/64581/7424/84376/7132/4076/443/2932/55502/10859/7133/2896/6091/26508/51199/650/9353/4880/4825/56833/91663/10221/2043/1946/23529/4092/19…	480
BP	GO:0043254	regulation of protein-containing complex assembly	388/16611	401/18800	8.98747e-10	6.29123e-08	4.19381e-08	4478/115362/3958/5899/9113/84722/11151/64147/54209/7408/2242/23521/9641/22943/54942/4233/6714/7114/2039/472/8631/157922/93663/51128/56937/6188/822/1627/4733/55612/637/1191/51429/7422/1981/25/2934/1003/5590/54961/5734/23379/64581/2185/143098/221074/6850/2932/146206/3054/27124/26054/51199/79998/4615/55971/9353/10142/4314/5580/253725/9873/91663/253260/830/3146/832/7453/50632/79822/51466/7984/11344/5…	388
BP	GO:0022409	positive regulation of cell-cell adhesion	285/16611	291/18800	9.16598e-10	6.34645e-08	4.23062e-08	259307/3552/10630/3566/10288/8740/916/5329/22915/79679/3956/921/11151/923/84466/3127/941/3122/26191/6504/55423/972/8764/3600/5724/84034/10076/6714/64332/861/2039/3118/5896/8631/6188/3170/8651/3718/5777/6777/11221/64926/1960/10326/959/729230/6352/3575/140885/3133/3485/10211/5590/3119/23308/5420/3115/864/6850/9308/1604/10859/9435/3689/10385/51043/22890/201627/5345/7704/84433/100133941/3108/3142/920…	285
BP	GO:0050890	cognition	299/16611	306/18800	1.10617e-09	7.51587e-08	5.01016e-08	5176/10919/10288/7162/1051/54209/8061/3122/123803/22943/84152/5896/2903/5153/55636/26258/6547/7432/5021/10636/25/23316/1827/8701/55209/3675/6869/5590/6865/55450/1137/56924/3198/8398/6900/3678/64220/143941/5582/84061/1621/55084/84062/9993/55695/134/10716/4593/8301/152789/8484/1268/4192/4923/23237/627/4776/100528062/836/7143/6833/8516/5575/3269/139411/23657/8326/5764/7248/497189/57468/567/7097/2594…	299
BP	GO:0009259	ribonucleotide metabolic process	372/16611	384/18800	1.10909e-09	7.51587e-08	5.01016e-08	6999/122970/196883/55711/51268/54898/54209/122622/205/1969/5165/51166/57103/10861/7114/195827/2987/1806/168537/3000/1723/64834/55526/9567/9759/23181/32/2819/136332/387712/79717/80221/2618/27109/2180/2645/2203/26289/26027/10965/84433/23433/4880/5162/641372/5634/51422/134526/7378/6774/8473/3251/31/5167/8801/4907/55312/284486/7167/1807/3458/25874/2181/8382/65018/9061/641371/10380/2023/1836/23205/549…	372
BP	GO:0050878	regulation of body fluid levels	370/16611	382/18800	1.34068e-09	8.92634e-08	5.9504e-08	362/5154/5327/10630/1465/10451/4627/4939/5624/5265/1281/5359/710/2152/6288/308/5329/22915/1192/170692/8323/8835/5054/2013/640/3690/4233/5873/84034/4846/6714/2039/5321/2191/958/60/947/26258/3170/7454/5155/5777/6777/83706/7432/10627/89781/7450/64834/5021/4302/7056/959/358/57834/646960/7422/7466/3783/3315/6869/966/2621/2192/5328/3043/6850/928/5023/2623/4778/51043/1311/2702/9076/56603/5345/5618/5580/…	370
BP	GO:0045732	positive regulation of protein catabolic process	230/16611	233/18800	1.34526e-09	8.92634e-08	5.9504e-08	4478/54209/1263/2822/29763/1075/57817/10134/140458/55294/83547/6613/2719/11236/1454/7432/868/51257/1191/51429/79589/149628/160418/5701/85407/8312/2185/5704/9604/8975/2932/51343/127544/7133/5347/64750/10221/4092/11337/152503/7128/4946/4287/10533/84871/3458/26259/2308/140462/6872/10399/20/255488/440730/725/7474/55743/153769/91445/5706/27352/1027/4898/120892/4905/26263/7805/91304/7430/1050/9870/857/…	230
BP	GO:0010506	regulation of autophagy	327/16611	336/18800	1.37861e-09	9.05336e-08	6.03507e-08	10346/10919/5899/11067/54209/1263/55062/26191/57535/11011/57103/4233/79443/472/10206/55294/10269/10325/26086/8131/11180/23411/1411/3162/80317/6048/1981/25/85363/6737/3315/11040/58476/27074/11178/117854/84219/8975/2932/387104/9140/29082/10524/5768/3587/529/10475/823/27429/9100/6774/3146/56893/51100/666/60592/5987/80772/27/10533/9830/3458/8767/220441/836/2308/10715/84148/8992/225689/65018/533/7416/…	327
BP	GO:0042886	amide transport	281/16611	287/18800	1.39594e-09	9.07359e-08	6.04856e-08	93/3077/9607/972/640/2822/760/366/51296/7226/55636/406/3170/376497/7447/91355/7432/4547/8111/6279/4826/5106/6352/80024/154664/6865/388581/2645/338557/8398/415116/4825/3717/9368/1946/6564/134/4843/23457/6755/8884/5007/1268/57818/80772/2281/3458/25874/9463/51167/6833/7442/3123/6567/23657/729025/2696/6717/20/54097/6659/6890/2352/2697/5950/54795/240/2243/5467/3172/6934/5894/51714/6616/89872/6563/5755…	281
BP	GO:0051098	regulation of binding	355/16611	366/18800	1.48122e-09	9.53067e-08	6.35325e-08	115908/83666/5899/5329/3077/84525/64641/3005/805/7262/22943/640/4233/55693/114769/6714/7114/55294/10269/60/26086/5155/4318/1454/285381/23129/1400/6612/3162/8904/4188/868/9759/4015/1981/25/149628/6737/10211/3001/25979/489/8487/117854/1522/602/2932/7023/143941/2623/55323/58499/284/8658/409/55906/2296/6672/650/5347/5580/171392/84062/4043/3717/2043/3146/79139/79822/3397/7009/6281/57326/5516/9026/5350…	355
BP	GO:0046883	regulation of hormone secretion	228/16611	231/18800	1.6854e-09	1.0736e-07	7.15673e-08	3077/6696/9607/640/2822/7226/56729/55636/406/3170/7447/91355/8111/4826/5106/6352/80024/185/6869/6865/388581/2645/338557/8398/2661/415116/4825/8673/3717/1946/134/4843/6755/5007/1268/57818/2281/3458/25874/9463/6833/3123/2696/6717/6659/2697/3624/668/5950/54795/240/2243/5467/3172/6934/4986/51714/6616/57555/23409/90007/2852/9024/286676/26154/4089/2550/9066/2850/114897/5978/7200/6664/91608/51768/65985/…	228
BP	GO:0006163	purine nucleotide metabolic process	381/16611	394/18800	1.72889e-09	1.0904e-07	7.26873e-08	6999/122970/196883/55711/51268/54898/54209/122622/205/1969/5165/51166/57103/10861/4846/7114/195827/2987/168537/3000/64834/55526/9567/9759/23181/32/2819/136332/387712/79717/80221/2618/27109/2180/2645/2203/26289/3208/26027/10965/84433/23433/2766/4880/5162/641372/5634/51422/134526/6774/8473/3251/31/5167/8801/4843/4907/284486/7167/136/3458/25874/2181/8382/65018/9061/641371/10380/2023/1836/144811/2320…	381
BP	GO:0043087	regulation of GTPase activity	353/16611	364/18800	1.79466e-09	1.12078e-07	7.47125e-08	5924/10451/51520/8826/1857/9411/1969/55843/5910/64411/4233/55785/8477/29/141/958/26086/10253/81565/23216/152273/64926/23526/23129/9628/868/51429/6352/128272/8437/10636/858/1399/55531/2185/10252/2932/6494/132864/409/6004/25780/201176/5999/27237/6347/6846/253260/2043/11211/1946/9882/221002/7984/1236/8301/3655/6281/57326/55803/6364/1856/2041/2042/150696/23102/55619/8412/3987/6792/6001/9649/10399/236…	353
BP	GO:0009913	epidermal cell differentiation	227/16611	230/18800	1.88631e-09	1.16658e-07	7.77656e-08	3552/51384/10413/9113/6424/6431/5727/1969/2069/5308/23086/7538/1775/23764/54206/5583/677/7251/1475/3714/55283/2125/9119/25932/56603/2296/27152/9368/23596/135228/2627/182/374454/5493/4926/3848/79955/836/3204/81858/7421/3887/9475/2355/613/64072/427/25818/2735/3850/7474/340654/3889/4831/1041/645104/3066/2810/3888/3892/7401/8394/6699/5604/3664/11005/643418/54845/26154/9314/247/6820/8202/337968/5453/4…	227
BP	GO:0032943	mononuclear cell proliferation	293/16611	300/18800	2.05055e-09	1.25596e-07	8.3724e-08	259307/3552/10451/4478/10288/3958/8740/916/79679/1051/11151/923/930/941/26191/6504/3659/972/640/8764/3600/2213/246778/6385/202309/472/4332/7940/196/6556/958/9231/6188/22806/3718/5777/6777/5074/5880/64926/868/959/3635/729230/6352/3575/1493/25/11035/3133/3485/4064/6869/23308/3115/23495/6850/54542/1604/26279/10859/10385/10457/7133/51043/84433/4615/100133941/149041/5580/970/3717/3146/23529/3070/3251/…	293
BP	GO:0051091	positive regulation of DNA-binding transcription factor activity	260/16611	265/18800	2.30542e-09	1.3966e-07	9.30989e-08	4057/10346/7471/2535/8061/9641/5687/114769/8986/268/10206/958/6188/4919/6279/9759/959/1191/7422/11035/5583/815/121268/85363/6737/10211/5590/64581/57121/3656/117854/8322/55906/338699/84433/4615/650/4825/8809/10475/3717/7546/6774/8737/7984/6597/3059/114609/6929/3965/847/64784/114548/6280/4923/1856/5987/283629/695/219790/9830/8767/4869/2319/6872/65018/7037/7185/7474/51360/7097/7099/2033/306/137735/2…	260
BP	GO:0021537	telencephalon development	243/16611	247/18800	2.32401e-09	1.3966e-07	9.30989e-08	63950/1281/4781/84678/56949/7101/389549/55636/26258/81565/8482/5021/170825/2523/358/1943/1399/79648/2618/170302/2932/6900/3736/220/6091/26468/51199/63827/650/9353/482/8320/10579/3361/79048/55695/3251/10716/3912/4852/10371/4192/25911/84623/836/7143/6506/23224/23657/89839/7852/79969/7248/7474/4967/3624/429/388677/585/1436/306/93986/4747/23028/653464/120892/66000/2648/1459/2016/167153/114327/57142/1…	243
BP	GO:0044282	small molecule catabolic process	364/16611	376/18800	2.3631e-09	1.40682e-07	9.37801e-08	6999/259307/122970/55268/60489/33/51268/10449/3081/2184/51302/51166/2528/57103/64900/80896/4846/3613/2806/1806/127/64080/200316/5106/2523/57834/84129/32/8564/89874/4835/2744/2645/8659/443/27349/2530/51816/56603/4357/27124/11164/200315/8630/130589/123688/2527/7378/4843/340665/3030/66002/56898/7167/1268/4143/4923/384/4245/217/594/27350/60496/11112/1376/8309/1962/5860/51380/89839/51540/1610/10380/36…	364
BP	GO:0006066	alcohol metabolic process	350/16611	361/18800	2.39188e-09	1.41076e-07	9.40432e-08	8228/26002/23461/151056/33/10449/8542/51302/2643/54884/5724/7276/3613/27122/5321/27163/1545/127/80168/80271/2539/5106/1066/2819/2053/3990/10577/9249/2185/339761/4779/9562/220/8720/27124/5031/2224/23780/216/650/57540/284161/23541/1621/114876/64137/1583/847/3291/7167/8612/8611/4923/3707/338/51744/336/217/195814/120227/3269/2230/5860/20/56624/79153/10380/427/3612/3931/130367/5092/8574/8821/51360/514…	350
BP	GO:0048545	response to steroid hormone	321/16611	330/18800	2.49726e-09	1.45941e-07	9.72859e-08	5176/5327/10413/445/9113/1277/6696/8061/5931/842/5724/10076/6714/84709/7101/56937/7538/6586/406/1545/2354/23411/1977/4848/5021/5106/358/54206/4015/3485/677/7533/6869/55885/9604/7023/9076/26508/7042/9353/9325/3717/361/6294/57658/6597/6049/8013/1535/6755/3490/7048/3291/476/2103/5732/8611/4192/336/594/1261/90/51366/836/374/149563/20/9063/3931/10013/23205/7097/25959/6754/81285/4306/5467/5122/2033/306…	321
BP	GO:0010876	lipid localization	429/16611	446/18800	2.64683e-09	1.53276e-07	1.02175e-07	3552/5104/5322/2171/23461/5359/5320/388121/8542/8714/6696/54209/55113/1040/9641/5947/26020/4481/3690/140606/366/2806/5321/624/55294/51128/285973/56729/718/376497/356/10350/6777/338440/23411/4547/1191/32/1066/154664/153768/114884/81671/7224/185/3783/3074/391013/3990/10577/5306/2180/114880/6850/8398/26279/788/64220/10351/50636/8322/8273/2661/738/23780/57540/5580/114876/54762/5167/343702/4843/9399/8…	429
BP	GO:0006644	phospholipid metabolic process	375/16611	388/18800	3.01861e-09	1.7323e-07	1.15477e-07	5154/5322/2171/5359/5320/388121/151056/5293/56994/8835/1040/2822/55650/196463/23167/8395/10908/51604/3613/472/5321/27163/10026/80157/79887/26258/8651/376497/145447/84803/54979/5155/80271/55326/150763/3635/54675/8776/114884/1154/3074/25979/391013/3990/126969/133121/8398/26279/10351/9021/27124/2224/5295/79948/284161/5580/55300/55224/8525/22876/142891/2627/5007/3030/284486/8612/8611/80055/3707/336/7…	375
BP	GO:0046651	lymphocyte proliferation	289/16611	296/18800	3.08934e-09	1.75706e-07	1.17128e-07	259307/3552/10451/4478/10288/3958/8740/916/79679/1051/11151/923/930/941/26191/6504/3659/972/640/8764/3600/2213/246778/6385/202309/472/4332/7940/196/6556/958/9231/6188/22806/3718/5777/6777/5074/5880/64926/868/959/3635/729230/6352/3575/1493/25/11035/3133/3485/4064/6869/23308/3115/23495/6850/54542/1604/26279/10859/10385/10457/7133/51043/84433/4615/100133941/149041/5580/970/3717/3146/23529/3070/3251/…	289
BP	GO:0072001	renal system development	304/16611	312/18800	3.12643e-09	1.76242e-07	1.17485e-07	5154/5176/10413/7471/255743/445/8826/5175/93/5727/7490/30812/25937/842/6385/3913/10269/947/9231/26258/9510/3217/5155/4318/2719/3227/23129/56913/26108/7422/84662/8842/7466/185/3675/5420/57216/10252/163/11174/9788/64220/284/56603/4357/2296/7704/26508/7042/4090/650/100133941/9353/6772/80184/84062/1948/5311/2043/5087/4092/3070/54798/3237/847/2650/182/639/384/2294/84623/8516/4643/26146/51668/8549/1075…	304
BP	GO:0072521	purine-containing compound metabolic process	401/16611	416/18800	3.18586e-09	1.78017e-07	1.18668e-07	6999/122970/196883/55711/51268/54898/54209/122622/205/23463/1969/5165/51166/57103/10861/7276/4846/7114/195827/2987/1806/168537/26258/3000/64834/55526/9567/9759/23181/32/2819/136332/387712/79717/80221/2618/27109/2180/2645/2203/51816/26289/3208/26027/10965/84433/23433/2766/4880/5162/641372/5634/51422/134526/6774/8473/3251/31/5167/8801/4843/4907/284486/7167/136/3458/25874/2181/8382/65018/9061/641371…	401
BP	GO:0070085	glycosylation	240/16611	244/18800	3.22722e-09	1.7876e-07	1.19163e-07	11227/29906/84342/2528/2591/55650/3600/93010/8693/6482/114805/23333/57134/56913/144245/2523/55757/160418/54790/51172/6184/2218/11320/79796/11226/283464/2530/83857/160335/10678/84061/55858/2527/374907/8473/200424/2917/29071/2650/256435/440138/80312/56052/4245/22906/4121/80235/283417/20/64116/2134/2673/51301/84752/79695/2590/9761/6487/79070/145173/84620/10690/140687/170384/256281/91319/727936/84197…	240
BP	GO:0002790	peptide secretion	222/16611	225/18800	3.30951e-09	1.81738e-07	1.21149e-07	93/3077/9607/972/640/2822/7226/55636/406/3170/7447/91355/7432/8111/6279/4826/5106/6352/80024/6865/388581/2645/338557/8398/415116/4825/3717/1946/134/4843/6755/5007/1268/57818/2281/3458/25874/9463/51167/6833/7442/3123/6567/2696/6717/54097/6659/5950/54795/240/2243/5467/3172/6934/5894/51714/6616/57555/23409/90007/2852/9024/286676/4087/7425/26154/2550/9066/2850/55088/11315/5978/7200/91608/51768/55512/…	222
BP	GO:0016042	lipid catabolic process	318/16611	327/18800	3.35714e-09	1.82778e-07	1.21842e-07	8228/5919/5322/55268/5320/151056/33/10449/51302/6696/2822/196463/64900/10908/4258/5321/27163/79887/1545/145447/54979/5106/57834/84129/32/1066/4758/11343/7533/3074/391013/129807/3990/133121/150379/8398/26279/27349/57552/56603/284161/5580/8630/11313/134/22876/340665/3030/2517/66002/64784/56898/1268/338/336/11145/2581/257068/1376/8309/1962/56624/79153/427/160428/285148/340654/5346/5467/219970/23659/…	318
BP	GO:0046777	protein autophosphorylation	221/16611	224/18800	3.70266e-09	1.99881e-07	1.33243e-07	10040/5154/2242/805/22848/6714/3702/472/2268/4117/10553/9961/5155/54206/7422/25/11035/815/11040/65267/2321/7424/2185/50488/6850/2932/10457/5582/415116/3717/2043/8737/5167/4593/3645/817/11184/2872/1196/7535/2261/283629/695/2041/2047/4067/6792/6872/10783/225689/10111/2263/5911/65018/1965/7294/3791/5753/23049/79834/5595/790/1859/1436/5292/7272/150094/120892/9344/3725/9261/2064/85456/51701/9943/857/5…	221
BP	GO:0034504	protein localization to nucleus	287/16611	294/18800	3.79006e-09	2.01136e-07	1.34079e-07	10413/83666/54830/9113/84268/23534/83593/1277/1495/25937/56478/6714/26524/23607/10575/55612/6612/868/26108/84662/149628/29969/23399/7486/6850/602/2932/10073/25792/284/5514/7704/5295/6672/23515/5347/5580/3717/3841/6774/3059/80279/9818/1026/3458/51366/5903/8878/2634/10758/54971/9631/11143/7037/3837/10979/9221/4931/55696/908/9913/56257/55746/402/585/8692/137735/10542/811/120892/255919/151636/55374/1…	287
BP	GO:1903311	regulation of mRNA metabolic process	287/16611	294/18800	3.79006e-09	2.01136e-07	1.34079e-07	27316/11051/3178/221662/6431/9641/23034/56478/7072/23185/57690/115572/3184/6556/7538/22794/904/10150/7432/4848/9567/55796/25962/10949/8570/8241/677/57472/154197/4857/5936/10492/57060/54542/10140/22894/26058/23144/4615/4116/149041/5580/79048/196513/10921/11340/6294/54890/114609/10262/27161/10181/146713/23369/6428/4292/28960/4869/58517/11044/6651/10758/27327/51010/79869/123169/9475/9924/3181/3191/2…	287
BP	GO:0045229	external encapsulating structure organization	302/16611	310/18800	3.82063e-09	2.01136e-07	1.34079e-07	10631/165/1295/10630/2331/4016/255743/1306/1281/84171/81031/1277/170692/64147/9508/7490/256764/7093/255631/3913/861/2191/84695/7101/1545/256076/9510/29113/1290/4318/55612/10516/1305/1284/4015/25/871/858/1289/4060/64856/50509/1296/10211/4320/64093/11096/2621/2192/140766/169611/1303/22854/7132/602/1842/11174/146206/7133/105378220/81794/1311/5345/2296/7042/650/5806/4314/5768/56999/4982/10218/3249/12…	302
BP	GO:1903050	regulation of proteolysis involved in cellular protein catabolic process	220/16611	223/18800	4.14224e-09	2.16279e-07	1.44174e-07	4983/7471/9113/57805/3077/54209/1263/23429/11011/1075/84074/10134/55294/64285/6613/11236/1454/1191/819/149628/160418/5701/8312/27074/2185/5704/9604/8975/2932/51343/127544/143941/5582/5347/6599/10221/2043/8473/4092/57095/56893/11337/11345/5887/4287/84871/26259/5721/6872/10399/255488/65018/440730/51035/55743/5720/150684/153769/7874/91445/5706/161582/120892/26263/7805/91304/1459/6201/10869/1050/857/…	220
BP	GO:0043062	extracellular structure organization	300/16611	308/18800	4.66735e-09	2.41716e-07	1.6113e-07	10631/165/1295/10630/2331/4016/255743/1306/1281/84171/81031/1277/170692/64147/9508/7490/256764/7093/255631/3913/861/2191/84695/7101/1545/256076/9510/29113/1290/4318/55612/10516/1305/1284/4015/25/871/858/1289/4060/64856/50509/1296/10211/4320/64093/11096/2621/2192/140766/169611/1303/22854/7132/602/1842/11174/146206/7133/105378220/81794/1311/5345/2296/7042/650/5806/4314/5768/56999/4982/10218/3249/12…	300
BP	GO:0002697	regulation of immune effector process	342/16611	353/18800	5.12522e-09	2.62851e-07	1.7522e-07	51111/259307/5322/3566/6778/3958/10225/710/684/8302/3077/10584/54209/10417/2242/941/3122/115004/26191/6504/972/640/8764/2213/1653/114836/5724/100507436/246778/64332/196/84695/91543/958/718/2268/54537/7454/3823/8482/3718/8547/5777/6777/3140/5880/10875/11221/23411/3162/2220/8741/959/729230/3575/11035/3133/6688/3916/5590/966/3383/5272/64581/1776/6850/117854/54542/1604/3075/10859/3689/2623/7133/51043…	342
BP	GO:0030198	extracellular matrix organization	299/16611	307/18800	5.15799e-09	2.62851e-07	1.7522e-07	10631/165/1295/10630/2331/4016/255743/1306/1281/84171/81031/1277/170692/64147/9508/7490/256764/7093/255631/3913/861/2191/84695/7101/1545/256076/9510/29113/1290/4318/55612/10516/1305/1284/4015/25/871/858/1289/4060/64856/50509/1296/10211/4320/64093/11096/2621/2192/140766/169611/1303/22854/7132/602/1842/11174/146206/7133/105378220/81794/1311/5345/2296/7042/650/5806/4314/5768/56999/4982/10218/3249/12…	299
BP	GO:0030098	lymphocyte differentiation	369/16611	382/18800	5.25319e-09	2.65578e-07	1.77037e-07	259307/3552/84524/3566/7471/10288/6778/916/3956/5293/5450/914/930/941/3122/26191/10803/6504/925/5971/3659/972/974/3600/2213/114836/246778/64332/861/860/3702/472/5896/84695/91543/915/55636/22806/10320/6482/8651/3718/5777/6777/3140/10875/11221/1960/9759/959/917/3635/729230/23598/10538/3575/1493/25/11035/677/6688/5590/2621/5734/3714/2185/6932/1316/864/6850/29760/54542/602/9308/26279/10385/51043/1094…	369
BP	GO:0030072	peptide hormone secretion	217/16611	220/18800	5.79742e-09	2.90784e-07	1.9384e-07	93/3077/9607/640/2822/7226/55636/406/3170/7447/91355/7432/8111/4826/5106/6352/80024/6865/388581/2645/338557/8398/415116/4825/3717/1946/4843/6755/5007/1268/57818/2281/3458/25874/9463/51167/6833/3123/6567/2696/6717/54097/6659/5950/54795/240/2243/5467/3172/6934/5894/51714/6616/57555/23409/90007/2852/9024/286676/4087/7425/26154/2550/9066/2850/55088/11315/5978/7200/91608/51768/55512/65985/11069/5071/1…	217
BP	GO:0009150	purine ribonucleotide metabolic process	354/16611	366/18800	6.03411e-09	3.00291e-07	2.00178e-07	6999/122970/196883/55711/51268/54898/54209/122622/205/1969/5165/51166/57103/10861/7114/195827/2987/168537/3000/64834/55526/9567/9759/23181/32/2819/136332/387712/79717/80221/2618/27109/2180/2645/2203/26289/26027/10965/84433/23433/4880/5162/641372/5634/51422/134526/6774/8473/3251/31/5167/8801/4907/284486/7167/3458/25874/2181/8382/65018/9061/641371/10380/2023/1836/23205/54995/53632/4967/23597/55022/…	354
BP	GO:0001819	positive regulation of cytokine production	455/16611	475/18800	7.20943e-09	3.56001e-07	2.37314e-07	1116/3552/4938/23601/3566/4939/115362/10288/841/79792/2152/6288/916/79679/1051/5293/5450/54209/10417/914/923/2069/941/115004/26191/6504/5054/3659/972/8764/3600/1653/114836/5724/3595/246778/6714/861/51311/4940/3702/4332/6556/91543/958/947/718/2268/6188/1545/8482/84282/6777/23765/23411/55612/3162/959/729230/1191/10538/25/149628/3133/4060/3315/10211/51284/5590/5734/727/3115/64581/64135/5004/6850/117…	455
BP	GO:0032388	positive regulation of intracellular transport	196/16611	198/18800	7.38367e-09	3.618e-07	2.4118e-07	4478/340146/1263/55741/9585/10134/54471/55294/51128/5880/89781/11235/56947/2621/23379/2932/4641/9747/3689/30846/3208/5295/5580/80184/3717/27429/50632/3684/51100/79778/3059/285966/4926/4946/80055/51614/118424/3458/51366/65018/7855/26119/55696/51496/6934/8692/23557/2810/2064/1459/7430/89866/26154/4133/9520/55781/128637/3265/2040/27113/51201/5071/161291/7323/10178/208/118426/57506/11261/10055/23011/…	196
BP	GO:0001822	kidney development	295/16611	303/18800	7.68663e-09	3.7377e-07	2.49159e-07	5154/5176/10413/7471/255743/445/8826/5175/93/5727/7490/30812/25937/842/6385/3913/10269/947/9231/26258/9510/3217/5155/4318/2719/3227/23129/56913/26108/7422/84662/8842/7466/185/3675/5420/57216/10252/163/11174/9788/64220/284/56603/4357/2296/7704/26508/7042/4090/650/100133941/9353/6772/80184/84062/1948/5311/2043/5087/4092/3070/54798/3237/847/2650/182/639/384/84623/8516/4643/26146/51668/10758/11020/51…	295
BP	GO:0018205	peptidyl-lysine modification	378/16611	392/18800	7.76146e-09	3.73881e-07	2.49233e-07	51111/57337/4837/10919/4016/7703/84171/54799/57325/80314/26122/284058/55693/8986/6877/10933/84695/10269/60/27097/6613/23411/84289/6612/55167/79823/4302/4826/9759/5351/23181/54904/7994/4015/23551/79594/51200/54790/55904/6688/55209/7469/54554/9862/64135/8520/23067/56970/3054/83475/6944/63976/26054/7468/10524/4300/29072/26038/57634/8473/23774/10865/200424/10847/5352/150572/9767/57326/5926/79091/5987…	378
BP	GO:0022412	cellular process involved in reproduction in multicellular organism	391/16611	406/18800	7.80631e-09	3.73881e-07	2.49233e-07	54970/5104/10919/7130/7490/8061/2069/55810/9985/6714/472/268/56729/6586/84229/83853/402381/63951/26108/11022/3074/143689/2189/116369/2185/9425/11144/928/286464/84944/89765/8322/409/56603/2296/2661/7704/4090/5347/9353/4880/5806/146849/9576/26038/344018/400629/57095/152015/9519/317719/11077/9403/84223/4192/639/79582/283629/25981/4292/255101/90/245711/9463/9148/84071/8549/283417/6691/79989/8382/8149…	391
BP	GO:0006869	lipid transport	377/16611	391/18800	8.49513e-09	4.03836e-07	2.69202e-07	3552/5104/5322/2171/23461/5359/5320/388121/8542/8714/6696/55113/5947/26020/4481/3690/140606/366/2806/5321/624/51128/285973/56729/376497/356/10350/338440/4547/1191/1066/154664/153768/114884/81671/7224/185/3783/391013/3990/10577/5306/2180/114880/6850/8398/26279/788/64220/10351/50636/8322/8273/2661/738/23780/57540/5580/114876/54762/343702/4843/9399/80833/5007/222642/22925/9536/5948/4923/338/80772/80…	377
BP	GO:0006520	cellular amino acid metabolic process	278/16611	285/18800	9.46924e-09	4.46808e-07	2.97847e-07	6999/259307/51520/445/2730/51268/3081/586/2184/23463/51166/435/4846/2806/1806/5184/26258/8564/89874/2744/79814/2618/2687/8659/443/143941/10056/22929/5831/4357/216/9056/123688/7453/1800/1733/4843/5352/3735/5832/85300/4143/384/594/100287520/29920/60496/11112/6567/23657/5860/51380/89839/51540/1610/64116/2673/5092/4507/8942/3242/55699/2937/790/3172/4522/58478/833/159/131669/4204/23409/25973/549/440/4…	278
BP	GO:0006402	mRNA catabolic process	229/16611	233/18800	1.06968e-08	5.0102e-07	3.33986e-07	221662/9641/23034/56478/23185/57690/472/115572/3184/6556/7538/22794/7432/4848/9567/10949/8570/8241/677/57472/154197/10492/57060/6832/22882/54542/2107/10140/22894/26058/4615/80153/4116/149041/5580/26019/79048/23644/55149/196513/10921/11340/54890/114609/27161/23369/4292/28960/4869/11044/3646/10758/27327/51010/9475/9924/2668/9513/23049/192669/166863/85441/79675/65110/9261/6499/167153/27044/53918/255…	229
BP	GO:0051056	regulation of small GTPase mediated signal transduction	291/16611	299/18800	1.14383e-08	5.3184e-07	3.54531e-07	5924/10451/4983/10395/1281/23075/9411/27128/55843/4233/57480/6714/81848/8477/29/93663/23092/55200/23607/9265/23550/10253/152273/84986/64926/23526/9901/128272/8437/25/10211/3675/84952/2203/10252/6494/6091/57449/84636/7042/201176/9353/57569/57493/57221/10161/397/401387/8473/221002/79822/7984/11337/27334/22898/5516/2059/29984/343578/117178/3707/25894/27/3685/8878/9649/89839/64283/8997/440730/613/253…	291
BP	GO:0022407	regulation of cell-cell adhesion	437/16611	456/18800	1.16264e-08	5.36669e-07	3.5775e-07	259307/3552/10630/84524/3566/7471/10288/445/3958/8740/23075/916/5329/22915/79679/3956/3077/1051/921/11151/170692/923/84466/3127/941/3122/26191/56477/6504/55423/3659/972/640/8764/3600/2213/5724/84034/10076/6714/6385/64332/861/2039/3118/5896/8631/84695/9231/6188/54900/3170/8651/3718/5777/6777/5074/10875/11221/83706/64926/1960/10326/868/959/729230/6352/7422/3575/1493/25/140885/3133/3485/6688/10211/1…	437
BP	GO:0090596	sensory organ morphogenesis	260/16611	266/18800	1.24427e-08	5.70218e-07	3.80114e-07	362/51384/1295/115908/7471/2535/1969/30812/8323/3199/2202/348980/55584/5308/84678/2487/57010/55636/10253/356/1290/7287/7422/1826/8842/1289/1296/286204/6096/3198/22882/220/64220/56603/6247/5013/27152/55084/80184/3249/9368/6774/6935/4211/182/27067/639/1856/84465/2047/8412/79955/8516/1270/1735/2263/10818/50939/613/64072/7068/7855/1301/497189/197021/7474/121227/3791/668/5950/5595/5396/8820/2255/585/6…	260
BP	GO:0106106	cold-induced thermogenesis	146/16611	146/18800	1.31322e-08	5.93276e-07	3.95484e-07	79054/3566/2171/6778/33/93/1051/64641/50486/3600/9658/406/2827/51393/51316/5021/729230/7422/4857/25979/11096/2180/6850/115209/3226/338557/51043/5618/63976/26027/216/1621/8809/3717/8473/3397/3060/10912/5746/58488/3910/3662/1734/1376/7852/7090/2697/7099/7840/153/43/23028/4898/7030/1240/154/857/51087/55856/116/55818/7067/5565/2778/3953/5608/8929/85440/4012/9572/79602/10062/55366/948/3596/7350/3033/2…	146
BP	GO:0120161	regulation of cold-induced thermogenesis	146/16611	146/18800	1.31322e-08	5.93276e-07	3.95484e-07	79054/3566/2171/6778/33/93/1051/64641/50486/3600/9658/406/2827/51393/51316/5021/729230/7422/4857/25979/11096/2180/6850/115209/3226/338557/51043/5618/63976/26027/216/1621/8809/3717/8473/3397/3060/10912/5746/58488/3910/3662/1734/1376/7852/7090/2697/7099/7840/153/43/23028/4898/7030/1240/154/857/51087/55856/116/55818/7067/5565/2778/3953/5608/8929/85440/4012/9572/79602/10062/55366/948/3596/7350/3033/2…	146
BP	GO:0016358	dendrite development	227/16611	231/18800	1.32879e-08	5.96083e-07	3.97356e-07	916/7162/29882/51225/8577/54942/51473/9820/7940/7101/4205/9231/26258/57498/23242/1627/114788/23098/23181/7287/1826/51265/25/23316/815/124925/7224/7533/1399/11178/50488/4076/2932/55201/54664/85442/84062/2043/3251/3397/9856/8301/10371/6383/4131/29993/22871/27067/23237/2047/4776/5802/55619/100528062/26259/6792/9148/5911/10507/5764/10013/57468/10611/585/8829/10196/84816/4204/64284/5592/1136/57555/653…	227
BP	GO:0021700	developmental maturation	288/16611	296/18800	1.53961e-08	6.85825e-07	4.57179e-07	4057/7471/29842/10981/162466/29882/2069/30812/29887/3600/9985/163175/860/967/718/26258/83853/55612/712/2539/7422/11022/124925/116369/1003/64581/2185/11144/6900/7704/26468/63827/7042/650/4880/4825/23774/22859/152015/7534/8301/4131/2261/695/4776/9463/9148/168620/1258/10507/7855/11173/132141/4313/2697/7474/51360/3791/429/4653/6196/994/144347/23557/4747/23028/4204/59277/5745/6855/120892/26256/388552/…	288
BP	GO:0006401	RNA catabolic process	273/16611	280/18800	1.56999e-08	6.94501e-07	4.62963e-07	3669/4939/221662/9641/23034/56478/23185/57690/472/115572/3184/6556/7538/22794/7432/4848/162989/9567/10949/8570/6039/8241/677/57472/154197/2926/10492/57060/6832/65080/22882/54542/2107/10140/51538/22894/7133/26058/6036/4615/80153/4116/149041/5580/26019/79048/23644/55149/196513/10921/11340/54890/146857/114609/10940/27161/23369/4292/28960/4869/11044/3646/10758/27327/51010/9475/9924/2668/54555/9513/12…	273
BP	GO:0048863	stem cell differentiation	208/16611	211/18800	1.58373e-08	6.95605e-07	4.63698e-07	11051/10413/3214/221662/30812/5308/10443/55553/860/2487/8482/11166/10538/25/553115/117854/2932/2296/8463/7042/4300/29072/8320/6774/2335/2627/9723/1947/340665/182/10371/2103/6405/90/4902/3204/83959/23603/2263/10507/5764/657/8091/2668/9221/3357/11137/1482/6939/5595/8092/8820/2823/54517/8829/9739/100170841/8854/4089/2/1021/79918/223117/5978/10016/6664/678/9965/51755/23376/9698/5610/55818/3670/4222/3…	208
BP	GO:0050900	leukocyte migration	370/16611	384/18800	1.59432e-08	6.95605e-07	4.63698e-07	3552/3627/5919/10451/4478/4627/7130/3683/3958/8740/54210/23075/6288/4283/6373/5175/5293/11151/54209/56477/6504/5054/972/8764/5724/6714/1234/7226/1441/947/5155/4318/6777/5880/23765/3162/2920/6279/3672/729230/6352/646960/7422/7499/80024/140885/11035/131450/1399/6688/3675/6869/2358/7060/2621/5734/3383/727/2321/7424/2185/6850/64005/928/9435/3689/257144/1230/3679/682/7042/4615/9353/50512/30817/1621/56…	370
BP	GO:0042391	regulation of membrane potential	408/16611	425/18800	1.64766e-08	7.13986e-07	4.75951e-07	1829/2730/84941/23630/2897/1192/54209/8645/2745/2537/287/6548/348980/1134/55584/6714/23704/2903/10269/9630/6547/637/90134/80024/25/79594/6648/23316/124925/7224/7533/3783/153396/6869/5590/2185/1137/2932/2906/5023/3736/5831/2702/409/6328/57657/2564/5999/482/10142/2898/4092/3737/64208/134/55186/2900/6324/57369/817/3060/1135/476/666/9498/1268/6262/5350/2769/4355/6508/22871/4923/10008/9948/2281/9424/3…	408
BP	GO:0030217	T cell differentiation	257/16611	263/18800	1.69559e-08	7.29789e-07	4.86486e-07	259307/3552/84524/3566/7471/10288/6778/916/5293/914/941/3122/26191/10803/925/5971/3659/972/3600/114836/246778/64332/861/860/3702/5896/84695/91543/915/55636/8651/3718/6777/3140/10875/11221/1960/917/729230/23598/10538/3575/1493/25/11035/677/6688/5590/5734/3714/6932/864/6850/54542/602/9308/26279/10385/51043/10945/22890/56603/7704/5316/84433/1209/149041/3142/920/8809/8320/257101/6774/3146/4092/6935/1…	257
BP	GO:0048705	skeletal system morphogenesis	224/16611	228/18800	1.83867e-08	7.86062e-07	5.23998e-07	4057/3213/3214/7703/1281/6424/93/1277/162466/3215/3199/83452/55553/860/1101/10269/285973/2268/60676/3217/91355/3212/3227/4188/4664/1305/871/9249/57453/3198/1311/56603/2296/64651/4880/64399/29072/4665/3203/1954/3224/6935/7048/4209/2261/134701/3204/9968/2263/4323/1301/497189/9742/4313/27173/3200/3211/6939/8092/4522/5396/59338/3201/8692/79925/4256/144347/3638/23314/57560/3202/4087/10265/85301/4322/1…	224
BP	GO:0045860	positive regulation of protein kinase activity	381/16611	396/18800	1.89452e-08	8.0454e-07	5.36316e-07	1116/4057/10040/5154/5899/8826/1857/93/84722/2069/805/2013/9607/22943/3690/6714/6385/55890/55294/6556/5871/958/54757/6188/10253/8651/376497/904/5155/23411/148932/11235/959/1191/51429/6352/7422/25/11035/3937/8312/5590/2621/2321/2180/7424/2185/6850/353514/284/8322/6091/5618/7042/650/100133941/5580/51422/920/253260/3717/5311/2043/11211/4665/1946/7984/134/1236/114609/7048/11314/84254/1856/3491/1026/1…	381
BP	GO:0007015	actin filament organization	431/16611	450/18800	1.92607e-08	8.12522e-07	5.41636e-07	10395/23075/9113/11151/7408/1495/7170/2013/11346/6548/54942/4233/57619/6714/6385/7114/2039/8477/93663/79816/23607/7454/90668/822/5074/23242/5880/1627/51429/7018/25/2934/29109/23221/51019/4542/87/6869/339768/54961/5734/10096/84952/2185/7791/64005/146206/4641/9788/5345/7184/246176/9124/5295/57175/55971/9353/5999/5580/253725/9051/9873/91663/253260/3717/830/832/79822/51466/7984/11344/389/1236/3397/46…	431
BP	GO:0009895	negative regulation of catabolic process	314/16611	324/18800	1.95836e-08	8.18444e-07	5.45584e-07	4983/10919/7076/7471/57805/3077/221662/54209/23429/26191/9641/11011/2822/57103/4233/56478/23185/84074/115572/3184/2903/6556/7538/83547/11180/7432/3162/80317/9759/10949/32/6048/1981/819/8241/3240/27074/11178/2203/10492/10140/51538/29082/143941/5582/4615/6599/5768/3587/2043/79048/6774/8473/23450/56893/11345/134/4843/114609/64784/1268/80279/80772/336/10533/11044/10758/6872/54971/65018/2668/7248/5103…	314
BP	GO:0007156	homophilic cell adhesion via plasma membrane adhesion molecules	167/16611	168/18800	1.96581e-08	8.18444e-07	5.45584e-07	1829/1004/5175/56114/7216/10205/1826/1003/1951/57453/6900/6091/682/54798/133418/56105/347902/84623/56126/56138/56127/64072/65217/5819/54538/56100/26167/23654/1008/27328/56106/56109/634/29930/56133/56129/56112/23363/56110/3688/8641/53841/27020/1010/56145/56130/27253/56102/11122/56134/1828/54825/1006/22883/5291/1823/57863/5310/1012/57526/1048/6092/1013/222256/9499/5100/152330/56142/56147/3897/64403…	167
BP	GO:0140014	mitotic nuclear division	285/16611	293/18800	2.07056e-08	8.5646e-07	5.70926e-07	3552/10040/83987/84722/2069/54617/9985/6683/9585/9820/472/81565/23126/79598/5155/4733/858/5885/10744/29082/8658/79998/5347/79884/2059/4926/8379/54908/51203/126353/11044/3481/23383/49856/55719/10783/9587/1761/8243/3837/26013/55125/26993/152185/3835/23332/3796/3834/54443/54921/5902/1027/8452/7272/23172/283489/7756/80218/79643/91782/8260/10540/90990/23363/7273/10051/10735/55781/10274/56647/1062/5551…	285
BP	GO:0051258	protein polymerization	270/16611	277/18800	2.12406e-08	8.72919e-07	5.81898e-07	9113/84722/11151/7408/2242/54942/4233/7114/2039/157922/93663/6188/81565/7454/84282/822/23242/1627/4733/51429/25/2934/51019/1003/54961/2185/221074/117854/146206/29082/27124/51199/79998/55971/9353/10142/5580/253725/9051/9873/91663/253260/3717/830/832/79822/51466/11344/1236/55604/79778/3059/9050/2059/9026/4926/4131/343578/3071/6249/163782/24139/27229/85378/65018/246/64857/10844/55125/5879/4690/54434…	270
BP	GO:0051259	protein complex oligomerization	239/16611	244/18800	2.14169e-08	8.74523e-07	5.82967e-07	6999/27316/362/11051/92610/115362/9033/79792/27153/7408/197259/972/56652/241/6548/348980/6683/7226/84282/255022/6263/32/6648/2744/54968/8989/30844/3736/220/10056/1311/22890/9076/6247/9908/5961/84433/5551/5311/170850/1278/361/493829/3737/3251/57528/31/386617/51466/6857/64784/666/3748/4143/284252/4355/171425/54974/155061/57673/23237/80036/23627/3848/3788/3790/25923/1429/6506/7442/3123/79869/10730/3…	239
BP	GO:0043123	positive regulation of I-kappaB kinase/NF-kappaB signaling	186/16611	188/18800	2.33314e-08	9.46631e-07	6.31035e-07	4057/3552/10346/92610/843/841/684/3956/1936/6275/9641/6398/972/1653/51246/114769/10206/958/356/4919/3162/4055/80216/25/79594/85363/6737/11040/64581/7132/117854/57449/84433/4615/920/10475/8737/389/1236/114609/80833/3965/5987/9830/5966/8767/51135/3123/10758/81858/10783/9188/65018/7037/2697/3357/8743/9516/7099/1902/10542/2280/56674/84962/5579/51523/6366/10333/347734/54862/222643/8915/29110/387/64170…	186
BP	GO:0016485	protein processing	238/16611	243/18800	2.37935e-08	9.59269e-07	6.3946e-07	5327/4627/841/2152/5727/9508/715/7093/5054/5552/842/114769/1889/6714/861/2903/10269/11236/837/55851/51279/2934/840/1362/4285/3240/5328/831/115209/1522/6900/1311/5345/79094/5646/3249/27429/81555/8473/1803/60559/3818/64115/6281/23621/1514/8728/119587/8767/836/9718/147372/10730/8530/4323/2023/1520/2243/6196/5122/1368/3428/171389/64924/120892/136242/3083/23409/5251/5125/50846/83874/9528/29100/26005/2…	238
BP	GO:0002687	positive regulation of leukocyte migration	141/16611	141/18800	2.45099e-08	9.81936e-07	6.5457e-07	3552/3627/5919/3958/8740/23075/54209/6504/5054/972/8764/5724/5880/729230/6352/646960/7422/7499/6688/6869/2358/7060/2621/3383/7424/2185/1230/6846/3146/1236/114609/6693/3965/2277/4192/6364/83483/5025/3071/5764/4323/3576/6403/5879/7474/5595/1436/2526/7784/811/57402/1240/79647/9943/3570/83700/6366/8784/51561/10059/10488/81704/387/6351/1435/177/8174/23604/2155/196527/5228/6354/9750/6387/64805/1906/637…	141
BP	GO:0032970	regulation of actin filament-based process	378/16611	393/18800	2.46704e-08	9.82189e-07	6.54738e-07	3552/5154/10630/4627/10395/1829/23075/9113/8826/684/51225/11151/7408/2242/11346/287/6548/54942/4233/6385/7114/2039/8477/7226/93663/23607/7454/90668/822/5880/1627/51429/128272/25/2934/29109/23221/58527/6869/54961/5734/84952/2185/146206/9788/2702/5345/5295/57175/55971/23433/9353/5999/10142/5580/253725/9873/91663/253260/830/11211/397/832/1946/79822/51466/7984/134/11344/389/1236/3397/55604/3059/817/9…	378
BP	GO:0006470	protein dephosphorylation	283/16611	291/18800	2.52154e-08	9.87501e-07	6.5828e-07	10288/10395/79442/3958/23075/54935/26191/5522/23645/805/132160/10076/5509/84152/55291/7529/26051/5777/11221/1847/84867/3672/8776/1827/1845/5784/1003/23399/54961/1844/84919/2139/2932/9562/57552/26469/7184/23239/5580/28227/3717/150290/11072/134/8073/11314/55313/5533/5516/128853/57460/2281/5802/3071/5778/92609/5500/5507/79705/9475/65018/7248/11266/4690/8897/152926/5770/54434/5774/51496/5475/9829/630…	283
BP	GO:0006486	protein glycosylation	221/16611	225/18800	2.54239e-08	9.87501e-07	6.5828e-07	11227/29906/2528/2591/3600/93010/8693/6482/114805/23333/57134/56913/144245/2523/55757/160418/54790/51172/6184/2218/11320/79796/11226/283464/2530/83857/160335/10678/84061/55858/2527/374907/8473/200424/29071/2650/256435/440138/80312/56052/4245/22906/4121/283417/20/64116/2134/2673/51301/84752/79695/2590/9761/6487/79070/145173/84620/10690/140687/170384/256281/91319/727936/84197/2526/29954/79053/79947…	221
BP	GO:0043413	macromolecule glycosylation	221/16611	225/18800	2.54239e-08	9.87501e-07	6.5828e-07	11227/29906/2528/2591/3600/93010/8693/6482/114805/23333/57134/56913/144245/2523/55757/160418/54790/51172/6184/2218/11320/79796/11226/283464/2530/83857/160335/10678/84061/55858/2527/374907/8473/200424/29071/2650/256435/440138/80312/56052/4245/22906/4121/283417/20/64116/2134/2673/51301/84752/79695/2590/9761/6487/79070/145173/84620/10690/140687/170384/256281/91319/727936/84197/2526/29954/79053/79947…	221
BP	GO:0060348	bone development	221/16611	225/18800	2.54239e-08	9.87501e-07	6.5828e-07	4057/8840/7471/3214/1281/6424/1277/162466/29887/54808/5308/6714/860/1101/55294/10269/285973/60676/5777/91355/8111/633/4664/1305/4015/871/79648/5734/9249/10859/1311/56603/2296/7704/7468/4090/80169/650/4880/4665/1954/2313/4211/7048/4209/2261/134701/79705/2263/10507/10234/55959/4323/497189/11173/2697/51360/25946/3791/7305/4653/2033/144347/7066/3638/57560/5251/2648/6261/80739/10682/85301/4322/1280/27…	221
BP	GO:0031589	cell-substrate adhesion	351/16611	364/18800	2.71211e-08	1.04704e-06	6.97969e-07	1295/10630/7471/3683/10395/255743/10225/9358/1281/916/1277/11151/29780/56477/5054/2013/7205/6548/3690/6714/6385/3913/2039/7007/81848/8631/4059/967/947/6239/2633/10319/5155/5880/83706/55612/285613/7450/3672/2523/10516/7422/1305/25/9480/1399/50509/1845/87/3675/5590/2621/2192/5328/2185/7791/50488/22854/64005/3681/2932/1842/3678/3689/284/8322/3679/5295/482/56999/253725/54749/91663/3717/1946/3684/2335…	351
BP	GO:0033157	regulation of intracellular protein transport	220/16611	224/18800	2.83194e-08	1.08672e-06	7.24417e-07	340146/1263/55741/10023/9585/3429/2039/10134/54471/55294/51128/81565/5880/89781/55612/11235/10956/29969/56947/5784/2621/23379/2932/4641/9747/3689/284/3208/5295/6672/5580/80184/3717/27429/3684/7327/51100/79778/3059/285966/9818/4946/160140/51614/118424/3458/51366/65018/7855/9221/5770/55696/51496/91319/6934/8692/120892/2810/3638/9024/2064/1459/89866/11142/11315/56850/9520/3753/3265/2040/27113/51201/…	220
BP	GO:0016049	cell growth	462/16611	484/18800	2.96831e-08	1.13222e-06	7.54752e-07	10413/214/8826/57805/684/84722/29946/29882/6696/7490/56994/8835/54617/5931/6548/3488/84678/57817/3913/2487/6586/60676/81565/4099/8482/51393/9211/23242/6195/1627/23411/84289/8904/6279/2539/10516/8437/7422/1826/51265/1981/25/79594/7224/185/1154/7251/1399/7003/6197/5590/2185/2203/6832/56924/2932/6494/51199/7042/221476/9353/5999/9576/4825/3249/1946/51616/4092/5167/1954/6857/2335/6597/11344/6049/1535/…	462
BP	GO:0002263	cell activation involved in immune response	281/16611	289/18800	3.06954e-08	1.15605e-06	7.70638e-07	51111/3566/3683/6778/3958/23075/3956/5293/11151/5450/54209/2242/930/9111/941/3122/6504/5971/972/640/2213/114836/5873/5724/246778/64332/202309/6556/84695/958/5730/2268/54537/6482/3718/5777/3430/5880/10875/3162/8741/959/729230/10538/54518/25/4064/6688/3916/5590/5734/3383/64581/2185/1776/6850/54542/602/10859/3689/2623/51043/2896/284021/7468/4615/149041/3142/8673/30817/8809/8320/257101/6774/3146/2352…	281
BP	GO:0007623	circadian rhythm	202/16611	205/18800	3.08522e-08	1.15605e-06	7.70638e-07	80045/445/57805/9607/5971/3184/196/55294/5730/406/26258/1454/23411/1960/4547/90134/5158/8553/5936/6096/83759/2932/5582/112464/23239/92369/4841/23596/8473/3737/134/4843/3397/6478/22871/10533/10743/5500/2673/9475/4783/10514/7874/153/50865/1859/3172/3062/79365/2033/55269/150094/3066/6421/22992/463/26233/3727/10135/60675/1628/9975/54551/5563/6715/6839/7337/64839/3400/2155/9575/55336/9572/5371/55124/1…	202
BP	GO:0044703	multi-organism reproductive process	202/16611	205/18800	3.08522e-08	1.15605e-06	7.70638e-07	7076/150921/6696/8061/2013/3488/5724/7026/79816/4318/2354/6777/5021/7216/7056/23764/259/7422/6863/3485/81671/3675/6869/2192/7005/8398/3678/5023/5618/682/23780/64750/397/361/10876/3490/7048/3965/3291/5680/1268/27161/639/1508/6833/7004/7421/5764/151/4313/6866/2697/5467/100506013/54361/100137049/53405/811/55870/5125/796/84868/10991/6573/5671/1307/2488/412/6513/54407/23641/133/4693/285/116/1828/596/2…	202
BP	GO:0043434	response to peptide hormone	388/16611	404/18800	3.12282e-08	1.16201e-06	7.74612e-07	5327/5919/7076/7471/6272/445/6778/1281/9518/1277/6431/2069/8835/2822/760/6548/64900/3488/6714/84709/6464/56729/81565/1545/8651/376497/3718/1395/6777/23411/9365/54328/5021/5106/54206/815/858/677/185/5590/388581/2645/2203/2932/4641/132864/51043/9021/57085/682/5295/55971/23433/376267/6599/4825/5580/6772/3717/6774/8473/9882/493829/5167/1583/8013/1535/3645/847/2650/3030/3291/4131/1176/4067/286753/8412…	388
BP	GO:0060249	anatomical structure homeostasis	309/16611	319/18800	3.14702e-08	1.16201e-06	7.74612e-07	4057/4938/10413/1281/5175/11151/6696/25937/29887/9607/9545/3690/55277/1134/4846/6714/57817/285331/60/947/12/4117/3908/3635/23746/729230/7287/7422/4015/7018/8842/3920/143689/3315/286204/1003/65267/58476/2185/6850/5023/2623/284/1311/9076/26058/2296/9153/1200/216/482/4982/171392/4069/53832/31/4588/134/23154/51599/317719/7128/2103/653781/1268/282809/57333/3848/5025/6833/1073/1258/79705/115861/64116/7…	309
BP	GO:0006302	double-strand break repair	266/16611	273/18800	3.1741e-08	1.16201e-06	7.74612e-07	51111/83666/79728/54799/158880/54617/115004/80314/26122/1653/9985/55693/10933/472/60/54537/7454/23126/27343/64210/5885/7486/11144/51720/6944/7468/10524/29072/57634/3146/5980/56893/5422/23347/11077/1161/4292/51366/11044/55719/55100/10111/8091/196528/6119/149840/79913/23028/3980/51567/7528/6421/151636/254225/22992/197342/85456/147872/4255/8607/51444/7415/56916/80010/84309/92797/3148/78990/8089/6411…	266
BP	GO:0043270	positive regulation of ion transport	266/16611	273/18800	3.1741e-08	1.16201e-06	7.74612e-07	3552/6769/3627/3958/4283/6373/23630/1051/54209/930/219527/805/2745/287/6548/5724/7114/5321/4638/51393/3718/5155/4302/144245/2539/729230/6352/8564/25/815/81671/10268/7466/3783/65267/6865/8398/5023/3736/353514/9747/1230/409/5031/482/10142/8673/389816/6347/84062/5311/9368/187/6857/134/54997/11027/6324/3060/22925/9536/6262/4923/23237/7220/3458/22953/5025/162514/6833/6717/65018/9001/2847/2668/1520/586…	266
BP	GO:0042098	T cell proliferation	201/16611	204/18800	3.44702e-08	1.25472e-06	8.36409e-07	259307/3552/4478/10288/3958/8740/916/79679/1051/11151/923/941/26191/6504/3659/8764/3600/246778/6385/6556/9231/6188/3718/5777/6777/5074/5880/64926/868/959/729230/6352/1493/25/11035/3133/3485/23308/3115/6850/54542/1604/26279/10859/10385/10457/7133/51043/84433/100133941/149041/970/3717/3146/6541/23240/7048/6693/284194/3965/977/1947/64115/80380/7535/8379/384/2281/8767/836/3071/3481/3123/7293/57045/94…	201
BP	GO:0019932	second-messenger-mediated signaling	294/16611	303/18800	3.47626e-08	1.25578e-06	8.37118e-07	79054/11123/916/54209/29995/115004/10803/10486/2274/805/287/6548/4846/2039/1234/55784/10134/7226/196/2903/10269/2357/3000/2633/2827/79041/4935/10523/729230/358/7422/23551/185/1827/2358/51555/64581/2185/6850/338557/2932/2906/83873/1230/3208/10663/2829/4880/920/10316/187/1233/9034/22859/4843/1236/817/5533/6262/5350/7535/6364/695/2281/4776/136/4773/22953/5025/8445/3269/168620/7462/2696/7852/576/1232…	294
BP	GO:0007265	Ras protein signal transduction	335/16611	347/18800	3.48937e-08	1.25578e-06	8.37118e-07	5924/10630/4983/10395/1281/5899/9411/27128/83452/57381/4233/81848/8477/9265/23550/9402/10253/6239/7454/55333/5880/64926/5867/8437/25/185/1399/10211/3675/2203/10252/6091/57449/9908/84636/25780/7042/376267/57493/57221/10161/397/401387/1278/8473/221002/11337/152015/27334/22898/79930/5516/2059/29984/57646/117178/3707/10256/1026/27/22808/8878/9649/6237/388/64283/9475/5911/440730/399/613/3837/5879/2595…	335
BP	GO:0001558	regulation of cell growth	398/16611	415/18800	3.87663e-08	1.38731e-06	9.24797e-07	10413/57805/684/84722/29946/29882/6696/7490/56994/8835/54617/5931/6548/3488/84678/57817/2487/6586/60676/81565/4099/8482/51393/9211/6195/1627/23411/84289/6279/2539/10516/8437/7422/1826/51265/1981/25/79594/7224/185/1154/7251/1399/7003/6197/2185/2203/6832/2932/6494/7042/221476/9353/5999/4825/3249/1946/51616/4092/5167/1954/6857/2335/6597/11344/6049/1535/9856/3490/817/9723/10371/6405/6280/4131/23136/1…	398
BP	GO:0070663	regulation of leukocyte proliferation	248/16611	254/18800	4.26978e-08	1.51947e-06	1.0129e-06	259307/3552/10451/10288/3958/684/916/79679/1051/11151/923/941/26191/6504/3659/972/640/8764/3600/2213/246778/6385/472/4332/7940/196/958/9231/6188/22806/3718/128506/5777/6777/5074/5880/64926/868/959/3635/729230/6352/1493/11035/3133/3485/6869/23308/3115/23495/6850/1604/26279/10859/10385/10457/7133/51043/84433/4615/100133941/149041/970/3717/3146/23529/6541/23240/114609/7048/6693/284194/3965/1947/1131…	248
BP	GO:0002366	leukocyte activation involved in immune response	277/16611	285/18800	4.54334e-08	1.60784e-06	1.0718e-06	51111/3566/3683/6778/3958/23075/3956/5293/11151/5450/54209/2242/930/9111/941/3122/6504/5971/972/640/2213/114836/5873/5724/246778/64332/202309/6556/84695/958/5730/2268/54537/6482/3718/5777/3430/5880/10875/3162/8741/959/729230/10538/54518/25/4064/6688/3916/5590/5734/3383/64581/2185/1776/6850/54542/602/10859/3689/2623/51043/2896/284021/7468/4615/149041/3142/8673/30817/8809/8320/257101/6774/3146/2352…	277
BP	GO:1903706	regulation of hemopoiesis	357/16611	371/18800	5.06597e-08	1.78153e-06	1.18759e-06	4057/259307/84524/7130/3566/10288/841/1051/54209/914/2242/941/3122/9607/3659/972/3600/2213/246778/64332/861/55365/5896/55294/84695/1441/29909/7538/22806/8651/6988/3718/128506/5777/6777/10875/11221/1960/8111/3635/729230/4015/3575/1493/25/677/6688/5590/2621/11025/2185/121504/6932/864/6850/54542/9308/10859/10385/2623/51043/1230/22890/56603/7704/5295/84433/1209/149041/3142/171392/6772/920/56833/25710…	357
BP	GO:0006887	exocytosis	344/16611	357/18800	5.0901e-08	1.78153e-06	1.18759e-06	4627/3566/5899/5293/11151/2242/83452/640/9545/2213/84958/5873/5724/54843/6385/2039/23086/5730/2268/26258/7447/3993/5880/3162/729230/6352/7251/6688/3916/8676/51019/91683/55503/6850/64005/8398/2932/5023/3689/2623/1230/284021/5582/91828/376267/8673/30817/10972/84062/9146/493829/3684/6857/3598/8013/3965/4818/11314/23621/9145/9498/1268/63908/22871/695/2294/200081/4067/286753/63910/136/3458/3071/94120/…	344
BP	GO:0002685	regulation of leukocyte migration	214/16611	218/18800	5.39988e-08	1.87963e-06	1.25298e-06	3552/3627/5919/4478/7130/3958/8740/23075/54209/56477/6504/5054/972/8764/5724/5880/3162/729230/6352/646960/7422/7499/80024/11035/131450/1399/6688/6869/2358/7060/2621/5734/3383/727/7424/2185/928/9435/257144/1230/4615/9353/56833/6347/6846/3146/134/1803/1236/114609/6693/3965/11314/2277/4192/6364/79890/83483/4067/5025/3071/3204/27202/5764/399/4681/613/4323/3576/6403/5879/7474/100528032/10690/5595/1436…	214
BP	GO:1990845	adaptive thermogenesis	158/16611	159/18800	5.73877e-08	1.98674e-06	1.32438e-06	79054/3566/2171/6778/33/93/1051/64641/50486/3600/9658/406/2827/51393/51316/5021/729230/7422/4857/25979/11096/2180/6850/115209/3226/338557/51043/5618/63976/26027/216/1621/8809/3717/8473/3397/3060/10912/5746/58488/3910/3662/1734/7442/1376/7852/7090/2697/291/7099/7840/153/43/23028/4898/7030/1240/154/857/51087/55856/116/55818/7067/5565/2778/3953/5608/8929/85440/4012/9572/79602/10062/55366/948/3596/73…	158
BP	GO:0001763	morphogenesis of a branching structure	196/16611	199/18800	5.99436e-08	2.064e-06	1.37589e-06	5154/10413/7471/255743/5727/7490/1969/30812/4233/6714/9231/10253/3217/2719/91355/23129/7422/1305/25/10252/1522/25932/9021/650/9353/64399/29072/5311/5087/7048/3237/9723/10371/340419/4192/639/2294/4776/90/10653/7075/374/7421/2263/10818/7855/2668/4323/7474/3791/2252/55727/151449/84870/2255/8829/54361/4609/59277/120892/3202/2736/10481/57142/4089/54567/3611/6926/6692/80004/1746/26585/133/1435/11331/59…	196
BP	GO:0010720	positive regulation of cell development	288/16611	297/18800	6.18136e-08	2.11695e-06	1.41118e-06	23440/5176/5624/63950/29882/30812/2039/9820/6239/81565/4099/8482/140578/51393/1627/23129/170825/8111/7422/1826/10636/51265/25/5583/23316/7224/1399/5324/1003/64581/7424/4076/443/7133/6091/51199/650/9353/4825/91663/10221/2043/1946/23529/4092/1954/2335/11344/5034/55604/84504/6281/10215/4131/4192/27067/627/4067/3458/4352/100528062/3987/26259/6792/9148/7852/10507/5764/9001/3572/10979/5879/7097/7305/64…	288
BP	GO:0030073	insulin secretion	177/16611	179/18800	6.53792e-08	2.22709e-06	1.4846e-06	93/9607/640/2822/7226/406/3170/7447/91355/8111/4826/5106/6352/80024/388581/2645/8398/415116/4825/3717/1946/4843/6755/5007/1268/57818/2281/3458/25874/9463/51167/6833/3123/2696/6717/54097/6659/5950/54795/240/5467/3172/6934/5894/51714/6616/57555/23409/90007/2852/9024/4087/7425/26154/9066/2850/55088/11315/5978/7200/51768/65985/11069/5071/116/6814/3670/4041/5715/51083/5530/130399/818/5213/3382/4760/36…	177
BP	GO:0032944	regulation of mononuclear cell proliferation	228/16611	233/18800	6.78193e-08	2.29792e-06	1.53182e-06	259307/3552/10451/10288/3958/916/79679/1051/11151/923/941/26191/6504/3659/972/640/8764/3600/2213/246778/6385/472/4332/7940/196/958/9231/6188/22806/3718/5777/6777/5074/5880/64926/868/959/3635/729230/6352/1493/11035/3133/3485/6869/23308/3115/23495/6850/1604/26279/10859/10385/10457/7133/51043/84433/4615/100133941/149041/970/3717/3146/23529/6541/23240/114609/7048/6693/284194/3965/1947/11314/64115/803…	228
BP	GO:0031330	negative regulation of cellular catabolic process	258/16611	265/18800	7.05509e-08	2.37783e-06	1.58509e-06	4983/10919/7076/7471/57805/3077/221662/54209/23429/26191/9641/11011/2822/57103/4233/56478/23185/84074/115572/3184/6556/7538/11180/7432/3162/80317/10949/32/6048/1981/819/8241/3240/27074/11178/10492/10140/51538/29082/143941/5582/4615/6599/5768/3587/2043/79048/6774/8473/56893/11345/114609/1268/80279/80772/10533/11044/10758/6872/65018/2668/7248/51035/3357/3834/7874/23049/5774/23274/166863/120892/341/…	258
BP	GO:0032886	regulation of microtubule-based process	243/16611	249/18800	7.10885e-08	2.38333e-06	1.58876e-06	92749/25790/84722/64147/2242/57542/4233/6683/25876/157922/3476/6188/79598/4744/4733/23411/1540/25/8045/51072/79809/3916/8701/79648/6869/1003/6865/221074/2932/29082/27124/246176/26054/51199/79998/5347/10142/55201/79884/23299/1946/50632/118611/4926/4131/85478/2042/10263/4869/6249/26146/10432/225689/24139/9475/79969/9001/10013/23187/338657/132141/152185/5879/23332/91147/7840/57662/402/1859/636/585/5…	243
BP	GO:0070997	neuron death	340/16611	353/18800	7.27712e-08	2.41463e-06	1.60962e-06	5176/7471/841/2730/1051/11151/54209/1728/22943/27324/57103/2213/6548/6477/842/51604/84678/472/7226/55294/947/4099/356/23411/637/3162/712/23098/3672/2539/1191/6352/8564/1981/25/6648/840/131450/7224/7466/2185/1522/2932/163/135112/29082/3689/10457/7133/2896/284/409/5582/7042/4841/6347/84062/3717/1948/27429/219699/2898/23529/3684/134/8013/4852/8301/23621/10570/666/4192/155061/2047/627/4776/3458/10052…	340
BP	GO:1903364	positive regulation of cellular protein catabolic process	156/16611	157/18800	7.278e-08	2.41463e-06	1.60962e-06	4478/54209/1263/1075/57817/10134/55294/6613/11236/1454/51257/1191/79589/149628/160418/5701/8312/2185/5704/9604/8975/2932/51343/127544/5347/10221/4092/11337/7128/4287/84871/26259/6872/10399/20/255488/440730/55743/153769/91445/5706/120892/26263/7805/91304/7430/1050/857/7415/3320/90637/26471/29979/2332/7917/64110/3303/5071/2629/55737/51136/1950/23640/26234/131377/10425/4036/2931/4780/57761/122809/34…	156
BP	GO:0007611	learning or memory	257/16611	264/18800	7.79233e-08	2.57187e-06	1.71444e-06	5176/10919/10288/7162/1051/54209/8061/123803/22943/84152/5896/2903/5153/26258/6547/7432/5021/10636/25/23316/1827/8701/3675/6869/5590/6865/55450/56924/8398/6900/3678/64220/143941/5582/1621/84062/10716/4593/8301/8484/1268/4192/4923/23237/627/4776/100528062/836/7143/6833/8516/5575/3269/139411/23657/8326/5764/7248/497189/57468/567/7097/25946/2033/84197/4986/6616/4204/4137/6543/2648/2019/80863/577/368…	257
BP	GO:0006650	glycerophospholipid metabolic process	299/16611	309/18800	8.06442e-08	2.63438e-06	1.75611e-06	5154/5322/2171/5359/5320/151056/5293/56994/8835/1040/2822/55650/23167/8395/10908/51604/3613/472/5321/27163/10026/80157/8651/376497/145447/84803/54979/5155/80271/55326/150763/3635/54675/8776/114884/1154/25979/3990/126969/133121/8398/26279/9021/27124/5295/284161/55300/55224/8525/22876/3030/284486/80055/3707/336/79575/11145/2181/80235/5297/246/79153/5277/10380/3612/3931/8526/146850/3357/8897/8821/57…	299
BP	GO:0071496	cellular response to external stimulus	299/16611	309/18800	8.06442e-08	2.63438e-06	1.75611e-06	10631/440738/10919/51520/84557/8740/841/79792/5899/3178/1277/55062/8061/2242/57535/9607/3659/3600/6548/55630/51311/958/10325/8131/3170/4099/23411/3162/4055/358/79726/4330/1981/3920/389493/643246/51284/2621/5734/7486/7132/432/84219/6494/81788/4615/51422/154743/7378/11337/11345/51100/1535/1026/7100/4067/136/10533/28960/220441/9463/2308/6506/168620/27327/9780/7421/838/1965/7248/8897/53632/25828/2595…	299
BP	GO:0008202	steroid metabolic process	312/16611	323/18800	8.45398e-08	2.74754e-06	1.83154e-06	3552/23461/33/10449/8542/51302/6696/174/8856/27122/1571/1545/6777/23411/2539/1066/185/7533/2053/3990/10577/114880/4779/51706/8720/56603/5618/2224/23780/650/57540/23541/51422/8630/114876/5087/64137/84650/1583/3490/5007/847/340665/3291/476/866/338/336/340895/3458/51700/120227/2230/20/427/3931/27120/51360/26119/5467/59338/6799/1592/54361/51171/4204/341/3638/706/114883/7367/653/1585/50846/1582/55911/…	312
BP	GO:0016032	viral process	400/16611	418/18800	9.21078e-08	2.96708e-06	1.97789e-06	4057/4938/3669/10346/23601/4939/83666/5359/60489/684/3956/10410/1969/941/55741/6504/972/8764/3690/3429/1234/4940/131578/10206/91543/7538/6482/904/8547/55065/84875/200316/1656/6352/8638/4684/2934/858/85363/29969/185/7251/6737/3916/2621/27074/3383/55337/286827/51386/64135/11320/117854/1604/2932/7023/3678/9140/2530/29082/3054/9076/10581/682/200315/10663/5806/6772/8673/920/6347/10475/1948/3249/3665/6…	400
BP	GO:0044706	multi-multicellular organism process	209/16611	213/18800	9.22453e-08	2.96708e-06	1.97789e-06	7076/150921/6696/8061/2013/3488/5724/7026/79816/4318/2354/6777/5021/7216/7056/23764/259/7422/6863/3485/81671/3074/3675/6869/2192/7005/8398/3678/5023/5618/682/23780/64750/64518/397/361/57095/10876/3490/7048/3965/3291/5680/1268/27161/639/1508/6833/7004/7421/5764/151/27120/4313/6866/2697/5467/100506013/54361/100137049/53405/811/55870/5125/796/84868/10991/6573/5671/1307/2488/412/6513/54407/23641/133/…	209
BP	GO:0050670	regulation of lymphocyte proliferation	225/16611	230/18800	9.2692e-08	2.96708e-06	1.97789e-06	259307/3552/10451/10288/3958/916/79679/1051/11151/923/941/26191/6504/3659/972/640/8764/3600/2213/246778/6385/472/4332/7940/196/958/9231/6188/22806/3718/5777/6777/5074/5880/64926/868/959/3635/729230/6352/1493/11035/3133/3485/6869/23308/3115/23495/6850/1604/26279/10859/10385/10457/7133/51043/84433/4615/100133941/149041/970/3717/3146/23529/6541/23240/114609/7048/6693/284194/3965/1947/11314/64115/803…	225
BP	GO:0030099	myeloid cell differentiation	375/16611	391/18800	9.51967e-08	3.03201e-06	2.02118e-06	4057/8840/4627/23601/7130/841/1051/5293/54209/1969/2242/29887/9607/5971/972/3600/842/6714/861/2039/3696/126014/55294/1441/29909/7538/5153/10320/6988/3718/128506/3217/4318/5777/2719/6777/23411/8111/4055/3635/2539/7994/10538/7422/4015/8444/7018/116071/10100/1943/54790/677/55904/6688/87/25979/11025/2185/121504/10859/23054/2623/1230/94081/7704/5295/5316/4090/171392/6772/920/3717/10221/6774/8737/13522…	375
BP	GO:1903320	regulation of protein modification by small protein conjugation or removal	240/16611	246/18800	9.64105e-08	3.0554e-06	2.03676e-06	83593/9111/26191/55294/54765/6188/10253/84875/868/9759/23551/819/25/79594/150678/7466/553115/6737/8312/9733/51343/143941/284/409/5582/5347/6167/92369/8473/79139/4092/11337/26232/6478/7128/80279/8767/51366/8878/6872/55100/65018/6659/51035/55743/56160/150684/153769/85453/378884/254170/10196/8452/23028/120892/55208/2280/706/339745/151636/7805/25950/6201/10625/648/857/7415/3320/378708/7375/11315/1001…	240
BP	GO:1903039	positive regulation of leukocyte cell-cell adhesion	239/16611	245/18800	1.06695e-07	3.3646e-06	2.24288e-06	259307/3552/3566/10288/8740/916/79679/3956/921/11151/923/3127/941/3122/26191/6504/55423/972/8764/3600/5724/6714/64332/861/3118/5896/8631/6188/8651/3718/5777/6777/11221/64926/1960/10326/959/729230/6352/3575/140885/3133/3485/5590/3119/23308/3115/864/6850/9308/1604/10859/9435/3689/10385/51043/22890/7704/84433/100133941/3108/3142/920/970/6347/3717/1948/3146/6541/1803/1236/8013/7048/3965/9840/1947/641…	239
BP	GO:0018212	peptidyl-tyrosine modification	361/16611	376/18800	1.08227e-07	3.37946e-06	2.25278e-06	5154/55024/83666/1489/916/5175/54209/1969/2069/2242/2202/941/972/640/8764/3600/3690/4233/3595/6714/6464/2039/3702/55294/958/2268/9961/8651/3718/5155/5777/54625/4919/868/6352/54206/7422/8444/25/7251/7060/5590/2621/2321/64581/2185/30844/6850/7132/3678/353514/3689/2623/284/9021/409/5618/100133941/5580/920/253260/3717/2043/1946/23529/55359/134/22876/4593/3645/3059/5007/11314/1196/7535/1856/2261/695/2…	361
BP	GO:1902903	regulation of supramolecular fiber organization	361/16611	376/18800	1.08227e-07	3.37946e-06	2.25278e-06	165/10395/23075/9113/84722/11151/54209/7408/2242/11346/6548/54942/4233/6683/6385/7114/25876/2039/8477/157922/93663/6188/7454/90668/822/1627/4733/1191/51429/25/2934/29109/6869/1003/54961/5734/84952/2185/221074/146206/9788/5345/27124/5295/57175/51199/79998/55971/9353/5999/10142/5580/253725/55201/9873/91663/253260/830/832/79822/51466/7984/11344/389/1236/3397/55604/3059/6281/2059/9026/4926/4131/34357…	361
BP	GO:2001022	positive regulation of response to DNA damage stimulus	129/16611	129/18800	1.09506e-07	3.40269e-06	2.26827e-06	51111/83666/57805/54799/80314/26122/57103/55693/10933/472/60/6188/51776/54537/7454/23126/23411/64210/149628/2139/51720/161742/6944/9774/5582/10524/54780/5580/57634/3146/23347/22925/55719/8091/196528/9513/25946/2255/4609/149840/5366/150275/151636/200734/4255/8607/5883/1054/2332/8089/23201/3090/112441434/8087/84787/27063/4824/55183/10459/55135/23514/2187/441161/2021/6154/2140/9643/9577/142/64769/10…	129
BP	GO:0042770	signal transduction in response to DNA damage	172/16611	174/18800	1.15633e-07	3.57563e-06	2.38356e-06	7471/57805/79858/1263/972/842/472/10269/51776/23411/637/10538/8444/25/149628/602/9656/27330/51343/7023/51720/161742/26270/5514/26058/10524/6672/5347/9100/22925/80279/57646/79915/1026/988/84126/6659/8091/25946/1859/56950/1027/5366/23028/60561/7919/9344/197342/200734/54465/55702/7508/79791/51322/51065/5883/4582/6118/3090/8555/1112/4646/27063/26272/9575/10459/163859/2177/5371/11200/57551/51499/38789…	172
BP	GO:0015711	organic anion transport	347/16611	361/18800	1.21794e-07	3.74797e-06	2.49844e-06	3552/5322/56301/5320/81031/8714/340146/10861/366/5321/624/376497/55065/55867/57282/162515/4547/255022/60386/1066/8564/89874/391013/116369/29957/6850/23539/8398/26279/353189/114789/51706/94081/8273/9121/9056/5999/7355/84062/9368/6541/134/387700/2917/4843/8884/133418/222642/22925/9536/9122/9498/83546/6508/23428/4923/57835/123096/80772/63910/25874/51167/5025/51700/7223/6506/7442/84889/6567/23657/839…	347
BP	GO:1901652	response to peptide	467/16611	491/18800	1.26874e-07	3.88552e-06	2.59013e-06	5176/5327/5919/7076/7471/6272/445/6778/1281/9518/1277/6431/54209/2069/8835/26191/2822/760/2213/6548/64900/3488/6714/84709/6464/56729/81565/1545/8651/376497/3718/1395/4318/6777/23411/837/9365/54328/5021/5106/54206/815/858/677/10268/185/2358/5590/3383/388581/2645/2203/2932/4641/132864/51043/9021/57085/682/5295/55971/23433/376267/6599/4825/4314/5580/6772/3717/2043/6774/8473/9882/493829/5167/1583/801…	467
BP	GO:0051960	regulation of nervous system development	420/16611	440/18800	1.28456e-07	3.91515e-06	2.60989e-06	23440/3213/5176/10413/1890/63950/7162/29882/6696/54209/30812/1495/22943/163175/1075/9820/7101/389549/9231/55636/406/81565/4099/8482/140578/51393/11221/1627/23129/5021/170825/8553/7422/1826/10636/51265/5583/23316/27286/7224/79953/7533/5324/7424/84376/4076/443/55502/7133/6091/26508/51199/650/9353/4825/139065/2043/1946/23529/55695/1954/2335/11344/6049/3397/9856/84504/9723/10371/6405/10215/4131/4192/…	420
BP	GO:0007626	locomotory behavior	189/16611	192/18800	1.2964e-07	3.93241e-06	2.62139e-06	4887/123803/163175/4886/84152/10269/1476/5153/55636/257194/26258/3170/57282/1826/23551/6648/124925/3074/1827/55283/56924/6900/2906/220/6414/8322/409/26058/1621/55084/2043/27429/3251/5090/1803/4211/22876/2059/4923/7143/20/64072/2668/7248/25946/4986/551/6616/4204/1136/57555/120892/51168/51185/463/2019/127343/11315/55079/7200/26090/9698/7337/80208/5071/89797/5538/9293/55737/6623/3084/29801/54982/989…	189
BP	GO:0006282	regulation of DNA repair	151/16611	152/18800	1.31722e-07	3.97663e-06	2.65087e-06	51111/83666/54799/158880/115004/80314/26122/57103/55693/10933/60/6188/54537/7454/23126/23411/64210/2139/51720/6944/5582/7468/10524/29072/57634/3146/56893/23347/1161/7014/51366/55719/11143/8091/5429/196528/2255/56897/149840/23028/150275/151636/254225/4255/8607/84309/1054/92797/78990/8089/64110/23201/6118/112441434/63979/84787/1025/55183/10459/5371/55135/23514/2187/441161/7158/55086/2140/9643/5888/…	151
BP	GO:0015849	organic acid transport	307/16611	318/18800	1.33663e-07	4.01619e-06	2.67724e-06	3552/5322/2171/56301/5320/8714/5947/10861/366/2806/5321/624/376497/3993/162515/7504/8564/89874/391013/116369/2180/6850/6545/23539/8398/26279/788/94081/8273/9056/5999/84062/9368/6541/134/2917/8884/133418/222642/22925/9536/5948/23428/4923/123096/80763/25874/5025/7223/2181/6506/7442/84889/1376/6567/23657/116362/118980/1836/6533/2352/2697/11000/6754/5467/206358/10166/123/253512/4609/551/6540/83758/51…	307
BP	GO:0018108	peptidyl-tyrosine phosphorylation	358/16611	373/18800	1.40042e-07	4.18227e-06	2.78795e-06	5154/55024/83666/1489/916/5175/54209/1969/2069/2242/2202/941/972/640/8764/3600/3690/4233/3595/6714/6464/2039/3702/55294/958/2268/9961/8651/3718/5155/5777/54625/4919/868/6352/54206/7422/8444/25/7251/7060/5590/2621/2321/64581/2185/30844/6850/7132/3678/353514/3689/2623/284/9021/409/5618/100133941/5580/920/253260/3717/2043/1946/23529/55359/134/22876/4593/3645/3059/5007/11314/1196/7535/1856/2261/695/2…	358
BP	GO:0008654	phospholipid biosynthetic process	251/16611	258/18800	1.4116e-07	4.18227e-06	2.78795e-06	5154/2171/5359/5293/56994/8835/1040/55650/23167/8395/51604/3613/472/5321/10026/80157/8651/376497/84803/5155/80271/55326/150763/3635/54675/8776/1154/3074/25979/126969/8398/10351/9021/27124/2224/5295/55300/55224/8525/22876/142891/5007/80055/3707/336/79575/11145/2181/80235/5297/20/246/5277/10380/3612/3931/8526/146850/3357/8897/8821/51477/57605/23049/5467/3631/10555/259230/54965/8394/84174/1103/84962…	251
BP	GO:0043543	protein acylation	251/16611	258/18800	1.4116e-07	4.18227e-06	2.78795e-06	84885/7703/54799/57325/80314/26122/254887/284058/8986/6877/10933/10269/60/60560/406/27097/23411/84289/55167/23181/7994/51200/6688/55209/79844/9425/9862/8520/2932/56970/3054/6944/10524/4300/26038/57634/8473/23774/10865/10847/9767/57326/57673/23522/55689/3662/283576/2308/195814/84243/84148/8464/6872/80018/79683/79969/11091/11143/6659/117143/25921/253175/4967/93624/51126/9913/5595/57467/2033/55226/4…	251
BP	GO:0016054	organic acid catabolic process	236/16611	242/18800	1.44526e-07	4.26217e-06	2.84121e-06	6999/259307/122970/55268/33/51268/10449/3081/2184/51166/64900/80896/4846/2806/5106/57834/84129/32/8564/89874/2744/8659/443/27349/56603/4357/123688/4843/340665/3030/66002/56898/1268/4143/384/594/60496/11112/1376/8309/1962/5860/51380/89839/51540/1610/8942/160428/3242/5467/219970/23659/54363/1592/131669/1375/11057/5096/549/10478/883/54905/27165/11001/2731/26063/10007/7263/10005/5264/23576/208/283927…	236
BP	GO:0007249	I-kappaB kinase/NF-kappaB signaling	279/16611	288/18800	1.45531e-07	4.27203e-06	2.84779e-06	4057/3552/10346/92610/843/841/684/3956/54209/1936/6275/9641/6398/5971/972/1653/51246/114769/51311/10206/958/4795/356/23411/4919/3162/8904/4055/80216/25/79594/140885/11035/85363/6737/3315/11040/51284/64581/286827/3656/7132/117854/58509/602/284/57449/84433/4615/171392/6772/920/10475/9100/8737/79931/389/1236/114609/80833/3965/7128/5987/695/9830/5966/8767/8878/51135/3123/10758/81858/10783/9188/9475/6…	279
BP	GO:0051235	maintenance of location	319/16611	331/18800	1.48603e-07	4.34221e-06	2.89457e-06	3627/9113/4283/6373/11151/54209/930/1040/9641/805/5552/287/4481/3690/56704/7114/1234/7226/7529/55294/718/55636/356/79041/5777/6777/1627/23411/10523/6263/4188/6279/32/10956/1066/80024/25/2934/3074/8989/2185/55283/10945/25792/4794/7184/5031/9908/6672/23515/2829/10142/11015/920/5311/187/5167/11344/1236/57190/1535/817/11079/6262/5350/4052/6280/4923/338/7220/4067/2281/3685/11014/7442/6717/65018/4681/9…	319
BP	GO:0071900	regulation of protein serine/threonine kinase activity	357/16611	372/18800	1.5257e-07	4.43775e-06	2.95826e-06	4057/5570/5154/54619/5899/9113/8826/1857/84722/26191/805/22943/7026/6714/26524/81848/84152/5871/958/60/54757/6188/54900/10253/376497/904/6547/5155/5777/11221/23411/11235/959/7422/10636/25/7251/8312/2321/2180/2185/10252/6850/7023/8322/6091/650/100133941/5347/5580/171392/51422/57493/84062/253260/10221/5311/2043/9146/11211/388324/7984/9077/11314/7128/80279/1856/1026/645121/4067/124790/10961/1032/345…	357
BP	GO:0034976	response to endoplasmic reticulum stress	250/16611	257/18800	1.55797e-07	4.51102e-06	3.0071e-06	5924/115290/1051/55741/23645/127733/2213/10134/10206/11236/23411/837/1191/10956/55757/6048/1981/25/160418/7466/116496/10211/7060/489/84919/8398/8975/2932/26270/2923/8720/7184/5295/79094/79139/153657/4189/7327/5034/7353/26232/7009/5516/666/80279/4287/126433/57333/4121/118424/10961/285533/55139/168620/10399/246/1965/51035/3576/11153/4690/51360/80020/7494/5770/1047/91147/91445/5706/91319/240/378884/…	250
BP	GO:0001894	tissue homeostasis	264/16611	272/18800	1.60661e-07	4.60997e-06	3.07306e-06	4057/4938/10413/1281/5175/11151/6696/25937/29887/9607/9545/3690/4846/6714/57817/285331/60/947/12/4117/3908/3635/23746/729230/7287/7422/7018/8842/143689/3315/286204/1003/65267/58476/2185/6850/2623/284/1311/9076/26058/2296/9153/1200/216/482/4982/171392/4069/53832/31/4588/23154/51599/317719/7128/2103/653781/282809/57333/3848/5025/6833/1258/79705/115861/64116/7037/64072/567/2697/3915/3791/166379/7099…	264
BP	GO:0043547	positive regulation of GTPase activity	264/16611	272/18800	1.60661e-07	4.60997e-06	3.07306e-06	5924/51520/1857/9411/1969/5910/64411/8477/29/141/958/81565/23216/23526/9628/51429/6352/128272/10636/858/1399/55531/2185/2932/6494/6004/25780/201176/5999/27237/6347/6846/11211/9882/221002/7984/1236/8301/3655/6281/55803/6364/1856/2041/23102/55619/8412/3987/6792/6001/9649/10399/23603/10507/613/7248/253959/10979/55255/7474/10235/27352/153/84253/2302/6000/54361/5906/146923/64786/57568/79774/23179/2064…	264
BP	GO:0061136	regulation of proteasomal protein catabolic process	187/16611	190/18800	1.61486e-07	4.61285e-06	3.07498e-06	4983/57805/3077/54209/1263/23429/11011/10134/55294/64285/6613/1454/1191/819/160418/5701/8312/27074/5704/9604/8975/2932/51343/127544/143941/5582/5347/6599/10221/8473/4092/57095/56893/11337/11345/5887/4287/26259/5721/6872/10399/255488/65018/51035/55743/5720/150684/153769/7874/91445/5706/161582/120892/26263/91304/10869/1050/857/7415/90637/51322/11315/26471/29979/2332/7917/23376/2876/3303/5071/2629/5…	187
BP	GO:0043487	regulation of RNA stability	168/16611	170/18800	1.82249e-07	5.18271e-06	3.45485e-06	221662/9641/23034/56478/23185/57690/115572/3184/6556/7538/7432/4848/10949/8570/8241/677/57472/154197/10492/57060/54542/10140/51538/22894/7133/26058/4615/149041/5580/196513/11340/54890/114609/27161/23369/4292/28960/4869/11044/10758/27327/51010/9475/9924/2668/54555/9513/124245/166863/79675/1787/9261/167153/255967/1618/29883/7431/90806/64282/2332/678/1797/131405/9698/57054/1994/22849/5436/10642/5509…	168
BP	GO:0060041	retina development in camera-type eye	148/16611	149/18800	1.87934e-07	5.32062e-06	3.54678e-06	5176/93/30812/57381/348980/3913/7101/57010/55636/1545/10319/91355/5158/7287/1826/8842/286204/6096/22882/3208/25932/8322/6247/5961/7042/84062/130557/6597/1641/58158/57835/84465/1735/50939/7068/5145/5950/221322/585/2823/8829/43/167153/2782/491/6010/30813/51761/54567/57030/23363/5146/1746/4693/60436/4041/4760/6662/1745/2055/94137/3091/6497/56853/204851/256297/4669/85015/2779/5663/5458/54806/22803/59…	148
BP	GO:0050870	positive regulation of T cell activation	218/16611	223/18800	1.91504e-07	5.3977e-06	3.59817e-06	259307/3552/3566/10288/8740/916/79679/3956/921/11151/923/3127/941/3122/26191/6504/55423/972/8764/3600/6714/64332/861/3118/5896/6188/8651/3718/5777/6777/11221/64926/1960/10326/959/729230/6352/3575/140885/3133/3485/5590/3119/23308/3115/864/6850/9308/1604/10859/10385/51043/22890/7704/84433/100133941/3108/3142/920/970/6347/3717/1948/3146/6541/1803/1236/7048/3965/9840/1947/64115/80380/114548/4192/7535…	218
BP	GO:0032984	protein-containing complex disassembly	233/16611	239/18800	1.95586e-07	5.48848e-06	3.65868e-06	440738/80183/84557/23075/10023/6683/79443/25876/2039/157922/10269/822/8444/2934/81671/3920/7251/643246/55337/2107/2932/9140/146206/29082/4778/6455/6599/11198/253725/8673/55201/830/832/56893/6597/11344/55604/2059/4131/63908/55239/9948/6602/1073/10013/6059/196528/6840/23332/3796/57662/829/9829/4609/23274/23557/115677/56203/57724/4905/154/79643/91782/65082/10677/7415/6749/442721/57192/11213/3831/299…	233
BP	GO:0045862	positive regulation of proteolysis	354/16611	369/18800	1.97154e-07	5.5082e-06	3.67183e-06	4627/10395/843/841/2152/54209/1263/2822/29763/842/6714/1075/10134/2903/55294/6188/356/6613/11236/1454/23411/637/6279/55851/1191/51429/79594/2934/149628/160418/5701/8312/2192/489/9733/64581/2185/6850/5704/9604/8975/2932/51343/7023/6900/5023/127544/7133/2896/6091/5347/5118/3717/3249/10221/2043/27429/6774/3146/8473/4092/11337/2335/55081/3818/152503/3965/8301/64115/6281/666/9026/114548/6280/4287/3491…	354
BP	GO:0021953	central nervous system neuron differentiation	167/16611	169/18800	2.04167e-07	5.66225e-06	3.77452e-06	23440/4983/7471/5727/4781/7101/81565/57282/170825/79809/170302/3226/6900/143941/26058/55906/26468/51199/9353/4825/85442/26038/8320/2043/3251/57147/10716/6324/4852/10371/10215/2047/84871/8543/161357/2263/6659/567/4967/3624/429/151449/8829/1436/120237/63925/4137/23314/401/8925/2016/2736/167826/54567/3320/8861/4133/1630/55079/85358/1746/9201/3670/4821/374946/6656/55558/3400/8929/1996/91584/1745/2055…	167
BP	GO:0007281	germ cell development	289/16611	299/18800	2.04446e-07	5.66225e-06	3.77452e-06	54970/10919/7130/7490/2069/9985/6714/472/268/84229/83853/402381/63951/26108/11022/3074/2189/116369/2185/9425/11144/286464/89765/7704/4090/4880/5806/146849/9576/26038/344018/57095/152015/9519/317719/9403/84223/4192/639/79582/283629/25981/4292/255101/90/9148/84071/8549/283417/6691/79989/8382/81492/5764/1761/132141/64395/57820/375337/668/168391/6196/6305/585/5819/54361/79925/7784/994/26256/54763/173…	289
BP	GO:0006631	fatty acid metabolic process	378/16611	395/18800	2.07942e-07	5.73415e-06	3.82245e-06	122970/5322/2171/55268/33/22949/10449/54898/5165/972/241/7306/64900/5321/27163/1571/5730/718/1545/376497/127/2948/23411/8560/64834/150763/5106/57834/84129/32/1066/5742/11343/80221/3990/2687/2180/7132/27349/26027/10965/283985/641372/51422/134526/31/11313/8013/3030/9536/66002/284486/56898/1268/2181/1573/1376/8309/1962/1549/387521/246/56624/641371/427/23205/54995/53632/160428/7494/11000/9524/240/546…	378
BP	GO:1901214	regulation of neuron death	302/16611	313/18800	2.10741e-07	5.7863e-06	3.85722e-06	5176/7471/841/2730/1051/11151/54209/1728/22943/27324/57103/2213/842/84678/472/7226/55294/947/4099/356/23411/3162/712/23098/3672/2539/1191/6352/8564/1981/25/6648/131450/7466/2185/1522/2932/163/135112/29082/3689/10457/7133/2896/284/409/5582/7042/4841/6347/84062/3717/1948/27429/219699/2898/23529/3684/134/8013/4852/8301/23621/666/4192/155061/2047/627/4776/3458/100528062/836/1270/23657/10399/8326/8846…	302
BP	GO:0046395	carboxylic acid catabolic process	232/16611	238/18800	2.16294e-07	5.91328e-06	3.94186e-06	6999/259307/122970/55268/33/51268/10449/3081/2184/51166/64900/80896/4846/2806/5106/57834/84129/32/8564/89874/2744/8659/443/27349/56603/123688/4843/340665/3030/66002/56898/1268/4143/384/594/60496/11112/1376/8309/1962/5860/51380/89839/1610/8942/160428/3242/5467/219970/23659/54363/1592/131669/1375/11057/5096/549/10478/883/54905/27165/11001/2731/26063/10007/10005/5264/23576/208/283927/1738/58510/5757…	232
BP	GO:0002244	hematopoietic progenitor cell differentiation	123/16611	123/18800	2.31376e-07	6.29857e-06	4.1987e-06	3213/11051/3214/1938/55008/10443/6547/5777/55326/55526/10538/26108/5977/25/6688/401551/2321/23495/9119/22890/2296/4300/9841/6659/4291/3624/3791/54443/6939/54517/1436/8692/9739/11149/115761/23335/103/167153/83700/1021/5978/122618/84138/55512/23376/96459/5610/596/147808/4222/8546/23212/1636/51119/168002/4780/3313/2322/23094/51441/10468/7157/282991/3815/5663/51205/11277/157570/4254/2009/5134/6469/20…	123
BP	GO:0050953	sensory perception of light stimulus	216/16611	221/18800	2.35411e-07	6.35409e-06	4.23571e-06	129880/3257/1277/2202/7288/6425/3913/285331/346007/7101/57010/3000/1421/10319/4935/57282/778/1411/5158/23746/7287/4060/7466/11281/314/286204/9249/5306/6096/6247/6004/5961/84839/7546/130557/57369/2780/1261/155051/1429/1258/24139/50939/64072/1301/197021/6103/5145/5950/3617/65217/5132/585/4308/53405/582/28987/4990/1415/79738/7401/10265/6010/30813/7045/51761/54567/80207/1280/285440/5146/2978/3801/547…	216
BP	GO:0071241	cellular response to inorganic substance	216/16611	221/18800	2.35411e-07	6.35409e-06	4.23571e-06	5176/4499/84557/8826/3077/1728/2822/57103/241/2039/7226/3184/4205/4884/4318/10105/2354/3162/8904/6263/4489/358/8437/7018/4496/26149/91683/29957/2203/4493/3736/3208/25932/9076/144402/4314/5311/10058/1800/6857/817/23621/84329/22871/3707/4776/5025/2308/246/1965/567/7474/56160/151835/10235/5595/127833/8820/1027/811/120892/706/100271927/51760/3725/6261/1585/3727/79085/1050/90019/9066/148281/57192/2332…	216
BP	GO:0001890	placenta development	146/16611	147/18800	2.38122e-07	6.40016e-06	4.26642e-06	150921/841/1051/6696/8061/7262/7026/3696/9820/5155/4188/677/9021/682/29072/8320/5311/400629/55224/8728/639/3491/1508/10653/26259/3481/7421/2263/8846/5764/7855/10761/5467/84870/2707/100506013/1027/55870/653/7477/5604/23462/1050/5340/100/6692/57448/23641/4216/133/4693/10935/59343/6670/2709/5310/329/655/2693/3091/2885/6789/56977/4221/64783/4311/1432/79879/4435/2034/5594/22846/8648/10733/23493/79893/…	146
BP	GO:0006790	sulfur compound metabolic process	326/16611	339/18800	2.50765e-07	6.71165e-06	4.47407e-06	6999/122970/9953/100131187/58472/26873/55711/2730/51268/1192/54898/23463/5165/64377/51166/81689/9022/10861/93010/4258/9391/337876/6482/2948/6777/60386/64579/64834/64210/633/23181/2539/32/6648/4166/79717/80221/2687/2180/9435/284/4357/26027/10965/27247/79094/5162/10678/641372/134526/56548/1800/31/5167/8801/284486/4143/23474/25874/2181/6506/23657/51380/9061/641371/10380/83539/1836/23205/4507/54995/6…	326
BP	GO:0002700	regulation of production of molecular mediator of immune response	165/16611	167/18800	2.56173e-07	6.8277e-06	4.55142e-06	51111/3566/6778/10225/684/3077/10417/115004/26191/6504/972/8764/2213/1653/91543/958/54537/8482/3718/23411/3162/8741/959/729230/3133/5590/64581/117854/1604/10859/7133/284/7468/7042/8809/23529/4092/4189/10865/3598/8013/7009/114548/388325/79915/695/51744/336/4292/51010/7293/942/9188/7037/25818/7855/144811/567/7474/7494/7099/5950/54795/149840/7805/3098/116449/11005/121260/11213/3805/8915/3605/1178/11…	165
BP	GO:0002703	regulation of leukocyte mediated immunity	230/16611	236/18800	2.64435e-07	7.01853e-06	4.67864e-06	51111/259307/3566/6778/10225/684/8302/3077/54209/2242/3122/6504/640/2213/1653/114836/5724/100507436/196/91543/958/718/2268/54537/7454/3823/3718/5777/6777/3140/5880/3162/8741/729230/3575/11035/3133/6688/3916/5590/3383/5272/64581/1776/6850/1604/10859/3689/2623/7133/22890/409/7468/8673/30817/8809/3146/23529/4092/3684/10865/3598/4843/3965/11314/117157/114548/388325/79915/695/2294/3821/4292/4067/136/3…	230
BP	GO:0032956	regulation of actin cytoskeleton organization	338/16611	352/18800	2.65691e-07	7.02262e-06	4.68136e-06	3552/5154/10395/23075/9113/8826/684/51225/11151/7408/2242/11346/6548/54942/4233/6385/7114/2039/8477/7226/93663/23607/7454/90668/822/5880/1627/51429/128272/25/2934/29109/23221/6869/54961/5734/84952/2185/146206/9788/5345/5295/57175/55971/23433/9353/5999/5580/253725/9873/91663/253260/830/11211/397/832/1946/79822/51466/7984/11344/389/1236/3397/55604/3059/9723/6281/2059/29984/9026/4192/27067/343578/59…	338
BP	GO:0018209	peptidyl-serine modification	325/16611	338/18800	2.73701e-07	7.20445e-06	4.80257e-06	9113/5165/9641/11011/22943/2591/8986/6714/8693/2039/26524/472/624/10253/114805/5155/1454/6195/11235/633/7422/8444/1981/5583/815/10268/6197/8312/5590/2621/6850/117854/2932/27330/284/8658/409/27124/5582/23515/5347/10142/5580/253260/5603/8737/4092/22876/3059/7048/817/1456/11184/2872/283629/627/8412/3458/8767/8445/6872/10399/10783/9475/65018/7037/8091/10013/2590/4690/79070/7474/282974/375449/11137/61…	325
BP	GO:0009416	response to light stimulus	299/16611	310/18800	2.76565e-07	7.23076e-06	4.82011e-06	7076/57805/54617/1040/842/114769/84152/5896/285331/2903/346007/57010/5153/3000/4318/57282/778/23411/79823/5158/8553/23746/358/7287/10636/150678/840/5936/7486/83759/3198/602/143941/22890/6247/5295/5961/2793/4314/5580/1621/5603/23596/5481/4852/847/2780/90313/57646/1161/1026/4776/1032/1643/4869/836/10715/6833/6506/3269/1258/23657/6872/5500/1965/5429/58473/4313/56160/5132/2033/4308/51435/4609/8692/79…	299
BP	GO:0006310	DNA recombination	312/16611	324/18800	2.7763e-07	7.23076e-06	4.82011e-06	51111/79728/6778/23075/84268/54799/3005/158880/54617/115004/80314/26122/9985/55693/10933/472/5896/54891/958/60/54537/164045/7454/23126/27343/22944/8741/64210/959/10538/3575/5885/7486/6932/11144/6832/6944/7468/10524/4841/29072/57634/3146/400629/23529/7011/5980/56893/6929/23347/11077/79915/7014/4292/1325/51010/10111/7037/57820/196528/23304/6119/149840/79913/23028/3980/7528/11105/3149/6421/7155/1973…	312
BP	GO:0007565	female pregnancy	182/16611	185/18800	2.79241e-07	7.23076e-06	4.82011e-06	7076/150921/6696/8061/2013/3488/7026/79816/4318/2354/6777/5021/7216/7056/259/7422/3485/81671/3675/2192/7005/8398/3678/5618/682/23780/64750/397/361/3490/7048/3965/3291/5680/1268/27161/639/1508/6833/7004/7421/5764/151/4313/6866/2697/5467/100506013/54361/53405/811/55870/5125/796/84868/10991/6573/5671/1307/2488/412/6513/54407/23641/133/4693/285/116/1828/596/29974/10661/5675/824/10935/130399/56848/667…	182
BP	GO:0061138	morphogenesis of a branching epithelium	182/16611	185/18800	2.79241e-07	7.23076e-06	4.82011e-06	5154/10413/7471/255743/5727/7490/1969/30812/4233/6714/9231/10253/3217/2719/91355/23129/7422/25/10252/1522/25932/9021/650/9353/64399/5311/5087/7048/3237/9723/10371/340419/4192/2294/4776/90/10653/7075/374/7421/2263/10818/7855/2668/4323/7474/3791/2252/55727/151449/84870/2255/8829/54361/4609/59277/3202/2736/10481/4089/54567/3611/6926/6692/80004/26585/133/1435/11331/596/4041/51804/1950/1499/7482/4824/…	182
BP	GO:0007163	establishment or maintenance of cell polarity	214/16611	219/18800	2.89265e-07	7.45999e-06	4.97292e-06	4983/4478/4627/1495/29780/10486/6548/6425/9585/9265/60/9231/10253/81565/3993/55333/5880/55612/917/358/2934/23221/1399/79648/286204/1003/5590/10096/2185/143098/10252/2932/146206/25932/56603/9124/5347/51421/253260/9368/9053/389/1236/6693/29984/4926/4131/54908/9948/2294/2047/10653/2319/126353/3071/10758/10399/57710/388/9475/399/5879/2697/7474/23332/3834/6939/57662/2302/2255/51248/64083/9024/9826/747…	214
BP	GO:0097193	intrinsic apoptotic signaling pathway	285/16611	295/18800	2.95672e-07	7.59447e-06	5.06256e-06	57805/5329/1051/54209/1969/23645/9641/2537/972/6477/842/51246/79073/6714/10134/472/624/55294/6188/1545/4318/10105/23411/637/3162/837/1540/11235/6279/1191/25/6648/11035/597/7466/3315/489/7132/602/84944/7133/9774/5295/100133941/79094/5580/4841/53832/3717/9368/27429/51616/3070/5034/7009/666/6280/57646/79915/1026/7159/4292/4776/219790/10961/1032/836/8445/29949/10399/8382/65018/8876/2023/4690/7494/577…	285
BP	GO:1990778	protein localization to cell periphery	324/16611	337/18800	2.987e-07	7.64144e-06	5.09388e-06	6769/3958/7162/83871/51225/5727/54209/1969/256764/2013/10791/9545/23759/287/254887/64114/23167/131578/8631/2903/60/26258/2633/4884/9211/63971/5583/10268/10211/3675/65267/5590/2621/30844/7132/30846/682/5295/23433/5347/376267/27237/8673/84062/91663/9368/196383/9053/54997/8301/11079/6281/4926/29993/23136/2042/286753/3458/283576/8878/2319/126353/23114/2181/10399/20/1173/9475/5911/6809/4323/57120/2592…	324
BP	GO:0015931	nucleobase-containing compound transport	213/16611	218/18800	3.20599e-07	8.16887e-06	5.44546e-06	10643/54830/3178/10644/340146/7538/9961/130132/255022/60386/4600/8570/8106/677/10211/84271/1069/29957/4641/114789/10073/8658/9153/9908/23144/7355/26019/29072/8737/23299/9154/134/55186/54890/7048/9818/23237/6428/63910/5903/387990/4869/54847/57097/144983/9631/57510/3181/3837/7248/26993/291/84324/23049/9284/55746/113829/7919/57724/55421/65110/3800/10762/79085/3267/10478/9804/6573/2030/26097/9197/284…	213
BP	GO:0045055	regulated exocytosis	228/16611	234/18800	3.23149e-07	8.20104e-06	5.46691e-06	4627/3566/5293/11151/2242/640/9545/2213/5873/5724/2039/5730/2268/26258/5880/3162/729230/6688/3916/8676/91683/55503/6850/2932/5023/3689/2623/284021/5582/376267/8673/30817/10972/84062/3684/6857/3598/8013/3965/4818/11314/23621/9145/9498/1268/63908/22871/695/2294/4067/136/3071/55207/7462/6809/613/6853/1142/201294/10675/9783/127833/84106/306/5906/9144/7784/6616/23557/8913/6855/120892/25837/9381/51760/…	228
BP	GO:0032271	regulation of protein polymerization	197/16611	201/18800	3.30407e-07	8.35195e-06	5.56751e-06	9113/84722/11151/7408/2242/54942/4233/7114/2039/157922/93663/6188/822/1627/4733/51429/25/2934/1003/54961/2185/221074/146206/27124/51199/79998/55971/9353/10142/5580/253725/9873/91663/253260/830/832/79822/51466/11344/1236/55604/3059/2059/9026/4926/4131/343578/3071/6249/163782/24139/65018/246/64857/5879/4690/54434/6840/23332/57662/829/402/1859/585/4868/1027/9168/4204/56203/286527/148170/4137/10382/3…	197
BP	GO:0006936	muscle contraction	335/16611	349/18800	3.4387e-07	8.6579e-06	5.77146e-06	6769/4608/255743/779/1829/23630/805/7170/5910/287/6548/1134/5724/1674/2593/23704/624/4638/6547/79041/1837/5021/8106/26287/2934/5733/6869/4622/6865/8398/10203/5023/3736/1311/2702/4090/26509/10142/10316/4092/134/6324/817/476/6262/5350/10008/384/80763/2281/136/7171/3781/22953/5025/29895/7442/4625/9732/6717/7852/9631/9475/6641/151/23676/55959/2668/2023/497189/127294/2697/3357/7140/6327/10324/152/1145…	335
BP	GO:0090087	regulation of peptide transport	180/16611	183/18800	3.47419e-07	8.71282e-06	5.80807e-06	3077/9607/972/640/2822/760/7226/55636/406/3170/7447/91355/8111/6279/4826/5106/6352/80024/388581/2645/338557/8398/415116/4825/3717/1946/134/4843/6755/5007/1268/57818/2281/3458/25874/9463/6833/3123/2696/6717/6659/5950/54795/240/2243/5467/3172/6934/51714/6616/57555/23409/90007/2852/9024/286676/26154/2550/9066/2850/5978/7200/91608/51768/65985/5071/116/2922/3670/4041/5715/5530/130399/5213/3382/4760/36…	180
BP	GO:0007601	visual perception	212/16611	217/18800	3.5529e-07	8.87529e-06	5.91637e-06	129880/3257/1277/2202/7288/6425/3913/285331/346007/7101/57010/3000/1421/10319/4935/57282/778/1411/5158/23746/7287/4060/7466/11281/314/286204/9249/5306/6096/6247/6004/5961/84839/7546/130557/57369/2780/1261/155051/1429/1258/24139/50939/64072/1301/197021/6103/5145/5950/3617/5132/585/4308/53405/582/28987/4990/1415/79738/7401/10265/6010/30813/7045/51761/54567/80207/1280/285440/5146/2978/3801/54714/141…	212
BP	GO:0050767	regulation of neurogenesis	346/16611	361/18800	3.88607e-07	9.66964e-06	6.4459e-06	23440/3213/5176/10413/63950/29882/6696/54209/30812/1495/9820/7101/389549/55636/406/81565/4099/8482/140578/51393/11221/1627/23129/170825/8553/7422/1826/10636/51265/5583/23316/7224/7533/5324/7424/84376/4076/443/55502/7133/6091/26508/51199/650/9353/4825/2043/1946/23529/1954/2335/11344/6049/3397/9856/84504/9723/10371/6405/10215/4131/4192/27067/627/4067/4776/5802/3458/100528062/283659/26259/6792/7143/…	346
BP	GO:0098656	anion transmembrane transport	240/16611	247/18800	4.15345e-07	1.02947e-05	6.8626e-06	8542/340146/10723/10861/6548/5724/376497/57282/338440/162515/60386/89874/116369/84561/23539/9747/50636/94081/2564/5999/7355/8737/6541/387700/8884/133418/222642/285966/9498/6508/23428/4923/57835/123096/25874/6506/2554/84889/23657/83959/64116/118980/7416/6557/57120/1836/57468/2697/291/6528/10166/253512/4609/6540/2566/6550/9990/2557/123041/2565/11230/10991/5250/121260/10478/57030/6573/159963/3688/28…	240
BP	GO:0045137	development of primary sexual characteristics	225/16611	231/18800	4.36186e-07	1.07282e-05	7.15154e-06	3552/5154/7130/1051/7490/174/2069/30812/1495/9985/7026/4846/101927581/6714/472/268/56729/6586/1545/9510/6777/23411/63951/23598/7422/1399/2189/10184/11144/2623/8322/409/2296/2661/7042/9353/5806/7022/400629/2627/317719/10371/5926/666/9825/10046/836/8751/1761/4323/23205/4313/2697/7474/3624/3791/89766/668/638/8820/59338/11086/54361/4609/7784/8433/7425/50846/10265/4089/2/344758/2488/598/26471/128637/8…	225
BP	GO:0050803	regulation of synapse structure or activity	210/16611	215/18800	4.36201e-07	1.07282e-05	7.15154e-06	10288/7162/29882/51225/54209/22943/5552/83992/2213/9231/257194/4884/1627/5021/1981/25/23316/27286/79953/55209/4076/78999/3587/139065/84062/2043/1946/22859/4593/7534/6405/22871/27067/23237/347902/2047/627/4776/9419/100528062/6792/9148/23657/10507/7474/57633/7097/57497/10611/8292/79012/2823/158038/6585/64284/57555/120892/23768/382/577/1942/3556/7415/57030/10458/56850/378/203068/85358/9912/80725/547…	210
BP	GO:0009410	response to xenobiotic stimulus	392/16611	411/18800	4.67828e-07	1.14618e-05	7.64056e-06	5154/4837/10451/10919/445/2730/9/5378/1277/5727/1728/8061/8856/2822/57103/218/6714/969/2987/268/196/1571/2903/1545/2948/2354/3162/5021/32/4015/25/6648/3485/1399/314/3675/2621/8989/2180/7424/2185/2203/57552/56603/200315/7042/4880/4825/4982/6772/316/1800/4843/1535/7048/2627/847/3030/66002/3291/476/90313/4131/4192/336/2329/4067/284996/4773/8412/836/1429/10715/11044/3071/120227/6833/6506/1573/10758/7…	392
BP	GO:0002791	regulation of peptide secretion	177/16611	180/18800	4.81803e-07	1.17491e-05	7.83212e-06	3077/9607/972/640/2822/7226/55636/406/3170/7447/91355/8111/6279/4826/5106/6352/80024/388581/2645/338557/8398/415116/4825/3717/1946/134/4843/6755/5007/1268/57818/2281/3458/25874/9463/6833/3123/2696/6717/6659/5950/54795/240/2243/5467/3172/6934/51714/6616/57555/23409/90007/2852/9024/286676/26154/2550/9066/2850/5978/7200/91608/51768/65985/5071/116/2922/3670/4041/5715/5530/130399/5213/3382/4760/3625/7…	177
BP	GO:0009952	anterior/posterior pattern specification	209/16611	214/18800	4.83246e-07	1.17491e-05	7.83212e-06	4223/3213/7471/79728/3214/7703/93/3215/7490/3199/22943/5015/7026/84678/2114/472/389549/3170/3217/2719/91355/3212/3227/23242/8553/11022/1399/286204/2926/3226/55502/2296/5013/7704/26508/650/4300/5087/3203/5090/3224/340665/80055/2294/23237/134701/3204/9968/10818/657/7855/497189/7474/3200/3211/6939/79365/2033/3201/7528/2648/5125/3202/4087/23462/8854/2019/4089/8861/55897/2018/55079/6926/3216/84667/234…	209
BP	GO:0071675	regulation of mononuclear cell migration	116/16611	116/18800	5.53612e-07	1.33187e-05	8.87841e-06	3627/5919/4478/3958/8740/6504/5054/8764/729230/6352/80024/11035/131450/1399/6688/2358/2621/2185/257144/1230/9353/56833/6347/6846/3146/1236/6693/3965/4192/6364/4067/4681/7474/100528032/5595/1436/811/57402/1240/23143/653/79647/9943/148823/6366/22914/26585/10488/81704/387/6351/1435/177/8174/196527/6354/9750/6387/9466/284114/8772/351/284340/10850/7941/5594/6348/65125/27347/58494/102/375056/100532736/…	116
BP	GO:2001233	regulation of apoptotic signaling pathway	354/16611	370/18800	5.53972e-07	1.33187e-05	8.87841e-06	3552/10413/3958/7703/2730/57805/51330/10449/5329/54209/1495/50486/5054/2537/972/6477/81618/64114/85450/4846/6714/1075/10134/624/55294/26574/6188/4318/10105/23411/84289/637/3162/1540/162989/6279/4055/1191/6648/11035/7466/3315/3383/2139/2932/2623/2923/409/9774/6672/5580/4841/1621/53832/3717/9368/27429/8737/219699/51616/3070/388324/5196/5034/3655/6478/7009/7128/666/6280/79915/56917/627/4150/4776/368…	354
BP	GO:0046486	glycerolipid metabolic process	378/16611	396/18800	5.55526e-07	1.33187e-05	8.87841e-06	8228/5154/5322/2171/5359/5320/151056/5293/56994/8835/1040/2822/55650/64900/23167/8395/10908/51604/3613/472/5321/27163/10026/80157/1571/55294/718/8651/376497/145447/84803/54979/5155/80168/80271/55326/23411/4547/150763/3635/54675/8776/5106/2819/114884/11343/1154/25979/3990/23399/2180/126969/133121/150379/8398/26279/9021/27124/5295/284161/55300/55224/11313/8525/22876/847/3030/392636/284486/80055/370…	378
BP	GO:0000209	protein polyubiquitination	237/16611	244/18800	5.56166e-07	1.33187e-05	8.87841e-06	10346/29882/9111/26191/57542/23759/134111/3429/23623/54765/84282/84875/7174/6048/79594/85363/6737/8312/81847/257218/164781/9604/117854/54542/51343/494470/127544/143941/8658/149041/92369/7267/7681/64750/10475/81844/7327/11337/6049/26118/118611/148203/7128/54926/1161/5987/118424/9830/1643/51366/220441/10758/6872/81858/255488/7185/10013/90025/81545/55743/91445/378884/8452/54708/64400/26263/151636/25…	237
BP	GO:0051480	regulation of cytosolic calcium ion concentration	341/16611	356/18800	5.91616e-07	1.41146e-05	9.40894e-06	3627/80045/779/23075/6288/4283/6373/11151/930/10803/56477/805/287/56704/55584/1234/10134/8477/7226/624/2903/55636/2357/2827/356/51393/3718/6547/79041/5777/778/10523/6263/5021/1903/729230/6863/80024/25/1043/858/79608/10268/7224/185/5733/6869/2358/55503/8989/5734/2185/55283/338557/8398/1604/2906/5023/887/2623/1230/2830/5031/84636/2785/100133941/10663/2829/3717/10161/5311/3146/187/1233/9034/134/1236…	341
BP	GO:0051495	positive regulation of cytoskeleton organization	191/16611	195/18800	6.22038e-07	1.4785e-05	9.85586e-06	23075/84722/7408/2242/11346/4233/6683/6385/8477/6188/7454/4733/51429/25/2934/29109/6869/2185/79768/146206/9788/5345/51199/79998/55971/10142/253725/9873/253260/51466/7984/389/1236/3397/55604/3059/6281/4926/4131/5987/9948/2041/3071/6249/1073/225689/9475/246/7248/10979/5879/4690/23332/1902/4653/402/8829/4868/54361/1027/4204/148170/4137/85459/382/89848/80115/6366/91807/442721/10458/55835/54551/3265/1…	191
BP	GO:0006261	DNA-templated DNA replication	157/16611	159/18800	6.33043e-07	1.49906e-05	9.99293e-06	84268/54617/56652/10269/11177/7486/25792/5983/5980/5422/5000/5428/79915/7014/1325/9188/92667/11143/79892/91607/5981/54921/50484/56897/9134/3980/9416/197342/54465/378708/389643/92797/10926/5426/254394/23595/84296/9401/57418/54107/51659/59343/6733/51507/1025/4175/8317/604/5813/3978/30968/90381/441161/2021/57804/51053/4172/10189/5888/222229/348654/6742/4174/990/5985/353497/29935/64710/3159/8318/545/…	157
BP	GO:0007159	leukocyte cell-cell adhesion	364/16611	381/18800	6.56135e-07	1.54799e-05	1.03191e-05	259307/3552/84524/4478/3566/3683/10288/445/3958/8740/916/5175/79679/3956/3077/1051/921/11151/923/3127/941/3122/26191/56477/6504/55423/3659/972/8764/3600/2213/5724/6714/6385/64332/861/3118/5896/8631/84695/9231/6188/54900/8651/3718/5777/6777/5074/5880/10875/11221/83706/64926/1960/10326/868/6279/959/729230/6352/3575/1493/140885/3133/3485/1845/5590/3119/23308/3383/3115/864/6850/54542/9308/1604/26279/…	364
BP	GO:0050954	sensory perception of mechanical stimulus	174/16611	177/18800	6.67614e-07	1.56349e-05	1.04224e-05	150677/1277/55584/51473/7007/55636/10253/64699/80204/4919/93035/7466/3074/5077/8312/339768/8989/3198/3736/8322/55084/3249/9368/2917/349149/53942/23621/80055/54532/9948/1032/79955/836/22953/5025/7442/5269/7852/24139/9311/64072/7068/1301/26517/501/153562/65217/1027/53405/645104/9381/7401/51168/491/525/56751/23349/83862/1280/3753/2876/4640/89797/8195/6907/4647/4648/25861/8556/4646/9750/6387/643226/4…	174
BP	GO:0090276	regulation of peptide hormone secretion	174/16611	177/18800	6.67614e-07	1.56349e-05	1.04224e-05	3077/9607/640/2822/7226/55636/406/3170/7447/91355/8111/4826/5106/6352/80024/388581/2645/338557/8398/415116/4825/3717/1946/4843/6755/5007/1268/57818/2281/3458/25874/9463/6833/3123/2696/6717/6659/5950/54795/240/2243/5467/3172/6934/51714/6616/57555/23409/90007/2852/9024/286676/26154/2550/9066/2850/5978/7200/91608/51768/65985/5071/116/2922/3670/4041/5715/5530/130399/5213/3382/4760/3625/7849/94121/957…	174
BP	GO:0044403	biological process involved in symbiotic interaction	276/16611	286/18800	6.73492e-07	1.57148e-05	1.04757e-05	4057/10346/23601/5359/54210/8542/3956/10410/1969/941/6504/972/8764/3690/6714/3429/1234/131578/904/8547/55065/2519/6352/4684/2934/858/85363/185/7251/6737/3916/2621/3383/286827/117854/1604/7023/3678/29082/9076/10581/682/4615/5806/8673/920/10475/3717/1948/3249/2335/5196/6597/5034/91392/3695/3965/5481/4261/1514/3482/5987/2838/1508/2219/3685/10533/9830/3123/55207/7293/820/7852/942/7037/8091/3576/25827…	276
BP	GO:0031346	positive regulation of cell projection organization	327/16611	341/18800	6.80506e-07	1.58205e-05	1.05461e-05	5176/7471/1857/29882/2242/6714/9820/257194/6239/81565/8482/140578/51393/57498/23242/5880/1627/23129/4919/7422/1826/51265/25/23316/7224/3675/10096/2185/4076/2932/146206/2896/8322/6091/5295/57175/51199/23433/9353/482/54664/2043/9662/1946/1954/2335/11344/1236/55604/6324/3655/2059/1268/6280/4131/4192/9139/29993/22871/27067/1856/27/627/4067/2281/2042/150696/8507/100528062/26259/6792/9148/49856/1270/10…	327
BP	GO:0031334	positive regulation of protein-containing complex assembly	190/16611	194/18800	6.90964e-07	1.60052e-05	1.06693e-05	4478/115362/3958/84722/7408/2242/4233/6714/472/8631/6188/4733/55612/637/1191/51429/7422/1981/1003/23379/64581/2185/143098/6850/2932/146206/51199/79998/4615/55971/10142/4314/253725/9873/253260/7453/50632/51466/7984/51100/389/1236/55604/114609/9026/4926/4131/3458/3071/6249/55719/8739/9780/10399/79969/65018/246/7037/10979/5879/4690/23332/7099/638/5706/402/8115/4868/1027/4204/148170/4137/51185/382/84…	190
BP	GO:0043488	regulation of mRNA stability	156/16611	158/18800	7.08589e-07	1.6354e-05	1.09018e-05	221662/9641/23034/56478/23185/57690/115572/3184/6556/7538/7432/4848/10949/8570/8241/677/57472/154197/10492/57060/54542/10140/22894/26058/4615/149041/5580/196513/11340/54890/114609/27161/23369/4292/28960/4869/11044/10758/27327/51010/9475/9924/2668/9513/166863/79675/9261/255967/1618/29883/7431/90806/64282/2332/678/131405/9698/57054/1994/22849/5436/10642/55095/129563/8087/60493/1996/1617/201626/3393…	156
BP	GO:0008406	gonad development	220/16611	226/18800	7.17467e-07	1.64992e-05	1.09985e-05	3552/5154/7130/1051/7490/174/2069/30812/1495/9985/7026/4846/101927581/6714/472/268/56729/6586/1545/9510/6777/23411/63951/23598/7422/1399/2189/11144/2623/8322/409/2296/2661/7042/9353/5806/7022/400629/2627/317719/10371/5926/666/9825/10046/836/8751/1761/4323/23205/4313/2697/7474/3624/3791/89766/668/638/8820/59338/11086/54361/4609/7784/8433/7425/50846/10265/4089/2/344758/2488/598/26471/128637/8894/31…	220
BP	GO:0017038	protein import	205/16611	210/18800	7.27138e-07	1.66614e-05	1.11067e-05	54830/84268/23534/56478/55612/868/1191/29969/3920/51555/3308/6850/602/10073/284/5514/5295/5580/3717/3841/6774/7984/3059/84134/9818/1026/3458/51366/5903/387990/8878/10758/92609/56993/9631/3837/9221/55696/100652748/9868/55746/8692/137735/120892/55374/10762/3320/51025/9804/11142/23511/1994/3329/11331/79711/5569/79902/5530/402569/5192/57506/11261/4928/8021/4321/727851/3838/5193/728489/285877/5371/545…	205
BP	GO:0031056	regulation of histone modification	173/16611	176/18800	7.44153e-07	1.69902e-05	1.13258e-05	4837/10919/57325/94104/284058/55693/8986/472/10269/23411/4302/54904/7422/55904/6688/122953/55209/7469/9733/51043/3054/8473/187/10865/817/80312/55689/51366/195814/3481/84148/55100/65018/11091/340602/11143/26993/93624/23168/5595/23028/4204/1786/120892/63925/9682/2648/7936/4089/6871/26097/11315/2332/64324/78990/9252/6839/6418/4582/55818/80764/3670/6830/402569/56848/1499/1025/55183/604/10270/55124/17…	173
BP	GO:0034754	cellular hormone metabolic process	136/16611	137/18800	7.75276e-07	1.76375e-05	1.17574e-05	8228/259307/151056/6696/174/54884/5947/1889/7276/27122/1545/127/6777/9249/339761/59342/220/56603/216/650/8630/1583/340665/195814/5950/59338/1592/54361/10196/51635/706/7367/653/1585/8854/79154/130/1562/2488/54905/53630/5978/10858/8912/6715/3293/133/3991/8694/54600/1543/7923/3972/57665/7364/1601/51170/54577/3292/3283/1544/3028/57016/6783/158835/1577/3294/51478/131/54659/1584/64577/10720/54576/8644/…	136
BP	GO:0050807	regulation of synapse organization	204/16611	209/18800	8.05114e-07	1.82512e-05	1.21664e-05	10288/7162/29882/51225/54209/22943/5552/83992/2213/9231/257194/4884/1627/5021/1981/25/23316/27286/79953/55209/4076/78999/3587/139065/84062/2043/1946/22859/4593/7534/6405/22871/27067/23237/347902/2047/627/4776/9419/100528062/6792/9148/23657/10507/7474/57633/7097/57497/10611/8292/79012/2823/158038/6585/64284/57555/120892/23768/382/577/1942/3556/7415/10458/56850/378/203068/85358/9912/80725/547/84628…	204
BP	GO:0198738	cell-cell signaling by wnt	431/16611	454/18800	8.22096e-07	1.857e-05	1.2379e-05	59352/51384/8840/10413/115908/7471/9113/57805/1857/7162/6424/1277/2535/57664/164284/8323/25937/22943/10023/6425/51473/10076/6714/25876/26524/27122/2487/79816/406/4163/2719/1454/55612/4919/1540/4188/128272/26108/25/29969/3485/79809/85407/3675/8312/81847/1951/23399/27123/57216/6932/100507050/2932/83999/2262/8658/8322/3489/650/100133941/51421/4300/64750/5311/9368/11211/57658/6597/23240/6478/1456/712…	431
BP	GO:0042060	wound healing	408/16611	429/18800	8.30085e-07	1.86843e-05	1.24551e-05	3552/5154/5327/10630/1465/10451/8840/7076/10413/4627/5624/5265/1281/5359/710/2152/6288/51330/308/5329/22915/1277/1192/6431/170692/2069/8323/5054/640/3690/5873/84034/4846/6714/6385/2039/5321/2191/6556/958/4638/60/947/6239/26258/3170/7454/5155/5777/83706/10627/89781/55612/3162/11235/7450/6279/7056/959/57834/646960/128272/7422/4015/1289/3315/2004/966/2621/2192/5328/64581/3043/2125/6850/928/3678/5023…	408
BP	GO:0030534	adult behavior	135/16611	136/18800	8.72158e-07	1.94935e-05	1.29946e-05	10919/123803/9607/163175/84152/10269/1476/55636/3170/124925/1137/6900/2906/409/26058/1621/2043/27429/5090/22876/4852/2059/4923/6506/23657/2668/7248/585/4986/4988/2566/4204/1136/57555/85446/3066/91978/525/2019/127343/11315/7200/26090/85358/9698/27253/5071/5538/6623/50944/6712/4909/2257/238/57626/6387/9378/4985/2055/680/1600/583/80243/2693/5079/57502/2743/7545/8772/1497/5465/5728/351/3766/221935/28…	135
BP	GO:0072175	epithelial tube formation	135/16611	136/18800	8.72158e-07	1.94935e-05	1.29946e-05	115908/10395/1857/5293/2535/5727/7408/30812/8323/9585/57619/6385/84678/23242/25/5420/57216/8463/7798/7042/29072/80184/6046/79812/55081/1856/10653/836/8543/9968/2263/6659/2668/7248/7474/151449/4522/8820/2255/585/54361/57167/2648/653/23654/6201/5567/6664/6692/26585/8915/131405/133/51804/1950/8557/1499/6662/7849/5914/4036/56963/7189/655/4976/3091/6497/2909/51098/6789/317/7475/2247/5979/4524/5916/589…	135
BP	GO:0090316	positive regulation of intracellular protein transport	154/16611	156/18800	8.87592e-07	1.97691e-05	1.31783e-05	340146/1263/55741/9585/10134/54471/55294/51128/5880/89781/11235/56947/2621/23379/2932/4641/9747/3689/3208/5295/5580/80184/3717/27429/3684/51100/79778/3059/285966/4946/51614/118424/3458/51366/65018/7855/55696/51496/6934/8692/2810/2064/1459/89866/9520/3265/2040/27113/51201/161291/7323/10178/208/57506/11261/10055/10425/8536/5174/2931/54543/63928/1894/10411/4088/7531/7545/59286/5663/1432/9141/2010/83…	154
BP	GO:0071902	positive regulation of protein serine/threonine kinase activity	203/16611	208/18800	8.91351e-07	1.97837e-05	1.3188e-05	4057/5154/5899/8826/1857/84722/805/22943/6714/5871/958/54757/6188/10253/376497/904/5155/23411/11235/959/7422/8312/2321/2180/2185/6850/8322/6091/650/100133941/253260/5311/2043/11211/7984/1856/10961/3458/245711/3481/657/8091/7855/10979/146850/3357/7474/5770/7099/8115/1436/1027/896/120892/9344/6543/154/2064/81617/5604/54465/84962/92335/9623/23533/10125/3619/10333/3265/10926/5609/4908/4216/387/56892/…	203
BP	GO:0043122	regulation of I-kappaB kinase/NF-kappaB signaling	246/16611	254/18800	8.95267e-07	1.98016e-05	1.32e-05	4057/3552/10346/92610/843/841/684/3956/54209/1936/6275/9641/6398/972/1653/51246/114769/10206/958/356/23411/4919/3162/8904/4055/80216/25/79594/85363/6737/3315/11040/64581/286827/7132/117854/58509/284/57449/84433/4615/6772/920/10475/9100/8737/79931/389/1236/114609/80833/3965/7128/5987/9830/5966/8767/8878/51135/3123/10758/81858/10783/9188/65018/399/7037/7185/2697/3357/7474/8743/9516/7099/1902/10133/…	246
BP	GO:0002698	negative regulation of immune effector process	112/16611	112/18800	9.11266e-07	2.00164e-05	1.33432e-05	259307/3566/3958/10225/710/684/3077/6504/2213/100507436/196/84695/3718/5777/10875/11221/3162/729230/3575/3133/6688/966/5272/54542/1604/10859/51043/2896/284/409/7042/149041/3142/56833/4092/3598/3965/11314/7009/2294/336/3821/3071/613/725/55061/2302/84868/634/11005/2/6318/11213/722/3805/1380/6223/53833/115352/1379/604/335/5532/64127/8993/387837/4179/5169/9655/2241/282618/339390/3558/124626/27342/139…	112
BP	GO:0009185	ribonucleoside diphosphate metabolic process	112/16611	112/18800	9.11266e-07	2.00164e-05	1.33432e-05	205/57103/195827/2987/1723/55526/9759/2819/136332/387712/2645/2203/26289/11164/84433/51422/6774/8473/4907/7167/3458/2023/53632/4967/5313/790/402/50484/2033/4609/51085/3098/3607/26471/2027/26137/5563/5315/221937/441531/669/204/5213/203/54541/80201/8671/1739/3091/230/9611/5465/5663/351/28964/5224/11277/6521/229/26330/221264/5232/3692/5571/260425/3630/339123/405/2026/5562/6241/5027/51727/3643/6240/1…	112
BP	GO:0042129	regulation of T cell proliferation	171/16611	174/18800	9.24294e-07	2.02328e-05	1.34874e-05	259307/3552/10288/3958/916/79679/1051/11151/923/941/26191/6504/3659/8764/3600/246778/6385/9231/6188/3718/5777/6777/5074/5880/64926/868/959/729230/6352/1493/11035/3133/3485/23308/3115/6850/1604/26279/10859/10385/10457/7133/51043/84433/100133941/149041/970/3717/3146/6541/23240/7048/6693/284194/3965/1947/64115/80380/7535/8379/384/8767/836/3071/3481/3123/57045/942/7037/3572/4690/4004/10673/2302/12625…	171
BP	GO:0071248	cellular response to metal ion	187/16611	191/18800	9.46441e-07	2.06467e-05	1.37633e-05	5176/4499/84557/8826/3077/1728/2822/57103/241/2039/7226/4205/4884/4318/10105/2354/3162/8904/6263/4489/358/8437/7018/4496/26149/91683/29957/2203/4493/3736/3208/25932/9076/144402/5311/10058/1800/6857/817/23621/84329/22871/3707/4776/5025/246/1965/567/7474/151835/10235/5595/127833/8820/1027/811/120892/706/100271927/51760/3725/6261/1585/3727/79085/1050/90019/9066/148281/57192/8912/55512/2978/5563/5071…	187
BP	GO:0016055	Wnt signaling pathway	429/16611	452/18800	9.55172e-07	2.0766e-05	1.38429e-05	59352/51384/8840/10413/115908/7471/9113/57805/1857/7162/6424/1277/2535/57664/164284/8323/25937/22943/10023/6425/51473/10076/6714/25876/26524/27122/2487/79816/406/4163/2719/1454/55612/4919/1540/4188/128272/26108/25/29969/3485/79809/85407/3675/8312/81847/1951/23399/27123/57216/6932/100507050/2932/83999/2262/8658/8322/3489/650/100133941/51421/4300/64750/5311/9368/11211/57658/6597/23240/6478/1456/712…	429
BP	GO:0048872	homeostasis of number of cells	272/16611	282/18800	9.67947e-07	2.09722e-05	1.39803e-05	84524/8740/27240/5320/5293/11151/55113/132299/972/4846/57817/11167/202309/2039/9898/5896/7538/10320/3718/6777/3162/3635/2539/729230/7422/84662/3575/8444/819/25/11035/677/55904/6688/9733/23495/54542/2623/94081/26058/84636/5316/84433/6229/4090/149041/6772/3717/6774/3146/1233/23774/7984/1236/3059/3965/222642/317719/7128/5926/80279/3707/4067/55619/4352/836/3071/10758/23657/51301/11143/6659/613/567/40…	272
BP	GO:0006836	neurotransmitter transport	202/16611	207/18800	9.86713e-07	2.13063e-05	1.4203e-05	3690/55784/26258/8564/9899/815/8676/10211/91683/6865/2932/5023/9153/5582/84062/6857/3060/23621/9498/1268/63908/22871/136/6506/9627/6809/7779/6853/2668/5865/6533/1142/10675/9783/6580/127833/6570/5906/51248/6540/22895/6616/23557/6855/1136/120892/9381/9581/2852/134957/6539/64130/55117/1103/5579/10497/8825/2054/57030/1488/2030/90019/9066/3688/148/11315/112476/2332/8448/60482/54407/116443/3164/9342/50…	202
BP	GO:0061013	regulation of mRNA catabolic process	170/16611	173/18800	1.02996e-06	2.2165e-05	1.47755e-05	221662/9641/23034/56478/23185/57690/115572/3184/6556/7538/22794/7432/4848/9567/10949/8570/8241/677/57472/154197/10492/57060/54542/10140/22894/26058/4615/4116/149041/5580/79048/196513/11340/54890/114609/27161/23369/4292/28960/4869/11044/10758/27327/51010/9475/9924/2668/9513/166863/79675/9261/255967/1618/29883/7431/90806/64282/2332/678/131405/9698/57054/1994/11187/22849/29974/5436/10642/55095/12956…	170
BP	GO:1903052	positive regulation of proteolysis involved in cellular protein catabolic process	133/16611	134/18800	1.10357e-06	2.36692e-05	1.57782e-05	54209/1263/1075/10134/55294/6613/11236/1454/1191/149628/160418/5701/8312/2185/5704/9604/8975/2932/51343/127544/5347/10221/4092/11337/4287/84871/26259/6872/10399/255488/440730/55743/153769/91445/5706/120892/26263/7805/91304/1050/857/7415/90637/26471/29979/2332/7917/64110/3303/5071/2629/51136/1950/23640/131377/10425/2931/4780/57761/122809/344558/4193/1601/79699/85409/5663/5728/64326/1453/9992/8078/…	133
BP	GO:0021915	neural tube development	152/16611	154/18800	1.11145e-06	2.36787e-05	1.57845e-05	115908/7471/10395/1857/2535/5727/7408/1969/8323/9585/57619/6385/84678/23242/25/677/57216/23432/8463/7798/7042/29072/5311/6046/55081/1856/10653/836/8543/9968/6659/7248/9742/7474/55746/151449/221322/4522/585/57167/2648/653/23654/6201/2736/8854/2019/26005/5567/6664/6692/8915/131405/92344/133/200894/55182/5310/5914/3169/4036/56963/7189/655/4976/3091/6497/2909/51098/6789/2637/317/8646/140467/25776/566…	152
BP	GO:0051092	positive regulation of NF-kappaB transcription factor activity	152/16611	154/18800	1.11145e-06	2.36787e-05	1.57845e-05	4057/10346/5687/114769/8986/268/10206/958/6188/4919/6279/959/1191/11035/5583/815/121268/85363/6737/10211/5590/64581/3656/117854/338699/84433/4615/8809/10475/6774/8737/114609/3965/847/114548/6280/4923/5987/695/219790/9830/8767/4869/2319/7037/7185/7474/7097/7099/2033/23085/10542/5579/857/3556/11213/10333/4922/9252/26585/8915/3303/64170/5610/3654/177/7706/10935/6885/5478/238/5336/9575/8877/8517/7189…	152
BP	GO:0045165	cell fate commitment	257/16611	266/18800	1.13533e-06	2.40268e-05	1.60166e-05	51384/10630/10919/7471/63950/6778/9113/64641/5727/7490/30812/3199/22943/114836/7026/2114/55553/860/84695/7101/10253/3170/170825/10538/9480/11281/3714/7005/170302/57453/2139/3226/2623/56603/4090/650/8320/56833/6774/10716/2627/84504/6693/6929/182/1514/10215/80213/58158/639/90/3662/836/8543/7004/343472/2263/123169/657/7474/3791/1482/23168/429/151449/5396/6934/2255/8829/54361/120237/3574/4654/3593/23…	257
BP	GO:0051321	meiotic cell cycle	257/16611	266/18800	1.13533e-06	2.40268e-05	1.60166e-05	150280/10919/4627/2069/55810/9985/472/164045/2827/11022/143689/116369/5885/10096/11144/10744/51343/84944/89765/56603/5347/4880/221711/400629/10734/11077/4926/4292/245711/1325/225689/10111/27229/85378/1761/161829/10844/8243/8900/150365/122402/7474/55743/57820/375337/23304/728637/6196/54361/994/9134/91646/7272/811/11105/7155/10179/197342/85417/147872/256126/80010/171484/378708/10051/3619/10426/1005…	257
BP	GO:1905475	regulation of protein localization to membrane	169/16611	172/18800	1.14759e-06	2.42058e-05	1.61359e-05	6769/7130/3958/51225/54209/1969/64114/2039/131578/54471/60/2633/2719/5583/2934/56947/10268/1399/3675/65267/5590/163/4641/9747/3689/2262/3208/5295/23433/27237/8673/3684/8301/285966/11079/2042/9419/3458/8878/2181/23657/10399/1173/8326/388336/6809/4323/57120/25921/26119/55022/378884/5906/245812/57555/246329/2852/55625/2064/7430/342667/382/9528/3688/598/56850/3753/3265/2040/27113/51201/9912/112609/94…	169
BP	GO:0051648	vesicle localization	185/16611	189/18800	1.16668e-06	2.45272e-05	1.63501e-05	129880/55062/5873/79443/6385/51128/5871/26258/81565/4935/63971/79083/79953/553115/7251/4542/29058/5590/4033/64005/4641/55773/10972/84062/9146/4645/8301/1176/22871/22906/84364/3458/10749/4643/225689/84984/65018/9001/6853/10652/23332/585/8452/23557/64284/57555/120892/388552/4430/26985/9024/91978/3800/51168/65082/66008/89866/8825/10540/64149/3798/254263/4133/10125/55088/10016/1780/55512/27253/547/46…	185
BP	GO:0097191	extrinsic apoptotic signaling pathway	215/16611	221/18800	1.17669e-06	2.46562e-05	1.64361e-05	3552/10413/6272/3958/841/2730/51330/1495/50486/5054/2537/81618/64114/85450/4846/6714/3429/8794/356/637/3162/1540/162989/4055/597/6688/3383/7132/2139/2932/2623/7133/2923/5295/7042/6672/1621/970/3717/27429/8737/219699/11337/5196/3655/6478/7128/666/2872/2261/3685/90/3458/29949/85508/7185/2668/79370/8743/3624/9994/2243/6934/2255/5894/8829/8692/10017/5366/3574/2852/653/3875/151112/55179/3570/857/64112…	215
BP	GO:0006816	calcium ion transport	403/16611	424/18800	1.21728e-06	2.54232e-05	1.69474e-05	6769/79054/3627/10288/9033/3958/779/4283/6373/11151/930/55013/805/29763/287/6548/56704/55584/4846/140738/1234/7226/2903/10269/4638/55636/196996/356/51393/3718/6547/5155/79041/5777/778/10523/255022/6263/2539/6352/59283/80024/25/815/81671/10268/7224/7466/3783/8416/65267/2621/55503/8989/489/2185/55283/2645/1137/8398/10203/2906/5023/10859/353514/114789/1230/3208/409/5031/5999/2829/80228/55858/920/103…	403
BP	GO:0051099	positive regulation of binding	168/16611	171/18800	1.27853e-06	2.66152e-05	1.7742e-05	115908/83666/5899/5329/3077/64641/3005/805/640/4233/55693/26086/4318/285381/23129/1981/25/149628/6737/10211/117854/2932/55323/2296/650/3717/2043/3146/79139/6281/5516/9026/627/3662/3458/8767/3646/6872/8932/1965/567/7474/4931/6934/2033/8829/4609/23028/10542/64400/120892/2280/4654/151636/4830/857/9314/3416/1488/26206/7448/79618/11315/4140/1054/8664/2332/3148/65057/5071/3925/3670/1950/6135/4686/4760/…	168
BP	GO:0002819	regulation of adaptive immune response	184/16611	188/18800	1.29511e-06	2.67853e-05	1.78554e-05	51111/259307/3566/6778/3077/54209/941/3122/6504/3659/8764/2213/246778/64332/5321/8631/196/6556/84695/91543/958/718/54537/7454/3718/5777/3140/11221/23411/8741/729230/3575/11035/3133/5590/64581/54542/1604/10859/7133/51043/22890/7468/149041/3142/920/8809/3146/3665/23529/4092/10865/7128/962/9173/114548/5987/79915/695/3821/4292/8767/3071/3123/51010/246/7037/7855/3572/725/81545/567/10673/54795/55061/23…	184
BP	GO:0007051	spindle organization	184/16611	188/18800	1.29511e-06	2.67853e-05	1.78554e-05	4627/26112/84722/55857/54617/6683/6188/79598/4733/10636/80258/440270/29082/8658/26054/79998/5347/79884/10579/79441/4926/4292/54801/126353/49856/10783/225689/57405/27229/85378/10844/8243/3837/55125/152185/23332/3796/54930/7272/4204/23172/7756/79643/91782/7430/147872/114327/10540/7415/90990/10735/3619/55835/10426/203068/10274/56647/1062/2770/1213/3303/387/6867/3925/153241/54627/51115/1639/51119/531…	184
BP	GO:0035148	tube formation	150/16611	152/18800	1.3913e-06	2.84971e-05	1.89965e-05	115908/10395/1857/5293/2535/84913/5727/7408/30812/8323/4781/9585/57619/6385/84678/23242/7422/25/5420/57216/3198/8463/7798/7042/29072/80184/6046/79812/55081/7534/1856/10653/836/8543/9968/2263/6659/2668/7248/7474/151449/4522/8820/2255/585/54361/57167/2648/653/23654/6201/10806/5567/6664/6692/10018/26585/8915/131405/133/51804/1950/8557/1499/6662/7849/5914/4036/56963/7189/655/4976/3091/6497/2909/51098…	150
BP	GO:0050905	neuromuscular process	150/16611	152/18800	1.3913e-06	2.84971e-05	1.89965e-05	6769/2643/1134/2903/10269/6547/25/3074/3198/3226/2906/3736/220/64220/1311/26058/1200/4861/84504/23621/7143/4625/2307/613/64072/497189/7140/6939/429/65217/84197/844/4747/7138/4204/57555/246329/8925/7401/124093/342667/9446/7134/51761/112476/57680/2760/116443/3164/5071/2629/23261/55737/84502/50944/1756/23543/4647/8557/1639/2257/16/9378/2055/5457/57152/7137/2946/2743/5728/340784/351/1760/113246/5458/…	150
BP	GO:0070507	regulation of microtubule cytoskeleton organization	150/16611	152/18800	1.3913e-06	2.84971e-05	1.89965e-05	84722/2242/4233/6683/25876/157922/6188/79598/4733/1540/25/8045/1003/221074/2932/29082/27124/246176/26054/51199/79998/5347/10142/55201/79884/23299/1946/4926/4131/2042/10263/6249/26146/225689/24139/79969/10013/23187/5879/23332/57662/402/1859/636/1027/4204/4137/10382/11186/79643/91782/4133/5563/2770/8874/1213/3303/387/403/3925/57606/10300/1639/5310/348235/23116/128866/10634/57551/50861/29899/55521/5…	150
BP	GO:0006814	sodium ion transport	241/16611	249/18800	1.43277e-06	2.91626e-05	1.94401e-05	9033/2745/6548/348980/4846/7226/6547/57282/4302/80024/7533/65267/53827/5349/6328/57657/479/482/5311/9368/23412/54997/6324/8884/817/6524/476/9498/10008/57835/5025/128414/83959/9311/6557/6533/6327/23439/150684/6528/1482/5774/54795/53373/6336/6540/8913/150094/6543/6550/154/91749/6332/6539/55117/525/123041/11280/201780/483/10991/6527/57030/159963/151258/53826/219931/6554/8912/2040/60482/54407/6330/10…	241
BP	GO:0043583	ear development	213/16611	219/18800	1.43297e-06	2.91626e-05	1.94401e-05	5154/115908/7471/2535/8323/3199/26020/55584/1889/6385/2487/55636/10253/4919/3714/55283/3198/83605/220/64220/3208/5013/7042/650/55084/80184/3249/2043/9368/6935/182/2103/1856/79955/8516/8549/11020/2263/613/64072/1301/497189/7474/121227/4094/6939/5595/65217/5396/8820/131149/2255/1027/645104/3638/7401/653/9261/51168/525/6657/8825/1050/54845/51761/1280/6926/10018/596/51804/4647/4760/8929/219736/8557/2…	213
BP	GO:0051260	protein homooligomerization	183/16611	187/18800	1.43753e-06	2.91626e-05	1.94401e-05	6999/27316/362/92610/115362/9033/79792/7408/197259/241/348980/6683/7226/84282/255022/6263/32/6648/2744/54968/8989/30844/3736/220/1311/22890/6247/9908/5961/84433/5551/5311/170850/361/493829/3737/3251/57528/31/386617/51466/64784/3748/4143/284252/4355/171425/54974/155061/57673/23237/23627/3788/3790/25923/1429/6506/7442/3750/567/79047/3834/54795/10367/131149/92799/89872/79689/6261/130535/8854/83862/7…	183
BP	GO:0044782	cilium organization	366/16611	384/18800	1.4455e-06	2.92313e-05	1.94859e-05	54970/92749/10413/129880/79874/200162/25937/29887/127733/339145/79864/348807/23157/51473/80210/25876/285331/257236/4117/84229/83547/79598/6674/1540/80216/136332/2934/9480/387712/79809/51314/55172/161502/10096/57216/30844/164781/220136/2932/83659/286464/80127/143941/30846/89765/27152/9576/22897/80184/84062/64518/5311/9368/9662/196383/152015/1641/55081/64422/79140/84223/8814/282809/79582/85478/1171…	366
BP	GO:0060541	respiratory system development	198/16611	203/18800	1.47996e-06	2.98334e-05	1.98873e-05	1116/5154/10630/10413/445/1281/93/84525/6431/7490/4781/3488/4846/55294/84695/9231/55636/10253/2719/55211/54206/7422/4015/3675/10252/1522/54542/220/64220/53834/64399/57493/83931/7534/7048/2627/23347/340419/2294/57333/26257/51668/23657/147372/2263/657/7068/4323/2735/7474/3791/5950/2252/429/5595/2302/8820/2255/2033/79925/5251/3202/7477/4087/5604/2736/8854/1050/26154/3290/100/6664/7917/55512/80004/95…	198
BP	GO:0008360	regulation of cell shape	149/16611	151/18800	1.55644e-06	3.1276e-05	2.0849e-05	10630/4478/4627/10395/254065/11151/2242/29780/55843/57381/55785/57619/2039/752/7940/93663/10269/445815/2268/152273/5880/23129/103910/7422/23221/3074/55660/2185/3689/3679/23433/6347/3249/9368/2335/389/9723/2059/29984/23136/9948/54873/54014/388/10507/399/10979/5879/374872/3791/1902/1436/9344/11149/148170/5064/23654/7430/23268/10458/989/157285/121512/387/3055/56990/7429/55558/2038/5364/6354/2147/915…	149
BP	GO:0000018	regulation of DNA recombination	130/16611	131/18800	1.57008e-06	3.13524e-05	2.08998e-05	51111/6778/54799/3005/158880/115004/80314/26122/10933/958/60/54537/7454/23126/8741/64210/3575/6944/7468/10524/29072/57634/23529/56893/23347/79915/7014/4292/51010/10111/7037/196528/149840/23028/11105/8607/121260/56916/92797/8089/64110/6118/112441434/6830/3006/63979/84787/55183/3838/604/10459/9466/3009/3007/55135/23514/132243/2187/441161/7158/55086/10189/9643/5888/1111/116028/54386/142/64769/3008/1…	130
BP	GO:0006275	regulation of DNA replication	130/16611	131/18800	1.57008e-06	3.13524e-05	2.08998e-05	10919/6282/2069/54617/54891/10269/11177/57695/84289/25792/146059/80169/5983/3060/9767/79915/8412/11143/2735/91607/54921/56897/79913/3980/79960/7528/2736/8607/389643/23063/10926/5930/23595/10361/55704/84296/54107/79596/1950/51659/59343/83444/8317/604/23244/30968/90381/2021/51053/7157/6742/466/990/5985/23175/51377/64710/10445/64769/10856/8467/890/157570/545/79075/9837/675/546/50485/86/64061/54962/2…	130
BP	GO:0019722	calcium-mediated signaling	197/16611	202/18800	1.63733e-06	3.24916e-05	2.16593e-05	79054/11123/916/54209/29995/10803/2274/805/287/6548/2039/1234/55784/10134/7226/2903/10269/2633/79041/4935/10523/729230/185/1827/2358/64581/2185/6850/2932/2906/1230/3208/10663/2829/920/10316/1233/9034/22859/1236/817/5533/6262/5350/7535/6364/695/2281/4776/4773/22953/5025/8445/168620/7462/7852/576/1232/3576/6403/3357/3791/1131/54795/3579/845/844/100137049/120892/4137/6543/1240/51554/51643/84174/1230…	197
BP	GO:1902115	regulation of organelle assembly	197/16611	202/18800	1.63733e-06	3.24916e-05	2.16593e-05	10919/4478/10413/79874/5899/51225/64147/55062/57535/51473/6714/6385/141/4117/4884/79598/4733/1540/4848/6048/2934/57472/7251/2932/29082/78999/9908/26054/5347/9662/7984/51100/64422/118611/4926/8814/4869/6792/49856/23224/10432/10807/225689/9924/65018/51364/51112/9001/152185/9742/8897/7840/585/120892/9637/2648/79643/91782/85459/7430/10806/255967/4089/3556/64112/55835/26471/989/10198/5563/3303/387/305…	197
BP	GO:0019058	viral life cycle	304/16611	317/18800	1.67238e-06	3.3084e-05	2.20542e-05	4057/4938/3669/10346/23601/4939/5359/60489/684/3956/10410/1969/941/6504/972/8764/3690/3429/1234/4940/131578/91543/8547/55065/84875/200316/1656/6352/8638/4684/2934/858/85363/185/7251/6737/3916/2621/27074/3383/55337/286827/64135/117854/1604/3678/29082/9076/10581/682/200315/10663/5806/8673/920/6347/10475/1948/5034/91392/3695/3965/5481/4261/1514/5987/2838/1508/2219/27350/3685/9830/3123/55207/5297/729…	304
BP	GO:0010639	negative regulation of organelle organization	340/16611	356/18800	1.74076e-06	3.42294e-05	2.28177e-05	10040/10919/10413/10288/10395/23075/10449/3178/11151/57103/4233/6714/7114/25876/2039/472/157922/4117/7454/79598/10105/822/1191/79594/2934/1003/5885/54961/84952/115209/10744/146206/29082/8658/409/27124/5295/57175/80169/5347/9353/5580/253725/91663/830/832/9882/79822/11344/55604/666/2059/9026/4131/160140/8379/7014/54908/4869/9463/163782/10432/24139/10111/9587/8326/65018/7037/1761/10013/338657/291/54…	340
BP	GO:0016331	morphogenesis of embryonic epithelium	148/16611	150/18800	1.74102e-06	3.42294e-05	2.28177e-05	51384/115908/10395/1857/2535/5727/7408/30812/8323/9585/57619/6385/84678/23242/25/3714/7424/57216/2926/220/8463/7798/7042/29072/6046/55081/1856/10653/836/8543/9968/2263/6659/2668/7248/7474/151449/4522/2255/585/54361/57167/2648/653/23654/7477/6201/8854/5567/6664/6692/26585/8915/131405/133/51804/1499/7482/6662/7849/57669/5914/4036/23213/56963/7189/655/4976/5100/3091/6497/2909/51098/6789/317/7475/367…	148
BP	GO:0009132	nucleoside diphosphate metabolic process	129/16611	130/18800	1.76568e-06	3.46072e-05	2.30696e-05	122481/205/57103/195827/129607/2987/1723/55526/9759/2819/136332/387712/2645/2203/26289/11164/84433/51422/6774/8473/4907/7167/3458/8382/2023/53632/4967/5313/4831/790/402/50484/2033/4609/51085/3098/4830/953/3607/26471/955/2027/26137/5563/5315/221937/441531/669/204/5213/283927/203/54541/80201/347736/377841/8671/1739/3091/230/9611/5465/5663/351/28964/5224/11277/6521/4832/229/26330/221264/5232/3692/55…	129
BP	GO:0072594	establishment of protein localization to organelle	409/16611	431/18800	1.8282e-06	3.57229e-05	2.38133e-05	6272/54830/84268/23534/23471/56478/84709/10134/55294/10575/5880/6734/6747/89781/55612/637/868/1191/59283/29969/56947/3920/4285/7251/3916/51172/27074/51555/3308/6850/602/29082/10073/284/5514/5295/5580/3587/3717/3841/9146/27429/6774/60559/51100/79778/3059/7128/6262/23480/84134/9818/160140/1026/4121/118424/3458/51366/5903/387990/8878/152485/10758/92609/56993/9631/65018/7855/3837/26517/9221/55696/908…	409
BP	GO:0006898	receptor-mediated endocytosis	238/16611	246/18800	1.89689e-06	3.6839e-05	2.45573e-05	4983/6424/3077/5054/22943/2213/4481/3690/22848/23607/967/718/1191/51429/7422/59283/7018/858/124930/10268/10211/55788/2358/55589/6850/928/432/10203/163/6900/10859/3689/284/3208/409/201176/9873/84062/4043/1948/50632/3684/22876/7048/8301/22925/1514/9026/3482/79890/23237/3685/9463/20/1173/7037/3576/5879/567/3357/26119/85021/60682/2207/3579/9829/100506013/636/6616/43/341/8906/284697/57720/8218/66000/1…	238
BP	GO:0071695	anatomical structure maturation	238/16611	246/18800	1.89689e-06	3.6839e-05	2.45573e-05	4057/7471/29842/162466/2069/30812/29887/3600/9985/163175/860/718/83853/55612/712/2539/7422/11022/116369/1003/64581/2185/11144/6900/7704/26468/7042/650/4880/4825/23774/152015/2261/695/9463/168620/1258/10507/7855/11173/132141/4313/2697/7474/51360/3791/429/4653/6196/994/144347/23028/4204/59277/5745/120892/26256/54763/57560/3202/11057/6261/123041/8854/10481/30813/8399/8578/1050/11005/10682/577/6366/1…	238
BP	GO:0016197	endosomal transport	224/16611	231/18800	1.94622e-06	3.76408e-05	2.50918e-05	6272/23585/64145/23023/150368/10228/26258/83547/7454/51429/64129/30844/29082/30846/738/84440/253725/55773/9146/50632/22876/4645/79778/8301/5987/387680/286753/23258/8878/404636/10807/55207/23603/10652/254122/85021/7874/7840/653440/23274/64284/23085/84661/120892/57724/11149/9527/284697/9581/57706/8218/79643/91782/83874/382/7415/653145/9367/55745/112936/56850/9372/144717/54551/29886/51201/9912/50618…	224
BP	GO:0018394	peptidyl-lysine acetylation	180/16611	184/18800	1.96447e-06	3.76408e-05	2.50918e-05	7703/54799/57325/80314/26122/284058/8986/6877/10933/10269/60/27097/23411/84289/55167/23181/7994/51200/6688/55209/9862/8520/56970/3054/6944/10524/4300/26038/57634/8473/23774/10865/10847/9767/57326/57673/23522/55689/3662/195814/84148/8464/6872/79969/11091/11143/6659/117143/253175/93624/9913/5595/2033/4204/79960/3066/4654/80218/2648/8607/4089/8861/6871/11315/8202/7917/9252/5563/6873/8089/6418/4582/2…	180
BP	GO:0061448	connective tissue development	251/16611	260/18800	1.96765e-06	3.76408e-05	2.50918e-05	1116/3213/8840/7076/1281/11061/1277/64641/7490/30812/2202/4781/2822/140606/861/3696/55553/860/2487/9658/10269/947/5155/91355/23411/633/4015/871/1289/6688/25979/864/114789/1311/7704/4090/650/4880/4092/10865/6935/7048/340419/57326/4192/4209/3491/2261/11145/25884/657/8091/55959/1301/11173/7474/4094/7494/3200/89766/54795/5595/151449/5467/5396/2828/585/8692/4256/144347/5745/51222/23314/57560/2648/3202…	251
BP	GO:0016573	histone acetylation	164/16611	167/18800	1.96772e-06	3.76408e-05	2.50918e-05	7703/54799/57325/80314/26122/284058/8986/6877/10933/10269/60/27097/23411/84289/55167/7994/51200/6688/55209/9862/8520/56970/3054/6944/10524/4300/26038/57634/8473/23774/10865/10847/9767/57326/57673/23522/55689/3662/195814/84148/8464/6872/11091/11143/117143/253175/93624/9913/5595/2033/4204/79960/4654/80218/2648/8607/4089/8861/6871/11315/8202/9252/6873/8089/6418/4582/200186/80764/3670/51105/54107/688…	164
BP	GO:0030216	keratinocyte differentiation	164/16611	167/18800	1.96772e-06	3.76408e-05	2.50918e-05	3552/51384/10413/9113/6431/1969/2069/23086/7538/1775/54206/5583/677/7251/1475/2125/9119/25932/56603/2296/27152/23596/135228/182/374454/5493/4926/3848/836/3204/81858/7421/3887/9475/2355/613/427/25818/3850/7474/340654/3889/4831/1041/2810/3888/3892/8394/6699/5604/3664/643418/26154/247/8202/337968/5453/4014/353141/130120/5068/3872/6700/448835/5339/6789/163778/80173/8689/3856/85354/84648/6701/388697/3…	164
BP	GO:0018105	peptidyl-serine phosphorylation	302/16611	315/18800	1.98122e-06	3.77856e-05	2.51883e-05	9113/5165/9641/11011/22943/8986/6714/2039/26524/472/624/10253/5155/1454/6195/11235/7422/8444/1981/5583/815/10268/6197/8312/5590/2621/6850/117854/2932/27330/284/8658/409/27124/5582/23515/5347/10142/5580/253260/5603/8737/4092/22876/3059/7048/817/1456/11184/2872/283629/627/8412/3458/8767/8445/6872/10399/10783/9475/65018/7037/8091/10013/4690/7474/282974/375449/11137/6199/23049/1859/6196/8115/79012/58…	302
BP	GO:2001234	negative regulation of apoptotic signaling pathway	223/16611	230/18800	2.14118e-06	4.07144e-05	2.71407e-05	3552/10413/3958/7703/2730/57805/10449/5329/1495/5054/2537/972/64114/85450/4846/6714/624/26574/4318/10105/23411/637/3162/1191/6648/7466/3315/3383/2139/2932/2623/409/4841/27429/8737/219699/51616/3070/5196/3655/6478/7009/7128/666/79915/56917/627/4150/3685/219790/90/1032/29949/85508/8326/8382/65018/56624/8876/2668/2023/7494/5770/291/25946/2243/3578/6934/2255/50484/5894/8829/54361/551/10017/23028/1208…	223
BP	GO:0008217	regulation of blood pressure	179/16611	183/18800	2.1795e-06	4.13197e-05	2.75442e-05	2643/2013/9607/5724/7026/1889/4846/4886/947/5155/3162/9365/5021/6648/5742/185/6869/2621/7424/3043/59342/1522/5023/2702/5345/57085/51752/29953/1278/134/4843/1535/4852/66002/3291/476/1268/4923/57835/56670/80763/9424/22953/5025/7442/151/6866/81285/153/6196/585/55328/551/4204/10391/2837/154/5125/796/1585/148/91608/2028/387/89797/133/8195/27035/4041/23576/1636/83988/4012/5331/7168/680/2931/1906/2767/9…	179
BP	GO:2000058	regulation of ubiquitin-dependent protein catabolic process	163/16611	166/18800	2.19111e-06	4.14164e-05	2.76087e-05	7471/9113/57805/3077/1263/23429/11011/84074/10134/55294/6613/11236/1454/1191/819/149628/8312/2185/9604/2932/51343/127544/143941/5347/6599/10221/8473/4092/56893/11337/5887/84871/26259/6872/10399/255488/440730/51035/55743/150684/153769/7874/120892/26263/7805/1459/6201/1050/857/7415/90637/51322/11315/29979/7917/23376/64110/3303/7337/5071/2629/1950/23640/6135/9683/131377/4534/10425/10755/5371/2931/47…	163
BP	GO:0071674	mononuclear cell migration	194/16611	199/18800	2.21554e-06	4.17544e-05	2.7834e-05	3627/5919/4478/3683/3958/8740/6288/6373/5175/5293/6504/5054/8764/1234/7226/5155/729230/6352/7499/80024/140885/11035/131450/1399/6688/2358/2621/3383/2321/2185/64005/257144/1230/9353/56833/6347/6846/3146/7984/1236/3695/6693/3965/2059/4192/7535/6364/2838/4067/7852/4681/51676/7474/100528032/54795/240/5595/3579/1436/2526/811/57402/1240/23143/653/796/79647/9943/3570/5340/148823/6366/22914/120425/26585/…	194
BP	GO:0050714	positive regulation of protein secretion	127/16611	128/18800	2.2326e-06	4.19518e-05	2.79656e-05	3552/54209/640/2822/7226/23086/23607/7447/8111/4826/5106/3783/7424/388581/2645/8398/7042/4825/10972/3717/5007/5481/25874/3123/2696/6717/6659/7097/7099/81285/5950/54795/2243/5467/8736/5122/6934/10802/43/57555/64083/2852/7430/382/10497/7273/2850/7200/51768/65985/10059/55737/79971/3670/5715/23400/5478/5213/27063/94121/9854/2746/51124/5532/3091/2244/169026/3596/8660/114131/2641/11132/50855/55763/2695…	127
BP	GO:0046474	glycerophospholipid biosynthetic process	208/16611	214/18800	2.34006e-06	4.38418e-05	2.92254e-05	5154/2171/5359/5293/56994/8835/1040/55650/23167/8395/51604/3613/472/5321/10026/80157/8651/376497/84803/5155/80271/55326/150763/3635/54675/8776/1154/25979/126969/8398/9021/27124/5295/55300/55224/8525/22876/80055/3707/336/79575/2181/80235/5297/246/5277/10380/3612/3931/8526/146850/3357/8897/8821/57605/23049/3631/10555/54965/8394/84174/1103/84962/8503/79143/9488/129303/10390/85465/57217/3628/51227/52…	208
BP	GO:0050796	regulation of insulin secretion	145/16611	147/18800	2.43552e-06	4.54964e-05	3.03285e-05	9607/640/2822/7226/406/3170/7447/91355/8111/4826/5106/6352/80024/388581/2645/8398/415116/4825/3717/1946/4843/6755/5007/1268/57818/2281/3458/25874/9463/6833/3123/2696/6717/6659/5950/54795/240/5467/3172/6934/6616/57555/23409/90007/2852/9024/26154/9066/2850/5978/7200/51768/65985/5071/3670/4041/5715/5530/130399/5213/3382/4760/3625/94121/9575/3767/9572/9854/2746/5532/2693/3091/131177/169026/4544/8660/…	145
BP	GO:0048706	embryonic skeletal system development	126/16611	127/18800	2.51028e-06	4.67558e-05	3.11679e-05	3213/3214/7703/81031/54799/1277/3215/3199/860/3217/3212/3227/4188/57453/3198/56243/29072/5087/3203/1954/6935/7048/3204/9968/2263/55959/4323/1301/9742/7474/3231/27173/3200/5950/3211/8092/4522/5396/3201/23314/5125/3202/4087/10265/1280/6664/3216/1746/51804/6670/1499/3225/29985/1745/9775/23213/3221/655/64131/1739/5079/3219/579/7481/4088/3340/1909/642658/221044/6913/7483/3233/9464/80199/4617/57728/320…	126
BP	GO:0001505	regulation of neurotransmitter levels	207/16611	213/18800	2.58024e-06	4.77794e-05	3.18503e-05	26002/3690/55784/5153/26258/8564/815/8676/10211/91683/6865/2932/5023/5582/2644/1621/84062/6857/3060/23621/9498/1268/63908/22871/136/6506/9627/6809/7779/6853/2668/5865/1142/8292/10675/9783/6580/127833/6570/5906/51248/6540/22895/6616/23557/43/6855/1136/51222/120892/9381/9581/2852/134957/6539/64130/1103/5579/10497/8825/2054/1488/2030/90019/9066/3688/148/11315/747/112476/2332/8448/60482/116443/3164/9…	207
BP	GO:0031396	regulation of protein ubiquitination	207/16611	213/18800	2.58024e-06	4.77794e-05	3.18503e-05	83593/9111/26191/55294/54765/6188/10253/84875/868/819/25/7466/553115/8312/51343/143941/284/409/5582/5347/6167/92369/8473/79139/4092/11337/26232/6478/7128/80279/8767/51366/8878/6872/55100/65018/6659/51035/55743/56160/150684/153769/85453/378884/254170/10196/8452/23028/120892/55208/2280/706/339745/151636/7805/6201/10625/648/857/3320/378708/7375/11315/10016/29979/78990/23376/8915/3303/7337/5071/23142…	207
BP	GO:0007204	positive regulation of cytosolic calcium ion concentration	311/16611	325/18800	2.60195e-06	4.80417e-05	3.20252e-05	3627/80045/779/23075/6288/4283/6373/11151/930/10803/56477/805/287/56704/55584/1234/10134/8477/7226/624/2903/55636/2357/356/51393/3718/6547/79041/5777/778/10523/6263/5021/1903/729230/6863/80024/25/1043/79608/10268/7224/185/5733/6869/2358/55503/8989/5734/2185/55283/338557/8398/1604/2906/5023/887/2623/1230/2830/5031/84636/2785/100133941/10663/2829/3717/10161/5311/3146/187/1233/9034/1236/57190/27334/…	311
BP	GO:0030705	cytoskeleton-dependent intracellular transport	192/16611	197/18800	2.70877e-06	4.95721e-05	3.30454e-05	6683/79443/84709/4117/26258/81565/63971/4744/79809/3916/3315/4542/5590/84376/84790/64005/4641/55201/84062/23299/50632/55081/4645/10376/57576/4131/1176/27067/7014/117178/22906/84871/2319/10749/4643/26146/23224/22858/55207/11020/79989/89941/9001/10013/29911/9742/6103/166379/57662/636/23557/4747/8636/388552/4430/4137/6421/26985/89891/66000/3800/51168/66008/3798/254263/4133/55288/10125/55088/199953/3…	192
BP	GO:0099003	vesicle-mediated transport in synapse	192/16611	197/18800	2.70877e-06	4.95721e-05	3.30454e-05	4983/3690/60/26258/154664/79953/8676/91683/2932/5023/3208/5582/6455/84062/1948/50632/6857/8301/23621/5533/9498/1268/63908/29993/22871/23237/136/5575/1173/6809/6853/5865/1142/10675/9783/9829/127833/6570/5906/6616/23557/6855/115677/57555/120892/9381/284697/9581/9024/134957/273/382/5579/10497/2054/57030/1488/90019/9066/148/56850/112476/2332/8448/8927/50618/11069/27253/116443/9342/22930/55737/6623/11…	192
BP	GO:0000725	recombinational repair	161/16611	164/18800	2.71596e-06	4.95721e-05	3.30454e-05	79728/54799/158880/54617/115004/80314/26122/9985/55693/10933/472/60/54537/7454/23126/27343/64210/5885/7486/11144/6944/10524/29072/57634/5980/56893/23347/196528/6119/149840/23028/3980/7528/6421/147872/8607/51444/80010/92797/8089/64110/6118/112441434/254394/84296/9401/51659/63979/55183/4175/5890/8317/10459/10213/126074/65123/23503/2072/55135/58493/23514/2187/441161/7158/55086/4172/9643/5888/119392/…	161
BP	GO:0001764	neuron migration	161/16611	164/18800	2.71596e-06	4.95721e-05	3.30454e-05	1281/51473/7026/9585/389549/81565/285313/23284/54328/23060/7422/815/1399/3675/2621/137970/170302/85451/22854/6900/26468/4825/6774/1233/1641/9856/10371/4131/4192/58158/84623/6792/116983/85508/7852/11023/343472/8846/2676/10844/5879/2697/54986/429/585/2823/8829/84197/5592/161582/653464/23314/7155/23654/23768/10806/167826/56751/79791/23380/1630/55079/84628/9201/57698/3084/340533/6656/8929/1499/54541/…	161
BP	GO:0009135	purine nucleoside diphosphate metabolic process	103/16611	103/18800	2.79546e-06	5.07324e-05	3.38188e-05	205/57103/195827/2987/55526/9759/2819/136332/387712/2645/2203/26289/84433/51422/6774/8473/4907/7167/3458/2023/53632/4967/5313/402/2033/4609/51085/3098/3607/26471/2027/26137/5563/5315/221937/441531/669/204/5213/203/54541/80201/8671/1739/3091/230/9611/5465/5663/351/28964/5224/11277/6521/229/26330/221264/5232/3692/5571/260425/3630/339123/405/2026/5562/5027/3643/11182/5214/9414/5207/1740/89/50808/863…	103
BP	GO:0009179	purine ribonucleoside diphosphate metabolic process	103/16611	103/18800	2.79546e-06	5.07324e-05	3.38188e-05	205/57103/195827/2987/55526/9759/2819/136332/387712/2645/2203/26289/84433/51422/6774/8473/4907/7167/3458/2023/53632/4967/5313/402/2033/4609/51085/3098/3607/26471/2027/26137/5563/5315/221937/441531/669/204/5213/203/54541/80201/8671/1739/3091/230/9611/5465/5663/351/28964/5224/11277/6521/229/26330/221264/5232/3692/5571/260425/3630/339123/405/2026/5562/5027/3643/11182/5214/9414/5207/1740/89/50808/863…	103
BP	GO:0051962	positive regulation of nervous system development	260/16611	270/18800	2.83814e-06	5.13607e-05	3.42376e-05	23440/5176/63950/7162/29882/30812/9820/9231/81565/4099/8482/140578/51393/1627/23129/5021/170825/7422/1826/10636/51265/5583/23316/27286/7224/79953/5324/7424/4076/443/7133/6091/51199/650/9353/4825/139065/2043/1946/23529/1954/2335/11344/84504/10215/4131/4192/22871/27067/347902/2047/627/4067/3458/100528062/26259/6792/9148/7852/10507/5764/9001/3572/57633/7097/644943/57165/429/8829/4609/4988/4747/15803…	260
BP	GO:0007599	hemostasis	220/16611	227/18800	2.84902e-06	5.14116e-05	3.42715e-05	5154/5327/10630/1465/10451/4627/5624/5265/1281/5359/710/2152/6288/308/5329/22915/1192/170692/8323/5054/640/3690/5873/84034/4846/6714/2039/5321/2191/958/60/947/26258/3170/7454/5155/5777/83706/10627/89781/7450/7056/959/57834/646960/3315/966/2621/2192/5328/3043/6850/928/5023/2623/4778/1311/5345/5580/84062/3717/8525/2335/5196/2313/3818/29071/10544/4067/3848/4352/23657/151/3827/3572/725/7980/8526/6403…	220
BP	GO:0007416	synapse assembly	176/16611	180/18800	2.97427e-06	5.352e-05	3.56771e-05	84885/7162/51225/64101/22943/9231/257194/4884/23129/23284/5021/1826/1981/23316/27286/79953/1399/55209/78999/139065/1948/1946/4593/53942/4131/22871/27067/347902/2047/627/84623/100528062/56126/2554/56127/10507/7855/7474/57633/7097/10611/8292/2823/2566/158038/43/6585/4204/64284/57555/26167/23654/23768/382/56133/577/3556/23363/85358/27020/8927/56130/27253/84628/266743/55737/654429/51804/6259/3084/228…	176
BP	GO:0051170	import into nucleus	160/16611	163/18800	3.02331e-06	5.42493e-05	3.61632e-05	54830/84268/23534/3178/56478/10553/55612/868/29969/60468/6850/602/10073/284/5514/5295/5580/3717/3841/6774/3059/9818/1026/3458/51366/5903/8878/10758/9631/3837/9221/55696/55746/8692/137735/120892/55374/10762/11142/23511/1994/11331/79711/5569/79902/5530/402569/57506/11261/4928/8021/4321/727851/3838/285877/5371/57122/63928/948/6789/1894/7157/4088/84220/7545/1408/100101267/23742/5663/1432/6396/4792/40…	160
BP	GO:0072006	nephron development	143/16611	145/18800	3.04501e-06	5.44851e-05	3.63204e-05	10413/7471/255743/8826/5175/5727/7490/30812/25937/3913/947/3217/5155/2719/7422/8842/3675/5420/9788/284/2296/26508/650/100133941/6772/5311/5087/54798/3237/182/84623/4643/55959/2668/55746/2302/2828/4868/54361/4609/7477/3570/4089/29927/3611/2028/26585/285/596/4854/9863/51804/79902/8710/1499/7482/6662/7849/5310/23213/655/57122/55366/1739/64412/7481/7475/2247/9500/65266/4435/54806/1909/1285/5979/4811/…	143
BP	GO:0008361	regulation of cell size	175/16611	179/18800	3.29825e-06	5.88512e-05	3.92309e-05	10451/4478/51520/29882/6696/10723/81565/4099/8482/51393/1627/7504/358/7422/1826/3575/51265/25/7224/3783/84561/65267/2932/4825/9368/1946/361/1954/2335/11344/6049/9856/9723/10371/6405/4131/627/5802/6792/7143/343472/10507/6557/7248/57468/5879/7474/7410/8829/23028/6585/1808/10542/4137/9990/150465/57142/4133/223117/1630/57611/85358/6560/387/57698/374946/6259/10000/55558/10505/10501/196527/23011/6558/6…	175
BP	GO:0000724	double-strand break repair via homologous recombination	159/16611	162/18800	3.36508e-06	5.98758e-05	3.99139e-05	79728/54799/158880/54617/115004/80314/26122/9985/55693/10933/472/60/54537/7454/23126/27343/64210/5885/7486/11144/6944/10524/29072/57634/5980/56893/23347/196528/6119/149840/23028/3980/7528/6421/147872/8607/51444/80010/92797/8089/64110/6118/112441434/254394/84296/9401/51659/63979/55183/4175/5890/8317/10459/10213/126074/65123/23503/2072/55135/58493/23514/2187/441161/7158/55086/4172/9643/5888/119392/…	159
BP	GO:0051592	response to calcium ion	142/16611	144/18800	3.40428e-06	6.04047e-05	4.02665e-05	8826/805/2822/241/2039/7226/3184/4205/10105/2354/4547/8904/6263/8437/553115/91683/55503/2185/29957/3208/25932/144402/140576/5311/1800/6857/817/311/6262/22871/3707/56670/7220/2696/246/7474/151835/10235/2243/127833/5122/845/10242/100271927/51760/3725/6261/3727/79085/7222/857/90019/7273/9066/148281/10016/57192/955/2978/5563/10768/6609/4331/131034/3710/7139/84258/5530/3625/30819/5336/27094/4734/1906/…	142
BP	GO:0001838	embryonic epithelial tube formation	123/16611	124/18800	3.56688e-06	6.29392e-05	4.1956e-05	115908/10395/1857/2535/5727/7408/30812/8323/9585/57619/6385/84678/23242/25/57216/8463/7798/7042/29072/6046/55081/1856/10653/836/8543/9968/6659/2668/7248/7474/151449/4522/585/54361/57167/2648/653/23654/6201/5567/6664/6692/26585/8915/131405/133/51804/1499/6662/7849/5914/4036/56963/7189/655/4976/3091/6497/2909/51098/6789/317/7475/5979/4524/5916/5898/1855/6928/80199/65979/25902/10427/11146/7289/10370…	123
BP	GO:0002688	regulation of leukocyte chemotaxis	123/16611	124/18800	3.56688e-06	6.29392e-05	4.1956e-05	3627/5919/7130/8740/23075/6504/5054/972/5880/729230/6352/646960/7422/80024/6688/2358/7060/2621/727/7424/2185/1230/9353/56833/6347/6846/3146/1803/1236/114609/3965/2277/4192/79890/4067/3071/27202/5764/4681/3576/5879/7474/100528032/5595/1436/811/57402/1240/79647/9943/3570/83700/6366/51561/22914/10059/26585/10488/6351/1435/23604/2155/196527/5228/6354/9750/6387/1906/64127/284114/284340/10850/7941/5594…	123
BP	GO:0007548	sex differentiation	270/16611	281/18800	3.61521e-06	6.36158e-05	4.2407e-05	3552/5154/7130/63950/1051/7490/174/2069/30812/1495/51665/8999/9985/7026/4846/101927581/6714/472/268/56729/6586/55636/1545/9510/6777/23411/63951/23598/7422/1399/2189/10184/11144/64220/2623/8322/409/2296/2661/7042/4090/9353/5806/7022/5087/400629/2627/317719/10371/5926/666/9825/10046/836/8751/657/1761/4323/497189/23205/4313/2697/7474/3624/3791/89766/668/5950/638/3172/8820/59338/2255/11086/54361/4609…	270
BP	GO:0071692	protein localization to extracellular region	342/16611	359/18800	3.80354e-06	6.65979e-05	4.4395e-05	3552/6288/93/54209/9607/55240/640/2822/9545/284119/5873/2039/7226/23086/91543/23607/406/26258/64285/3170/7447/3993/91355/285381/7432/4547/8111/4826/5106/6352/80024/3783/51172/6865/7424/388581/2645/8398/1311/64215/7042/376267/415116/4825/10972/3717/1946/4843/6755/5007/5481/1268/4052/57818/56670/57333/2281/10961/3458/25874/9463/51167/6833/3123/93145/2696/6717/128989/54097/6659/4681/5865/7097/7099/8…	342
BP	GO:0035264	multicellular organism growth	141/16611	143/18800	3.8056e-06	6.65979e-05	4.4395e-05	79728/1281/9518/5727/8835/25937/140606/4886/2593/472/10269/55636/51316/6777/57282/677/5324/54542/83605/114789/25932/1311/26058/80169/4880/57493/27429/6774/55224/83931/10743/3481/6506/1735/2307/57468/153/8820/59338/585/2033/55777/2844/154/2648/3202/7430/2019/51761/80010/79718/55512/8195/1435/5930/596/6887/80351/7429/2690/6712/3020/5914/5479/5454/583/5339/2693/55717/7157/6668/320/10848/351/367/1036…	141
BP	GO:0032355	response to estradiol	122/16611	123/18800	4.00949e-06	6.99738e-05	4.66453e-05	5154/445/841/1277/5727/1728/8835/842/7026/3184/1545/6777/5021/3485/10268/6869/10524/3361/6774/361/84458/847/4131/338/836/374/8932/4313/2255/4609/1027/811/4654/2852/50846/8854/84660/8202/10018/2876/6715/117/7479/2155/1499/6812/6700/5914/53615/3169/1490/655/5457/2693/2146/2021/6752/1446/6870/5458/6569/84687/10856/890/6751/3015/80139/2688/6529/952/3952/2101/8204/54658/2100/81930/6422/5111/2026/7040/…	122
BP	GO:0016050	vesicle organization	293/16611	306/18800	4.21933e-06	7.34349e-05	4.89525e-05	5322/10451/80183/6272/10981/3257/83871/11151/203062/29887/6504/5552/7306/5873/23023/6385/150368/10228/54809/51128/23607/947/6843/26258/83547/356/4935/63971/89781/9871/858/553115/7251/8676/4033/84376/29082/8673/10972/84062/9146/55300/81555/10058/9882/57403/6857/5007/9519/8301/6281/9392/286753/84364/8878/55207/6691/225689/23603/1173/6809/6490/29911/84272/25946/84286/201294/5819/8452/10802/6616/2355…	293
BP	GO:0010212	response to ionizing radiation	140/16611	142/18800	4.25381e-06	7.38332e-05	4.92181e-05	3552/3627/10413/1936/54617/11011/57103/55693/79073/57817/472/10206/10269/51776/23411/7056/6648/7486/51720/10524/1535/3735/1196/57646/1161/1026/836/121457/388/8091/85453/4609/3428/23028/85456/4255/5883/598/3265/2876/6609/596/63979/26272/9575/65123/2177/5371/11200/2002/2885/58493/23514/90381/6154/7158/1894/404672/4193/2140/7157/221927/5888/4221/9577/1432/64326/144715/11277/867/142/64710/5810/545/44…	140
BP	GO:0046942	carboxylic acid transport	268/16611	279/18800	4.29881e-06	7.44114e-05	4.96035e-05	3552/5322/56301/5320/8714/340146/10861/366/5321/624/376497/162515/1066/8564/89874/391013/116369/6850/23539/8398/26279/94081/8273/9121/9056/5999/84062/9368/6541/134/387700/2917/4843/8884/133418/222642/22925/9536/9122/23428/4923/123096/25874/5025/7223/6506/7442/84889/6567/23657/118980/1836/6533/2352/2697/6754/206358/10166/253512/4609/551/6540/11309/6539/55117/201780/8399/11230/634/10991/121260/2550…	268
BP	GO:1902905	positive regulation of supramolecular fiber organization	172/16611	176/18800	4.49444e-06	7.7587e-05	5.17204e-05	23075/84722/7408/2242/11346/4233/6683/6385/8477/6188/7454/4733/1191/51429/25/2934/29109/6869/2185/146206/9788/5345/51199/79998/55971/10142/253725/9873/253260/51466/7984/389/1236/3397/55604/6281/4926/4131/5987/9948/2041/3071/6249/1073/9475/246/7248/10979/5879/4690/23332/1902/4653/402/8829/4868/54361/1027/4204/148170/4137/382/89848/80115/6366/91807/442721/10458/54551/171024/2876/3303/10152/387/403/…	172
BP	GO:0046887	positive regulation of hormone secretion	121/16611	122/18800	4.50672e-06	7.75886e-05	5.17215e-05	3077/6696/640/2822/7226/56729/7447/8111/4826/5106/6869/388581/2645/338557/8398/4825/8673/3717/5007/25874/3123/2696/6717/6659/3624/668/5950/54795/2243/5467/6934/51714/57555/2852/286676/4089/2550/2850/114897/7200/6664/91608/51768/65985/116/2922/3670/5715/51083/5213/3625/4824/9854/2746/5532/1906/3091/2244/169026/1601/8660/114131/2641/8600/6343/11132/2692/2695/2182/5581/5781/114/952/222546/3952/8723/…	121
BP	GO:0006606	protein import into nucleus	156/16611	159/18800	4.63702e-06	7.96168e-05	5.30735e-05	54830/84268/23534/56478/55612/868/29969/6850/602/10073/284/5514/5295/5580/3717/3841/6774/3059/9818/1026/3458/51366/5903/8878/10758/9631/3837/9221/55696/55746/8692/137735/120892/55374/10762/11142/23511/1994/11331/79711/5569/79902/5530/402569/57506/11261/4928/8021/4321/727851/3838/285877/5371/57122/63928/948/6789/1894/7157/4088/84220/7545/1408/100101267/23742/5663/1432/6396/4792/400966/1434/84455/7…	156
BP	GO:0046546	development of primary male sexual characteristics	139/16611	141/18800	4.75436e-06	8.1412e-05	5.42702e-05	3552/5154/7490/30812/1495/9985/268/1545/23598/1399/10184/2623/7042/7022/400629/2627/317719/10371/5926/666/9825/10046/8751/1761/4323/2697/7474/3624/638/59338/11086/54361/8433/50846/4089/2488/598/26471/128637/8894/3148/10018/6715/596/51804/51742/3625/1636/3020/9667/7482/4824/6662/5914/4036/3972/56956/3815/56159/3622/367/642658/2175/867/378948/57647/5972/269/9289/4436/546/8747/83990/259266/4254/4521…	139
BP	GO:0030595	leukocyte chemotaxis	228/16611	236/18800	4.79165e-06	8.18306e-05	5.45492e-05	3627/5919/10451/7130/3958/8740/54210/23075/6288/4283/6373/5293/11151/6504/5054/972/1234/7226/1441/5155/5880/23765/2920/6279/3672/729230/6352/646960/7422/80024/6688/2358/7060/2621/727/2321/7424/2185/6850/3689/1230/682/7042/9353/30817/56833/6347/6846/3146/7984/1803/5196/1236/114609/3965/2277/6280/4192/6364/79890/4067/2919/3071/3269/7852/27202/5764/4681/3576/5879/7474/100528032/2207/54795/240/5595/3…	228
BP	GO:0032103	positive regulation of response to external stimulus	418/16611	442/18800	4.83444e-06	8.23406e-05	5.48892e-05	3627/5919/5322/8840/83666/115362/8740/5359/5320/23075/2152/7162/8302/3956/84166/1051/284467/54209/2069/145741/9111/115004/6504/9641/5054/972/241/3600/4233/114836/84034/9180/4258/6714/1075/7114/64332/51311/4332/718/81565/3823/5155/3430/6777/5880/23765/6279/7056/55527/729230/6352/646960/7422/1826/9450/8638/149628/3133/85363/185/4064/6688/5733/3916/3315/2358/7060/51284/2621/5734/64581/7424/2185/5545…	418
BP	GO:0006475	internal protein amino acid acetylation	171/16611	175/18800	4.98156e-06	8.46201e-05	5.64087e-05	7703/54799/57325/80314/26122/284058/8986/6877/10933/10269/60/27097/23411/84289/55167/7994/51200/6688/55209/9862/8520/56970/3054/6944/10524/4300/26038/57634/8473/23774/10865/10847/9767/57326/57673/23522/55689/3662/195814/84148/8464/6872/79969/11091/11143/117143/253175/93624/9913/5595/2033/4204/79960/4654/4137/80218/2648/8260/8607/4089/8861/6871/11315/8202/7917/9252/6873/8089/6418/4582/200186/80764…	171
BP	GO:0007596	blood coagulation	214/16611	221/18800	5.02568e-06	8.51425e-05	5.6757e-05	5154/5327/10630/1465/10451/4627/5624/5265/1281/5359/710/2152/6288/308/5329/22915/1192/170692/8323/5054/640/3690/5873/84034/4846/6714/2039/5321/2191/958/60/947/26258/3170/7454/5155/5777/83706/10627/89781/7450/7056/959/57834/646960/3315/966/2621/2192/5328/3043/6850/928/5023/2623/1311/5345/5580/84062/3717/8525/2335/5196/3818/29071/10544/4067/3848/4352/23657/151/3827/3572/725/7980/8526/6403/7410/152/…	214
BP	GO:0051101	regulation of DNA binding	120/16611	121/18800	5.06527e-06	8.55856e-05	5.70523e-05	5329/3005/805/7114/55294/10269/4318/6612/3162/8904/4188/149628/3001/117854/602/7023/2623/58499/8658/55906/2296/6672/171392/3717/3146/3397/3662/3458/124857/6872/6717/8091/117166/2033/4609/3428/23028/10542/3066/3725/1460/23462/201501/4830/9314/11315/1054/6664/64324/3148/65057/5071/177/3670/1950/55182/4760/1499/10459/7189/4317/5457/2072/6497/4803/5663/51042/5458/142/4792/23493/4751/9464/1869/8864/55…	120
BP	GO:0060349	bone morphogenesis	98/16611	98/18800	5.20948e-06	8.75577e-05	5.8367e-05	4057/1281/6424/1277/162466/860/10269/285973/60676/91355/4664/1305/871/9249/1311/56603/2296/4880/4665/1954/7048/4209/2261/134701/2263/4323/497189/3638/57560/85301/4322/1280/2734/387733/55512/55790/338773/4041/4146/8817/2690/1112/6662/5914/309/6497/2249/1749/249/642658/5916/5191/140947/8313/2132/3636/4762/3207/3037/54928/79065/10370/654/2131/659/4487/25987/658/59341/9321/51715/158326/3549/7059/54/1…	98
BP	GO:0120162	positive regulation of cold-induced thermogenesis	98/16611	98/18800	5.20948e-06	8.75577e-05	5.8367e-05	79054/3566/2171/6778/33/1051/64641/50486/9658/2827/51393/51316/5021/729230/7422/2180/6850/115209/338557/51043/5618/63976/1621/3717/8473/3060/10912/5746/3662/1734/1376/7852/2697/7840/153/43/23028/1240/154/857/51087/116/55818/7067/5565/2778/3953/8929/79602/948/3596/7350/3033/2034/249/4237/324/23175/2167/26291/6319/4849/283455/8864/3952/3934/8841/79071/133522/10400/1778/55198/3297/83401/6588/3565/56…	98
BP	GO:0007160	cell-matrix adhesion	227/16611	235/18800	5.25289e-06	8.80551e-05	5.86985e-05	3683/10395/255743/10225/9358/1281/916/56477/5054/2013/7205/6548/3690/6714/6385/2039/7007/8631/4059/967/947/83706/55612/3672/2523/10516/7422/1305/25/9480/50509/1845/87/3675/5590/5328/2185/7791/50488/3681/2932/1842/3678/3689/3679/5295/56999/54749/1946/3684/2335/1236/3695/9723/3655/182/6281/29984/2041/2042/3685/3987/8751/8516/3687/6237/3204/23603/9475/613/4323/7248/10979/5879/23332/3791/79834/57662/…	227
BP	GO:0008584	male gonad development	138/16611	140/18800	5.31329e-06	8.81397e-05	5.8755e-05	3552/5154/7490/30812/1495/9985/268/1545/23598/1399/2623/7042/7022/400629/2627/317719/10371/5926/666/9825/10046/8751/1761/4323/2697/7474/3624/638/59338/11086/54361/8433/50846/4089/2488/598/26471/128637/8894/3148/10018/6715/596/51804/51742/3625/1636/3020/9667/7482/4824/6662/5914/4036/3972/56956/3815/56159/3622/367/642658/2175/867/378948/57647/5972/269/9289/4436/546/8747/83990/259266/4254/4521/5568/…	138
BP	GO:0042157	lipoprotein metabolic process	138/16611	140/18800	5.31329e-06	8.81397e-05	5.8755e-05	84885/8542/55062/2822/55650/3690/254887/51604/472/10026/80157/4547/79844/9140/23780/11313/80833/80055/338/336/3685/10533/283576/80235/84243/79683/1509/5277/3931/25921/56270/57467/341/55625/54965/55054/242/26090/9488/51201/1622/51227/2629/22930/345/5538/5289/55937/29801/51125/9487/8813/51304/51114/335/84945/254359/10434/29881/55908/26100/9091/81575/5465/64840/23556/116519/55146/94005/345611/348/55…	138
BP	GO:0050921	positive regulation of chemotaxis	138/16611	140/18800	5.31329e-06	8.81397e-05	5.8755e-05	3627/5919/8740/23075/2152/7162/54209/6504/5054/972/4233/7114/5155/5880/729230/6352/646960/7422/1826/6688/3315/2358/7060/2621/7424/2185/1230/9353/6846/3146/1233/1954/1236/114609/3965/2277/4192/64094/56670/5025/3071/7852/6809/5764/3576/5879/7474/3791/5595/2255/8829/1436/811/57402/1240/79647/9943/3570/6366/51561/10059/4908/10488/6351/1435/177/23604/8817/2155/196527/5228/6354/9750/6387/1012/9048/6480…	138
BP	GO:0072073	kidney epithelium development	138/16611	140/18800	5.31329e-06	8.81397e-05	5.8755e-05	10413/7471/255743/8826/5175/5727/7490/30812/25937/6385/3913/947/3217/2719/7422/8842/5420/10252/9788/2296/26508/4090/650/100133941/9353/6772/1948/5311/2043/5087/4092/3237/847/182/384/4643/2263/2668/25959/2302/4868/54361/4609/9244/7477/4087/4089/3611/26585/596/9863/51804/1499/4072/7482/6662/7849/5310/5914/6092/655/55366/1739/64412/7481/7475/4088/2247/9500/65266/2045/4435/54806/1909/5979/84445/6928/…	138
BP	GO:0009755	hormone-mediated signaling pathway	185/16611	190/18800	5.45183e-06	9.0203e-05	6.01304e-05	10413/9113/6714/26524/7101/56937/406/376497/1395/23411/4848/7533/55885/2180/9604/5618/26508/9325/3717/6294/57658/6597/6049/8013/6755/2103/8611/51366/8549/149563/9063/7068/10013/25959/6754/81285/4306/5467/2033/23028/811/161582/2852/11057/1460/6257/51389/7181/196541/11315/7200/9975/3275/23376/55325/7337/387/55818/11331/3670/7067/2965/23543/2690/90226/112398/9667/4824/5914/9575/9572/3169/2908/8289/7…	185
BP	GO:0070646	protein modification by small protein removal	170/16611	174/18800	5.52077e-06	9.11069e-05	6.07329e-05	57337/25862/158880/6877/27097/57695/1540/124739/6737/9733/8975/84182/56970/51720/26054/9100/23450/7128/57646/4287/54532/9825/50813/8464/80013/51035/26168/7347/117143/93624/7874/9913/9960/84640/10868/23172/100170841/2648/10869/64708/7415/84132/219333/7375/51138/11315/78990/401447/6873/645402/5071/57663/59343/161725/645836/10213/55031/23326/10713/389856/10987/205564/85015/139562/9097/9577/3094/8419…	170
BP	GO:0006413	translational initiation	119/16611	120/18800	5.69266e-06	9.34595e-05	6.23012e-05	55024/23521/23645/1653/6188/6352/1981/83939/3315/5936/84919/51386/1975/317649/10289/64410/27161/4869/3646/8846/1965/1964/100127983/4690/6059/8872/6199/8668/6189/8661/1983/1618/1974/28985/9689/8664/2332/8894/123263/57054/5610/1939/5436/4686/255308/27335/6193/1617/1968/253314/66037/9811/220064/10987/1978/51441/8666/7884/8891/10657/57055/57135/400961/8663/54915/7458/9669/440275/8672/8892/9451/23367/…	119
BP	GO:0072655	establishment of protein localization to mitochondrion	119/16611	120/18800	5.69266e-06	9.34595e-05	6.23012e-05	84709/10134/55294/5880/89781/637/56947/4285/3308/27429/51100/79778/84134/160140/118424/387990/92609/56993/65018/7855/26517/100652748/9868/5018/120892/23409/706/4137/1459/3098/3320/51025/64112/9804/9520/27113/3329/5071/7323/8546/10055/10425/728489/83943/2931/54543/9049/51079/130916/59286/10245/26521/10452/9141/5898/100287932/10531/8314/25793/26515/26519/285521/23203/9530/3305/79568/131474/3998/104…	119
BP	GO:0055067	monovalent inorganic cation homeostasis	154/16611	157/18800	5.73878e-06	9.39744e-05	6.26444e-05	3552/10723/760/6548/6556/64699/356/57282/4302/185/6869/84561/887/2896/25932/479/482/55858/54664/56833/134/66002/476/9498/84329/6508/57835/80763/8992/6557/144811/57468/84286/3757/5595/551/23557/120892/6550/9990/6332/1585/525/65082/483/5164/51606/23545/6560/7337/6337/5538/596/285335/27035/480/11261/54982/535/1636/6558/51463/496/389015/5009/8671/1906/2771/6522/56996/1909/9497/3766/440400/6521/5594/5…	154
BP	GO:0060560	developmental growth involved in morphogenesis	226/16611	234/18800	5.75771e-06	9.40426e-05	6.26899e-05	10413/214/8826/29882/6696/3913/6586/10253/81565/4099/8482/51393/23242/1627/8904/8437/7422/1826/51265/25/79594/7224/85407/5590/10252/56924/2932/51199/9353/9576/4825/1946/1954/6857/2335/11344/6049/9856/7048/9723/10371/6405/4131/627/5802/6792/7143/374/9968/7852/343472/2263/10507/10013/7474/151835/51299/127833/2255/8829/6585/1808/4137/51760/66000/7477/2016/150465/57142/3320/4133/223117/3688/55897/163…	226
BP	GO:0015850	organic hydroxy compound transport	239/16611	248/18800	5.82467e-06	9.48929e-05	6.32567e-05	23461/8714/6696/9607/4481/3690/140606/366/60/7432/4547/5021/358/1191/1066/154664/114884/185/91683/3990/10577/114880/6850/1137/23539/5023/10859/64220/10351/8273/84062/114876/54762/3737/6857/5007/133418/222642/1268/338/336/55207/225689/20/9311/65018/151/3931/2668/5865/26119/152/5950/6580/127833/6570/4986/4609/10802/64241/89872/341/706/23762/114883/51760/11309/201780/1582/634/857/2550/4790/159963/90…	239
BP	GO:0044242	cellular lipid catabolic process	212/16611	219/18800	6.06565e-06	9.83159e-05	6.55385e-05	8228/5322/55268/151056/33/10449/2822/196463/64900/10908/4258/5321/79887/1545/145447/5106/84129/32/4758/11343/3074/129807/3990/133121/150379/8398/27349/56603/284161/5580/11313/22876/340665/3030/2517/56898/1268/338/336/2581/1376/8309/1962/56624/79153/427/160428/5467/219970/23659/54363/1592/100137049/55627/341/1375/11057/5096/8399/549/313/10478/10825/54905/53630/11001/747/26063/26090/2760/55512/6609…	212
BP	GO:0051651	maintenance of location in cell	212/16611	219/18800	6.06565e-06	9.83159e-05	6.55385e-05	3627/4283/6373/11151/930/805/5552/287/56704/7114/1234/7226/55636/356/79041/5777/1627/10523/6263/6279/10956/80024/25/2934/8989/2185/55283/10945/25792/7184/5031/6672/23515/2829/10142/11015/920/5311/187/11344/1236/57190/1535/817/11079/6262/5350/6280/4923/7220/4067/2281/11014/7442/6717/65018/9001/7781/3357/7780/9913/402/53373/2814/845/585/9168/844/811/2280/286527/64083/3638/706/2852/54923/51490/6261/…	212
BP	GO:0002822	regulation of adaptive immune response based on somatic recombination of immune receptors built from immunoglobulin superfamily domains	169/16611	173/18800	6.11756e-06	9.84061e-05	6.55987e-05	51111/259307/3566/6778/3077/54209/941/3122/6504/2213/246778/64332/5321/196/6556/84695/91543/958/718/54537/7454/3718/5777/3140/8741/729230/3575/11035/3133/5590/64581/54542/1604/10859/7133/51043/22890/7468/149041/3142/920/8809/3146/23529/4092/10865/7128/9173/114548/79915/695/3821/4292/8767/3071/3123/51010/7037/7855/725/81545/567/10673/54795/55061/2302/5819/7784/149840/3593/84868/634/121260/100/5156…	169
BP	GO:0018393	internal peptidyl-lysine acetylation	169/16611	173/18800	6.11756e-06	9.84061e-05	6.55987e-05	7703/54799/57325/80314/26122/284058/8986/6877/10933/10269/60/27097/23411/84289/55167/7994/51200/6688/55209/9862/8520/56970/3054/6944/10524/4300/26038/57634/8473/23774/10865/10847/9767/57326/57673/23522/55689/3662/195814/84148/8464/6872/79969/11091/11143/117143/253175/93624/9913/5595/2033/4204/79960/4654/80218/2648/8607/4089/8861/6871/11315/8202/7917/9252/6873/8089/6418/4582/200186/80764/3670/5110…	169
BP	GO:0051650	establishment of vesicle localization	169/16611	173/18800	6.11756e-06	9.84061e-05	6.55987e-05	129880/55062/5873/79443/6385/51128/5871/26258/81565/4935/63971/79083/553115/7251/4542/29058/5590/4033/64005/4641/55773/10972/84062/9146/4645/8301/1176/22871/22906/84364/3458/10749/4643/225689/84984/65018/9001/10652/23332/585/8452/23557/64284/120892/388552/4430/26985/3800/51168/66008/89866/8825/10540/64149/3798/254263/4133/10125/55088/10016/1780/55512/547/4640/9342/80208/5071/8195/4647/4648/118426…	169
BP	GO:0007605	sensory perception of sound	153/16611	156/18800	6.38313e-06	0.000102162	6.81025e-05	150677/1277/55584/51473/7007/55636/10253/64699/80204/4919/93035/7466/3074/5077/8312/339768/3198/8322/55084/3249/9368/2917/349149/53942/80055/54532/9948/1032/79955/836/22953/5269/24139/64072/7068/1301/26517/501/153562/65217/1027/53405/645104/9381/7401/51168/491/525/56751/1280/3753/2876/4640/89797/8195/6907/4647/4648/25861/8556/4646/9750/643226/4036/6169/117531/7399/494513/3815/140469/389207/5458/7…	153
BP	GO:0051168	nuclear export	153/16611	156/18800	6.38313e-06	0.000102162	6.81025e-05	54830/3178/10023/56478/3429/8106/84271/5784/2621/2932/6672/26019/29072/54890/6428/4869/9631/57510/3181/7248/26993/6059/55696/84324/23049/51496/55746/6934/84934/161424/811/7919/55421/2810/92335/3267/23039/26097/11315/55781/65083/23511/11097/23214/10768/23293/10482/6830/79902/4686/23212/11261/8021/55437/643136/202151/57187/5310/8536/51068/285877/54888/3313/56001/7514/57122/29118/51808/11260/10212/1…	153
BP	GO:1990138	neuron projection extension	168/16611	172/18800	6.77798e-06	0.00010821	7.21339e-05	214/8826/29882/3913/6586/81565/4099/8482/51393/1627/8904/8437/7422/1826/51265/25/79594/7224/5590/56924/2932/9353/9576/4825/1954/6857/2335/11344/6049/9856/9723/10371/6405/4131/5802/6792/7143/7852/343472/10507/7474/151835/51299/127833/8829/6585/1808/4137/51760/66000/2016/150465/57142/3320/4133/223117/3688/57611/50618/80208/9201/5071/57698/374946/6259/84258/55558/10505/10501/1499/23011/6387/91584/12…	168
BP	GO:0002274	myeloid leukocyte activation	224/16611	232/18800	6.91456e-06	0.000110114	7.34035e-05	3566/5359/5320/5293/284467/54209/914/2242/9111/6504/5971/972/640/3600/2213/5724/1075/57817/3696/472/5321/6556/5730/2268/5777/3430/5880/3162/712/4055/729230/1191/6352/10538/116071/3937/55904/6688/2358/1776/6850/3689/2623/2896/284021/7096/4615/5580/8673/30817/3717/3146/3684/2335/3598/8013/11027/7048/3735/3965/4852/11314/9173/64784/1268/695/56670/2294/4067/136/3662/3458/7442/10758/7462/820/22918/399…	224
BP	GO:0002831	regulation of response to biotic stimulus	334/16611	351/18800	7.09371e-06	0.000112405	7.49307e-05	4057/259307/4938/5322/83666/115362/10225/841/5359/60489/710/8302/84166/54209/2069/9111/115004/26191/9641/805/3659/57103/23170/3600/2213/114836/114769/84034/100507436/246778/6714/51311/4940/4332/196/10269/54765/4795/2268/8651/3823/5777/3430/84282/6777/3140/10875/11221/54625/200316/6352/9450/8638/79594/149628/3133/85363/4064/6688/6737/3916/79844/2358/5272/64581/6850/117854/58509/1604/9140/3075/1085…	334
BP	GO:0035592	establishment of protein localization to extracellular region	334/16611	351/18800	7.09371e-06	0.000112405	7.49307e-05	3552/6288/93/54209/9607/55240/640/2822/9545/284119/5873/2039/7226/23086/91543/23607/406/26258/64285/3170/7447/3993/91355/285381/7432/4547/8111/4826/5106/6352/80024/3783/51172/6865/7424/388581/2645/8398/1311/64215/7042/376267/415116/4825/10972/3717/1946/4843/6755/5007/5481/1268/57818/56670/57333/2281/10961/3458/25874/9463/51167/6833/3123/93145/2696/6717/128989/54097/6659/5865/7097/7099/81285/5950/…	334
BP	GO:0071478	cellular response to radiation	182/16611	187/18800	7.34281e-06	0.000116064	7.73694e-05	7076/10413/1936/54617/11011/842/55693/114769/79073/57817/472/10269/51776/3000/4318/23411/79823/23746/358/150678/7486/22890/6247/5295/4314/5580/5603/23596/1535/5481/57646/1026/4776/1643/4869/10715/6872/388/8091/1965/5429/4313/56160/85453/2033/4308/4609/8692/3428/79913/23028/7528/4157/167153/123041/85456/6010/4255/7508/5883/598/2332/3265/6609/9293/208/9683/63979/26272/9575/84236/55031/163859/11200/…	182
BP	GO:0007586	digestion	135/16611	137/18800	7.41171e-06	0.000116863	7.79021e-05	362/1890/51302/29887/57817/12/80168/5021/358/3783/5733/6869/170302/887/3274/388743/5646/4588/8544/9026/4192/336/7442/7421/56624/497189/10753/7099/5950/1131/3658/2255/4986/64241/7430/7031/1582/389383/387129/3605/5222/7429/4760/90226/6662/340204/6476/389015/10062/56667/335/9245/2693/948/6779/29881/64127/11171/114131/48/65266/5644/6446/6343/116519/6584/1056/140947/65125/340547/27347/643834/27159/522…	135
BP	GO:0014033	neural crest cell differentiation	95/16611	95/18800	7.56767e-06	0.000119027	7.9345e-05	30812/5308/2487/8482/553115/2296/2335/9723/1947/340665/182/10371/6405/90/4902/23603/10507/657/2668/9221/3357/5595/8092/8829/8854/4089/223117/10016/6664/9965/3670/3084/64839/4040/8929/10505/10501/6662/55698/309/655/1906/3091/2637/1000/8828/84541/1909/5979/5594/2066/55593/9464/4254/65979/83989/6949/6469/1910/9037/10370/3911/10512/6591/2131/6422/59349/145258/56920/1908/10500/3280/7478/80326/2303/689…	95
BP	GO:0009306	protein secretion	333/16611	350/18800	7.66371e-06	0.000120241	8.01541e-05	3552/6288/93/54209/9607/55240/640/2822/9545/284119/5873/2039/7226/23086/91543/23607/406/26258/64285/3170/7447/3993/91355/285381/7432/4547/8111/4826/5106/6352/80024/3783/51172/6865/7424/388581/2645/8398/1311/64215/7042/376267/415116/4825/10972/3717/1946/4843/6755/5007/5481/1268/57818/56670/57333/2281/10961/3458/25874/9463/51167/6833/3123/93145/2696/6717/128989/54097/6659/5865/7097/7099/81285/5950/…	333
BP	GO:0006091	generation of precursor metabolites and energy	465/16611	494/18800	7.86004e-06	0.000123018	8.20055e-05	80183/4199/8974/205/7262/57103/7306/5509/195827/4190/127/10105/2997/80219/648791/637/8560/64080/9365/55526/1346/9759/2539/7360/2819/6648/4835/387712/314/8987/9249/2645/2203/8659/2932/114789/4688/63976/112464/5162/51422/8630/5255/5836/4723/23596/6774/8473/246269/5167/83931/8801/4843/6391/8013/1535/847/4695/7167/1534/217/4776/1355/3458/51167/8445/3481/7386/2230/5860/2696/5500/5507/2673/8802/65018/7…	465
BP	GO:0043484	regulation of RNA splicing	151/16611	154/18800	7.89417e-06	0.00012325	8.21596e-05	27316/3178/221662/6431/7072/113146/10150/55796/8241/4857/5936/10137/2926/57060/5295/4116/10921/7009/10262/6207/1196/10181/146713/6428/58517/6651/3181/3191/8227/494115/3188/55696/9513/389677/1859/10656/29896/4654/84872/10179/286676/54033/54845/202559/22827/9584/5978/2332/23076/51755/54407/80004/6434/57018/3303/23543/4686/11338/6733/4928/8087/57703/6231/9991/5935/4691/57716/387597/55234/56853/6426/…	151
BP	GO:0006473	protein acetylation	209/16611	216/18800	8.03402e-06	0.000124821	8.32073e-05	7703/54799/57325/80314/26122/284058/8986/6877/10933/10269/60/60560/406/27097/23411/84289/55167/23181/7994/51200/6688/55209/9862/8520/2932/56970/3054/6944/10524/4300/26038/57634/8473/23774/10865/10847/9767/57326/57673/23522/55689/3662/2308/195814/84148/8464/6872/80018/79969/11091/11143/6659/117143/253175/93624/51126/9913/5595/2033/55226/4204/79960/3066/4654/4137/80218/2648/8260/85459/8607/4089/886…	209
BP	GO:0030258	lipid modification	209/16611	216/18800	8.03402e-06	0.000124821	8.32073e-05	55268/33/10449/1571/127/3635/8776/84129/32/185/2053/27349/27124/79948/51422/8525/22876/8013/3030/56898/1268/8612/8611/336/1376/8309/1962/20/246/3931/130367/8526/54886/8897/8821/160428/240/5467/54363/64781/51179/341/23409/1375/196051/549/10478/79143/247/242/11001/285440/26063/8708/2629/10005/66036/54893/5264/208/56848/154141/9896/1606/134429/54545/55289/4534/9108/254013/55529/6662/10994/127550/887…	209
BP	GO:0030308	negative regulation of cell growth	181/16611	186/18800	8.10679e-06	0.000125645	8.37567e-05	57805/684/84722/29946/6696/7490/5931/2487/6586/4099/8482/23411/2539/51265/79594/2203/6494/7042/221476/9353/5999/5167/6597/6049/9856/9723/10371/6405/1026/5802/1032/8751/7143/10399/10507/2023/2697/7474/3624/9868/5467/3172/8829/8692/1027/6585/29948/79960/7528/55840/57142/4089/56981/4133/223117/1630/978/26585/3303/5795/5538/54825/596/374946/6259/84260/55558/56848/1031/10505/10501/604/5371/2931/9792/9…	181
BP	GO:0072331	signal transduction by p53 class mediator	166/16611	170/18800	8.31714e-06	0.000128409	8.55988e-05	1263/972/51246/79073/472/624/10269/23411/7994/10538/8444/149628/133383/4839/602/27330/7023/161742/10524/6672/6167/26038/9100/51616/22925/666/80279/57646/79915/1026/7159/8445/6872/6659/4291/10514/25946/7874/1859/56950/50484/2033/4609/3428/1027/5366/23028/9891/200734/6201/55702/51065/83787/151126/5164/26471/7917/4582/5071/3090/596/147746/29965/6135/23212/64065/5608/54541/4646/27063/5371/11200/51499…	166
BP	GO:0007188	adenylate cyclase-modulating G protein-coupled receptor signaling pathway	235/16611	244/18800	8.32541e-06	0.000128409	8.55988e-05	3627/196883/80045/976/4283/6373/4887/4886/8477/84873/2357/2827/9630/1395/7432/23284/1903/7434/10268/5733/2358/5734/23432/10203/2830/30817/3361/9368/22859/134/5196/2917/23266/8484/64784/2780/1268/5732/5350/5746/2769/7433/136/1325/2913/9590/8549/2696/797/576/151/2847/1232/2015/152/6754/1902/1131/153/2828/4986/2899/4988/5745/118442/165140/283383/2849/9568/2852/4157/154/5064/796/27201/2782/170589/577…	235
BP	GO:0002690	positive regulation of leukocyte chemotaxis	94/16611	94/18800	8.57061e-06	0.000131554	8.76952e-05	3627/5919/8740/23075/6504/5054/972/5880/729230/6352/646960/7422/6688/2358/7060/2621/7424/2185/1230/6846/3146/1236/114609/3965/2277/4192/3071/5764/3576/5879/7474/5595/1436/811/57402/1240/79647/9943/3570/6366/51561/10059/10488/6351/1435/23604/2155/196527/5228/6354/9750/6387/1906/284114/284340/10850/7941/5594/6348/65125/27347/102/51157/6346/3592/6278/90550/59341/6868/7423/3929/245937/10563/1908/6363…	94
BP	GO:0045739	positive regulation of DNA repair	94/16611	94/18800	8.57061e-06	0.000131554	8.76952e-05	51111/83666/54799/80314/26122/57103/55693/10933/60/6188/54537/7454/23126/23411/64210/2139/51720/6944/5582/10524/57634/3146/23347/55719/196528/2255/149840/150275/151636/4255/8607/1054/8089/23201/112441434/84787/55183/10459/55135/23514/2187/441161/2140/9643/9577/142/64769/10856/7515/86/3014/9025/5932/7336/79184/2305/5111/55257/8914/10635/54929/51149/10039/56907/6419/1956/165918/2074/154288/29086/54…	94
BP	GO:0048754	branching morphogenesis of an epithelial tube	150/16611	153/18800	8.77736e-06	0.000134403	8.95948e-05	10413/7471/255743/5727/7490/1969/30812/4233/6714/9231/10253/3217/2719/91355/23129/7422/25/10252/1522/25932/650/9353/64399/5311/5087/7048/3237/9723/340419/4192/2294/4776/90/7075/374/7421/2263/2668/4323/7474/3791/151449/2255/8829/54361/4609/3202/2736/4089/54567/3611/6926/80004/26585/1435/11331/596/4041/51804/1950/1499/7482/4824/6662/7849/5310/3169/5371/655/1906/55366/1739/64412/1605/6789/2637/7475/…	150
BP	GO:1901800	positive regulation of proteasomal protein catabolic process	115/16611	116/18800	9.0754e-06	0.000138634	9.24149e-05	54209/1263/10134/55294/6613/1454/1191/160418/5701/8312/5704/9604/8975/2932/51343/127544/5347/10221/4092/11337/4287/26259/6872/10399/255488/55743/153769/91445/5706/120892/26263/91304/1050/857/7415/90637/26471/29979/2332/7917/3303/5071/2629/51136/23640/131377/10425/2931/4780/57761/122809/344558/4193/1601/79699/85409/5663/64326/1453/9992/8078/9978/285671/79016/51667/1452/1855/9655/57630/5702/5988/95…	115
BP	GO:1901617	organic hydroxy compound biosynthetic process	234/16611	243/18800	9.09974e-06	0.000138673	9.2441e-05	26002/10449/51302/2643/7306/5724/3613/27122/80271/23411/9365/2539/5106/1066/5409/2185/114880/51706/8720/5031/2224/7042/650/23541/51422/1621/114876/23596/64137/5007/4923/3707/338/51744/217/7220/340895/3458/51700/120227/3269/23657/5860/1610/20/246/56624/6490/427/3612/27120/5092/7474/51360/51477/54361/5745/3638/114883/2852/4157/653/1585/283871/1582/79947/10682/4790/247/11315/5978/11001/10858/2264/89…	234
BP	GO:0021543	pallium development	165/16611	169/18800	9.21138e-06	0.000140039	9.33518e-05	63950/1281/56949/7101/26258/81565/1399/79648/2618/170302/2932/3736/6091/26468/63827/9353/8320/10579/3361/55695/10716/3912/4852/4192/84623/836/23224/89839/79969/7248/4967/429/388677/585/306/93986/4747/23028/653464/66000/1459/2016/167153/114327/57142/1021/3362/79143/23380/2018/55079/6513/54407/1746/63974/6715/6434/387/8195/6867/7804/10642/153241/55558/3400/4760/10501/1499/100996763/238/5914/1745/16…	165
BP	GO:0110053	regulation of actin filament organization	259/16611	270/18800	9.30532e-06	0.000141131	9.40793e-05	10395/23075/9113/11151/7408/11346/6548/54942/4233/6385/7114/2039/8477/93663/7454/90668/822/1627/51429/25/2934/29109/6869/54961/5734/84952/2185/146206/9788/5345/5295/57175/55971/9353/5999/5580/253725/9873/91663/253260/830/832/79822/51466/7984/11344/389/1236/3397/55604/3059/6281/2059/9026/343578/5987/9948/2041/9463/3071/163782/1073/9475/246/64857/7248/10979/5879/4690/54434/6840/23332/7840/1902/829/…	259
BP	GO:0072659	protein localization to plasma membrane	271/16611	283/18800	9.54779e-06	0.000144122	9.60733e-05	6769/3958/7162/83871/51225/5727/54209/1969/256764/2013/10791/9545/23759/287/254887/64114/23167/131578/8631/60/2633/63971/5583/10268/10211/3675/65267/5590/2621/30844/7132/30846/682/5295/23433/376267/27237/8673/91663/9368/196383/9053/54997/8301/11079/6281/29993/23136/2042/286753/3458/283576/8878/2319/23114/2181/10399/1173/9475/5911/6809/4323/57120/25921/5865/26119/55022/30818/378884/10133/84106/590…	271
BP	GO:1902105	regulation of leukocyte differentiation	271/16611	283/18800	9.54779e-06	0.000144122	9.60733e-05	4057/259307/84524/7130/3566/10288/841/1051/54209/914/2242/941/3122/9607/3659/972/3600/2213/246778/64332/861/55365/5896/55294/84695/22806/8651/6988/3718/128506/5777/6777/10875/11221/1960/8111/3635/729230/3575/1493/25/677/5590/2621/11025/6932/864/6850/54542/9308/10859/10385/51043/1230/22890/56603/7704/5295/84433/1209/149041/3142/171392/920/56833/257101/10221/8737/3146/3665/4092/54997/5196/6935/2324…	271
BP	GO:0001503	ossification	397/16611	420/18800	9.85766e-06	0.000148448	9.89568e-05	4057/27316/8840/10413/23601/7130/115908/255743/6272/93/1277/162466/1192/1051/6696/5727/23020/1969/30812/3199/25937/29887/2274/22943/5552/2822/79697/3488/54829/861/860/10269/25842/2268/8482/1290/4318/2719/91355/285313/9365/4664/1305/4015/4330/5701/64093/26578/6869/55589/58476/5734/9249/7424/6096/2185/10492/864/338557/1462/2932/9562/10140/83999/2623/1230/1311/2296/27152/7704/7042/4090/650/4880/5087…	397
BP	GO:0008154	actin polymerization or depolymerization	193/16611	199/18800	9.98938e-06	0.000150076	0.000100043	23075/9113/11151/7408/54942/7114/2039/93663/7454/822/23242/1627/51429/25/2934/51019/54961/2185/146206/55971/9353/5580/253725/9051/9873/91663/253260/3717/830/832/79822/51466/11344/1236/55604/79778/3059/9050/2059/9026/343578/9948/3071/163782/1073/246/64857/5879/4690/54434/6840/51734/829/585/4868/9168/56203/286527/148170/1730/382/375189/89848/10677/11013/80115/6366/442721/10565/10458/29766/57553/101…	193
BP	GO:0045580	regulation of T cell differentiation	148/16611	151/18800	1.08472e-05	0.000161855	0.000107894	259307/84524/3566/10288/914/941/3122/3659/972/3600/246778/64332/861/5896/84695/8651/3718/6777/10875/11221/1960/729230/3575/1493/25/5590/6932/864/6850/54542/9308/10385/51043/22890/56603/7704/84433/1209/149041/3142/257101/3146/4092/6935/23240/7048/3965/9840/64115/114548/4192/7535/639/3707/3662/3458/8767/8808/3071/3123/942/6659/8876/399/146850/7494/2302/3559/8744/3574/3593/2648/2064/2736/11005/79576…	148
BP	GO:1902850	microtubule cytoskeleton organization involved in mitosis	148/16611	151/18800	1.08472e-05	0.000161855	0.000107894	84722/6683/10253/81565/79598/4733/80258/79648/10252/29082/8658/79998/5347/29072/79884/10579/4926/54908/51203/126353/49856/10783/57405/8243/3837/55125/152185/2697/23332/3796/2255/7272/4204/23172/7756/79643/91782/114327/10540/7415/90990/3688/10735/10274/56647/1062/2770/1213/3303/387/6867/3925/54627/51115/1639/51119/5310/23116/11200/128866/1104/3833/7283/162282/26065/25777/29899/26073/2801/51652/285…	148
BP	GO:0030323	respiratory tube development	178/16611	183/18800	1.09004e-05	0.000161855	0.000107894	1116/5154/10630/10413/1281/93/84525/6431/4781/3488/4846/55294/84695/9231/10253/2719/55211/54206/7422/4015/3675/10252/1522/54542/64220/64399/57493/83931/7534/7048/2627/340419/2294/57333/26257/51668/23657/147372/2263/657/7068/4323/2735/7474/3791/5950/2252/429/5595/2302/2255/2033/5251/5125/3202/7477/4087/5604/2736/8854/1050/26154/3290/100/6664/7917/55512/80004/9509/7067/123872/8817/8546/6670/1499/16…	178
BP	GO:0043405	regulation of MAP kinase activity	178/16611	183/18800	1.09004e-05	0.000161855	0.000107894	5154/1857/26191/22943/6714/81848/5871/958/6188/54900/10253/5155/5777/11221/11235/7422/10636/7251/8312/2321/2185/10252/6850/8322/6091/650/100133941/5580/171392/84062/10221/2043/9146/11211/7984/11314/80279/1856/4067/10961/7855/146850/3357/7474/5770/7099/8692/120892/54923/2064/84962/857/245928/23533/10125/11213/10333/9479/3265/5609/10114/51755/64853/152559/4908/4216/6609/2629/3654/5795/177/27250/101…	178
BP	GO:0099504	synaptic vesicle cycle	178/16611	183/18800	1.09004e-05	0.000161855	0.000107894	4983/60/26258/154664/79953/8676/91683/2932/5023/5582/6455/84062/6857/8301/23621/5533/9498/1268/63908/29993/22871/136/5575/1173/6809/6853/5865/1142/10675/9783/9829/127833/6570/5906/6616/23557/6855/115677/57555/120892/9381/284697/9581/9024/134957/273/382/5579/10497/2054/57030/1488/90019/9066/148/56850/112476/2332/8448/8927/50618/11069/27253/116443/9342/22930/6623/11037/84961/8546/1499/6812/10755/89…	178
BP	GO:0071375	cellular response to peptide hormone stimulus	281/16611	294/18800	1.13581e-05	0.000168258	0.000112163	5327/5919/7471/445/6778/9518/8835/2822/760/6548/64900/6714/84709/6464/81565/1545/8651/376497/3718/1395/6777/23411/9365/54328/5106/54206/815/858/677/185/5590/388581/2645/2203/2932/4641/132864/51043/9021/57085/5295/55971/23433/376267/6599/4825/5580/6772/3717/6774/8473/9882/493829/5167/1583/8013/1535/3645/4131/1176/4067/286753/8412/2308/3481/9475/27019/4690/7494/5770/55022/89766/5313/4609/7532/896/3…	281
BP	GO:0090630	activation of GTPase activity	113/16611	114/18800	1.14539e-05	0.000169284	0.000112847	9411/1969/8477/29/141/81565/23216/23526/128272/1399/2185/6494/27237/9882/7984/1236/2041/23102/23603/613/7248/253959/7474/27352/84253/2302/146923/64786/57568/79774/8394/26230/102723859/93627/83874/6366/101060351/10125/4908/101060376/11138/25791/5923/208/79735/9905/729877/85440/5909/374403/57533/54662/23094/1894/84144/125058/102724862/101060321/9639/9910/5905/7813/55920/254272/101060389/129049/2315…	113
BP	GO:0003007	heart morphogenesis	244/16611	254/18800	1.15474e-05	0.000170271	0.000113505	51384/10413/129880/10395/2535/5727/4887/2274/22943/5308/4846/4886/10269/6586/55636/9510/23129/7422/1289/1399/8701/9249/57216/10252/2702/6091/2296/8463/26508/53834/7468/7042/650/9353/57493/5311/187/4092/1954/55081/7048/2627/182/6262/1856/3491/2294/90/8751/4625/2263/6659/657/51676/1301/2697/3357/7474/196528/5950/1482/585/8829/5292/2280/3725/653/6261/23768/23462/8854/57142/7134/4089/10637/54567/1942…	244
BP	GO:0015698	inorganic anion transport	177/16611	182/18800	1.20277e-05	0.000176943	0.000117953	54102/8542/6424/1192/1051/8714/10723/9022/10861/760/5724/6556/1187/55867/57282/338440/266675/116369/84561/50636/5349/25932/5031/2564/10316/5167/8884/9498/6508/57835/2554/1188/83959/64116/7416/6557/1836/57468/84975/6528/1179/253512/150160/2566/53405/706/9990/2557/2565/5250/57030/56923/5593/85320/28962/57101/6560/7439/9016/54020/26266/10057/196527/6558/51463/1244/8671/10786/22802/8001/2743/8402/652…	177
BP	GO:0007584	response to nutrient	147/16611	150/18800	1.20563e-05	0.000176955	0.00011796	10631/3552/3627/445/2730/1277/6696/1728/2242/56477/3600/57817/3170/1545/3162/9365/4330/6648/3485/2621/2180/56603/4982/6772/8473/7048/847/1268/4131/594/2281/1032/28960/2696/7421/7037/8942/25959/7494/5313/429/5467/1592/5292/64241/178/706/5251/8854/4255/2/5164/7392/4049/2876/1603/7706/2155/5914/27158/1543/2056/411/5009/655/4023/64127/2771/317/3141/249/6569/6915/4524/5741/8648/6546/1030/9388/83990/23…	147
BP	GO:1903037	regulation of leukocyte cell-cell adhesion	327/16611	344/18800	1.2149e-05	0.000177907	0.000118595	259307/3552/84524/3566/10288/445/3958/8740/916/79679/3956/3077/1051/921/11151/923/3127/941/3122/26191/56477/6504/55423/3659/972/8764/3600/2213/5724/6714/6385/64332/861/3118/5896/8631/84695/9231/6188/54900/8651/3718/5777/6777/5074/10875/11221/64926/1960/10326/868/959/729230/6352/3575/1493/140885/3133/3485/1845/5590/3119/23308/3115/864/6850/54542/9308/1604/26279/10859/9435/3689/10385/10457/51043/22…	327
BP	GO:0016236	macroautophagy	292/16611	306/18800	1.22314e-05	0.000178702	0.000119125	440738/10919/80183/84557/5899/55062/83452/57535/57103/79443/6714/141/10206/285973/26086/23411/3162/6048/81671/3920/7251/643246/8987/58476/11178/3964/9140/29082/5768/8673/529/9146/823/27429/56893/11337/11345/51100/64422/60592/10533/8767/836/8878/10715/55207/8992/65018/533/7416/10013/7248/8897/254122/291/56270/3791/23049/5595/10133/162427/23274/23557/120892/57724/9637/6829/154/79643/91782/525/65082…	292
BP	GO:0045017	glycerolipid biosynthetic process	243/16611	253/18800	1.25901e-05	0.000183522	0.000122338	5154/2171/5359/5293/56994/8835/1040/2822/55650/64900/23167/8395/51604/3613/472/5321/10026/80157/55294/718/8651/376497/84803/5155/80168/80271/55326/150763/3635/54675/8776/5106/1154/25979/23399/2180/126969/8398/9021/27124/5295/55300/55224/8525/22876/392636/80055/3707/336/79575/2181/80235/5297/246/5277/10380/3612/3931/8526/146850/3357/8897/8821/57605/23049/23659/3631/150094/10555/255919/54965/8394/8…	243
BP	GO:0001824	blastocyst development	112/16611	113/18800	1.28662e-05	0.000186267	0.000124168	10413/79728/9113/84525/10443/56949/285855/81565/4848/154197/5704/26469/8320/10161/4695/80312/54663/84871/7004/84295/57820/23168/8452/7784/166863/57167/398/51639/53918/5460/196051/57142/728661/9314/2551/705/100/84660/123920/79718/57677/1603/9412/64168/10361/84296/6830/824/402569/130399/6670/51119/5890/201895/10436/23019/50861/284723/1999/1111/9837/675/4751/121599/86/6928/642623/2116/129685/4849/64…	112
BP	GO:0018958	phenol-containing compound metabolic process	112/16611	113/18800	1.28662e-05	0.000186267	0.000124168	26002/2184/2643/7306/1571/2903/5153/10404/9365/5409/2304/314/3689/7042/1621/3249/23596/3684/3251/1733/4852/1508/217/7220/1734/9627/6567/23657/1610/1735/51301/90527/6490/7474/6528/6799/4157/11315/6715/5071/1513/55737/596/340595/4061/53919/3350/7849/10755/9839/1312/5053/538/6870/7173/405753/1497/7166/4435/2034/1909/51151/285671/9693/434/9464/220074/445329/6822/1652/136319/117247/4881/121278/1814/10…	112
BP	GO:0031623	receptor internalization	112/16611	113/18800	1.28662e-05	0.000186267	0.000124168	4983/6424/22943/3690/967/7422/59283/124930/10268/10211/55788/6850/928/10203/6900/10859/3689/284/3208/409/84062/4043/1948/50632/8301/79890/23237/9463/1173/7037/3576/3357/26119/2207/3579/100506013/6616/43/7430/634/857/3688/375/2332/4908/26585/1213/133/9863/84896/1950/26045/5336/88455/57007/4289/4734/6642/2885/948/54550/8898/338692/54806/407/347730/5868/146395/157/2966/1814/10266/6311/2890/1742/2605…	112
BP	GO:0006338	chromatin remodeling	255/16611	266/18800	1.30653e-05	0.000188721	0.000125803	3005/54617/5931/55693/23030/54891/60/25842/55636/11177/8345/9759/7994/27443/8347/9733/121504/23234/55193/257218/57459/4778/3054/6944/22890/8208/11164/6599/11198/4300/29072/26038/6304/3070/6046/6597/10847/1106/150572/8019/23522/55689/8290/6602/8353/4869/152485/6594/8932/84181/440689/93624/196528/85453/7259/4609/8242/79913/7528/3066/8339/23314/9682/2648/387103/8359/8607/56916/6749/29915/6871/29994/…	255
BP	GO:0042594	response to starvation	190/16611	196/18800	1.33025e-05	0.00019128	0.00012751	440738/10919/51520/84557/5899/3178/3077/55062/57535/9607/55630/57817/10325/7538/8131/23411/5106/79726/3920/83939/389493/643246/2621/7486/84219/81788/51422/154743/7378/11337/11345/51100/3060/1026/10533/220441/9463/2308/168620/27327/1965/8897/53632/7494/10514/56270/9681/5595/54361/3428/23274/5366/150094/120892/4654/26263/9024/64121/9891/58528/10991/440/3607/27244/3171/6513/467/8735/5563/54407/6715/…	190
BP	GO:0043393	regulation of protein binding	190/16611	196/18800	1.33025e-05	0.00019128	0.00012751	115908/5899/3077/84525/7262/22943/640/114769/6714/60/5155/4318/1454/23129/1400/868/9759/4015/25/6737/10211/25979/489/1522/2932/143941/284/409/650/5347/5580/84062/4043/79139/3397/7009/5516/9026/1026/627/4776/8767/124857/8751/6872/10399/117166/567/7474/4931/26119/5595/6934/2033/8829/23557/23028/64400/120892/2280/151636/154/6996/81494/857/3416/26206/4133/7448/11315/4140/23641/5071/6135/10014/1636/34…	190
BP	GO:0060271	cilium assembly	337/16611	355/18800	1.35023e-05	0.000193715	0.000129132	54970/92749/10413/129880/79874/200162/25937/29887/127733/339145/79864/348807/23157/51473/80210/25876/285331/257236/4117/84229/83547/79598/6674/1540/80216/136332/2934/9480/51314/55172/161502/10096/57216/30844/164781/220136/2932/83659/286464/80127/143941/30846/89765/27152/9576/22897/80184/84062/64518/9662/196383/1641/55081/64422/79140/84223/8814/282809/79582/85478/117178/8655/25981/255101/387885/67…	337
BP	GO:0031098	stress-activated protein kinase signaling cascade	242/16611	252/18800	1.37249e-05	0.000196466	0.000130967	3552/51384/54209/26191/6504/2213/10269/5871/7538/3476/51776/11221/285613/1540/11235/4055/259/7422/140885/29969/677/1399/6688/1845/8312/51284/5734/64581/2185/2218/50488/83605/3489/5345/7042/23239/4615/650/171392/5603/10221/8737/3146/2898/1236/114609/3965/10371/10912/11184/388325/128853/2047/4067/22881/136/8767/2308/51135/5911/65018/11143/7185/7474/153769/7099/54986/11342/5595/4671/4986/4868/90441/…	242
BP	GO:0046031	ADP metabolic process	90/16611	90/18800	1.40987e-05	0.000201365	0.000134232	205/57103/195827/55526/9759/2819/387712/2645/2203/26289/51422/6774/8473/4907/7167/3458/2023/53632/4967/5313/402/2033/4609/51085/3098/3607/26471/2027/26137/5563/5315/221937/441531/669/204/5213/203/54541/80201/8671/3091/230/9611/5465/5663/351/28964/5224/11277/6521/229/26330/221264/5232/3692/5571/3630/339123/405/2026/5562/5027/3643/11182/5214/5207/89/50808/863/5223/2584/83440/3099/226/2821/5211/5154…	90
BP	GO:0007098	centrosome cycle	129/16611	131/18800	1.43817e-05	0.000204947	0.00013662	2242/23177/81565/23411/79648/1069/51199/5347/79884/5311/9662/118611/79441/282809/117178/54801/4869/10432/57710/9475/55125/338657/152185/3834/91147/7840/402/54930/585/5902/55226/2648/85459/10806/80817/26005/55835/4682/84552/54461/153241/1499/1639/84084/128866/7514/8409/10015/7405/2801/51652/221908/9639/348654/51510/1111/55559/23354/57132/93323/57787/50855/115106/100653515/10733/151648/9851/29901/5…	129
BP	GO:0140546	defense response to symbiont	278/16611	291/18800	1.45005e-05	0.000206178	0.000137441	4938/3627/3669/10346/3437/57337/4939/83666/5359/60489/684/4283/10410/84166/10417/197259/115004/26191/2537/3659/3600/1653/100507436/246778/3429/51311/4940/10206/91543/10269/958/54765/3660/2633/55718/8547/84282/10875/200316/4600/51257/6039/8638/79594/11035/85363/6737/79844/51284/55337/81622/64135/117854/9140/10859/10581/200315/6036/4615/5551/6772/8673/661/29072/10475/81844/3665/146857/10964/7353/71…	278
BP	GO:0046467	membrane lipid biosynthetic process	145/16611	148/18800	1.4888e-05	0.000211217	0.0001408	54898/29095/29906/2528/55650/51604/10026/80157/6482/8560/64834/8398/5023/10351/53947/5580/142891/5007/256435/8612/8611/80055/3491/10715/80235/20/56624/5277/427/130367/6487/10690/9200/55627/259230/54965/27090/2531/242/9488/83723/171546/8708/51227/6609/2629/165679/89792/56848/51495/8702/9487/8703/8813/127550/8877/151742/124976/2055/79603/8707/59344/6610/9091/51097/340485/9218/23556/23683/64090/2537…	145
BP	GO:0046661	male sex differentiation	160/16611	164/18800	1.53174e-05	0.000216826	0.000144539	3552/5154/7490/30812/1495/51665/9985/268/1545/6777/23598/1399/10184/2623/7042/4090/7022/400629/2627/317719/10371/5926/666/9825/10046/8751/657/1761/4323/2697/7474/3624/638/59338/2255/11086/54361/8433/653/50846/4089/2488/598/26471/128637/6926/8894/3148/1718/10018/6715/3293/596/51804/51742/1499/3625/1636/3020/9667/7482/4824/6662/5914/4036/3972/56956/55366/3815/56159/3622/367/642658/2175/867/378948/5…	160
BP	GO:1901215	negative regulation of neuron death	202/16611	209/18800	1.53984e-05	0.00021749	0.000144981	5176/7471/2730/1051/11151/27324/57103/84678/947/4099/23411/3162/1981/6648/131450/7466/2185/2932/163/135112/29082/10457/7133/2896/284/409/5582/4841/6347/84062/3717/27429/219699/2898/23529/8013/4852/666/4192/627/4776/100528062/1270/23657/10399/8326/8846/65018/3572/2668/7248/4671/8829/4747/4204/9244/120892/91304/3725/2019/56751/54463/11315/598/5978/3265/7301/84280/2065/4908/6418/387/5071/64802/2629/…	202
BP	GO:0030522	intracellular receptor signaling pathway	253/16611	264/18800	1.54673e-05	0.000217979	0.000145307	10413/92610/2171/9113/5165/26191/8856/7026/6714/4940/51296/196/7101/56937/406/84282/23411/1540/4848/80216/4330/8638/7533/1399/55885/9249/6096/64135/9604/56603/26508/650/9325/3717/6774/3665/6294/57658/6597/6049/8013/7353/340665/7128/2103/8611/23369/8767/51366/7421/149563/9063/246/7068/10013/144811/25959/7099/4306/5467/3172/1592/2033/5292/23028/811/161582/2852/54941/8854/6257/51389/121260/1488/7181…	253
BP	GO:0051607	defense response to virus	277/16611	290/18800	1.57256e-05	0.000221131	0.000147408	4938/3627/3669/10346/3437/57337/4939/83666/5359/60489/684/4283/10410/84166/10417/197259/115004/26191/2537/3659/3600/1653/100507436/246778/3429/51311/4940/10206/91543/10269/958/54765/3660/2633/55718/8547/84282/10875/200316/4600/51257/6039/8638/79594/11035/85363/6737/79844/51284/55337/81622/64135/117854/9140/10859/10581/200315/6036/4615/5551/6772/8673/661/29072/10475/81844/3665/146857/10964/7353/71…	277
BP	GO:0042476	odontogenesis	128/16611	130/18800	1.60556e-05	0.000225273	0.00015017	362/93/1277/256764/1495/29887/5054/5308/6714/54829/860/947/54757/358/11096/3714/2296/682/7042/650/4982/1278/3912/2627/340419/1758/2263/657/25818/3624/2255/79641/6336/3066/5251/123041/2736/10018/55512/10117/1746/152816/387/133/5083/1435/64065/1499/1745/7189/655/1906/3065/10468/7475/6522/5465/2249/8600/249/258/752014/26504/6569/431707/29123/93650/54959/363/8313/1896/64919/3694/9464/401138/10913/646…	128
BP	GO:0030324	lung development	174/16611	179/18800	1.61444e-05	0.000226022	0.000150669	1116/5154/10630/10413/1281/93/84525/6431/4781/3488/4846/55294/84695/9231/10253/2719/55211/54206/7422/4015/3675/10252/1522/54542/64220/64399/57493/83931/7534/7048/2627/340419/2294/57333/26257/51668/23657/147372/2263/657/7068/4323/2735/7474/3791/5950/2252/429/5595/2302/2255/2033/5251/3202/7477/4087/5604/2736/8854/1050/26154/3290/100/6664/7917/55512/80004/9509/7067/123872/8817/8546/6670/1499/1636/43…	174
BP	GO:0031532	actin cytoskeleton reorganization	110/16611	111/18800	1.62308e-05	0.000226237	0.000150812	8572/4627/51225/2242/29780/6464/2039/8477/7226/23607/90668/25/2934/55561/2185/50488/146206/55971/203447/84062/253260/397/55604/79778/3645/3059/9723/2059/4192/27/84168/5911/51676/5770/2252/10278/2255/8829/1436/9024/8394/7430/9535/80115/10458/3265/4908/54857/64098/57091/387/3055/80731/9578/4289/5339/2885/1525/29085/1440/10411/3815/9855/396/1365/7082/10850/11132/116985/5898/83872/2241/149461/26053/2…	110
BP	GO:0072009	nephron epithelium development	110/16611	111/18800	1.62308e-05	0.000226237	0.000150812	10413/7471/255743/8826/5175/5727/7490/30812/25937/3913/947/3217/2719/7422/8842/5420/9788/2296/26508/650/100133941/6772/5311/5087/3237/182/4643/2668/2302/4868/54361/4609/7477/4089/3611/26585/596/9863/51804/1499/7482/6662/7849/5310/55366/1739/64412/7481/7475/2247/9500/65266/4435/54806/1909/84445/6928/2297/186/6943/5800/55083/3207/7827/6469/1910/10409/56998/6299/7021/3911/4853/2131/130497/79192/38/5…	110
BP	GO:0061025	membrane fusion	159/16611	163/18800	1.69502e-05	0.000235748	0.000157153	5104/5322/10451/80183/83871/11151/203062/6504/10228/54809/6843/26258/858/8676/2621/4033/928/26509/8673/81555/9882/6857/152015/1514/9392/286753/25801/7075/55207/6809/10652/146378/2352/284680/84272/84286/8774/5819/8692/6616/23557/4905/9527/5877/9381/2054/55850/9066/112476/389827/11063/10059/9482/51272/90342/9342/9341/80208/135927/101929726/208/23400/11261/6812/57531/284359/9023/8877/116841/339168/7…	159
BP	GO:0034470	ncRNA processing	400/16611	424/18800	1.71062e-05	0.000237045	0.000158017	3669/6230/84128/6234/339175/1653/80746/83480/113802/4234/23264/285855/10269/5036/55636/11180/285381/25983/10607/51602/9790/6227/6165/54920/81890/84267/23160/2926/4839/10199/22894/92105/6894/64172/221078/6229/4736/83732/4613/54901/6774/8737/11340/55695/134637/57508/84705/26024/63899/3735/51531/10528/10940/54663/27161/9836/54974/23369/51018/25879/11103/55813/26173/56342/79863/57050/54802/113000/510…	400
BP	GO:0050769	positive regulation of neurogenesis	214/16611	222/18800	1.71178e-05	0.000237045	0.000158017	23440/5176/63950/29882/30812/9820/81565/4099/8482/140578/51393/1627/23129/170825/7422/1826/10636/51265/5583/23316/7224/5324/7424/4076/443/7133/6091/51199/650/9353/4825/2043/1946/23529/1954/2335/11344/84504/10215/4131/4192/27067/627/4067/3458/100528062/26259/6792/9148/7852/10507/5764/9001/3572/7097/644943/57165/429/8829/4609/4988/4747/23028/63925/3066/706/4137/2852/23654/5604/26230/23013/55179/797…	214
BP	GO:0014031	mesenchymal cell development	88/16611	88/18800	1.8082e-05	0.000249853	0.000166555	30812/5308/8482/553115/2296/26508/2335/9723/1947/340665/182/10371/6405/90/4902/23603/10507/657/2668/9221/3357/5595/8092/8829/8854/223117/10016/6664/9965/596/3670/3084/8929/10505/10501/6662/55698/309/655/1906/3091/2637/1000/8828/84541/1909/5979/5594/23493/2066/9464/4254/65979/83989/6949/6469/1910/9037/57057/10370/3911/10512/6591/59349/56920/1908/10500/3280/2303/6899/998/7869/80031/58495/54437/5755…	88
BP	GO:0060485	mesenchyme development	287/16611	301/18800	1.8221e-05	0.000250781	0.000167173	51384/10630/10413/114990/1277/221662/7490/6275/30812/25937/5308/4846/9820/2487/268/84695/9231/10253/3170/8482/55211/677/553115/286204/10252/2932/161742/6091/2296/8463/26508/7042/650/6772/8320/3249/5311/2043/187/4092/2335/7048/9723/1947/340665/182/10371/6405/4192/2294/2042/90/8751/4902/23603/2263/9475/10507/657/8091/2668/23187/10979/9221/3357/7474/23332/81610/1482/6939/5595/55746/8092/6934/2255/88…	287
BP	GO:2000779	regulation of double-strand break repair	109/16611	110/18800	1.82279e-05	0.000250781	0.000167173	51111/83666/54799/158880/115004/80314/26122/55693/10933/60/54537/7454/23126/64210/6944/7468/10524/29072/57634/56893/23347/51366/55719/8091/196528/149840/23028/151636/254225/4255/8607/84309/92797/78990/8089/64110/6118/112441434/63979/84787/55183/10459/5371/55135/23514/2187/441161/7158/55086/9643/5888/24144/1111/116028/54386/142/7913/64769/10856/151987/10721/86/55010/5932/80311/7336/2305/55611/5525…	109
BP	GO:0002181	cytoplasmic translation	143/16611	146/18800	1.83753e-05	0.000252264	0.000168162	6230/221662/6234/23521/3184/6188/285381/4733/6142/6168/6227/1981/6165/120526/6191/5936/6170/10492/85451/2107/6222/132864/1975/6229/4736/6167/6210/6181/6207/6173/6147/6144/6136/92715/6235/4690/25946/6204/6132/6208/8668/1819/6233/6189/8661/6201/1983/51389/6139/1974/7555/64506/6205/28985/6175/8664/2332/8894/6160/5315/6223/22849/6202/1939/51611/10642/6135/16/255308/6193/1968/6231/6187/6169/7311/51441…	143
BP	GO:0097305	response to alcohol	226/16611	235/18800	1.84343e-05	0.000252529	0.000168339	10919/841/5727/1728/8061/1495/2822/761/57817/1234/2806/3184/196/1571/2903/6586/1545/2354/6279/2539/1066/6648/6869/5734/2185/9076/5031/9353/5999/4880/1621/54762/1946/31/1236/1535/3490/7048/847/11184/2059/1268/5732/8751/2230/20/2263/10287/3624/6000/4986/4609/4988/551/4747/64083/3066/706/4087/2782/284254/4255/1582/2550/2/6366/130/3709/598/6554/978/2902/9965/5563/2770/116443/387/117/266743/7804/4040/…	226
BP	GO:0006643	membrane lipid metabolic process	200/16611	207/18800	1.85184e-05	0.000253137	0.000168744	54898/29095/29906/2528/2822/55650/51604/4258/3696/27163/10026/80157/1545/6482/8560/64834/4758/3074/129807/8439/8398/5023/10351/53947/5580/2527/27429/142891/5007/2517/256435/392636/8612/8611/80055/3491/80772/285362/2581/55852/10715/80235/20/56624/5277/427/130367/6487/10690/9524/9200/23659/64781/55627/259230/54965/26154/10825/27090/51228/2531/242/9488/83723/171546/2760/55512/8708/51227/6609/2629/55…	200
BP	GO:0002699	positive regulation of immune effector process	238/16611	248/18800	1.93528e-05	0.000263978	0.00017597	51111/5322/3566/6778/8302/10584/54209/10417/2242/941/3122/26191/6504/972/640/8764/1653/114836/5724/64332/91543/958/718/2268/54537/3823/8482/8547/5777/6777/3140/5880/23411/3162/2220/8741/729230/3133/6688/3916/5590/64581/6850/117854/1604/10859/3689/2623/22890/7468/3142/8673/30817/8809/23529/3684/4189/10865/3598/4843/8013/3965/11314/117157/114548/388325/79915/695/2294/51744/2219/4292/4067/136/3458/8…	238
BP	GO:0048839	inner ear development	186/16611	192/18800	1.9448e-05	0.000264708	0.000176458	5154/115908/7471/2535/8323/26020/55584/6385/2487/55636/10253/4919/3714/55283/3198/83605/220/3208/5013/7042/650/55084/80184/3249/2043/9368/6935/182/2103/1856/79955/8516/8549/11020/2263/613/64072/1301/497189/7474/121227/4094/65217/5396/8820/131149/2255/1027/645104/3638/7401/9261/51168/525/6657/8825/1050/54845/51761/1280/6926/51804/4647/4760/8929/219736/8557/25861/4646/6662/7849/643226/114902/117531…	186
BP	GO:0048736	appendage development	172/16611	177/18800	1.96301e-05	0.000266051	0.000177353	4223/1281/221833/5727/8323/22943/5308/7026/1889/860/55636/51776/2719/3227/64093/3226/54542/494470/83999/1311/56603/27152/7704/7042/5087/1954/3655/340419/23657/2263/6659/657/10979/9742/2697/7474/27173/221322/5396/2255/64327/100131390/51222/57167/3066/57560/2648/5125/23288/3664/8854/2019/4089/775/5307/26005/1280/6664/6926/51003/10018/26585/65057/30062/4041/27077/1499/6662/5914/29985/655/3238/6497/2…	172
BP	GO:0060173	limb development	172/16611	177/18800	1.96301e-05	0.000266051	0.000177353	4223/1281/221833/5727/8323/22943/5308/7026/1889/860/55636/51776/2719/3227/64093/3226/54542/494470/83999/1311/56603/27152/7704/7042/5087/1954/3655/340419/23657/2263/6659/657/10979/9742/2697/7474/27173/221322/5396/2255/64327/100131390/51222/57167/3066/57560/2648/5125/23288/3664/8854/2019/4089/775/5307/26005/1280/6664/6926/51003/10018/26585/65057/30062/4041/27077/1499/6662/5914/29985/655/3238/6497/2…	172
BP	GO:0043410	positive regulation of MAPK cascade	461/16611	491/18800	2.03888e-05	0.000274035	0.000182675	1116/3552/51384/5154/5322/55024/255743/5320/388121/8826/9518/1857/7162/54209/26191/6504/9607/22943/972/84432/2213/6714/6464/195827/55294/5871/958/6188/10253/8482/5155/285613/11235/9365/4055/3672/6352/7422/25/858/85363/10268/1399/6688/2358/8312/60370/5590/2621/3383/2321/64581/2185/50488/6850/338557/353514/10457/284/1230/8322/409/3489/6091/5345/5031/7042/112464/4615/650/100133941/920/6347/6846/3717…	461
BP	GO:0007612	learning	142/16611	145/18800	2.04101e-05	0.000274035	0.000182675	7162/8061/22943/84152/5896/2903/5153/6547/10636/25/6869/6865/56924/6900/64220/143941/1621/10716/4923/23237/7143/6833/3269/23657/5764/7248/57468/7097/4986/6616/4204/6543/2019/577/3688/378/2902/85358/27020/7337/5071/266743/5538/84502/50944/84896/23542/8831/1996/9378/9775/2055/3156/5532/3091/57502/57144/85461/10411/3815/1497/351/28964/23208/3064/54915/55236/84687/440275/2258/23259/23152/26047/22829/…	142
BP	GO:0031023	microtubule organizing center organization	142/16611	145/18800	2.04101e-05	0.000274035	0.000182675	2242/23177/81565/23411/79648/1069/51199/5347/79884/5311/9662/118611/79441/282809/117178/54801/4869/10432/57710/9475/55125/338657/152185/23332/3834/91147/7840/402/2302/54930/585/5902/55226/2648/85459/124093/10806/80817/26005/55835/4682/84552/54461/153241/1499/1639/84084/128866/7514/8409/10015/7405/2801/51652/221908/9639/348654/51510/1111/55559/23354/57132/93323/1874/57787/50855/115106/100653515/10…	142
BP	GO:0001892	embryonic placenta development	87/16611	87/18800	2.04774e-05	0.000274035	0.000182675	841/1051/7262/7026/5155/4188/677/9021/29072/8320/5311/639/3491/10653/26259/3481/2263/7855/84870/653/7477/5604/23462/1050/5340/6692/57448/133/59343/6670/2709/5310/655/3091/2885/6789/4435/2034/5594/22846/8648/10733/23493/79893/1437/3880/374900/1046/10370/9421/113026/405/7274/79733/10959/6665/10049/2624/79977/1956/207/3280/6788/7942/1045/144455/4838/51176/8521/50814/5469/1028/2186/58495/6768/430/101…	87
BP	GO:0010232	vascular transport	87/16611	87/18800	2.04774e-05	0.000274035	0.000182675	2171/81031/8714/376497/489/9153/482/9368/6541/387700/8884/9498/6508/23428/6506/84889/6567/20/7037/6533/6528/6580/6540/6543/11309/10991/6573/2030/6513/54407/6542/177/480/9429/3953/10057/53919/6558/4036/1244/8671/948/81539/6526/23446/6584/9194/553/6517/4037/348/3177/6509/10257/6529/8140/6582/222962/6565/10396/6581/114134/3643/552/10060/6507/84879/92745/6510/493/5243/6505/6566/9376/477/54716/6536/10…	87
BP	GO:0150104	transport across blood-brain barrier	87/16611	87/18800	2.04774e-05	0.000274035	0.000182675	2171/81031/8714/376497/489/9153/482/9368/6541/387700/8884/9498/6508/23428/6506/84889/6567/20/7037/6533/6528/6580/6540/6543/11309/10991/6573/2030/6513/54407/6542/177/480/9429/3953/10057/53919/6558/4036/1244/8671/948/81539/6526/23446/6584/9194/553/6517/4037/348/3177/6509/10257/6529/8140/6582/222962/6565/10396/6581/114134/3643/552/10060/6507/84879/92745/6510/493/5243/6505/6566/9376/477/54716/6536/10…	87
BP	GO:1901653	cellular response to peptide	342/16611	361/18800	2.1435e-05	0.000286249	0.000190817	5327/5919/7471/445/6778/9518/54209/8835/26191/2822/760/2213/6548/64900/6714/84709/6464/81565/1545/8651/376497/3718/1395/6777/23411/837/9365/54328/5106/54206/815/858/677/185/2358/5590/3383/388581/2645/2203/2932/4641/132864/51043/9021/57085/5295/55971/23433/376267/6599/4825/5580/6772/3717/2043/6774/8473/9882/493829/5167/1583/8013/3397/1535/3645/23621/4131/1176/4067/286753/8412/8767/2308/3481/9475/2…	342
BP	GO:2000060	positive regulation of ubiquitin-dependent protein catabolic process	107/16611	108/18800	2.29838e-05	0.000306291	0.000204177	1263/10134/55294/6613/11236/1454/1191/149628/8312/2185/9604/2932/51343/127544/5347/10221/4092/11337/84871/26259/6872/10399/255488/440730/55743/153769/120892/26263/7805/1050/857/7415/90637/29979/64110/3303/5071/2629/1950/23640/131377/10425/2931/4780/57761/122809/344558/4193/1601/79699/85409/5663/5728/64326/1453/8078/9978/285671/28952/79016/51667/1452/1855/9655/57630/5988/27185/10273/5886/25820/289…	107
BP	GO:0033627	cell adhesion mediated by integrin	86/16611	86/18800	2.31899e-05	0.000308392	0.000205578	3683/255743/9358/23075/916/22915/1969/5054/3690/3696/8631/1545/5777/83706/55612/3672/6352/1399/3675/5328/3383/5420/6850/3681/3678/3689/3679/7042/3684/1803/54997/3695/3655/4067/3685/3071/8516/3687/9780/9404/83700/1942/100/6366/7448/3688/1307/3680/4582/340533/199920/64805/80173/3273/340485/5979/65125/3694/5781/3682/1398/6591/2131/10519/6868/5140/10563/3676/5747/4856/8515/3674/3673/2303/8754/3691/20…	86
BP	GO:0050731	positive regulation of peptidyl-tyrosine phosphorylation	184/16611	190/18800	2.34929e-05	0.000311771	0.00020783	55024/83666/1489/916/5175/54209/2069/941/972/8764/3600/3690/6714/55294/958/5155/54625/6352/7422/25/7060/2621/64581/2185/30844/6850/7132/3678/353514/2623/284/409/100133941/920/253260/3717/2043/1946/23529/134/3059/5007/1856/2261/4067/90/3458/8767/374/3481/9148/1270/79705/10507/3572/5770/5753/2252/2255/8829/1436/9244/3066/3593/285489/3570/1942/7448/8784/148/51561/2065/80725/4908/26585/5062/685/57091…	184
BP	GO:0002706	regulation of lymphocyte mediated immunity	170/16611	175/18800	2.38538e-05	0.000315247	0.000210147	51111/259307/6778/10225/8302/3077/54209/3122/6504/2213/114836/100507436/196/91543/958/718/54537/7454/3823/5777/6777/3140/8741/729230/3575/11035/3133/3916/5590/5272/1604/10859/7133/22890/409/7468/8809/3146/23529/4092/10865/3965/117157/114548/79915/695/3821/4292/3071/3123/51010/7037/7855/725/81545/146850/567/100528032/54795/55061/2302/5819/7784/149840/3593/84868/116449/634/121260/6318/10125/51561/3…	170
BP	GO:0007254	JNK cascade	170/16611	175/18800	2.38538e-05	0.000315247	0.000210147	3552/51384/26191/6504/2213/5871/51776/11221/1540/4055/259/140885/29969/1399/1845/8312/51284/5734/2185/2218/50488/5345/23239/4615/171392/10221/8737/3146/2898/1236/114609/10371/10912/11184/128853/2047/22881/136/8767/51135/5911/65018/7185/7474/153769/7099/54986/4671/4868/90441/1852/120892/9344/148170/7477/4790/6366/10125/9479/3265/9965/5609/10114/64853/222643/9448/64170/5071/10044/3654/177/27035/272…	170
BP	GO:0007018	microtubule-based movement	373/16611	395/18800	2.47668e-05	0.000326635	0.000217739	54970/92749/25790/6990/64147/200162/79864/348807/6683/79443/9585/84709/25876/84074/3476/4117/84229/26258/83853/81565/63971/4744/387712/79809/3916/3315/8701/6869/116369/5590/51314/55172/6865/10096/164781/23046/220136/83659/286464/55614/221458/246176/53340/9576/55201/84062/64518/9368/23299/361/50632/152015/55081/57576/89953/4131/84223/1176/27067/79582/7014/283629/85478/117178/338/22906/25981/25911/…	373
BP	GO:0031668	cellular response to extracellular stimulus	235/16611	245/18800	2.50003e-05	0.000328354	0.000218885	10631/440738/10919/51520/84557/79792/5899/3178/1277/55062/8061/2242/57535/9607/3600/55630/10325/8131/3170/23411/3162/79726/4330/1981/3920/389493/643246/2621/7486/432/84219/6494/81788/51422/154743/7378/11337/11345/51100/1026/4067/136/10533/28960/220441/9463/2308/6506/168620/27327/7421/1965/7248/8897/53632/25828/25959/7494/10514/56270/9681/5595/5292/54361/3428/23274/5366/150094/120892/4654/26263/52…	235
BP	GO:0051403	stress-activated MAPK cascade	235/16611	245/18800	2.50003e-05	0.000328354	0.000218885	3552/51384/54209/26191/6504/2213/5871/7538/3476/51776/11221/285613/1540/11235/4055/259/7422/140885/29969/677/1399/6688/1845/8312/51284/5734/64581/2185/2218/50488/83605/3489/5345/7042/23239/4615/650/171392/5603/10221/8737/3146/2898/1236/114609/3965/10371/10912/11184/388325/128853/2047/22881/136/8767/2308/51135/5911/65018/7185/7474/153769/7099/54986/5595/4671/4986/4868/90441/4609/23008/1852/120892/…	235
BP	GO:0032946	positive regulation of mononuclear cell proliferation	140/16611	143/18800	2.51705e-05	0.00032991	0.000219922	3552/10451/10288/916/79679/11151/923/941/26191/6504/972/3600/958/6188/3718/6777/64926/959/729230/6352/3133/3485/6869/23308/3115/6850/1604/84433/4615/100133941/970/3717/3146/23529/6541/114609/7048/3965/1947/80380/7535/79915/1026/4773/4352/8767/3071/3481/7293/942/7037/2214/3572/4690/7099/10673/126259/3559/2255/8744/7784/63925/3574/3593/84868/100/51561/10148/3594/1435/177/596/1725/115352/30835/912/8…	140
BP	GO:0030832	regulation of actin filament length	155/16611	159/18800	2.53805e-05	0.000330622	0.000220396	23075/9113/11151/7408/54942/7114/2039/93663/7454/822/1627/51429/2934/54961/2185/146206/55971/9353/5580/253725/9873/91663/253260/830/832/79822/51466/11344/1236/55604/3059/2059/9026/343578/9948/3071/163782/1073/246/64857/4690/54434/6840/829/585/4868/9168/56203/286527/148170/382/375189/89848/10677/11013/80115/6366/442721/10565/10458/29766/387/3055/8195/64223/10178/2314/7429/6712/25802/2006/6387/5085…	155
BP	GO:0050657	nucleic acid transport	155/16611	159/18800	2.53805e-05	0.000330622	0.000220396	10643/54830/3178/10644/7538/9961/130132/4600/8570/8106/677/10211/84271/1069/4641/10073/8658/9908/23144/26019/29072/23299/54890/7048/9818/23237/6428/5903/387990/4869/54847/57097/144983/9631/57510/3181/3837/7248/26993/84324/23049/9284/55746/7919/55421/65110/3800/10762/3267/9804/26097/65083/23511/2332/11097/7263/23293/10482/6830/10642/79902/23165/4686/59343/25909/4928/8021/643136/57187/10128/285877/…	155
BP	GO:0050658	RNA transport	155/16611	159/18800	2.53805e-05	0.000330622	0.000220396	10643/54830/3178/10644/7538/9961/130132/4600/8570/8106/677/10211/84271/1069/4641/10073/8658/9908/23144/26019/29072/23299/54890/7048/9818/23237/6428/5903/387990/4869/54847/57097/144983/9631/57510/3181/3837/7248/26993/84324/23049/9284/55746/7919/55421/65110/3800/10762/3267/9804/26097/65083/23511/2332/11097/7263/23293/10482/6830/10642/79902/23165/4686/59343/25909/4928/8021/643136/57187/10128/285877/…	155
BP	GO:0050886	endocrine process	85/16611	85/18800	2.62616e-05	0.000341401	0.000227582	1889/4846/140606/56729/5021/185/6869/55503/6865/1522/8322/5345/2661/1535/3291/56670/2697/3624/668/81285/6196/4986/5125/1585/4089/114897/91608/6926/2028/387/27035/51083/3625/1636/4824/1906/9727/1601/1408/2149/553/5972/59272/2297/186/5781/1511/3952/1910/2587/654/338442/3845/1359/51762/552/1908/1407/64855/1393/3623/10699/1816/554/3814/1215/7110/7349/2150/80223/114899/5468/5443/3784/3553/1394/51738/1…	85
BP	GO:0002064	epithelial cell development	196/16611	203/18800	2.67316e-05	0.000345397	0.000230245	3552/4478/10413/5624/1306/8826/29842/5175/1969/30812/57103/4233/57619/6714/3913/23086/26051/406/5155/56913/1903/1775/7422/9480/1003/3383/5420/7132/2932/83605/2623/25932/9076/4615/4825/286451/57493/91663/196383/182/5926/639/57835/10653/4643/7852/10818/9475/1761/2355/3572/2697/7474/7716/153562/3172/2302/2828/4868/5906/54538/1041/2810/3202/653/7477/7430/10481/26154/6098/1021/7431/128637/2876/10152/9…	196
BP	GO:0071383	cellular response to steroid hormone stimulus	196/16611	203/18800	2.67316e-05	0.000345397	0.000230245	5176/5327/10413/445/9113/842/6714/84709/7101/56937/7538/406/1545/23411/1977/4848/5106/358/54206/677/7533/55885/9604/7023/26508/9325/3717/6294/57658/6597/6049/8013/6755/476/2103/8611/90/51366/149563/9063/10013/25959/6754/81285/4306/5467/2033/23028/811/161582/4654/2852/11057/114907/6257/51389/7181/196541/11315/5978/3275/678/10018/23376/6715/55325/3303/7337/387/266743/55818/11331/3670/23543/112398/5…	196
BP	GO:1901605	alpha-amino acid metabolic process	196/16611	203/18800	2.67316e-05	0.000345397	0.000230245	6999/259307/445/2730/51268/3081/586/2184/23463/51166/435/4846/2806/26258/8564/89874/2744/79814/2618/8659/443/143941/22929/5831/4357/9056/123688/1800/4843/5352/5832/85300/4143/384/100287520/29920/60496/11112/23657/5860/51380/89839/51540/1610/64116/2673/5092/4507/8942/3242/790/3172/4522/58478/159/131669/4204/23409/549/440/4482/883/11315/27165/2731/339983/7263/2356/56474/63826/80017/54529/23576/5851…	196
BP	GO:0051090	regulation of DNA-binding transcription factor activity	425/16611	452/18800	2.74085e-05	0.000353425	0.000235597	4057/10346/7471/6424/84166/2535/5727/8061/8323/9641/170959/5687/6425/114769/8986/7114/268/10206/958/4795/6188/284434/3170/1545/84875/58487/23411/4919/3162/307/1540/4188/8553/6279/9759/959/1191/7422/84662/11035/5583/815/121268/85363/7466/6688/6737/10211/5590/2621/64581/57121/3656/6850/117854/58509/602/55502/57413/4794/8322/409/55906/338699/9908/26508/84433/4615/6672/650/4825/171392/8809/8320/10475…	425
BP	GO:0033865	nucleoside bisphosphate metabolic process	123/16611	125/18800	2.77949e-05	0.000354012	0.000235989	6999/122970/55711/51268/54898/5165/51166/10861/64834/23181/32/79717/80221/2180/26027/10965/5162/641372/134526/31/5167/8801/284486/25874/2181/9061/641371/10380/1836/23205/54995/4967/23597/9524/9200/6799/51703/81616/5164/6820/109703458/347734/4597/5163/10005/5538/80347/283927/1738/10249/8694/9374/3156/23417/84693/60490/128486/1737/84532/6296/64087/6783/2182/142827/27233/10157/1743/51000/5161/445329…	123
BP	GO:0033875	ribonucleoside bisphosphate metabolic process	123/16611	125/18800	2.77949e-05	0.000354012	0.000235989	6999/122970/55711/51268/54898/5165/51166/10861/64834/23181/32/79717/80221/2180/26027/10965/5162/641372/134526/31/5167/8801/284486/25874/2181/9061/641371/10380/1836/23205/54995/4967/23597/9524/9200/6799/51703/81616/5164/6820/109703458/347734/4597/5163/10005/5538/80347/283927/1738/10249/8694/9374/3156/23417/84693/60490/128486/1737/84532/6296/64087/6783/2182/142827/27233/10157/1743/51000/5161/445329…	123
BP	GO:0034032	purine nucleoside bisphosphate metabolic process	123/16611	125/18800	2.77949e-05	0.000354012	0.000235989	6999/122970/55711/51268/54898/5165/51166/10861/64834/23181/32/79717/80221/2180/26027/10965/5162/641372/134526/31/5167/8801/284486/25874/2181/9061/641371/10380/1836/23205/54995/4967/23597/9524/9200/6799/51703/81616/5164/6820/109703458/347734/4597/5163/10005/5538/80347/283927/1738/10249/8694/9374/3156/23417/84693/60490/128486/1737/84532/6296/64087/6783/2182/142827/27233/10157/1743/51000/5161/445329…	123
BP	GO:0043244	regulation of protein-containing complex disassembly	123/16611	125/18800	2.77949e-05	0.000354012	0.000235989	23075/6683/79443/25876/2039/157922/10269/822/2934/55337/2107/9140/146206/253725/55201/830/832/56893/11344/55604/2059/4131/55239/9948/1073/10013/6840/23332/57662/829/23274/56203/154/10677/442721/11213/29766/10241/2629/2314/7429/25851/6712/140775/10300/25802/50853/57551/65094/7405/120/324/89927/2258/345611/4943/10763/23064/118/23616/6709/136319/11075/9037/9711/146057/11078/9474/642574/7111/57026/96…	123
BP	GO:0070585	protein localization to mitochondrion	123/16611	125/18800	2.77949e-05	0.000354012	0.000235989	84709/10134/55294/5880/89781/637/56947/4285/3308/27429/51100/79778/84134/160140/118424/387990/92609/56993/65018/7855/26517/100652748/9868/5018/54708/120892/23409/706/4137/1459/3098/3320/51025/64112/9804/9520/27113/10059/3329/5071/7323/8546/10055/10425/728489/83943/2931/54543/9049/51079/130916/59286/10245/26521/10452/9141/5898/100287932/10531/8314/25793/26515/26519/285521/23203/9530/3305/79568/131…	123
BP	GO:0035150	regulation of tube size	139/16611	142/18800	2.79464e-05	0.000354012	0.000235989	2730/2643/5910/1889/4846/624/5021/3672/25/6648/185/6869/59342/8398/5023/1311/2702/5345/2296/3274/1621/134/136/3269/9732/9475/151/3827/5029/4313/3357/152/1131/54795/153/2243/5467/10242/551/5592/2837/2852/154/796/857/148/2876/387/133/8195/3350/1636/2166/1906/2244/4544/112/219537/3792/1909/6915/10365/2149/553/6546/2132/348/5286/59272/186/342527/952/8864/4881/3952/2982/1910/1373/9474/3630/2131/80852/…	139
BP	GO:0008064	regulation of actin polymerization or depolymerization	154/16611	158/18800	2.80654e-05	0.000354012	0.000235989	23075/9113/11151/7408/54942/7114/2039/93663/7454/822/1627/51429/2934/54961/2185/146206/55971/9353/5580/253725/9873/91663/253260/830/832/79822/51466/11344/1236/55604/3059/2059/9026/343578/9948/3071/163782/1073/246/64857/4690/54434/6840/829/585/4868/9168/56203/286527/148170/382/375189/89848/10677/11013/80115/6366/442721/10565/10458/29766/387/3055/8195/64223/10178/2314/7429/6712/25802/2006/6387/5085…	154
BP	GO:0016241	regulation of macroautophagy	154/16611	158/18800	2.80654e-05	0.000354012	0.000235989	10919/5899/55062/57535/57103/79443/10206/26086/23411/3162/11178/9140/29082/5768/529/823/56893/51100/60592/8767/836/10715/8992/65018/533/7416/10013/7248/254122/291/3791/23049/5595/10133/23274/120892/9637/6829/154/525/60412/64112/51322/112936/27244/23265/51606/26471/29979/5563/23545/29110/10241/2629/22930/55737/5289/25851/23400/6885/140775/535/4534/51382/340371/128866/8517/4734/3091/523/7405/26073/…	154
BP	GO:0016571	histone methylation	154/16611	158/18800	2.80654e-05	0.000354012	0.000235989	51111/4837/10919/94104/284058/55693/23411/4302/54904/54790/55904/55209/7469/54554/55352/11108/23067/3054/63976/7468/29072/26038/8473/59336/200424/150572/5926/80312/57673/84148/11091/340602/80335/11137/23168/56950/23028/4204/1786/84661/9739/63925/11105/55870/9682/7936/4089/79918/26097/9070/3275/64324/23512/7403/6839/55818/2091/6830/3006/51742/402569/1499/84787/55183/1789/3009/93166/65094/55683/387…	154
BP	GO:0046631	alpha-beta T cell activation	154/16611	158/18800	2.80654e-05	0.000354012	0.000235989	3566/6778/916/3077/941/3122/26191/5971/3659/8764/3600/114836/246778/64332/861/3702/84695/91543/8651/3718/64926/868/729230/10538/25/3133/5590/5734/864/6850/54542/602/9308/1604/26279/10859/51043/7704/149041/3142/8809/8320/257101/3717/6774/3146/4092/7048/6693/284194/3965/4818/11314/64115/1514/114548/7535/639/384/3707/50856/3662/3458/8767/3071/3123/57045/942/3593/3570/79576/100/51561/10148/3594/9479/…	154
BP	GO:0070665	positive regulation of leukocyte proliferation	154/16611	158/18800	2.80654e-05	0.000354012	0.000235989	3552/10451/10288/684/916/79679/11151/923/941/26191/6504/972/3600/958/6188/3718/128506/6777/64926/959/729230/6352/3133/3485/6869/23308/3115/6850/1604/84433/4615/100133941/970/3717/3146/23529/6541/114609/7048/3965/1947/80380/7535/79915/1026/4067/4773/4352/8767/3071/3481/7293/942/7037/2214/3572/1438/4690/7099/10673/5595/126259/3559/2255/1436/8744/7784/63925/3568/3574/3593/84868/100/51561/10148/3594/…	154
BP	GO:0006090	pyruvate metabolic process	105/16611	106/18800	2.89712e-05	0.000363997	0.000242644	4199/5165/57103/195827/55526/9759/5106/2819/387712/2645/2203/5162/51422/6774/8473/92483/8013/7167/3458/25874/7416/2023/53632/4967/5313/402/2033/4609/51085/3098/3607/5164/26471/2027/26137/5563/5315/221937/441531/5163/63826/669/5213/54541/1738/80201/8671/3091/230/9611/1737/5465/5663/351/28964/5224/3948/11277/5091/6521/229/26330/4200/5161/5232/8050/3692/5571/10873/5160/3630/339123/405/2026/5562/5027…	105
BP	GO:0120034	positive regulation of plasma membrane bounded cell projection assembly	105/16611	106/18800	2.89712e-05	0.000363997	0.000242644	7471/81565/23242/5880/10096/2932/146206/5295/23433/9662/11344/1236/2059/22871/9148/49856/10807/51364/9001/5879/54443/585/2823/8829/148170/7401/5064/79647/10677/6366/55835/2332/3265/989/10152/55704/6624/10178/153241/9750/64805/10801/55329/2909/538/163404/3815/221908/55845/3064/324/57787/79574/116985/23580/5898/10435/26053/9738/80199/9842/54849/139818/8976/10787/2475/375790/9696/26052/100506658/704…	105
BP	GO:0072329	monocarboxylic acid catabolic process	122/16611	124/18800	3.10083e-05	0.000384548	0.000256344	55268/33/10449/2184/64900/5106/57834/84129/32/27349/56603/340665/3030/66002/56898/1268/1376/8309/1962/160428/5467/219970/23659/54363/1592/1375/11057/5096/549/10478/54905/11001/26063/10005/5264/208/283927/55289/254013/10994/2166/23417/2108/2109/84693/197257/8660/3032/5465/3033/3028/205251/23175/5191/1056/10327/5226/5446/6822/1384/414328/83752/3952/3712/254552/5828/5826/38/2639/3667/1632/1892/83667…	122
BP	GO:1903313	positive regulation of mRNA metabolic process	122/16611	124/18800	3.10083e-05	0.000384548	0.000256344	27316/11051/221662/23034/56478/57690/3184/7538/4848/9567/8570/677/57472/154197/10492/54542/10140/22894/26058/149041/196513/11340/10262/27161/4292/28960/11044/27327/51010/123169/9475/9924/494115/29896/255967/29883/64282/64506/678/131405/9698/6434/22849/5436/10642/55095/4686/129563/4928/201626/339345/23318/23019/5935/4691/56853/51441/399664/56915/87178/91875/54915/378948/373863/79068/5393/79670/484…	122
BP	GO:0035296	regulation of tube diameter	138/16611	141/18800	3.1024e-05	0.000384548	0.000256344	2730/2643/5910/1889/4846/624/5021/3672/25/6648/185/6869/59342/8398/5023/1311/2702/5345/2296/3274/1621/134/136/3269/9732/9475/151/3827/5029/4313/3357/152/1131/54795/153/2243/5467/10242/551/5592/2837/2852/154/796/857/148/2876/387/133/8195/3350/1636/2166/1906/2244/4544/112/219537/3792/1909/6915/10365/2149/553/6546/2132/348/5286/59272/186/342527/952/8864/4881/3952/2982/1910/1373/9474/3630/2131/80852/…	138
BP	GO:0050671	positive regulation of lymphocyte proliferation	138/16611	141/18800	3.1024e-05	0.000384548	0.000256344	3552/10451/10288/916/79679/11151/923/941/26191/6504/972/3600/958/6188/3718/6777/64926/959/729230/6352/3133/3485/6869/23308/3115/6850/1604/84433/4615/100133941/970/3717/3146/23529/6541/114609/7048/3965/1947/80380/7535/79915/1026/4773/4352/8767/3071/3481/7293/942/7037/2214/3572/4690/7099/10673/126259/3559/2255/8744/7784/63925/3574/3593/84868/100/51561/10148/3594/177/596/1725/115352/30835/912/80381/…	138
BP	GO:0097746	blood vessel diameter maintenance	138/16611	141/18800	3.1024e-05	0.000384548	0.000256344	2730/2643/5910/1889/4846/624/5021/3672/25/6648/185/6869/59342/8398/5023/1311/2702/5345/2296/3274/1621/134/136/3269/9732/9475/151/3827/5029/4313/3357/152/1131/54795/153/2243/5467/10242/551/5592/2837/2852/154/796/857/148/2876/387/133/8195/3350/1636/2166/1906/2244/4544/112/219537/3792/1909/6915/10365/2149/553/6546/2132/348/5286/59272/186/342527/952/8864/4881/3952/2982/1910/1373/9474/3630/2131/80852/…	138
BP	GO:0098727	maintenance of cell number	138/16611	141/18800	3.1024e-05	0.000384548	0.000256344	10413/56478/84678/7101/27097/1977/4848/1656/6688/79648/84376/23160/22882/6944/80306/8320/6774/182/2103/80312/607/2308/79692/7004/9968/123169/6659/5764/657/8091/90390/8243/6939/23168/5396/8820/2255/5894/4609/57167/2648/53918/5460/7178/6657/9314/79576/8861/79918/5978/8202/6926/678/10001/9412/1994/55818/10642/4041/129563/1499/55183/6662/7849/339345/2177/23318/55124/23019/655/2176/79923/2146/6497/515…	138
BP	GO:0120254	olefinic compound metabolic process	153/16611	157/18800	3.10295e-05	0.000384548	0.000256344	8228/151056/54898/174/54884/7276/27122/5321/1571/5730/1545/127/6777/64834/57834/5742/11343/2053/9249/339761/220/216/650/1583/66002/3291/195814/1573/1549/246/27120/5950/240/54361/100137049/51635/653/1585/873/8854/8399/130/1562/247/2488/53630/242/5978/747/10858/26090/8912/2902/2876/6715/3293/64600/133/10005/158833/3991/5740/8694/2166/1543/239/3972/1553/57665/59344/1601/2946/3292/1544/57016/158835/8…	153
BP	GO:0046578	regulation of Ras protein signal transduction	181/16611	187/18800	3.11537e-05	0.000385338	0.000256871	5924/4983/10395/1281/27128/4233/81848/8477/9265/23550/10253/64926/8437/25/10211/3675/2203/10252/6091/84636/7042/57493/57221/10161/397/401387/8473/221002/11337/27334/22898/5516/2059/117178/3707/27/8878/9649/64283/440730/613/5879/25959/1902/27352/4653/440073/55738/2828/2255/5894/8829/8452/137735/100271927/57706/382/9002/115727/10565/3688/148/10125/55103/84078/9912/157285/347273/9448/10260/10928/221…	181
BP	GO:0002285	lymphocyte activation involved in immune response	194/16611	201/18800	3.20858e-05	0.000395331	0.000263532	51111/3566/3683/6778/3958/23075/3956/11151/5450/930/941/3122/5971/972/2213/114836/5873/246778/64332/202309/6556/84695/958/54537/6482/3718/10875/8741/959/10538/54518/25/4064/6688/3916/5590/5734/3383/2185/54542/602/10859/51043/7468/149041/3142/8809/8320/257101/6774/3146/23529/4092/6693/3965/4818/114548/4192/9452/79915/51744/4292/55619/3662/3458/8767/3071/3123/51010/942/7037/7248/7494/7099/2207/2012…	194
BP	GO:1901888	regulation of cell junction assembly	194/16611	201/18800	3.20858e-05	0.000395331	0.000263532	10395/7162/51225/1969/22943/6548/6714/6385/2039/9231/257194/4884/5021/7422/1981/25/5583/23316/27286/79953/10211/1845/55209/4641/9076/78999/139065/1946/187/4593/6281/22871/27067/347902/2047/627/2042/100528062/3987/23603/9475/10507/7855/4323/7248/10979/5879/7474/57633/7097/23332/3791/10611/79834/57662/8292/4653/8829/54361/5906/158038/6585/64284/57555/23768/382/857/577/3556/8861/1307/26585/9448/8462…	194
BP	GO:0034308	primary alcohol metabolic process	104/16611	105/18800	3.25224e-05	0.000399938	0.000266603	8228/151056/54884/7276/27122/27163/1545/127/2819/9249/339761/220/216/650/284161/1583/3291/217/195814/79153/8574/5950/54363/6799/54361/51635/653/1585/8854/130/1562/53630/11315/5978/27010/8912/219/2820/3991/8694/1543/57665/1601/1544/84532/57016/6783/158835/10327/1577/27233/131/445329/1584/6822/8644/6121/1910/57104/654/124/441282/126/112724/222/231/6818/5406/1645/51109/125/10170/224/222236/1646/9563…	104
BP	GO:0014032	neural crest cell development	83/16611	83/18800	3.36788e-05	0.000412565	0.000275021	30812/5308/8482/553115/2296/2335/9723/1947/340665/182/10371/6405/90/4902/23603/10507/657/2668/9221/3357/5595/8092/8829/8854/223117/10016/6664/9965/3670/3084/8929/10505/10501/6662/55698/309/655/1906/3091/2637/1000/8828/84541/1909/5979/5594/2066/9464/4254/65979/83989/6949/6469/1910/9037/10370/3911/10512/6591/59349/56920/1908/10500/3280/2303/6899/998/7869/80031/58495/54437/57556/7291/157506/652/6663…	83
BP	GO:0045921	positive regulation of exocytosis	83/16611	83/18800	3.36788e-05	0.000412565	0.000275021	3566/9545/5873/5724/6385/23086/2268/7447/7251/3916/6850/8398/3689/2623/376267/8673/9146/3684/6857/9498/1268/22871/136/3458/23332/201294/2243/7784/8913/134957/9367/9066/8912/55512/23400/56848/6812/94121/783/10015/2244/3596/27183/8027/164/8941/8911/5868/11267/3745/8618/341359/9525/8723/143425/6860/5874/7879/192683/2624/8372/3565/6845/6810/57126/27243/2266/2150/84932/6804/3822/5864/23122/93664/50487…	83
BP	GO:0051302	regulation of cell division	180/16611	186/18800	3.42157e-05	0.000418338	0.000278869	3552/5154/57325/5727/1263/2069/805/84432/6683/9585/79816/5155/63971/7422/7060/1069/55660/7424/346389/27152/7042/79998/84440/5347/4300/29072/79884/90293/51100/6755/847/2103/2277/4192/55689/10263/26189/3481/10807/10399/2263/11091/5764/3357/6840/2252/585/4609/8452/2124/5473/994/2810/2648/5460/114327/56241/6871/79541/598/8202/57448/201161/9903/685/387/146909/5289/8555/50838/64762/25909/54627/8556/522…	180
BP	GO:0016579	protein deubiquitination	152/16611	156/18800	3.43014e-05	0.000418582	0.000279032	25862/158880/6877/27097/57695/1540/124739/6737/9733/8975/84182/56970/51720/9100/23450/7128/57646/4287/54532/9825/8464/80013/51035/7347/117143/93624/7874/9913/9960/84640/10868/23172/100170841/2648/10869/7415/84132/219333/7375/11315/78990/401447/6873/645402/5071/57663/161725/645836/10213/55031/23326/10713/389856/10987/85015/139562/9097/9577/84196/80124/57558/100288520/728386/51377/100287205/8078/72…	152
BP	GO:1903322	positive regulation of protein modification by small protein conjugation or removal	137/16611	140/18800	3.44357e-05	0.000419417	0.000279589	83593/9111/26191/55294/868/9759/23551/79594/7466/553115/8312/9733/51343/284/5347/92369/79139/4092/11337/80279/8767/65018/55743/56160/150684/85453/378884/254170/8452/23028/120892/55208/2280/7805/25950/648/857/7415/378708/10016/29979/8915/7337/5071/23142/23640/79444/8555/131377/59343/10055/331/1025/5414/26272/8877/2931/6187/7189/329/57761/7321/10054/64127/11065/5728/54838/9978/57561/285671/55215/51…	137
BP	GO:0031570	DNA integrity checkpoint signaling	121/16611	123/18800	3.4589e-05	0.00041968	0.000279764	57805/79858/1263/472/51776/9656/51343/51720/26270/5514/26058/5347/80279/57646/1026/988/84126/8091/1027/60561/7919/9344/197342/54465/7508/79791/51322/51065/5883/4582/6118/8555/1112/26272/9575/163859/2177/5371/11200/57551/51499/90381/8738/6154/7158/4193/7157/51514/9577/1432/1111/144715/11277/990/29935/65975/440275/135458/5810/8318/545/4436/83990/3014/5781/2765/1869/4303/54962/4998/25949/51512/79968…	121
BP	GO:0042471	ear morphogenesis	121/16611	123/18800	3.4589e-05	0.00041968	0.000279764	115908/7471/2535/8323/3199/55584/2487/55636/10253/3198/220/5013/55084/80184/3249/9368/6935/1856/79955/8516/2263/613/64072/1301/497189/7474/121227/5595/5396/8820/2255/645104/3638/7401/51168/525/51761/1280/6926/51804/4647/219736/8557/25861/4646/6662/7849/643226/1906/6169/579/2637/4669/7545/340784/140469/1749/474/1909/2290/5594/140947/286262/1855/57053/4762/133060/3167/57728/10083/10427/124590/9935/…	121
BP	GO:0001841	neural tube formation	103/16611	104/18800	3.65059e-05	0.000441257	0.000294147	115908/10395/1857/2535/5727/7408/8323/9585/57619/6385/84678/23242/25/57216/8463/7798/7042/29072/6046/55081/1856/10653/836/8543/9968/6659/7248/7474/151449/4522/585/57167/2648/653/23654/6201/5567/6664/6692/8915/131405/133/5914/4036/56963/7189/655/4976/3091/6497/2909/51098/6789/317/4524/5916/5898/1855/80199/65979/25902/10427/11146/7289/10370/26160/6422/57545/57822/7040/10959/10522/5076/5216/23552/14…	103
BP	GO:0022600	digestive system process	103/16611	104/18800	3.65059e-05	0.000441257	0.000294147	362/1890/29887/57817/12/80168/5021/358/3783/5733/6869/887/3274/4588/9026/4192/336/7442/7421/497189/7099/5950/1131/3658/2255/4986/64241/7430/7031/1582/387129/3605/7429/4760/6662/389015/10062/56667/335/9245/2693/948/6779/29881/64127/11171/48/65266/6446/6343/116519/6584/1056/140947/65125/340547/27347/54106/337/4762/1314/3952/1814/5357/10162/7032/65010/64240/118471/4583/2169/5406/1645/4883/3949/64081…	103
BP	GO:0006399	tRNA metabolic process	179/16611	185/18800	3.75724e-05	0.000453288	0.000302167	51520/2976/339175/1653/80746/83480/4234/11180/285381/54920/81890/84267/2926/10056/6894/64172/221078/54901/7453/11340/134637/84705/26024/146857/63899/2975/3735/9328/51531/10940/9836/54974/92675/54802/51010/79979/8846/8270/55644/348180/129450/51654/55699/833/56931/54517/55226/80745/27304/1787/112970/25973/113179/9330/51067/79828/5917/131965/51002/123263/10556/11102/124454/2193/16/55152/126789/55621…	179
BP	GO:0031503	protein-containing complex localization	151/16611	155/18800	3.79124e-05	0.000455032	0.00030333	4983/201134/5899/3690/472/4117/4884/55333/9211/1627/59283/79809/5590/3208/91828/10142/1948/4092/50632/55081/57576/22871/27067/7014/117178/23237/4869/26146/22858/11020/79989/388336/6809/9742/6059/6103/7305/166379/5906/6616/23557/161424/8636/90332/6421/89891/3800/7430/7127/3798/254263/56850/55781/3265/27020/9903/9912/403/55737/57554/22883/10082/23212/56899/8943/5813/51304/51068/7514/1739/2693/1605/…	151
BP	GO:0006757	ATP generation from ADP	82/16611	82/18800	3.8139e-05	0.000455032	0.00030333	57103/195827/55526/9759/2819/387712/2645/2203/51422/6774/8473/7167/3458/2023/53632/4967/5313/402/2033/4609/51085/3098/3607/26471/2027/26137/5563/5315/221937/441531/669/5213/54541/80201/8671/3091/230/9611/5465/5663/351/28964/5224/11277/6521/229/26330/221264/5232/3692/5571/3630/339123/405/2026/5562/5027/3643/11182/5214/5207/89/863/5223/2584/83440/3099/226/2821/5211/51548/51341/3356/55753/5236/3101/…	82
BP	GO:0031669	cellular response to nutrient levels	205/16611	213/18800	3.81857e-05	0.000455032	0.00030333	10631/440738/10919/51520/84557/5899/3178/1277/55062/2242/57535/9607/3600/55630/10325/8131/3170/23411/3162/79726/4330/1981/3920/389493/643246/2621/7486/84219/81788/51422/154743/7378/11337/11345/51100/1026/10533/28960/220441/9463/2308/168620/27327/7421/1965/7248/8897/53632/25828/25959/7494/10514/56270/9681/5595/5292/54361/3428/23274/5366/150094/120892/4654/26263/5251/9024/64121/9891/58528/10991/440…	205
BP	GO:0006986	response to unfolded protein	136/16611	139/18800	3.8217e-05	0.000455032	0.00030333	55741/23645/23471/10956/871/7466/3315/7060/3308/84919/26270/1311/8720/5295/79094/3310/79139/4189/7009/666/80279/118424/168620/10399/1965/11153/4690/51360/7494/5770/91319/10133/2033/23190/25822/8988/64764/7415/3320/51768/467/51182/10018/23376/3336/10488/3303/3329/5071/5610/92305/84236/267/4780/3313/135138/55829/10987/79956/101928527/9217/64224/90993/7873/27348/10551/26291/9451/51009/80267/26608/20…	136
BP	GO:0009582	detection of abiotic stimulus	136/16611	139/18800	3.8217e-05	0.000455032	0.00030333	79054/9033/1040/55584/285331/346007/57010/3000/778/79823/5158/23746/56925/7287/6863/6869/8989/3736/409/6247/5961/2793/3249/5311/23596/2898/134/23621/2780/4923/80036/2047/79955/7442/1258/9780/7852/9311/10886/1301/58473/5132/796/123041/6010/7222/51761/23349/7273/83862/5146/2978/8195/9293/7439/8557/25861/1499/6387/5310/2767/117531/50508/1000/2986/494513/93589/2779/3815/2792/728458/6011/101060233/206…	136
BP	GO:0019827	stem cell population maintenance	136/16611	139/18800	3.8217e-05	0.000455032	0.00030333	10413/56478/84678/7101/27097/1977/4848/1656/6688/79648/84376/23160/22882/6944/80306/8320/6774/182/2103/80312/607/2308/79692/7004/9968/123169/6659/5764/657/8091/90390/8243/6939/23168/5396/8820/2255/5894/4609/57167/2648/53918/5460/7178/6657/9314/79576/8861/79918/5978/8202/6926/678/10001/9412/1994/55818/10642/4041/129563/1499/55183/6662/7849/339345/2177/23318/55124/23019/655/2176/79923/6497/51586/81…	136
BP	GO:0048813	dendrite morphogenesis	136/16611	139/18800	3.8217e-05	0.000455032	0.00030333	7162/29882/51225/54942/51473/9820/7101/4205/26258/57498/1627/23098/23181/1826/51265/23316/7224/7533/11178/50488/4076/2932/54664/85442/84062/2043/3251/3397/8301/10371/6383/22871/27067/23237/2047/4776/55619/100528062/26259/6792/5911/10507/5764/10013/10611/8829/10196/1136/120892/9344/577/1942/79791/23363/4133/3688/10458/85358/9912/80725/547/25830/10152/7337/25791/9201/50944/7804/10642/23543/23542/55…	136
BP	GO:0006479	protein methylation	192/16611	199/18800	3.84866e-05	0.000455698	0.000303773	51111/4837/10919/94104/23463/9545/284058/55693/80204/23411/79823/4302/54904/54790/55904/55209/7469/54554/55352/2107/11108/23067/3054/63976/7468/29072/26038/51409/8473/59336/200424/150572/5926/80312/79091/57673/84148/11091/221143/340602/80335/283742/751071/11137/23168/56950/151194/10196/23028/4204/1786/84661/9739/63925/11105/55870/9682/7936/4089/79918/26097/196541/9070/3275/64324/23512/7403/6839/5…	192
BP	GO:0008213	protein alkylation	192/16611	199/18800	3.84866e-05	0.000455698	0.000303773	51111/4837/10919/94104/23463/9545/284058/55693/80204/23411/79823/4302/54904/54790/55904/55209/7469/54554/55352/2107/11108/23067/3054/63976/7468/29072/26038/51409/8473/59336/200424/150572/5926/80312/79091/57673/84148/11091/221143/340602/80335/283742/751071/11137/23168/56950/151194/10196/23028/4204/1786/84661/9739/63925/11105/55870/9682/7936/4089/79918/26097/196541/9070/3275/64324/23512/7403/6839/5…	192
BP	GO:0042254	ribosome biogenesis	289/16611	304/18800	3.84875e-05	0.000455698	0.000303773	3669/6230/84128/6234/285855/5036/55636/26574/25983/10607/51602/9790/6227/6165/51187/83939/26149/23160/4839/10199/22894/6229/4736/83732/11340/55695/63899/10528/54663/51018/25879/11103/6147/55813/4869/55052/56342/79863/57050/113000/51010/84864/9188/64745/27292/7248/54555/84365/9221/6059/401466/4931/10514/54433/65095/11137/6208/8568/90441/8886/55226/8602/51116/161424/112479/55759/28987/50628/117246/…	289
BP	GO:0010811	positive regulation of cell-substrate adhesion	120/16611	122/18800	3.85785e-05	0.000455928	0.000303927	1295/255743/916/56477/2013/6385/2039/8631/6239/5155/55612/285613/2523/7422/25/1399/3675/5590/2185/2932/1842/3678/91663/3717/2335/1236/5034/55604/4852/6281/4192/3491/2294/2041/3987/6237/1758/246/7248/10979/5879/3791/201294/2243/4653/10675/402/10085/8829/54361/811/54453/1021/6366/1307/3611/136227/8874/9448/57091/1435/5795/5212/57669/1012/335/1605/948/2244/6789/26073/7402/1601/6376/4088/3273/4680/10…	120
BP	GO:0000075	cell cycle checkpoint signaling	165/16611	170/18800	3.87211e-05	0.000456765	0.000304485	57805/79858/1263/472/51776/9656/51343/51720/26270/5514/26058/5347/80279/57646/8379/54908/1026/988/84126/9587/8091/55743/1027/7272/60561/7919/7756/9344/197342/54465/7508/79791/51322/51065/5883/4582/6118/25906/8555/11130/1112/26272/9575/10459/65123/163859/2177/5371/11200/57551/51499/56984/54888/58493/90381/8738/6154/7158/27183/4193/7157/51514/348654/9577/1432/1111/144715/11277/990/324/29935/65975/4…	165
BP	GO:0050817	coagulation	217/16611	226/18800	4.02935e-05	0.000474435	0.000316264	5154/5327/10630/1465/10451/4627/5624/5265/1281/5359/710/2152/6288/308/5329/22915/1192/170692/8323/5054/640/3690/5873/84034/4846/6714/2039/5321/2191/958/60/947/26258/3170/7454/5155/5777/83706/10627/89781/7450/7056/959/57834/646960/3315/966/2621/2192/5328/3043/6850/928/5023/2623/1311/5345/5580/84062/3717/8525/2335/5196/3818/29071/10544/4067/3848/4352/23657/151/3827/3572/725/7980/8526/6403/7410/152/…	217
BP	GO:0032259	methylation	355/16611	376/18800	4.07708e-05	0.00047917	0.00031942	51111/4837/196410/10919/7490/94104/23463/11185/339175/9545/284058/113802/55693/4234/2593/10269/80204/11180/23411/79823/4302/54904/25962/5409/133383/54790/11022/55904/143689/6688/55209/7469/54554/79730/57683/55352/4839/2107/11108/23067/84944/3054/56978/6894/63976/7468/221078/29072/26038/51409/154743/8473/3070/55695/59336/84705/200424/63899/51531/150572/5926/55729/728464/80312/639/79091/9836/57673/…	355
BP	GO:0031058	positive regulation of histone modification	102/16611	103/18800	4.09737e-05	0.000480667	0.000320418	94104/284058/8986/472/23411/54904/7422/55904/122953/7469/9733/51043/3054/8473/187/10865/80312/195814/84148/65018/11091/11143/26993/93624/23168/5595/23028/4204/1786/120892/2648/7936/4089/6871/26097/2332/9252/6839/4582/3670/402569/56848/1499/1025/55183/604/10270/55124/1789/221477/3009/55683/5252/7157/3622/2641/10445/1487/10856/63946/26053/56979/23558/9646/23378/100129583/59335/6591/23476/84656/5587…	102
BP	GO:0050770	regulation of axonogenesis	150/16611	154/18800	4.1897e-05	0.000490595	0.000327036	29882/6696/81565/4099/8482/140578/51393/1627/23129/7504/7422/1826/51265/7224/2932/6900/6091/51199/9353/2043/1946/1954/2335/11344/6049/9856/9723/10371/6405/4131/627/5802/6792/7143/10507/7474/23303/8829/4747/6585/4137/9024/23654/5604/26230/57142/1942/4133/223117/1630/57611/5062/57698/374946/6259/55558/10505/10501/8831/5364/6387/91584/57689/6092/1600/5454/2909/3897/4803/23105/1000/5663/2664/5728/204…	150
BP	GO:0050708	regulation of protein secretion	241/16611	252/18800	4.2011e-05	0.000491028	0.000327325	3552/6288/54209/9607/640/2822/7226/23086/91543/23607/406/64285/3170/7447/3993/91355/285381/8111/4826/5106/6352/80024/3783/7424/388581/2645/8398/64215/7042/415116/4825/10972/3717/1946/4843/6755/5007/5481/1268/57818/2281/10961/3458/25874/9463/6833/3123/2696/6717/6659/7097/7099/81285/5950/54795/240/2243/5467/3172/8736/5122/6934/4988/10802/6616/43/57555/64083/23409/3593/90007/2852/9024/134957/7430/38…	241
BP	GO:0006997	nucleus organization	135/16611	138/18800	4.24074e-05	0.000493848	0.000329205	5253/6683/10269/81565/23411/26108/8444/4033/23399/29082/5347/26038/9519/9403/4926/79607/57673/57097/10783/9631/26993/9221/55746/5819/84942/2852/79643/91782/83983/5579/57142/51280/221496/3148/8815/23760/6839/6223/55818/7329/23165/7142/164684/25909/124491/6733/4928/3020/1639/5620/10436/5371/128866/1104/5339/57122/23353/25777/55135/27183/50511/51652/51510/1760/1111/27348/23175/57132/23345/23306/2010…	135
BP	GO:0007266	Rho protein signal transduction	135/16611	138/18800	4.24074e-05	0.000493848	0.000329205	5924/10630/4983/10395/1281/9411/57381/4233/8477/7454/55333/25/185/10211/3675/6091/57449/84636/57493/10161/397/1278/152015/27334/2059/29984/10256/27/388/64283/9475/613/5879/25959/1902/4653/2828/5894/8829/8452/137735/148170/398/9826/9002/9138/3688/148/157285/347273/10928/387/23365/345/3925/57698/5923/56990/51495/2843/9750/1012/604/8727/335/2840/2909/9639/396/4650/394/2149/79574/23580/65078/5741/928…	135
BP	GO:0016482	cytosolic transport	164/16611	169/18800	4.26397e-05	0.000494745	0.000329802	4478/6272/11151/55062/2013/64145/6714/150368/10228/83547/1066/3916/84376/55614/738/253725/55773/5987/387680/23258/10749/404636/55207/55297/10652/29911/254122/7874/5595/653440/23085/64400/120892/9527/7805/9581/8218/7430/5604/83874/3798/9367/4133/9066/112936/144717/219931/54551/29886/9482/51272/547/1213/8724/9341/5071/55737/79585/5289/22853/79735/51699/9905/23011/1639/84084/51560/374403/57533/5870/…	164
BP	GO:0030041	actin filament polymerization	164/16611	169/18800	4.26397e-05	0.000494745	0.000329802	9113/11151/7408/54942/7114/2039/93663/7454/822/23242/1627/51429/25/2934/51019/54961/2185/146206/55971/9353/5580/253725/9051/9873/91663/253260/3717/830/832/79822/51466/11344/1236/55604/79778/3059/9050/2059/9026/343578/3071/163782/246/64857/5879/4690/54434/6840/51734/829/585/4868/9168/56203/286527/148170/1730/382/375189/89848/10677/11013/80115/6366/442721/10565/10458/29766/387/3055/8195/64223/79585…	164
BP	GO:0048675	axon extension	119/16611	121/18800	4.30227e-05	0.000498281	0.00033216	214/29882/3913/6586/81565/4099/8482/51393/1627/7422/1826/51265/25/7224/2932/9353/4825/1954/2335/11344/6049/9856/9723/10371/6405/4131/5802/6792/7143/343472/10507/7474/8829/6585/1808/4137/150465/57142/3320/4133/223117/3688/57611/80208/9201/57698/374946/6259/55558/10505/10501/23011/6387/91584/5532/1906/3897/203228/8828/2664/5458/1909/65059/8239/65078/1855/348/26053/27185/1982/9037/8408/80128/10512/1…	119
BP	GO:0006096	glycolytic process	81/16611	81/18800	4.31896e-05	0.000498401	0.00033224	57103/195827/55526/9759/2819/387712/2645/2203/51422/6774/8473/7167/3458/2023/53632/4967/5313/402/2033/4609/51085/3098/3607/26471/2027/26137/5563/5315/221937/441531/669/5213/54541/80201/8671/3091/230/9611/5465/5663/351/28964/5224/11277/6521/229/26330/5232/3692/5571/3630/339123/405/2026/5562/5027/3643/11182/5214/5207/89/863/5223/2584/83440/3099/226/2821/5211/51548/51341/3356/55753/5236/3101/2597/52…	81
BP	GO:0021675	nerve development	81/16611	81/18800	4.31896e-05	0.000498401	0.00033224	3213/1889/55636/4884/3212/3198/494470/5582/3737/10371/6405/2047/627/4902/1258/55959/497189/3200/3211/8829/401/123041/3611/2065/4908/89797/3670/4821/51804/55558/8929/1499/4909/91584/57007/23213/1906/5457/1605/91137/23405/4803/8828/1909/5979/140947/5270/4762/9935/6299/84233/10370/2131/200933/10939/4914/5076/5459/1141/84189/6507/3280/3676/7412/2561/2048/6899/644168/10312/2737/220202/26018/6152/9860/…	81
BP	GO:0050920	regulation of chemotaxis	216/16611	225/18800	4.39143e-05	0.000505848	0.000337204	3627/5919/7130/8740/23075/2152/7162/54209/6504/5054/972/4233/7114/8482/5155/5880/729230/6352/646960/7422/1826/80024/6688/3315/1845/2358/7060/2621/727/7424/2185/1230/6091/57175/9353/56833/6347/6846/1948/3146/1233/1954/1803/10716/1236/114609/3965/9723/10371/2277/6405/4192/64094/56670/79890/4067/5025/3071/7852/27202/10507/6809/5764/4681/3576/5879/7474/100528032/3791/5595/2255/8829/1436/6585/811/5740…	216
BP	GO:0006979	response to oxidative stress	407/16611	433/18800	4.47621e-05	0.000514684	0.000343094	3552/51384/493869/7471/6778/84557/7703/2730/1277/2643/54209/1263/1728/8061/761/4233/4846/6714/253827/7226/1571/55294/6188/406/1545/1421/4318/10105/5074/23411/3162/11235/2539/358/10516/26287/10636/25/26034/6648/140885/11035/5742/3240/1827/3315/6869/11030/51314/8989/7486/2185/29957/3043/84919/1137/4779/135112/2530/132864/375748/5831/6414/5445/9124/4314/5580/6772/4841/10218/3717/5603/5311/27429/8737…	407
BP	GO:0006109	regulation of carbohydrate metabolic process	177/16611	183/18800	4.52831e-05	0.000518801	0.000345839	4837/80183/5165/7262/2822/57103/5724/6714/5509/195827/10269/3170/5155/23411/648791/9759/32/2819/2185/388581/2645/2203/2932/5031/51422/6774/8473/5167/1196/4923/51744/3458/5903/2308/8445/3481/3269/5500/5507/11091/11266/89801/10447/7874/402/2033/4609/5366/5745/150094/9852/90007/2852/2648/283871/51085/4790/3607/140710/114897/5164/26471/26137/55512/5563/1213/221937/117/5071/5163/1950/208/3953/54541/29…	177
BP	GO:0048469	cell maturation	177/16611	183/18800	4.52831e-05	0.000518801	0.000345839	29842/2069/30812/3600/9985/163175/860/718/83853/712/2539/7422/11022/116369/64581/2185/11144/6900/26468/4880/4825/23774/152015/695/9463/168620/7855/132141/2697/3791/429/4653/6196/994/23028/4204/59277/5745/120892/26256/54763/3202/11057/10481/30813/8399/8578/1050/577/6366/11334/23424/23787/2629/596/6406/2038/1499/126668/1738/79084/30819/257044/3169/23318/2056/9991/6911/1906/3091/5139/342618/51441/55…	177
BP	GO:0060491	regulation of cell projection assembly	190/16611	197/18800	4.61329e-05	0.0005275	0.000351637	10413/7471/79874/51225/1969/54942/642273/51473/6714/2039/7226/26051/4117/81565/7454/79598/23242/5880/1540/3383/5420/10096/2932/146206/5295/23433/9353/5580/9662/832/51466/11344/1236/64422/2059/8814/22871/27067/6792/9148/49856/23224/10807/225689/23603/51364/9001/9742/5879/9513/54443/585/2823/8829/64284/653464/148170/7401/5064/79647/382/10806/10677/857/117177/6366/55835/2332/3265/989/10198/9912/1015…	190
BP	GO:0009100	glycoprotein metabolic process	364/16611	386/18800	4.6208e-05	0.0005275	0.000351637	11227/9953/115290/11061/81031/64377/29906/55741/2528/2591/3600/93010/81618/8693/10206/26574/337876/6482/114805/3718/23333/11236/5074/57134/56913/64579/144245/633/2523/55757/6048/160418/54790/51172/6184/129807/2218/11320/79796/11226/283464/2530/2623/26270/22822/9951/650/83857/5806/160335/10678/84061/56999/55858/2527/9653/56548/374907/8473/200424/1236/266722/29071/26232/2650/256435/440138/1514/8031…	364
BP	GO:0032434	regulation of proteasomal ubiquitin-dependent protein catabolic process	134/16611	137/18800	4.70502e-05	0.000536154	0.000357406	57805/3077/1263/23429/11011/10134/6613/1454/1191/819/8312/9604/2932/51343/127544/143941/5347/6599/10221/8473/4092/56893/11337/5887/26259/6872/10399/255488/51035/55743/150684/153769/7874/120892/26263/1050/857/7415/90637/51322/11315/29979/7917/23376/3303/5071/2629/23640/6135/9683/131377/4534/10425/10755/2931/4780/55872/7514/57761/122809/344558/4193/1601/79699/2272/85409/5663/9097/64326/1453/51377/8…	134
BP	GO:0002702	positive regulation of production of molecular mediator of immune response	118/16611	120/18800	4.79727e-05	0.000545689	0.000363763	51111/3566/6778/10417/26191/6504/972/8764/1653/91543/958/54537/8482/23411/8741/3133/5590/64581/117854/1604/10859/7468/8809/23529/4189/10865/8013/114548/388325/79915/51744/4292/51010/7293/942/9188/7037/25818/7855/144811/567/7474/7494/7099/5950/149840/7805/3098/116449/3805/8915/3605/112441434/11331/57506/6885/56848/84787/5336/55183/10459/7189/948/11126/7158/3596/2865/64127/3815/354/112744/4436/5694…	118
BP	GO:1902117	positive regulation of organelle assembly	80/16611	80/18800	4.89086e-05	0.000555344	0.000370199	4478/5899/55062/57535/6714/6385/4848/57472/2932/9908/9662/7984/51100/4926/49856/10807/225689/9924/51364/9001/585/85459/255967/64112/55835/989/387/22930/55704/3936/6624/153241/23019/10801/10015/55329/2909/29899/221908/3064/57787/53407/401548/10733/50807/9738/80199/1437/23636/9525/8723/163786/10615/8408/11152/3567/9696/8678/22873/23300/23130/1778/10146/6491/112574/79734/25782/90678/5305/158297/5137…	80
BP	GO:0006839	mitochondrial transport	176/16611	182/18800	4.97003e-05	0.000563329	0.000375522	90529/10449/6548/84709/10134/55294/4884/10105/5880/89781/637/79594/815/56947/4285/29957/3308/2139/2932/788/27429/51100/79778/666/84134/9026/160140/118424/387990/1376/92609/56993/89839/8326/65018/89941/7855/26517/291/100652748/10651/9868/5018/253512/5366/120892/23409/706/1375/1459/28978/117145/3320/51025/64112/9804/55288/598/9520/27113/10018/3303/293/3329/5071/55737/596/7323/9016/100463289/10055/2…	176
BP	GO:0006403	RNA localization	189/16611	196/18800	5.04951e-05	0.000570308	0.000380174	10643/54830/3178/10644/472/7538/9961/22794/10575/130132/51602/4600/8570/8106/677/10211/84271/1069/4641/10073/8658/9908/24148/23144/26019/29072/23299/54890/7048/9818/23237/6428/5903/387990/4869/54847/57097/144983/9631/57510/3181/3837/7248/26993/908/25946/84324/23049/9284/55746/636/7919/55421/7528/65110/3800/10762/8607/3267/9804/26097/10574/65083/23511/2332/11097/7263/2091/23293/10482/29974/6830/10…	189
BP	GO:0009566	fertilization	189/16611	196/18800	5.04951e-05	0.000570308	0.000380174	5104/5327/10919/4627/151056/9985/7026/9898/10575/6674/11022/3074/1399/27443/4033/10184/928/84944/25932/53340/57095/152015/317719/283629/338/23627/27120/132141/146378/2352/122402/284680/203102/1047/89766/668/442868/153218/5819/7784/91646/136242/55870/11057/8399/10497/7222/2054/4089/26206/148281/11315/598/10574/10426/85413/8912/203074/10007/340069/7337/135927/10361/4184/480/7455/8852/7142/8546/1646…	189
BP	GO:0006626	protein targeting to mitochondrion	100/16611	101/18800	5.16026e-05	0.000580612	0.000387043	84709/10134/55294/5880/89781/637/56947/4285/3308/27429/51100/79778/84134/160140/118424/387990/92609/56993/65018/7855/26517/100652748/9868/120892/23409/706/1459/3320/51025/9804/9520/3329/5071/7323/10055/10425/728489/83943/2931/54543/9049/51079/130916/59286/10245/26521/10452/9141/100287932/10531/8314/25793/26515/26519/23203/9530/3305/131474/3998/10469/10456/58480/5562/55823/134266/9512/55072/29928/…	100
BP	GO:0008630	intrinsic apoptotic signaling pathway in response to DNA damage	100/16611	101/18800	5.16026e-05	0.000580612	0.000387043	57805/1969/9641/972/842/51246/79073/472/6188/23411/637/3162/1191/25/6648/597/7132/602/84944/7133/5295/27429/51616/666/57646/79915/1026/4292/4776/1032/8445/25946/2033/3428/10017/23028/2810/7178/64112/51065/5883/598/26471/7917/10018/4582/3090/596/29965/54541/6387/57007/55031/5371/11200/51499/1396/204851/6154/7157/22954/3622/57600/675/4282/6498/220042/1869/6591/7161/51588/4170/54929/64782/28996/2956…	100
BP	GO:0060538	skeletal muscle organ development	162/16611	167/18800	5.16808e-05	0.000580612	0.000387043	4223/63950/445/221662/7490/30812/84466/7093/10791/1134/1674/7026/406/7504/23764/858/245806/1827/10211/59269/64220/56603/3679/26508/53834/3142/8320/64208/57190/9328/150572/607/4209/2047/90/22953/29895/3481/9148/1073/11023/51676/10324/6840/668/2033/4868/844/56203/11149/4654/26263/246329/6261/3344/79647/10869/857/5307/196541/26471/58/221496/6664/9975/3131/467/2876/3164/387/2817/101929726/596/1756/51…	162
BP	GO:0009581	detection of external stimulus	133/16611	136/18800	5.21936e-05	0.00058534	0.000390195	79054/9033/1040/55584/285331/346007/57010/3000/778/79823/5158/23746/56925/7287/8989/3736/409/6247/5961/2793/3249/5311/23596/2898/134/23621/2780/4923/2294/80036/2047/79955/7442/1258/9780/7852/9311/1301/58473/5132/796/123041/6010/7222/51761/23349/7273/83862/5146/2978/8195/9293/7439/8557/25861/1499/6387/5310/2767/117531/50508/1000/2986/494513/93589/2779/3815/2792/728458/6011/101060233/2063/611/57053…	133
BP	GO:0034765	regulation of ion transmembrane transport	446/16611	476/18800	5.2758e-05	0.000590629	0.00039372	6769/3627/5924/54102/779/4283/6373/23630/1192/11151/54209/930/8645/219527/805/2745/9022/287/6548/56704/5724/79073/57817/7114/140738/23704/967/55636/1187/79041/4318/5777/10105/338440/778/90134/255022/144245/2539/729230/59283/25/81671/10268/7533/3783/3769/65267/2185/50488/53827/8398/5023/3736/9747/5349/3208/25932/6328/5031/5999/482/10142/389816/6347/5311/9368/823/8737/170850/187/3737/54997/57190/15…	446
BP	GO:0045471	response to ethanol	117/16611	119/18800	5.34853e-05	0.000596675	0.000397751	10919/841/1728/761/57817/2806/1571/2903/6279/2539/6648/6869/2185/9076/5999/4880/1621/847/2059/1268/2263/10287/6000/4986/4609/4988/551/3066/4255/2550/130/3709/6554/2902/9965/116443/387/117/5914/10213/329/1440/3596/2904/5465/1365/2742/2796/6915/867/6517/5741/498/5581/131/3158/3558/7284/939/3952/9962/8431/113/54658/5562/983/7054/1788/94241/1813/6531/1141/6720/3747/5019/595/18/1815/1393/5423/7412/100…	117
BP	GO:0051928	positive regulation of calcium ion transport	117/16611	119/18800	5.34853e-05	0.000596675	0.000397751	6769/3627/3958/4283/6373/930/805/287/6548/4638/51393/3718/5155/2539/6352/25/815/81671/10268/7466/65267/5023/353514/1230/409/5031/6347/5311/187/11027/3060/6262/4923/7220/22953/5025/162514/6717/9001/2847/57165/844/706/246329/2852/342667/9446/9002/7222/57620/857/9914/10345/781/2902/387129/117/6351/9472/57158/5354/56848/6387/5336/2147/783/3596/6376/2946/2641/7225/3064/5026/9992/2149/6348/5170/5335/30…	117
BP	GO:0099177	regulation of trans-synaptic signaling	404/16611	430/18800	5.44421e-05	0.000606287	0.000404158	5924/5327/4983/10288/84885/2171/2897/29882/64101/22943/5552/760/6714/55784/23140/29/2903/7101/56729/3908/4884/6547/1395/9211/57282/1627/1977/5021/729230/59283/10636/8564/25/23316/815/7533/10211/6869/91683/5590/6865/2185/11178/22854/8398/2932/6900/2906/5023/409/5582/5999/10142/6347/84062/3717/2043/2898/8525/6857/134/2917/2900/23154/3060/23621/9145/9498/1268/4131/4355/22871/27067/23237/2047/627/477…	404
BP	GO:0045619	regulation of lymphocyte differentiation	175/16611	181/18800	5.4539e-05	0.000606306	0.00040417	259307/84524/3566/10288/914/941/3122/3659/972/3600/246778/64332/861/5896/84695/22806/8651/3718/5777/6777/10875/11221/1960/3635/729230/3575/1493/25/677/5590/2621/6932/864/6850/54542/9308/10385/51043/22890/56603/7704/84433/1209/149041/3142/56833/257101/3146/4092/6935/23240/7048/3965/9840/64115/114548/4192/7535/639/695/3707/3662/3458/8767/8808/3071/3123/942/6659/8876/399/4323/146850/3624/7494/2302/3…	175
BP	GO:0051216	cartilage development	188/16611	195/18800	5.52601e-05	0.000612186	0.00040809	1116/3213/8840/7076/1281/11061/1277/2202/4781/2822/861/3696/55553/860/2487/10269/633/871/864/1311/7704/4090/650/4880/4092/10865/6935/7048/340419/57326/4192/4209/3491/2261/25884/657/8091/55959/1301/11173/7474/4094/3200/5595/5396/8692/4256/144347/5745/51222/23314/57560/2648/3202/653/7477/7045/64764/85301/5307/4322/1280/2734/651/55512/55790/1746/26585/8195/1513/7067/4146/8817/2690/1499/7482/6662/531…	188
BP	GO:0120032	regulation of plasma membrane bounded cell projection assembly	188/16611	195/18800	5.52601e-05	0.000612186	0.00040809	10413/7471/79874/51225/1969/54942/51473/2039/7226/26051/4117/81565/7454/79598/23242/5880/1540/3383/5420/10096/2932/146206/5295/23433/9353/5580/9662/832/51466/11344/1236/64422/2059/8814/22871/27067/6792/9148/49856/23224/10807/225689/23603/51364/9001/9742/5879/9513/54443/585/2823/8829/64284/653464/148170/7401/5064/79647/382/10806/10677/857/117177/6366/55835/2332/3265/989/10198/9912/10152/55704/6624…	188
BP	GO:0006970	response to osmotic stress	79/16611	79/18800	5.53846e-05	0.0006125	0.0004083	362/1263/5971/366/624/4638/60676/358/54206/8564/677/65267/23308/2185/9076/5603/5311/361/9053/836/5269/83959/57468/9221/10367/551/2326/706/9990/79085/9943/6513/5609/51719/6558/389015/2056/6870/7157/553/6517/27347/5170/91862/81628/80303/231/825/1831/7054/9181/3326/1654/3954/6652/59341/6326/55144/5243/1201/1386/3673/8531/581/5585/10725/7098/5743/80131/5020/3778/7520/7124/56262/84230/572/6750/92241/2…	79
BP	GO:0005996	monosaccharide metabolic process	249/16611	261/18800	5.76748e-05	0.000635621	0.000423712	4938/4837/80183/100131187/2171/5165/7262/2528/2822/57103/55277/6714/5509/4886/10269/3170/23411/648791/64080/2519/2539/5106/2523/32/2819/388581/2645/2203/115209/2932/2530/11164/7355/5162/130589/2527/8473/5167/23324/5209/2517/7167/1196/57818/5903/80146/2308/8445/3481/5500/5507/11091/5239/2023/11266/89801/10447/145173/10690/7874/5950/5467/2033/4609/2526/5366/150094/9852/90007/2648/55276/283871/3098/…	249
BP	GO:0050730	regulation of peptidyl-tyrosine phosphorylation	249/16611	261/18800	5.76748e-05	0.000635621	0.000423712	5154/55024/83666/1489/916/5175/54209/2069/941/972/8764/3600/3690/6714/6464/2039/55294/958/9961/8651/5155/5777/54625/868/6352/54206/7422/25/7251/7060/5590/2621/64581/2185/30844/6850/7132/3678/353514/3689/2623/284/9021/409/100133941/5580/920/253260/3717/2043/1946/23529/134/22876/3059/5007/11314/1856/2261/4067/90/3458/8767/374/3481/9148/1270/10399/79705/10507/3572/5770/5753/2252/3578/2255/57732/8829…	249
BP	GO:0002367	cytokine production involved in immune response	99/16611	100/18800	5.79023e-05	0.000635927	0.000423916	10225/54210/684/3077/10417/6504/972/8764/1653/91543/8482/3718/23411/3162/729230/3133/5590/64581/117854/1604/10859/7133/284/7042/8809/4092/10865/8013/114548/388325/89886/695/336/9188/7855/144811/567/7474/7099/54795/7805/3098/116449/11213/3805/8915/1178/57506/6885/56848/5336/604/7189/335/948/9865/11126/2865/64127/3815/353091/4282/8140/9474/163486/3456/3440/7040/30009/975/2867/50943/148022/7292/7900…	99
BP	GO:0046939	nucleotide phosphorylation	99/16611	100/18800	5.79023e-05	0.000635927	0.000423916	122481/205/57103/195827/129607/55526/9759/2819/387712/2645/2203/26289/51422/6774/8473/7167/3458/8382/2023/53632/4967/5313/4831/402/2033/4609/51085/3098/4830/3607/26471/2027/26137/5563/5315/221937/441531/669/5213/203/54541/80201/347736/8671/3091/230/9611/5465/5663/351/28964/5224/11277/6521/4832/229/26330/221264/5232/3692/5571/3630/339123/405/29922/2026/5562/5027/51727/3643/11182/5214/5207/1841/483…	99
BP	GO:0050804	modulation of chemical synaptic transmission	403/16611	429/18800	5.80968e-05	0.000636965	0.000424608	5924/5327/4983/10288/84885/2897/29882/64101/22943/5552/760/6714/55784/23140/29/2903/7101/56729/3908/4884/6547/1395/9211/57282/1627/1977/5021/729230/59283/10636/8564/25/23316/815/7533/10211/6869/91683/5590/6865/2185/11178/22854/8398/2932/6900/2906/5023/409/5582/5999/10142/6347/84062/3717/2043/2898/8525/6857/134/2917/2900/23154/3060/23621/9145/9498/1268/4131/4355/22871/27067/23237/2047/627/4776/136…	403
BP	GO:0045637	regulation of myeloid cell differentiation	200/16611	208/18800	5.92821e-05	0.000648844	0.000432527	4057/7130/841/1051/54209/2242/9607/972/861/55294/1441/29909/7538/6988/128506/6777/8111/3635/4015/677/6688/11025/2185/121504/10859/2623/1230/7704/5295/171392/6772/920/10221/6774/8737/3665/23774/57095/54997/5196/4211/3059/182/3707/4067/3458/4352/3071/3123/3204/123169/11143/10234/26013/567/3624/7305/7099/60682/4609/2124/22985/7066/3149/7030/3593/3202/8359/634/5814/2551/1021/8861/2488/51561/3148/814/…	200
BP	GO:0006513	protein monoubiquitination	78/16611	78/18800	6.27177e-05	0.000682926	0.000455246	7703/23429/84678/5896/553115/7251/6737/2189/84108/56970/55906/81844/54926/1643/9148/123169/90025/25827/8452/84759/151636/648/51322/10016/5071/7323/7706/79596/55182/5193/80233/329/2176/55120/2187/1642/51514/29128/6015/84541/2175/9978/867/56852/199990/29089/9646/55658/79577/59349/4591/84333/54623/7320/55284/8454/165918/90933/8450/10075/64844/57697/84861/63893/2188/90850/2178/10210/54880/23295/7314/…	78
BP	GO:0033077	T cell differentiation in thymus	78/16611	78/18800	6.27177e-05	0.000682926	0.000455246	3552/84524/7471/916/972/5896/915/6777/3140/1960/917/3575/11035/677/3714/84433/1209/6935/1236/23240/9840/7535/3707/8876/7855/567/2302/54361/2064/2736/79576/1021/100/10125/678/814/2629/596/1499/29781/7157/8772/122706/64919/6469/5897/9935/8456/9474/23210/101/6868/3549/6722/50943/9760/80758/1235/5771/285282/8325/6647/2737/6654/6194/652/5591/9093/3981/3553/6655/8324/326/5788/1794/2625/6794/940	78
BP	GO:1903533	regulation of protein targeting	78/16611	78/18800	6.27177e-05	0.000682926	0.000455246	2039/54471/55294/5880/89781/56947/4641/9747/3689/3208/27429/3684/51100/79778/285966/160140/118424/65018/7855/120892/2064/1459/9520/3753/3265/2040/5071/7323/208/11261/10055/10425/5174/2931/54543/59286/2664/9141/8314/23255/3745/9530/3305/3998/10456/58480/5562/55823/10519/55072/22885/164153/6720/55486/123264/9776/54741/57214/125170/10075/6505/9531/93974/57602/288/6721/9847/2534/8851/665/377630/51024…	78
BP	GO:0014074	response to purine-containing compound	131/16611	134/18800	6.41992e-05	0.000697865	0.000465205	5327/445/779/1277/7490/8061/348980/3488/5724/2039/366/7226/196/1545/79041/2354/6263/7056/358/2819/677/2185/5023/2623/7184/5031/682/57657/10142/6772/5311/2627/6262/594/1261/22953/5025/374/7442/2230/6872/5029/54434/6528/5313/54795/845/159/5906/4724/23028/3066/6261/7430/7425/7222/3709/3753/6715/9472/3625/3767/5032/64805/329/5139/24145/2946/10411/87178/351/1111/4435/5026/5972/6546/5187/9693/2889/2990…	131
BP	GO:1903046	meiotic cell cycle process	199/16611	207/18800	6.46993e-05	0.000701402	0.000467563	150280/10919/4627/2069/55810/9985/472/164045/2827/11022/5885/10096/11144/10744/51343/84944/56603/5347/221711/400629/10734/11077/4292/245711/1325/225689/10111/1761/8900/150365/122402/7474/55743/57820/375337/23304/728637/6196/54361/994/9134/91646/7272/811/11105/7155/197342/147872/256126/80010/378708/10051/3619/100507650/7917/10018/130951/388649/10361/158401/7589/346673/283129/84690/63979/81626/2978…	199
BP	GO:0006165	nucleoside diphosphate phosphorylation	98/16611	99/18800	6.4965e-05	0.000701402	0.000467563	122481/205/57103/195827/129607/55526/9759/2819/387712/2645/2203/26289/51422/6774/8473/7167/3458/8382/2023/53632/4967/5313/4831/402/2033/4609/51085/3098/4830/3607/26471/2027/26137/5563/5315/221937/441531/669/5213/203/54541/80201/347736/8671/3091/230/9611/5465/5663/351/28964/5224/11277/6521/4832/229/26330/221264/5232/3692/5571/3630/339123/405/29922/2026/5562/5027/51727/3643/11182/5214/5207/1841/483…	98
BP	GO:0019233	sensory perception of pain	98/16611	99/18800	6.4965e-05	0.000701402	0.000467563	3552/2171/6548/5724/4886/2903/7432/729230/56925/6863/11343/6869/8989/1137/2906/3736/409/6347/3737/134/9536/23621/1268/4923/80763/2047/5025/7442/7852/9311/3231/5595/151647/84197/4986/4988/6336/4204/57555/85446/3593/4157/796/11280/23349/54463/56923/83862/60675/1636/6387/4985/1906/59344/3375/134145/4311/6335/2149/6348/2063/2695/8508/58503/26952/50801/1269/55800/10879/1910/59335/4914/2911/6323/5027/1…	98
BP	GO:0021510	spinal cord development	98/16611	99/18800	6.4965e-05	0.000701402	0.000467563	7471/5727/55553/84695/170825/57125/3226/4357/26058/55906/27152/5311/57147/5090/10215/8543/161357/9968/6659/2668/429/151449/4747/120237/6585/401/2736/167826/54567/1630/6664/6715/3670/7804/4821/374946/6656/5992/1639/5212/5310/2055/1600/10660/8646/7545/23500/58155/340260/64843/2636/79659/9580/26227/86/6469/2068/7289/57057/10220/26160/50674/89780/5080/58524/2624/5649/387804/89884/7436/79600/64211/872…	98
BP	GO:0006720	isoprenoid metabolic process	115/16611	117/18800	6.64575e-05	0.000715091	0.000476688	8228/5919/151056/54884/5947/7276/1571/1545/127/10577/9249/339761/59342/220/56603/2224/216/27429/340665/5948/23590/195814/5950/5467/1592/10196/51635/8854/79947/130/1562/54905/53630/285440/4597/6715/7804/5264/3991/2222/1798/8813/8694/4036/54600/1543/3156/57665/3422/54577/1544/57016/57107/158835/1577/729920/131/54659/3158/64577/54576/317749/8644/6121/57104/4598/10654/54658/124/9453/27235/441282/9173…	115
BP	GO:0042752	regulation of circadian rhythm	115/16611	117/18800	6.64575e-05	0.000715091	0.000476688	57805/3184/55294/5730/406/1454/5158/8553/5936/6096/83759/2932/5582/23239/92369/4841/23596/3737/134/6478/22871/10533/5500/9475/7874/153/3172/3062/55269/150094/6421/22992/463/26233/9975/54551/5563/6839/7337/64839/9575/55336/9572/5371/55124/10062/23373/2767/2146/4544/1642/7157/9500/1408/8863/7080/54850/5465/7071/1453/5602/8239/283807/2692/2063/5187/85457/8403/1437/8864/1814/139135/23291/9967/2475/26…	115
BP	GO:0032868	response to insulin	247/16611	259/18800	6.76511e-05	0.000726707	0.000484431	5919/6272/6431/2822/6548/64900/6714/6464/56729/81565/8651/376497/23411/9365/5106/54206/858/677/5590/388581/2645/2203/2932/4641/132864/51043/9021/5295/55971/23433/376267/6599/5580/6772/8473/9882/493829/5167/3645/847/2650/3030/3291/1176/4067/286753/8412/2308/6833/3481/27019/7248/4690/7097/7494/5770/55022/5313/4986/4609/7532/896/3638/2844/9852/55625/7425/5579/634/3416/8503/140710/64506/10458/5164/65…	247
BP	GO:0009615	response to virus	369/16611	392/18800	6.79468e-05	0.000728655	0.00048573	4938/3627/3669/10346/3437/57337/4939/83666/5359/60489/684/4283/10410/84166/5450/10417/8061/197259/9111/115004/26191/9641/2537/3659/3600/1653/100507436/246778/6714/3429/51311/3696/4940/10206/91543/10269/958/54765/2268/3660/2633/55718/8547/84282/10875/58487/23765/200316/4600/51257/1191/6352/6039/8638/79594/11035/85363/6737/3315/79844/11040/51284/10577/55337/81622/64135/117854/602/3964/9140/10859/10…	369
BP	GO:0035637	multicellular organismal signaling	159/16611	164/18800	6.88728e-05	0.000737344	0.000491522	1890/1829/23630/805/9607/287/6548/1134/23704/10269/4205/4099/6547/59283/489/125111/5023/3736/2702/6328/482/10142/2898/3737/6324/817/3060/476/6262/5350/6508/10008/7220/2281/3781/5025/7143/23114/6717/9631/2697/6327/1482/54795/3757/845/10242/492/551/6336/29119/8913/6543/2852/6332/491/11280/83700/857/775/10345/781/3753/2332/8912/81033/6330/2629/3670/3270/6334/157378/2257/27094/5318/783/5339/2693/1525…	159
BP	GO:0032729	positive regulation of interferon-gamma production	77/16611	77/18800	7.10211e-05	0.000757796	0.000505156	916/914/26191/6504/114836/3595/246778/51311/6556/729230/25/51284/3115/64581/602/10859/8809/3717/10865/3965/5987/51744/8767/7855/7474/100528032/7294/7099/7784/3593/84868/10125/51561/11118/10148/1054/3594/22914/3265/4049/3329/3670/80381/9466/11126/8772/5144/54106/282618/59067/3558/7297/8140/3592/149233/161882/57824/11119/51571/7292/5142/3394/29108/7098/2150/3105/54440/10666/56253/7124/23513/3113/92…	77
BP	GO:0072028	nephron morphogenesis	77/16611	77/18800	7.10211e-05	0.000757796	0.000505156	7471/255743/5727/7490/30812/3217/2719/7422/650/6772/5311/5087/3237/2668/54361/4609/4089/3611/26585/596/51804/1499/7482/6662/7849/5310/655/55366/1739/64412/7481/7475/2247/9500/65266/4435/54806/2066/84445/6928/2297/186/6943/55083/3207/6469/56998/6299/3911/130497/79192/5076/388585/3280/26249/2253/10736/153572/2737/7484/79191/652/2246/80000/9241/3975/6608/342184/2625/8642/183/6495/4070/2138/3976/5159…	77
BP	GO:0045664	regulation of neuron differentiation	185/16611	192/18800	7.23497e-05	0.000770682	0.000513746	30812/8835/3199/22943/56478/7101/389549/4099/1454/1977/8904/1656/1981/7224/7533/22882/2932/6900/55906/26508/650/6658/57540/4825/5087/6935/4211/6929/182/10215/4131/22871/6938/80279/627/23531/1270/90527/151/4681/567/152/51654/1482/429/151449/7532/1808/811/120892/85446/9682/463/23462/6657/54845/7732/5978/55079/6664/1746/4908/387/221938/596/60436/3670/4854/4821/3400/4760/8929/4909/238/6387/1840/6662/…	185
BP	GO:0002718	regulation of cytokine production involved in immune response	97/16611	98/18800	7.28822e-05	0.000772479	0.000514943	10225/684/3077/10417/6504/972/8764/1653/91543/8482/3718/23411/3162/729230/3133/5590/64581/117854/1604/10859/7133/284/7042/8809/4092/10865/8013/114548/388325/695/336/9188/7855/144811/567/7474/7099/54795/7805/3098/116449/11213/3805/8915/1178/57506/6885/56848/5336/604/7189/335/948/9865/11126/2865/64127/3815/353091/4282/8140/9474/163486/3456/3440/7040/30009/975/2867/50943/148022/7292/79004/3565/3135/…	97
BP	GO:0050773	regulation of dendrite development	97/16611	98/18800	7.28822e-05	0.000772479	0.000514943	29882/9820/7101/23242/1627/114788/23098/51265/25/23316/124925/7224/7533/1399/11178/4076/2932/54664/85442/2043/3397/9856/6383/29993/27067/4776/100528062/26259/6792/5911/10507/5764/84816/64284/1136/653/382/577/79791/23363/10458/1630/387/7804/5530/23011/238/51188/1996/4734/23373/655/64689/2146/1608/26012/5063/23072/9693/29904/23043/5789/1398/65981/10498/50674/153090/80823/5048/1141/991/5649/1523/743…	97
BP	GO:0150115	cell-substrate junction organization	97/16611	98/18800	7.28822e-05	0.000772479	0.000514943	10395/7205/6548/6714/6385/2039/7422/25/1845/87/2185/3678/5295/1946/2335/3655/6281/29984/2042/3987/23603/9475/613/4323/7248/10979/5879/3915/23332/3791/79834/57662/4653/8829/54361/9344/10391/8394/382/84962/8861/1307/1308/26585/8874/9448/387/5795/596/7094/57669/5339/26073/4088/3273/5728/55920/5786/22998/5796/2824/7010/123720/9748/6422/395/10580/7070/90102/51762/2017/7414/6093/10420/71/10982/51057/28…	97
BP	GO:0043406	positive regulation of MAP kinase activity	114/16611	116/18800	7.40646e-05	0.000783707	0.000522428	5154/1857/22943/6714/5871/958/6188/5155/11235/7422/8312/2321/2185/6850/8322/6091/100133941/2043/11211/7984/1856/10961/7855/146850/3357/7474/5770/7099/120892/2064/84962/23533/10125/10333/3265/5609/4908/4216/3654/177/10178/1950/8817/2690/6885/5608/6997/8654/7189/2322/1906/2146/221472/255324/64127/2247/9500/3815/5663/1991/8600/54106/2081/4254/4282/2688/1445/4217/5607/7039/153090/101/7040/5027/3643/2…	114
BP	GO:0045926	negative regulation of growth	234/16611	245/18800	7.44153e-05	0.000786112	0.000524032	4499/57805/9518/684/84722/29946/6696/5727/7490/8835/7093/5931/3488/2487/6586/4099/8482/51316/2719/11221/23411/84289/4489/2539/51265/79594/4496/85407/2203/4493/6494/7042/221476/9353/5999/5167/6597/6049/9856/7048/9723/10371/6405/2261/1026/5802/1032/8751/10743/7143/10399/10507/2023/2697/7474/3624/5950/5753/9868/153/5467/3172/8829/8692/1027/6585/29948/79960/7528/154/55840/57142/4089/56981/4133/223117…	234
BP	GO:0002683	negative regulation of immune system process	399/16611	425/18800	7.52307e-05	0.00079341	0.000528896	4057/259307/4938/84524/55024/7130/3566/10288/6778/3958/10225/1281/710/684/79679/3077/84166/1051/284467/54209/9111/941/26191/56477/6504/9607/3659/972/640/23170/8764/2213/100507436/6714/6385/861/55365/4940/472/4332/7940/196/55294/84695/9231/2268/54900/2633/8651/6988/3718/5777/5074/10875/11221/54625/3162/8111/868/3635/729230/259/3575/1493/79594/5133/3133/131450/6688/6737/1845/966/5734/727/11025/5272…	399
BP	GO:0099173	postsynapse organization	158/16611	163/18800	7.57651e-05	0.000797725	0.000531773	4983/10288/84885/51225/54209/64101/5552/2213/60/4884/4744/1627/23181/23316/1399/87/3675/4076/78999/84062/2043/4593/11079/6405/22871/27067/23237/2047/9419/55619/100528062/9463/6792/23657/8326/388336/2668/10013/7474/57497/10611/8292/8829/10196/4747/57555/120892/66000/382/1942/3556/10458/378/375/85358/51201/9912/80725/547/84628/10152/7337/25791/55737/91752/50944/7804/26045/6712/8831/22866/9378/1501/…	158
BP	GO:0010821	regulation of mitochondrion organization	144/16611	148/18800	7.60517e-05	0.000799421	0.000532904	10449/5329/54209/57103/84709/54471/55294/4318/10105/637/1191/79594/56947/115209/8398/2932/409/27429/666/9026/160140/8878/10715/8739/8326/65018/7037/89941/7416/7855/10013/8743/291/55022/3791/64423/638/2033/6773/551/5366/54708/120892/64083/706/4137/2852/1459/28978/64112/55288/11315/598/27113/10018/10645/10059/2876/3303/293/10928/5071/55737/23400/219736/2931/51499/4976/3091/30968/3375/2021/57048/808…	144
BP	GO:0045216	cell-cell junction organization	197/16611	205/18800	7.70222e-05	0.000808289	0.000538815	1829/1004/5175/1969/137075/1495/287/6714/421/60/9231/7422/83660/5583/1003/143098/125111/928/83605/4641/9788/2702/9076/9071/7042/57493/1948/2043/187/4092/143162/389/79778/51599/23136/9948/3987/24146/6833/9475/7855/51564/10979/2697/153562/57662/402/1436/57555/286676/1008/83700/56288/857/1010/5062/3801/3605/387/11187/1828/1006/6624/7094/64065/25861/1499/1636/389813/49861/1501/5318/222256/5339/10015/…	197
BP	GO:0043414	macromolecule methylation	313/16611	331/18800	7.83193e-05	0.000820549	0.000546987	51111/4837/10919/7490/94104/23463/339175/9545/284058/113802/55693/4234/10269/80204/11180/23411/79823/4302/54904/25962/54790/11022/55904/143689/6688/55209/7469/54554/57683/55352/4839/2107/11108/23067/84944/3054/6894/63976/7468/221078/29072/26038/51409/8473/3070/55695/59336/84705/200424/63899/51531/150572/5926/55729/80312/79091/9836/57673/9463/84148/79979/8932/346171/11091/221143/340602/27292/12240…	313
BP	GO:0035725	sodium ion transmembrane transport	171/16611	177/18800	7.89465e-05	0.000825762	0.000550463	9033/2745/6548/348980/7226/6547/57282/80024/7533/65267/53827/5349/6328/57657/479/482/5311/9368/54997/6324/817/6524/476/9498/57835/83959/9311/6557/6533/6327/150684/5774/54795/53373/6336/6540/8913/6543/6550/6332/6539/55117/123041/11280/483/57030/53826/219931/8912/2040/6330/6337/285335/1756/480/6334/6520/11261/196527/2257/6558/496/65268/389015/4734/8671/10786/1739/7402/357/53822/65266/64078/26504/65…	171
BP	GO:0051701	biological process involved in interaction with host	184/16611	191/18800	7.91205e-05	0.000826226	0.000550772	10346/23601/5359/3956/10410/1969/941/6504/972/8764/3690/6714/1234/8547/55065/2519/4684/2934/858/85363/185/7251/6737/3916/2621/3383/286827/117854/1604/3678/29082/9076/10581/682/5806/8673/920/10475/1948/5034/91392/3695/3965/5481/4261/1514/5987/2838/1508/2219/3685/10533/9830/3123/55207/7293/7852/942/7037/3576/53373/8829/5819/81559/8692/551/7919/79643/91782/857/3416/3688/23265/598/51193/219931/6554/7…	184
BP	GO:1901293	nucleoside phosphate biosynthetic process	245/16611	257/18800	7.92975e-05	0.000826718	0.0005511	4837/196883/83666/1635/4199/122481/54898/54209/122622/205/5165/10861/4846/7114/129607/2987/3000/1723/84875/64834/23181/32/8564/79717/2618/27109/2180/26289/3208/4880/5162/5634/51422/7378/3251/31/4843/3735/9519/55312/136/25874/1854/2181/8382/65018/9061/2023/1836/23205/8942/65220/55022/5313/9524/4831/790/9200/4522/159/50484/349565/4609/51703/81616/10135/4830/7415/100/5164/109703458/102157402/347734/…	245
BP	GO:0010001	glial cell differentiation	209/16611	218/18800	7.98126e-05	0.000830729	0.000553773	80045/54209/30812/4781/163175/3913/55553/7101/4099/10319/6547/54587/11221/4919/170825/712/6279/1191/4664/25/10100/79809/2358/443/6900/7133/56978/2896/650/4825/2043/6774/4665/23529/55695/84504/666/10215/6280/4192/128853/58158/9948/4067/3458/9463/7223/1270/9968/7852/20/6659/5764/3572/7097/7099/429/5595/4653/10675/2255/3066/4137/9682/93377/2064/2016/5604/6657/56288/375387/1021/7431/7732/3611/6664/66…	209
BP	GO:0006635	fatty acid beta-oxidation	76/16611	76/18800	8.04233e-05	0.000833002	0.000555289	55268/33/10449/84129/32/27349/3030/56898/1268/1376/8309/1962/160428/5467/1375/549/10478/11001/26063/10005/208/55289/254013/23417/2108/2109/8660/3032/5465/3033/3028/205251/5191/1384/83752/3952/3712/5828/5826/38/2639/3667/1632/1892/83667/10455/3295/126129/37/6342/207/84879/39/23600/5830/2110/34/2168/1666/1374/1891/35/219743/7291/51/55862/30/215/8647/225/80724/5825/8310/9370/54677/440503	76
BP	GO:0008344	adult locomotory behavior	76/16611	76/18800	8.04233e-05	0.000833002	0.000555289	123803/163175/10269/1476/55636/3170/124925/6900/2906/409/26058/2043/27429/5090/22876/2059/4923/2668/7248/4204/57555/2019/127343/11315/7200/26090/9698/5071/5538/6623/4909/2257/57626/6387/4985/2055/1600/80243/2743/7545/1497/351/3766/2636/2695/340990/1182/372/1949/7111/22941/1813/6323/114781/3235/58524/5048/28996/2395/84189/23287/4864/1815/51286/7345/477/1267/4929/57731/3236/10752/55074/6622/2741/32…	76
BP	GO:0061333	renal tubule morphogenesis	76/16611	76/18800	8.04233e-05	0.000833002	0.000555289	7471/255743/5727/7490/30812/3217/2719/7422/9788/650/5311/5087/3237/8549/2668/54361/4609/4089/3611/26585/596/51804/1499/7482/6662/7849/5310/55366/1739/64412/7481/7475/2247/9500/65266/4435/54806/84445/6928/2297/186/6943/55083/3207/6469/56998/6299/3911/130497/79192/5076/388585/3280/26249/2253/10736/153572/2737/7484/79191/652/2246/80000/4208/9241/3975/6608/342184/2625/8642/183/6495/4070/2138/1282/170…	76
BP	GO:0048762	mesenchymal cell differentiation	233/16611	244/18800	8.06917e-05	0.000834425	0.000556238	51384/10630/114990/1277/6275/30812/25937/5308/9820/2487/84695/9231/10253/3170/8482/553115/286204/10252/2932/161742/2296/26508/7042/650/6772/8320/3249/2043/4092/2335/7048/9723/1947/340665/182/10371/6405/4192/2042/90/8751/4902/23603/2263/9475/10507/657/8091/2668/23187/10979/9221/3357/7474/23332/81610/5595/8092/6934/2255/8829/54361/55734/399473/3066/100507588/653/4087/200734/23462/8854/57142/4089/19…	233
BP	GO:0045088	regulation of innate immune response	221/16611	231/18800	8.09497e-05	0.000835736	0.000557112	4938/5322/83666/115362/10225/841/5359/710/8302/84166/54209/2069/9111/115004/26191/9641/3659/23170/2213/114836/100507436/6714/51311/4940/4332/2268/8651/3823/5777/3430/84282/6777/11221/54625/6352/79594/149628/3133/85363/6688/6737/3916/2358/5272/64581/6850/117854/58509/3075/10859/2896/409/51752/661/4841/56833/3146/81844/3665/11027/114609/3965/7128/117157/2219/3821/4067/10432/57169/146850/7474/100528…	221
BP	GO:0045807	positive regulation of endocytosis	96/16611	97/18800	8.17564e-05	0.0008427	0.000561753	6424/3077/54209/5054/967/718/2719/1191/7422/7018/154664/7251/10211/6850/163/284/409/84062/50632/977/5533/22871/9463/3071/1173/567/7474/26119/100506013/636/120892/6366/7448/2332/4908/26585/6609/5538/9863/84896/1950/5530/51160/196527/23011/5336/948/1601/54806/116519/867/51479/3024/348/29904/8976/1861/89780/1813/7036/3643/2624/408/55198/6363/3565/1201/55681/3673/998/3092/255738/28514/2150/1785/8527/…	96
BP	GO:0000077	DNA damage checkpoint signaling	113/16611	115/18800	8.25311e-05	0.00084931	0.00056616	57805/79858/1263/472/51776/9656/51343/51720/26270/5514/26058/5347/80279/57646/1026/988/84126/8091/1027/60561/7919/9344/197342/54465/7508/79791/51322/51065/5883/4582/6118/8555/1112/26272/9575/163859/2177/5371/11200/57551/51499/90381/8738/6154/7158/4193/7157/51514/9577/1432/1111/144715/11277/29935/65975/440275/135458/5810/545/4436/83990/3014/5781/2765/1869/4303/54962/25949/51512/79968/8451/118471/6…	113
BP	GO:0051236	establishment of RNA localization	157/16611	162/18800	8.33323e-05	0.000856172	0.000570734	10643/54830/3178/10644/472/7538/9961/130132/4600/8570/8106/677/10211/84271/1069/4641/10073/8658/9908/23144/26019/29072/23299/54890/7048/9818/23237/6428/5903/387990/4869/54847/57097/144983/9631/57510/3181/3837/7248/26993/84324/23049/9284/55746/7919/55421/65110/3800/10762/3267/9804/26097/65083/23511/2332/11097/7263/23293/10482/6830/10642/79902/23165/4686/59343/25909/4928/8021/643136/57187/10128/285…	157
BP	GO:0017157	regulation of exocytosis	196/16611	204/18800	8.40148e-05	0.000861794	0.000574482	3566/2242/83452/640/9545/2213/5873/5724/6385/23086/2268/7447/5880/3162/729230/7251/6688/3916/91683/55503/6850/8398/2932/5023/3689/2623/5582/376267/8673/30817/84062/9146/3684/6857/3598/3965/11314/23621/9498/1268/22871/2294/4067/136/3458/3071/613/9001/6853/203190/5865/1142/23332/201294/2243/10675/9783/127833/84106/5906/7784/23557/8913/6855/120892/4905/25837/4735/51760/9581/134957/5579/634/9515/9367…	196
BP	GO:1901654	response to ketone	183/16611	190/18800	8.65091e-05	0.000885953	0.000590587	10631/5176/5327/4478/10413/445/6696/1728/8061/842/5724/6714/3184/196/6586/1545/2354/23411/1977/5021/5106/358/54206/6869/2621/5734/7023/3208/9076/5031/7042/9353/3717/1946/31/1236/1535/3490/11184/5732/28960/8751/2230/9475/4507/7097/4609/551/4747/811/64083/706/11057/2782/114907/10481/51389/857/2/6366/196541/11315/598/978/5563/2770/6715/7337/266743/2629/1828/4821/56848/2155/54541/1636/4824/27158/1027…	183
BP	GO:0010810	regulation of cell-substrate adhesion	208/16611	217/18800	8.68612e-05	0.000888132	0.000592039	1295/10630/7471/10395/255743/916/1277/56477/5054/2013/6548/6714/6385/2039/81848/8631/6239/2633/5155/5880/55612/285613/2523/7422/25/9480/1399/1845/3675/5590/2192/5328/2185/50488/2932/1842/3678/8322/5295/253725/91663/3717/1946/2335/1236/5034/55604/4852/9723/182/6281/4192/4287/3491/2294/2041/2042/3987/8751/6237/3204/1758/23603/9475/246/4323/7248/10979/5879/23332/3791/79834/57662/201294/2243/4653/106…	208
BP	GO:0006665	sphingolipid metabolic process	156/16611	161/18800	9.16389e-05	0.000931221	0.000620763	54898/29095/29906/2528/3696/27163/6482/8560/64834/4758/3074/129807/8439/8398/5023/10351/53947/5580/2527/27429/142891/5007/256435/8612/8611/3491/80772/285362/2581/55852/10715/20/56624/427/130367/6487/10690/9524/9200/23659/64781/55627/259230/26154/10825/27090/51228/2531/242/83723/171546/2760/55512/8708/6609/2629/5538/165679/5660/56848/54982/51495/8702/8703/3995/127550/8877/151742/124976/2055/8706/7…	156
BP	GO:0010769	regulation of cell morphogenesis involved in differentiation	95/16611	96/18800	9.17021e-05	0.000931221	0.000620763	10630/29882/2039/9820/81848/6239/2633/1627/51265/25/23316/1399/2192/4076/6900/253725/91663/2043/1946/5034/55604/6281/4192/27067/4352/100528062/3987/26259/6792/23603/10979/5879/201294/2243/4653/10675/8829/811/79791/23363/10458/3611/8874/57091/7804/23011/51188/335/2244/1601/5063/55920/55679/7016/29904/55435/3037/5789/1398/65981/10562/11078/1793/10519/23189/80823/5048/5649/1523/28988/4739/708/5747/1…	95
BP	GO:0014020	primary neural tube formation	95/16611	96/18800	9.17021e-05	0.000931221	0.000620763	115908/10395/1857/2535/5727/7408/8323/9585/57619/6385/84678/23242/25/57216/8463/7798/7042/29072/6046/55081/1856/10653/836/8543/9968/7248/7474/4522/585/57167/2648/653/23654/6201/5567/6692/8915/131405/133/5914/4036/56963/7189/655/4976/3091/6497/2909/317/4524/5916/5898/1855/80199/65979/25902/10427/11146/7289/10370/26160/6422/57545/57822/7040/10959/10522/5076/5216/23552/144165/79977/9620/11019/7976/5…	95
BP	GO:0046330	positive regulation of JNK cascade	95/16611	96/18800	9.17021e-05	0.000931221	0.000620763	3552/51384/6504/2213/5871/4055/8312/2185/50488/5345/4615/8737/3146/1236/114609/10371/10912/128853/22881/8767/7185/7474/153769/7099/4671/90441/9344/7477/6366/10125/9479/3265/9965/5609/222643/64170/177/27035/79444/331/9258/1490/23005/57551/7189/4317/344558/9770/64127/7187/8600/351/60401/57630/54106/23162/23043/10913/939/4217/9618/153090/59341/84766/2324/28996/23236/7188/6363/6788/9867/142679/7186/2…	95
BP	GO:0042303	molting cycle	112/16611	114/18800	9.19526e-05	0.000931221	0.000620763	5154/8323/22943/3488/10269/406/11166/55612/1775/2304/27152/7042/135228/4926/162514/8549/2263/7474/3624/3889/2252/2255/3066/2736/8399/11005/4089/8861/92344/596/51083/1499/3872/6662/9575/54888/100132386/55366/3065/538/10468/9855/8643/10848/91/10855/79574/1896/60485/5187/27121/80199/85290/342574/7053/85289/337977/147183/728224/147409/3868/114803/10913/6469/2068/1001/26133/3911/8456/2131/51588/7015/2…	112
BP	GO:0042633	hair cycle	112/16611	114/18800	9.19526e-05	0.000931221	0.000620763	5154/8323/22943/3488/10269/406/11166/55612/1775/2304/27152/7042/135228/4926/162514/8549/2263/7474/3624/3889/2252/2255/3066/2736/8399/11005/4089/8861/92344/596/51083/1499/3872/6662/9575/54888/100132386/55366/3065/538/10468/9855/8643/10848/91/10855/79574/1896/60485/5187/27121/80199/85290/342574/7053/85289/337977/147183/728224/147409/3868/114803/10913/6469/2068/1001/26133/3911/8456/2131/51588/7015/2…	112
BP	GO:0009165	nucleotide biosynthetic process	243/16611	255/18800	9.2883e-05	0.00093915	0.000626048	4837/196883/83666/1635/4199/122481/54898/54209/122622/205/5165/10861/4846/7114/129607/2987/3000/1723/84875/64834/23181/32/8564/79717/2618/27109/2180/26289/3208/4880/5162/5634/51422/7378/3251/31/4843/3735/9519/55312/136/25874/1854/2181/8382/65018/9061/2023/1836/23205/8942/65220/55022/5313/9524/4831/790/9200/4522/159/50484/349565/4609/51703/81616/10135/4830/7415/100/5164/109703458/102157402/347734/…	243
BP	GO:0097529	myeloid leukocyte migration	219/16611	229/18800	9.54748e-05	0.000963826	0.000642498	3552/3627/5919/10451/7130/3958/54210/23075/6288/4283/6373/5175/5293/54209/6504/5054/972/1441/5155/6777/5880/23765/2920/6279/3672/729230/6352/7422/7499/140885/131450/6688/2358/7060/5734/727/2321/7424/2185/6850/928/3689/1230/682/7042/4615/9353/30817/56833/6347/6846/3146/7984/1803/5196/1236/114609/11314/2277/6280/4192/6364/79890/9948/4067/2919/5025/3071/51135/3269/27202/399/4681/4323/3576/5879/89766…	219
BP	GO:0030168	platelet activation	127/16611	130/18800	9.69473e-05	0.000977143	0.000651375	5154/10630/1465/10451/4627/1281/5359/6288/22915/1192/170692/8323/640/3690/84034/4846/6714/2039/5321/958/60/5155/5777/83706/10627/7450/7056/959/3315/3043/6850/928/5023/2623/1311/5580/3717/8525/2335/5196/29071/4067/4352/23657/151/3572/8526/6403/7410/152/7294/7099/2207/2243/2814/5592/388552/65991/9002/634/114897/3611/340205/7301/6814/7094/2778/5197/5291/5478/1606/6812/5336/2147/239/64805/2244/1608/3…	127
BP	GO:0035966	response to topologically incorrect protein	155/16611	160/18800	0.000100755	0.00101392	0.000675891	55741/23645/23471/1191/10956/55757/6048/871/7466/3315/7060/3308/84919/26270/1311/8720/5295/79094/3310/79139/4189/7353/7009/666/80279/4287/118424/168620/10399/1965/10013/11153/4690/51360/7494/5770/91445/91319/10133/2033/8452/23190/25822/202052/8988/64764/7415/3320/51768/7917/467/51182/10018/23376/3336/10488/3303/3329/5071/5610/92305/84236/267/4780/3313/135138/55829/10987/56886/79956/101928527/9217…	155
BP	GO:0015748	organophosphate ester transport	141/16611	145/18800	0.000102231	0.00102658	0.000684327	5359/388121/55113/285973/356/338440/4547/255022/60386/153768/114884/81671/7224/3783/10577/5306/29957/114789/50636/5580/55186/343702/5007/80772/336/58488/63910/291/286046/57605/286410/64241/57724/341/8399/79085/26154/51761/10478/6573/2030/51228/9197/284439/85320/347734/23760/1622/293/161291/345/79895/5360/84275/54020/10057/196527/119395/51012/9854/51499/335/10786/84725/2705/114786/57048/284427/921…	141
BP	GO:0042063	gliogenesis	276/16611	291/18800	0.000102584	0.00102658	0.000684327	80045/54209/30812/4781/163175/3913/55553/7101/4099/10319/6547/54587/11221/4919/170825/712/6279/729230/1191/4664/25/5583/10100/79809/3074/1399/5324/2358/2185/928/443/6900/7133/56978/2896/7042/650/482/4825/6347/2043/6774/4665/23529/55695/3912/84504/666/10215/6280/4192/128853/58158/9948/4067/3458/9463/5025/374/7223/6833/23224/1270/9968/7852/20/6659/5764/3572/4323/7097/7099/57165/429/5595/4653/10675/…	276
BP	GO:0051402	neuron apoptotic process	230/16611	241/18800	0.000102768	0.00102658	0.000684327	2730/1051/11151/54209/1728/27324/6477/842/51604/84678/472/55294/4099/356/637/3162/3672/2539/25/6648/840/7224/7466/2185/2896/284/409/5582/7042/4841/6347/3717/219699/2898/23529/3684/23621/666/4192/627/4776/100528062/836/1270/1735/8326/8846/65018/7068/3572/2668/7305/429/4671/8829/4747/4204/9244/3725/2019/56751/54463/11315/598/26471/9040/3265/7301/2065/5609/10018/4908/2876/6418/387/5071/2629/5538/596…	230
BP	GO:0003073	regulation of systemic arterial blood pressure	94/16611	95/18800	0.000102847	0.00102658	0.000684327	2013/7026/1889/4846/5155/9365/5021/6648/185/6869/2621/1522/2702/5345/134/1535/66002/3291/4923/57835/56670/80763/9424/22953/7442/81285/153/6196/585/551/4204/10391/154/5125/796/1585/148/91608/2028/387/89797/133/27035/23576/1636/83988/5331/7168/2931/1906/9283/7137/3816/367/354/5144/2149/553/5972/65125/59272/186/5800/1511/1910/5547/1359/659/1813/4879/4878/552/199800/3817/143872/1908/40/10699/1816/146…	94
BP	GO:0070988	demethylation	74/16611	74/18800	0.000103124	0.00102658	0.000684327	5253/60489/79697/55693/84678/23030/200316/54790/200315/51780/121642/200424/54890/80312/27350/84864/8846/7874/10930/8242/23028/285051/9682/6996/22992/221120/1595/7403/55818/55806/1543/359787/25974/65094/51400/1544/390245/8239/79831/79068/1577/339/8284/54784/54726/7404/23210/221656/7320/1551/1559/57379/54620/5927/23081/9760/164668/1565/1558/23133/1576/3720/23135/9582/64816/5447/80853/140564/10155/1…	74
BP	GO:0072088	nephron epithelium morphogenesis	74/16611	74/18800	0.000103124	0.00102658	0.000684327	7471/255743/5727/7490/30812/3217/2719/7422/650/6772/5311/5087/3237/2668/54361/4609/4089/3611/26585/596/51804/1499/7482/6662/7849/5310/55366/1739/64412/7481/7475/2247/9500/65266/4435/54806/84445/6928/2297/186/6943/55083/3207/6469/56998/6299/3911/130497/79192/5076/388585/3280/26249/2253/10736/153572/2737/7484/79191/652/2246/80000/9241/3975/6608/342184/2625/8642/183/6495/4070/2138/3976/170690	74
BP	GO:0019216	regulation of lipid metabolic process	320/16611	339/18800	0.000103141	0.00102658	0.000684327	3552/5154/5919/10451/80183/2171/388121/33/29095/54209/930/5165/972/2822/6714/27122/55294/10269/12/718/2268/376497/5155/6777/23411/80816/8776/32/1066/185/2053/2358/23399/10577/2321/2185/8398/8720/650/57540/5580/23541/51422/114294/64137/8525/134/1236/8013/142891/3490/476/64784/1268/8611/3491/2261/338/336/4067/340895/3458/2181/20/427/27120/3357/8897/51360/7410/26119/5467/3172/585/54361/10196/551/150…	320
BP	GO:2000027	regulation of animal organ morphogenesis	126/16611	129/18800	0.000107426	0.00106756	0.000711649	5154/115908/1857/2535/7490/57664/30812/8323/22943/79864/25876/860/947/3217/2719/3227/4919/128272/7422/25/85407/1951/57216/10252/6091/650/4300/4982/64750/340419/1856/22881/9968/10818/657/2668/5879/7474/23002/2252/55727/84870/2255/54361/59277/55897/26585/387/5083/1435/11331/9863/51804/6259/10082/219736/1499/7482/6662/7849/6092/23213/166336/655/1906/55366/7481/81839/1601/84133/2247/9500/367/54806/18…	126
BP	GO:0034440	lipid oxidation	110/16611	112/18800	0.000114096	0.00113208	0.000754656	55268/33/10449/127/84129/32/27349/51422/8013/3030/56898/1268/1376/8309/1962/246/160428/240/5467/54363/51179/23409/1375/549/10478/247/242/11001/285440/26063/10005/5264/208/55289/254013/6662/10994/79602/239/23417/2108/2109/8660/3032/5465/3033/1432/3028/205251/5191/7941/131/1384/83752/3952/3712/116285/5562/5828/5826/38/2639/3667/84649/1632/1892/83667/10455/3295/126129/55198/37/6342/207/84879/39/2360…	110
BP	GO:0009798	axis specification	93/16611	94/18800	0.000115335	0.00113905	0.000759303	7471/5727/7490/5015/5308/2114/3170/2719/23242/4188/11022/8312/80055/51668/134701/10818/657/7855/497189/7474/2255/4087/4089/8861/26005/55897/6926/23424/9573/79971/200894/1499/126668/6997/79084/57669/92129/6911/55329/6497/7475/100129278/54806/140947/8313/23493/50805/3234/4762/201164/163589/1046/6469/10409/10370/83852/4853/221400/26160/6422/10959/5080/4091/6722/441478/123016/145873/6496/7478/10736/2…	93
BP	GO:0048704	embryonic skeletal system morphogenesis	93/16611	94/18800	0.000115335	0.00113905	0.000759303	3213/3214/7703/3215/3199/860/3217/3212/3227/4188/57453/3198/29072/3203/1954/6935/7048/3204/9968/2263/4323/1301/9742/27173/3200/3211/8092/4522/5396/3201/23314/3202/4087/10265/1280/6664/3216/1746/51804/1499/3225/29985/9775/3221/655/1739/5079/3219/4088/3340/6913/3233/80199/4617/57728/3207/25902/7289/130497/145258/7046/50515/3235/79977/2253/10736/5156/2303/4325/6899/4838/257/2737/28982/7484/7291/1575…	93
BP	GO:0061326	renal tubule development	93/16611	94/18800	0.000115335	0.00113905	0.000759303	10413/7471/255743/5727/7490/30812/25937/3217/2719/7422/8842/9788/26508/650/100133941/6772/5311/5087/3237/182/8549/2668/54361/4609/7477/4089/3611/26585/596/51804/1499/7482/6662/7849/5310/55366/1739/64412/7481/7475/2247/9500/65266/4435/54806/84445/6928/2297/186/6943/55083/3207/6469/56998/6299/7021/3911/4853/130497/79192/38/5076/282679/388585/3280/26249/123016/2253/10736/28514/153572/2737/7484/79191…	93
BP	GO:0019226	transmission of nerve impulse	73/16611	73/18800	0.000116774	0.00114969	0.000766398	1890/9607/1134/4099/59283/5023/3736/6328/2898/3737/6324/3060/2281/5025/7143/23114/10242/551/6336/8913/2852/6332/11280/83700/2332/8912/2629/6334/2257/27094/5339/2693/4544/79784/8911/6335/26047/149461/4915/2475/1133/6323/2859/6326/4897/58524/5048/552/146183/10369/5024/1816/1143/1180/3673/54112/27345/6647/8506/3751/288/10368/59284/6329/57731/27092/6331/51738/183/27091/2741/1901/1812	73
BP	GO:0033555	multicellular organismal response to stress	73/16611	73/18800	0.000116774	0.00114969	0.000766398	2643/5896/7101/1977/6863/1981/64856/6869/7060/8989/57121/5582/1621/2898/1803/9856/4192/22953/5025/7442/153/4204/706/796/644139/56923/117/596/84961/824/23542/5530/3350/5728/27136/5979/6335/57679/348/3158/1910/3358/2131/2475/4914/5649/116372/207/1815/1620/5024/64854/2048/6530/6505/477/7349/2701/4842/3620/84918/6198/4929/150/2558/5179/4208/55515/41/4761/7057/4862/1812	73
BP	GO:0034764	positive regulation of transmembrane transport	204/16611	213/18800	0.00012163	0.00119481	0.000796473	6769/3627/4283/6373/23630/54209/930/219527/805/2745/760/287/6548/5724/7114/4205/718/2719/144245/2539/729230/25/81671/10268/3783/65267/2180/388581/5023/3736/9747/5031/5295/23433/482/10142/389816/6347/5311/9368/23596/187/54997/8013/6262/4923/23237/7220/3458/6833/6506/6717/65018/9001/1520/57165/3757/3460/6000/4986/844/51703/246329/2852/8218/154/342667/9446/9002/483/644139/1389/57620/3688/10345/781/3…	204
BP	GO:0007292	female gamete generation	153/16611	158/18800	0.000121732	0.00119481	0.000796473	5327/7130/3566/174/8061/2069/9985/4846/6714/472/268/9510/402381/23411/11022/3074/2185/11144/2661/5347/4880/5806/344018/11077/4192/4292/8549/5764/1761/4313/3624/668/728637/6196/54361/4609/7784/994/10017/7272/1730/147872/344758/2488/51087/130951/23424/254394/596/10361/346673/1499/126668/3625/3020/54852/79084/29781/94027/317761/339345/83943/23318/55124/8654/1906/5139/24145/51441/22932/5241/100129278…	153
BP	GO:0030010	establishment of cell polarity	139/16611	143/18800	0.000124408	0.00121919	0.000812729	4983/4478/4627/9585/9265/10253/81565/3993/55612/2934/1399/79648/286204/1003/5590/2185/143098/10252/2932/56603/5347/51421/253260/9368/1236/4926/4131/54908/2294/2047/2319/126353/10758/10399/9475/2697/7474/23332/3834/6939/57662/2302/2255/64083/9024/9826/382/10806/83700/56288/3320/6366/10565/3688/81704/387/57698/6624/1639/9750/85440/5310/81609/22841/162282/23094/9267/29899/85302/3064/2195/2258/154810…	139
BP	GO:0007059	chromosome segregation	328/16611	348/18800	0.000124852	0.00122167	0.000814381	150280/10919/5359/9113/84722/79858/54617/11011/9985/472/55294/6188/9391/164045/81565/23126/64210/10636/5885/10096/11144/10744/84944/29082/8658/79998/5347/10734/140836/4926/8379/54908/23369/4292/51203/1325/11044/23383/49856/55719/55207/10783/225689/57405/9587/51112/79892/8243/3837/26993/152185/55166/3835/55743/57820/81610/3834/728637/54921/9874/8452/9134/7272/23172/283489/7756/80218/6421/7155/1124…	328
BP	GO:0030111	regulation of Wnt signaling pathway	317/16611	336/18800	0.000127022	0.001241	0.000827263	59352/8840/10413/115908/9113/57805/7162/6424/1277/57664/164284/8323/25937/22943/10023/6425/51473/10076/6714/25876/26524/27122/2487/79816/406/4163/2719/1454/55612/1540/4188/25/29969/3485/79809/85407/3675/8312/81847/23399/27123/100507050/2932/83999/2262/8658/8322/3489/650/4300/64750/9368/6597/23240/6478/1456/7128/340419/83439/57326/4192/2300/54994/4776/22881/51366/2308/8549/10042/10399/79705/8932/2…	317
BP	GO:0002275	myeloid cell activation involved in immune response	92/16611	93/18800	0.000129326	0.00125199	0.00083459	3566/5293/54209/2242/9111/6504/640/5724/5730/2268/5777/3430/5880/3162/729230/6688/1776/6850/3689/2623/2896/284021/4615/8673/30817/3684/3598/8013/11027/3735/3965/11314/695/56670/2294/4067/136/3458/7462/613/7305/2207/201294/84106/306/84868/116449/10125/90342/6814/56848/6812/5336/22904/3596/3815/11277/867/6348/5169/2241/5581/5170/8723/27342/1113/57102/27040/6844/2624/3929/5729/148022/1524/3565/6845/…	92
BP	GO:0002793	positive regulation of peptide secretion	92/16611	93/18800	0.000129326	0.00125199	0.00083459	3077/640/2822/7226/7447/8111/6279/4826/5106/388581/2645/338557/8398/4825/3717/134/5007/25874/3123/2696/6717/6659/5950/54795/2243/5467/6934/51714/57555/2852/286676/2550/2850/7200/91608/51768/65985/116/2922/3670/5715/5213/9854/2746/5532/3091/2244/169026/8660/114131/2641/8600/6343/11132/2692/2695/2182/5581/114/952/222546/8431/3651/3630/90550/1813/7036/51762/9501/27230/5019/18/8938/6810/3814/2266/734…	92
BP	GO:0006885	regulation of pH	92/16611	93/18800	0.000129326	0.00125199	0.00083459	760/6548/6556/356/57282/887/2896/25932/479/55858/54664/56833/9498/84329/6508/57835/8992/144811/57468/84286/5595/551/23557/120892/6550/525/65082/5164/51606/23545/7337/5538/596/285335/27035/480/11261/54982/535/51463/496/389015/8671/1906/6522/9497/440400/6521/5594/553/1203/1182/9777/1811/6549/1910/4097/65010/83697/653519/506/6553/55647/10479/155066/23315/7879/84679/552/51458/282679/9114/245972/28519…	92
BP	GO:0030516	regulation of axon extension	92/16611	93/18800	0.000129326	0.00125199	0.00083459	29882/81565/4099/8482/51393/1627/7422/1826/51265/25/7224/2932/4825/1954/2335/11344/6049/9856/9723/10371/6405/4131/5802/6792/7143/343472/10507/7474/8829/6585/1808/4137/150465/57142/4133/223117/57611/57698/374946/6259/55558/10505/10501/23011/6387/91584/3897/2664/5458/65078/348/27185/1982/9037/80128/10512/118813/2803/659/89780/2017/4897/5048/56920/6722/28988/10500/10439/57609/9423/23499/7869/80031/1…	92
BP	GO:0032273	positive regulation of protein polymerization	92/16611	93/18800	0.000129326	0.00125199	0.00083459	84722/7408/2242/4233/6188/4733/51429/2185/146206/51199/79998/55971/10142/253725/9873/253260/51466/1236/55604/4926/4131/3071/6249/65018/246/5879/4690/23332/402/4868/1027/4204/148170/4137/382/89848/3320/80115/6366/442721/10458/3303/387/403/3055/64223/57606/10178/25802/1639/23116/1739/2885/1440/55243/28964/23580/6356/2241/10435/5581/9530/22919/55755/10787/2475/100506658/84630/2017/5216/5217/11135/12…	92
BP	GO:0098773	skin epidermis development	92/16611	93/18800	0.000129326	0.00125199	0.00083459	5154/8323/22943/3488/10269/11166/55612/1775/2304/27152/7042/135228/2627/4926/8549/2263/7474/3624/2252/2255/3066/2736/8399/11005/4089/8861/92344/596/51083/8546/1499/3872/6662/54888/55366/3065/538/10468/91/10855/1896/60485/27121/80199/342574/7053/337977/147183/147409/114803/10913/6469/2068/1001/26133/3911/8456/2131/51588/5970/84283/1956/64434/147495/7976/80326/4038/8717/25928/55504/28514/3890/94234…	92
BP	GO:0045665	negative regulation of neuron differentiation	72/16611	72/18800	0.00013223	0.00127622	0.000850741	30812/3199/56478/7101/4099/1977/1656/22882/2932/6900/6658/57540/5087/4211/182/10215/1270/567/429/811/23462/6657/5978/55079/1746/387/3670/4854/4821/3400/8929/1840/6662/5909/1745/655/30012/152330/9283/10660/351/58190/5458/440275/64843/2290/259266/6469/390992/7161/10220/55755/89780/5080/6532/27257/388585/3280/6496/10363/4009/9745/28514/2309/2737/5469/25871/79191/85458/4851/57534/9043	72
BP	GO:0072078	nephron tubule morphogenesis	72/16611	72/18800	0.00013223	0.00127622	0.000850741	7471/255743/5727/7490/30812/3217/2719/7422/650/5311/5087/3237/2668/54361/4609/4089/3611/26585/596/51804/1499/7482/6662/7849/5310/55366/1739/64412/7481/7475/2247/9500/65266/4435/54806/84445/6928/2297/186/6943/55083/3207/6469/56998/6299/3911/130497/79192/5076/388585/3280/26249/2253/10736/153572/2737/7484/79191/652/2246/80000/9241/3975/6608/342184/2625/8642/183/6495/4070/2138/170690	72
BP	GO:0010970	transport along microtubule	152/16611	157/18800	0.000133767	0.00128522	0.000856739	6683/79443/84709/4117/26258/81565/63971/4744/79809/3916/3315/5590/55201/84062/23299/50632/55081/57576/4131/1176/27067/7014/117178/22906/84871/2319/10749/26146/23224/22858/55207/11020/79989/89941/9001/10013/9742/6103/166379/57662/636/23557/4747/8636/388552/4137/6421/26985/89891/66000/3800/66008/3798/254263/4133/55288/10125/199953/3831/1780/22820/547/80208/403/118426/8546/23011/22920/10128/8943/581…	152
BP	GO:0031960	response to corticosteroid	152/16611	157/18800	0.000133767	0.00128522	0.000856739	5176/5327/445/1277/8061/842/5724/10076/6714/7538/6586/1545/2354/1977/5106/358/54206/3485/677/7023/9076/9353/3717/361/1535/6755/3490/3291/4192/336/594/1261/90/836/374/3931/23205/6754/5122/306/4747/178/4654/2852/7477/114907/2/196541/5978/678/11063/10018/6715/387/133/266743/2629/596/3670/2690/54541/1636/50616/2908/1490/2056/2322/1906/6898/2693/6752/1446/1369/114131/3283/6446/249/7356/142/2692/9101/4…	152
BP	GO:0046434	organophosphate catabolic process	152/16611	157/18800	0.000133767	0.00128522	0.000856739	5322/1890/151056/196463/10908/3613/5321/79887/1806/145447/23098/2819/3990/133121/8398/27124/11164/284161/5580/7378/3251/5167/22876/4907/25961/4923/336/1807/1854/79153/10380/3612/8821/23659/100137049/55627/341/55190/6996/55276/8399/7374/953/7415/100/955/26090/55512/3628/6609/200035/10591/283927/9108/5336/3417/79661/23417/8654/27329/377841/6610/128486/4913/8898/2272/51071/5728/3094/140701/252969/51…	152
BP	GO:0030148	sphingolipid biosynthetic process	108/16611	110/18800	0.00014149	0.00135736	0.000904835	54898/29095/29906/2528/6482/8560/64834/8398/5023/10351/53947/5580/142891/5007/256435/8612/8611/3491/10715/20/56624/427/130367/6487/10690/9200/55627/259230/27090/2531/242/83723/171546/8708/6609/2629/165679/56848/51495/8702/8703/127550/8877/151742/124976/2055/79603/8707/59344/6610/340485/9218/23683/253782/94103/51046/125981/9514/9215/2583/6483/55331/123099/222/5562/375298/60481/81537/5587/79071/937…	108
BP	GO:0042180	cellular ketone metabolic process	202/16611	211/18800	0.000143765	0.00137712	0.000918005	6999/2171/33/174/5165/51166/972/27122/2806/127/6777/23411/80219/57834/32/1066/8564/2819/4835/9056/650/51422/8630/1583/8013/66002/3291/85300/7167/1268/340895/23590/23657/56997/27120/8574/8942/84274/5467/54361/10196/551/341/23409/3638/653/1585/154807/51085/873/3029/634/857/883/2488/2531/11315/5978/5164/10858/2264/8912/9965/6715/3293/133/2820/5163/345/6770/208/134429/254013/6662/9572/3972/10062/2341…	202
BP	GO:0007044	cell-substrate junction assembly	91/16611	92/18800	0.000144999	0.00138063	0.000920347	10395/7205/6548/6714/6385/2039/7422/25/1845/87/2185/3678/1946/2335/3655/6281/29984/2042/3987/23603/9475/613/4323/7248/10979/5879/3915/23332/3791/79834/57662/4653/8829/54361/9344/10391/8394/84962/8861/1307/1308/26585/8874/9448/387/5795/596/7094/57669/5339/26073/4088/3273/5728/55920/5786/22998/5796/2824/7010/123720/9748/6422/395/10580/7070/90102/2017/7414/6093/10420/71/51057/5747/54828/89/3673/2349…	91
BP	GO:0022404	molting cycle process	91/16611	92/18800	0.000144999	0.00138063	0.000920347	5154/8323/22943/3488/10269/11166/55612/1775/2304/27152/7042/135228/4926/8549/2263/7474/3624/2252/2255/3066/2736/8399/11005/4089/8861/92344/596/51083/1499/3872/6662/54888/55366/3065/538/10468/9855/91/10855/1896/60485/27121/80199/342574/7053/337977/147183/147409/114803/10913/6469/2068/1001/26133/3911/8456/2131/51588/5970/84283/1956/64434/147495/7976/80326/4038/8717/25928/55504/54084/3890/94234/3404…	91
BP	GO:0022405	hair cycle process	91/16611	92/18800	0.000144999	0.00138063	0.000920347	5154/8323/22943/3488/10269/11166/55612/1775/2304/27152/7042/135228/4926/8549/2263/7474/3624/2252/2255/3066/2736/8399/11005/4089/8861/92344/596/51083/1499/3872/6662/54888/55366/3065/538/10468/9855/91/10855/1896/60485/27121/80199/342574/7053/337977/147183/147409/114803/10913/6469/2068/1001/26133/3911/8456/2131/51588/5970/84283/1956/64434/147495/7976/80326/4038/8717/25928/55504/54084/3890/94234/3404…	91
BP	GO:0032436	positive regulation of proteasomal ubiquitin-dependent protein catabolic process	91/16611	92/18800	0.000144999	0.00138063	0.000920347	1263/10134/6613/1454/1191/8312/9604/2932/51343/127544/5347/10221/4092/11337/26259/6872/10399/255488/55743/153769/120892/26263/1050/857/7415/90637/29979/3303/5071/2629/23640/131377/10425/2931/4780/57761/122809/344558/4193/1601/79699/85409/5663/64326/1453/8078/9978/285671/79016/51667/1452/1855/9655/57630/5988/10273/5886/25820/28951/54467/6923/25898/8554/9781/22933/991/144165/25897/3300/154214/5716/…	91
BP	GO:0003231	cardiac ventricle development	123/16611	126/18800	0.000146016	0.00138617	0.000924037	2535/84516/4887/4846/10269/6586/55636/8131/163/64220/2702/6091/2296/26508/53834/7468/7798/7042/9353/57493/187/4092/7048/182/6262/639/3491/2294/90/8543/4625/2263/10818/6659/657/1301/7474/1482/2280/57167/23462/7134/4089/54567/55897/6664/6926/3670/3084/7139/4061/157378/7849/7168/4036/6092/2931/5318/7049/5457/3091/8928/7481/7137/4193/64783/10848/1909/23493/60485/9464/6910/27302/5138/4194/6299/79810/5…	123
BP	GO:0051028	mRNA transport	123/16611	126/18800	0.000146016	0.00138617	0.000924037	10643/3178/10644/7538/9961/4600/8570/8106/677/84271/1069/4641/8658/9908/23144/26019/29072/23299/54890/9818/23237/6428/5903/57097/144983/9631/3181/26993/84324/23049/9284/55746/7919/55421/65110/3800/10762/3267/26097/23511/2332/11097/23293/10482/6830/10642/79902/23165/4686/59343/25909/4928/8021/643136/57187/10128/54888/56001/7514/57122/29118/6426/79023/7884/10212/10189/100101267/55998/84248/6396/843…	123
BP	GO:0010959	regulation of metal ion transport	378/16611	403/18800	0.000148235	0.00140515	0.000936688	6769/3627/10288/3958/4283/6373/23630/3077/11151/54209/930/219527/805/2745/29763/287/6548/56704/4846/57817/23704/4638/967/55636/196996/51393/3718/5155/79041/5777/7432/4302/144245/2539/6352/7018/80024/25/815/81671/10268/7466/7533/3783/65267/2185/2645/53827/8398/5023/3736/10859/353514/5349/1230/3208/409/5031/5999/482/10142/389816/920/6347/5311/9368/187/134/54997/57190/1535/11027/6324/817/3060/7009/4…	378
BP	GO:0000281	mitotic cytokinesis	71/16611	71/18800	0.00014973	0.0014151	0.000943323	6683/23157/9585/9820/51429/80258/29082/79998/5347/79884/389/51203/6651/388/9475/54443/585/79643/91782/114327/3619/375/387/403/3925/10112/23503/128866/10015/55521/341019/26073/55165/1894/27183/51652/285643/9493/51510/324/57132/10899/257364/9101/84445/5921/23636/9525/9094/9700/1058/129531/5119/11113/54902/25978/200942/6093/4628/11021/112574/27243/288/24137/6711/6242/29127/92421/116840/26586/10617	71
BP	GO:0099518	vesicle cytoskeletal trafficking	71/16611	71/18800	0.00014973	0.0014151	0.000943323	79443/26258/81565/63971/4542/5590/64005/4641/84062/4645/1176/22906/10749/4643/9001/23557/388552/4430/26985/51168/66008/3798/254263/4133/10125/55088/1780/547/4640/4647/4648/118426/8546/4646/22920/8943/282991/92558/3064/2647/283446/8263/63915/474384/474383/8976/4644/10239/80128/23291/6860/8120/8499/5048/1778/80179/4642/1201/11127/9371/55330/3799/146439/10947/55930/5861/81/26115/6794/54820/54874	71
BP	GO:0046328	regulation of JNK cascade	137/16611	141/18800	0.000151285	0.00142768	0.000951709	3552/51384/26191/6504/2213/5871/11221/1540/4055/259/140885/29969/1845/8312/2185/2218/50488/5345/23239/4615/171392/8737/3146/2898/1236/114609/10371/10912/128853/2047/22881/8767/5911/65018/7185/7474/153769/7099/54986/4671/90441/9344/7477/6366/10125/9479/3265/9965/5609/10114/64853/222643/9448/64170/5071/177/27035/27250/23542/79444/331/9258/1490/23005/57551/7189/4317/10987/344558/9770/64127/9611/4221…	137
BP	GO:0032496	response to lipopolysaccharide	314/16611	333/18800	0.000156197	0.00147023	0.000980075	4057/3552/3627/4016/10288/445/10225/841/4283/6373/1051/2643/54209/10417/923/941/26191/5054/842/114769/5724/3595/4846/6714/57817/1234/129607/6556/7538/4795/356/11221/2920/6279/7056/10949/5106/6352/8106/9450/8564/25/6648/140885/85363/4064/6688/6197/5734/3656/117854/58509/1604/10859/2623/7133/9076/4615/10594/3587/6347/3717/1948/10221/3146/79931/10865/5196/4843/1236/11027/114609/3965/7128/80380/1268/…	314
BP	GO:0002573	myeloid leukocyte differentiation	201/16611	210/18800	0.000156256	0.00147023	0.000980075	4057/8840/4627/7130/841/1051/5293/54209/1969/2242/29887/9607/5971/972/3600/6714/861/3696/126014/55294/5153/6988/128506/4318/2719/23411/8111/4055/3635/10538/7422/7018/116071/10100/1943/677/6688/25979/11025/10859/2623/1230/5295/171392/920/10221/8737/135228/3665/54997/5196/1236/3059/7048/8544/4067/3662/3458/3123/3204/79705/10234/7037/7097/3624/7305/7099/3658/1436/4609/3428/2124/22985/7030/3593/3725/…	201
BP	GO:0034446	substrate adhesion-dependent cell spreading	107/16611	109/18800	0.000157527	0.00147565	0.000983688	10630/29780/3690/6714/3913/2039/81848/6239/2633/10319/83706/25/1399/2192/22854/8322/5295/253725/91663/1946/2335/5034/55604/79778/3912/3695/6281/4192/2041/84168/3685/3987/8516/23603/10979/5879/3915/79834/201294/2243/4653/10675/8829/59277/811/11149/3914/9404/1942/23380/3611/7301/80725/8874/64098/84628/57091/387/9341/22798/55698/335/2244/7399/1601/55920/55679/2241/7016/55435/3037/10461/7010/1398/105…	107
BP	GO:0036503	ERAD pathway	107/16611	109/18800	0.000157527	0.00147565	0.000983688	115290/55741/127733/10134/10206/11236/10956/55757/6048/7466/8975/26270/7184/79139/4189/7327/7353/26232/4287/126433/57333/4121/118424/285533/55139/51035/80020/1047/91147/91445/5706/91319/23190/811/91304/9024/202052/10869/857/7415/10299/29979/7917/337867/51465/5071/51136/7706/10277/54557/92305/81502/84236/267/55298/4780/55829/56886/79982/7993/93611/9097/10613/342897/550/11160/51009/80267/55432/2015…	107
BP	GO:0046545	development of primary female sexual characteristics	107/16611	109/18800	0.000157527	0.00147565	0.000983688	7130/1051/7490/174/2069/1495/7026/4846/101927581/6714/472/268/56729/6586/9510/6777/23411/63951/7422/2189/10184/11144/8322/409/2296/2661/9353/5806/836/4323/23205/4313/3624/3791/89766/668/59338/54361/4609/7784/7425/4089/2/344758/2488/598/26471/7337/117/596/3625/6700/3417/83943/6092/56956/57122/10468/5241/3815/2796/2175/4438/431707/7544/8892/9468/269/675/9210/4254/132625/84159/23626/3952/8204/2620/6…	107
BP	GO:0048515	spermatid differentiation	176/16611	183/18800	0.000160761	0.00150374	0.00100241	54970/10919/9985/84229/83853/26108/2189/116369/9425/11144/286464/89765/146849/9576/26038/57095/152015/9519/317719/9403/84223/79582/283629/25981/255101/9148/84071/283417/6691/79989/8382/81492/132141/57820/375337/168391/6305/585/5819/79925/26256/54763/23762/27125/91978/11057/50846/83983/83700/171484/83942/128637/3148/11063/51465/338773/8195/55818/160762/55779/7142/6406/1738/3020/5414/257044/84236/4…	176
BP	GO:0007519	skeletal muscle tissue development	150/16611	155/18800	0.000161434	0.00150782	0.00100513	4223/63950/221662/30812/84466/7093/10791/1134/7026/406/7504/23764/858/245806/1827/10211/59269/56603/3679/26508/3142/8320/64208/57190/9328/150572/607/4209/2047/90/22953/29895/3481/9148/1073/11023/51676/10324/6840/668/2033/4868/844/56203/11149/4654/26263/246329/6261/3344/79647/10869/857/5307/196541/26471/58/221496/6664/9975/3131/467/2876/3164/387/2817/596/1756/51804/5530/131377/8929/1499/4534/2006/…	150
BP	GO:0060606	tube closure	90/16611	91/18800	0.000162554	0.00151163	0.00100767	115908/10395/1857/2535/5727/7408/8323/9585/57619/6385/84678/23242/25/57216/8463/7042/29072/6046/55081/1856/10653/836/8543/9968/7248/7474/4522/2255/585/57167/2648/23654/6201/5567/6692/8915/131405/133/5914/4036/56963/7189/4976/6497/2909/317/4524/5916/5898/1855/80199/65979/25902/10427/11146/7289/10370/26160/6422/57545/57822/7040/10959/10522/5076/5216/23552/144165/79977/9620/11019/7976/54903/6491/557…	90
BP	GO:0072080	nephron tubule development	90/16611	91/18800	0.000162554	0.00151163	0.00100767	10413/7471/255743/5727/7490/30812/25937/3217/2719/7422/8842/9788/26508/650/100133941/6772/5311/5087/3237/182/2668/54361/4609/7477/4089/3611/26585/596/51804/1499/7482/6662/7849/5310/55366/1739/64412/7481/7475/2247/9500/65266/4435/54806/84445/6928/2297/186/6943/55083/3207/6469/56998/6299/7021/3911/4853/130497/79192/38/5076/282679/388585/3280/26249/2253/10736/28514/153572/2737/7484/79191/4851/652/22…	90
BP	GO:0090277	positive regulation of peptide hormone secretion	90/16611	91/18800	0.000162554	0.00151163	0.00100767	3077/640/2822/7226/7447/8111/4826/5106/388581/2645/338557/8398/4825/3717/5007/25874/3123/2696/6717/6659/5950/54795/2243/5467/6934/51714/57555/2852/286676/2550/2850/7200/91608/51768/65985/116/2922/3670/5715/5213/9854/2746/5532/3091/2244/169026/8660/114131/2641/8600/6343/11132/2692/2695/2182/5581/114/952/222546/8431/3651/3630/90550/1813/7036/51762/9501/27230/5019/18/8938/6810/3814/2266/7349/2864/27…	90
BP	GO:1903522	regulation of blood circulation	247/16611	260/18800	0.0001661	0.00154236	0.00102816	1829/23630/84525/2643/805/287/6548/1674/1889/4846/23704/624/10269/4205/6547/79041/5021/25/6271/185/153396/6869/489/125111/5023/57413/2702/7042/5999/482/10142/3274/1621/3717/4092/134/6324/817/10371/476/6262/5350/6508/10008/80763/7220/2281/3781/5025/7442/3269/1573/4625/9732/6717/9631/151/7068/4313/2697/6327/152/1131/1482/54795/3757/153/2243/845/100506013/10242/492/55328/551/6336/29119/8913/11149/65…	247
BP	GO:0007224	smoothened signaling pathway	136/16611	140/18800	0.000166782	0.00154644	0.00103087	9033/132884/916/83871/5727/1495/5015/51473/80210/860/9231/2719/64927/84662/79809/23432/27152/57540/64399/4825/5167/1954/55081/7048/2294/8445/51668/139411/10399/11020/79989/2263/2735/9742/374654/221322/5396/2255/79770/8636/4735/57560/50846/2736/7415/26005/5567/55835/79867/92344/403/4821/80178/64839/9786/200894/27077/5992/3169/200728/6738/9283/51098/55717/204851/139741/79583/7545/3340/200845/8643/5…	136
[truncated: 1,243 more rows]
